# Supplementary material
Source: HighWire-hosted journal article supplement (doi:10.1101/rna.080681.125)
Supplement: Supplemental_Fig_S1.pdf [file Supplemental_Fig_S1.pdf]

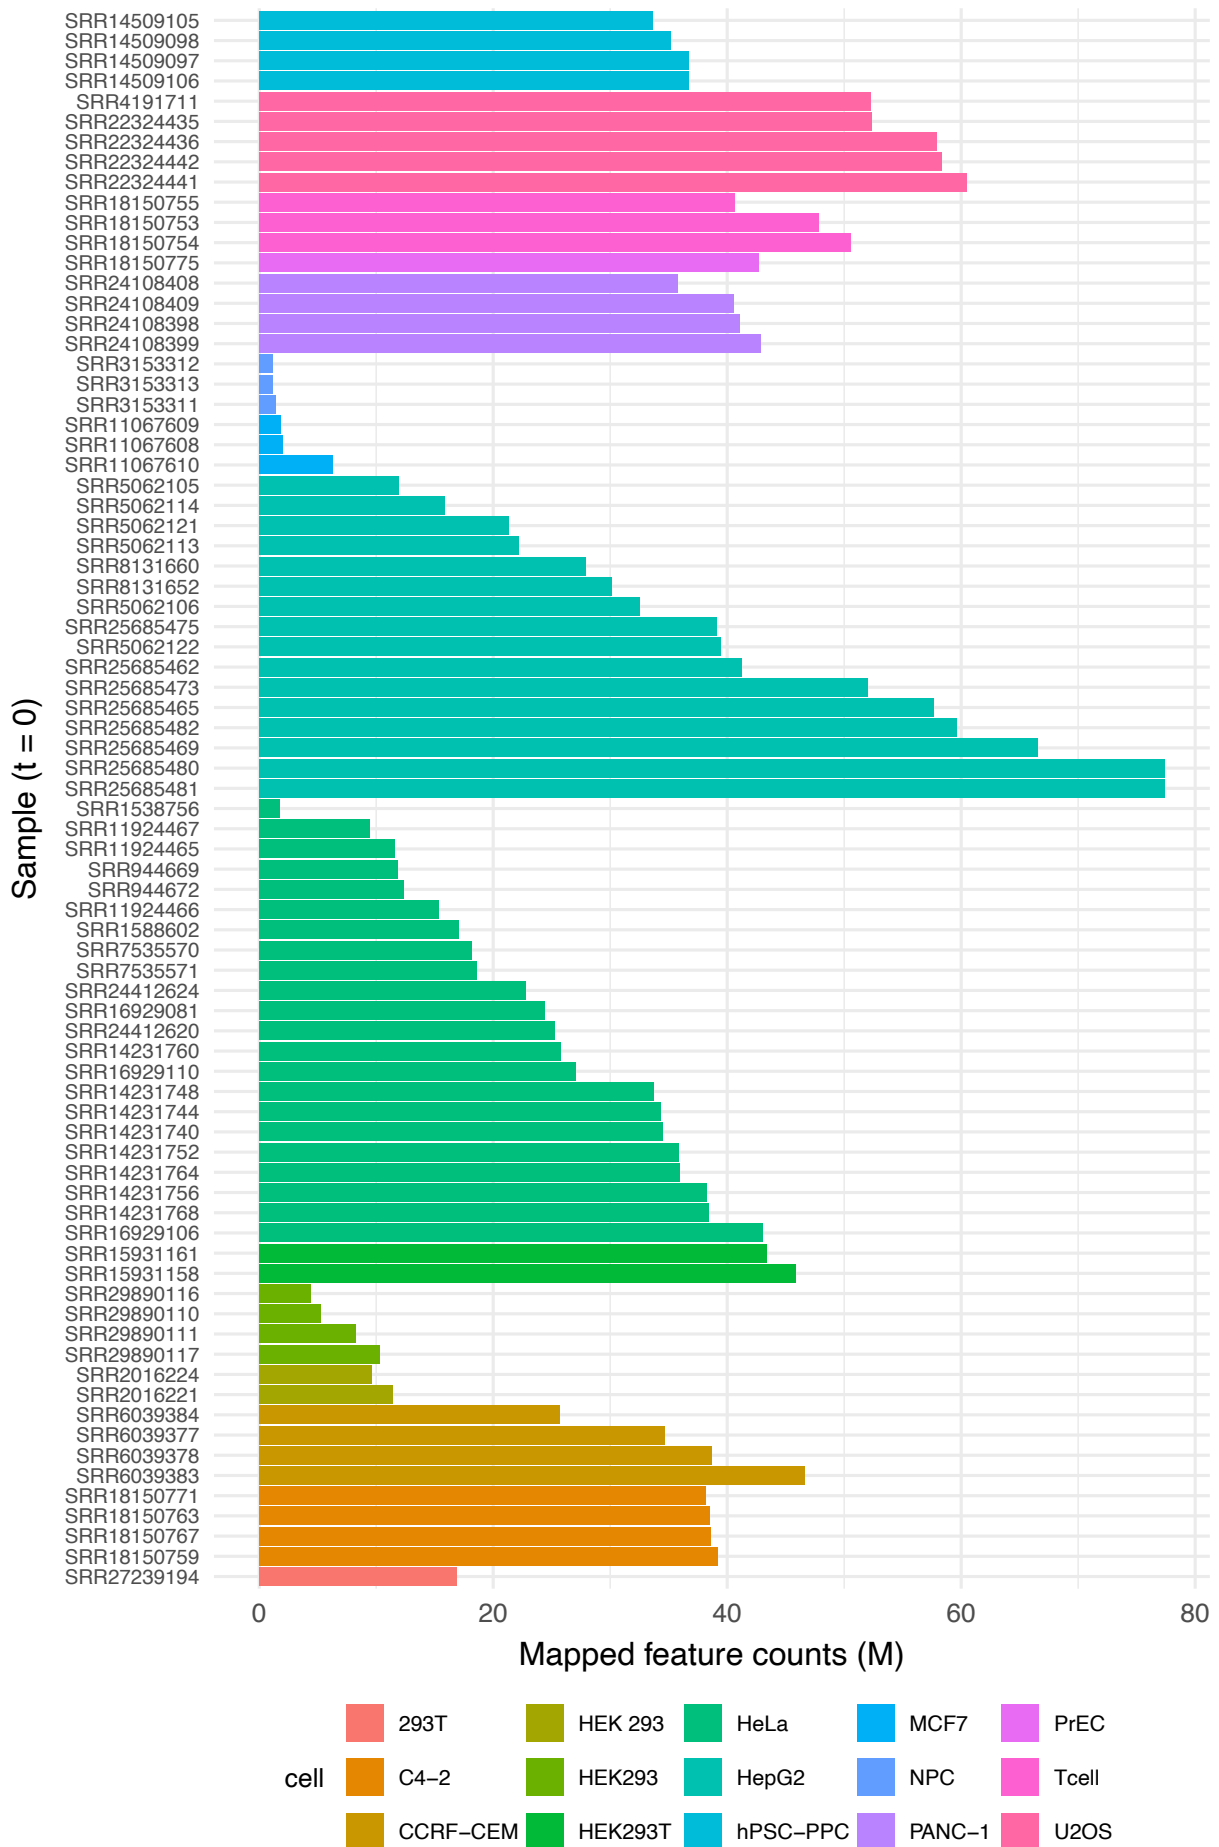

**Figure S1.** Bar plot of total mapped reads across control samples at 0 hour from the compiled Actinomycin D time-course datasets.
