# Supplementary material
Source: HighWire-hosted journal article supplement (doi:10.1101/rna.080681.125)
Supplement: Supplemental_Fig_S3.pdf [file Supplemental_Fig_S3.pdf]

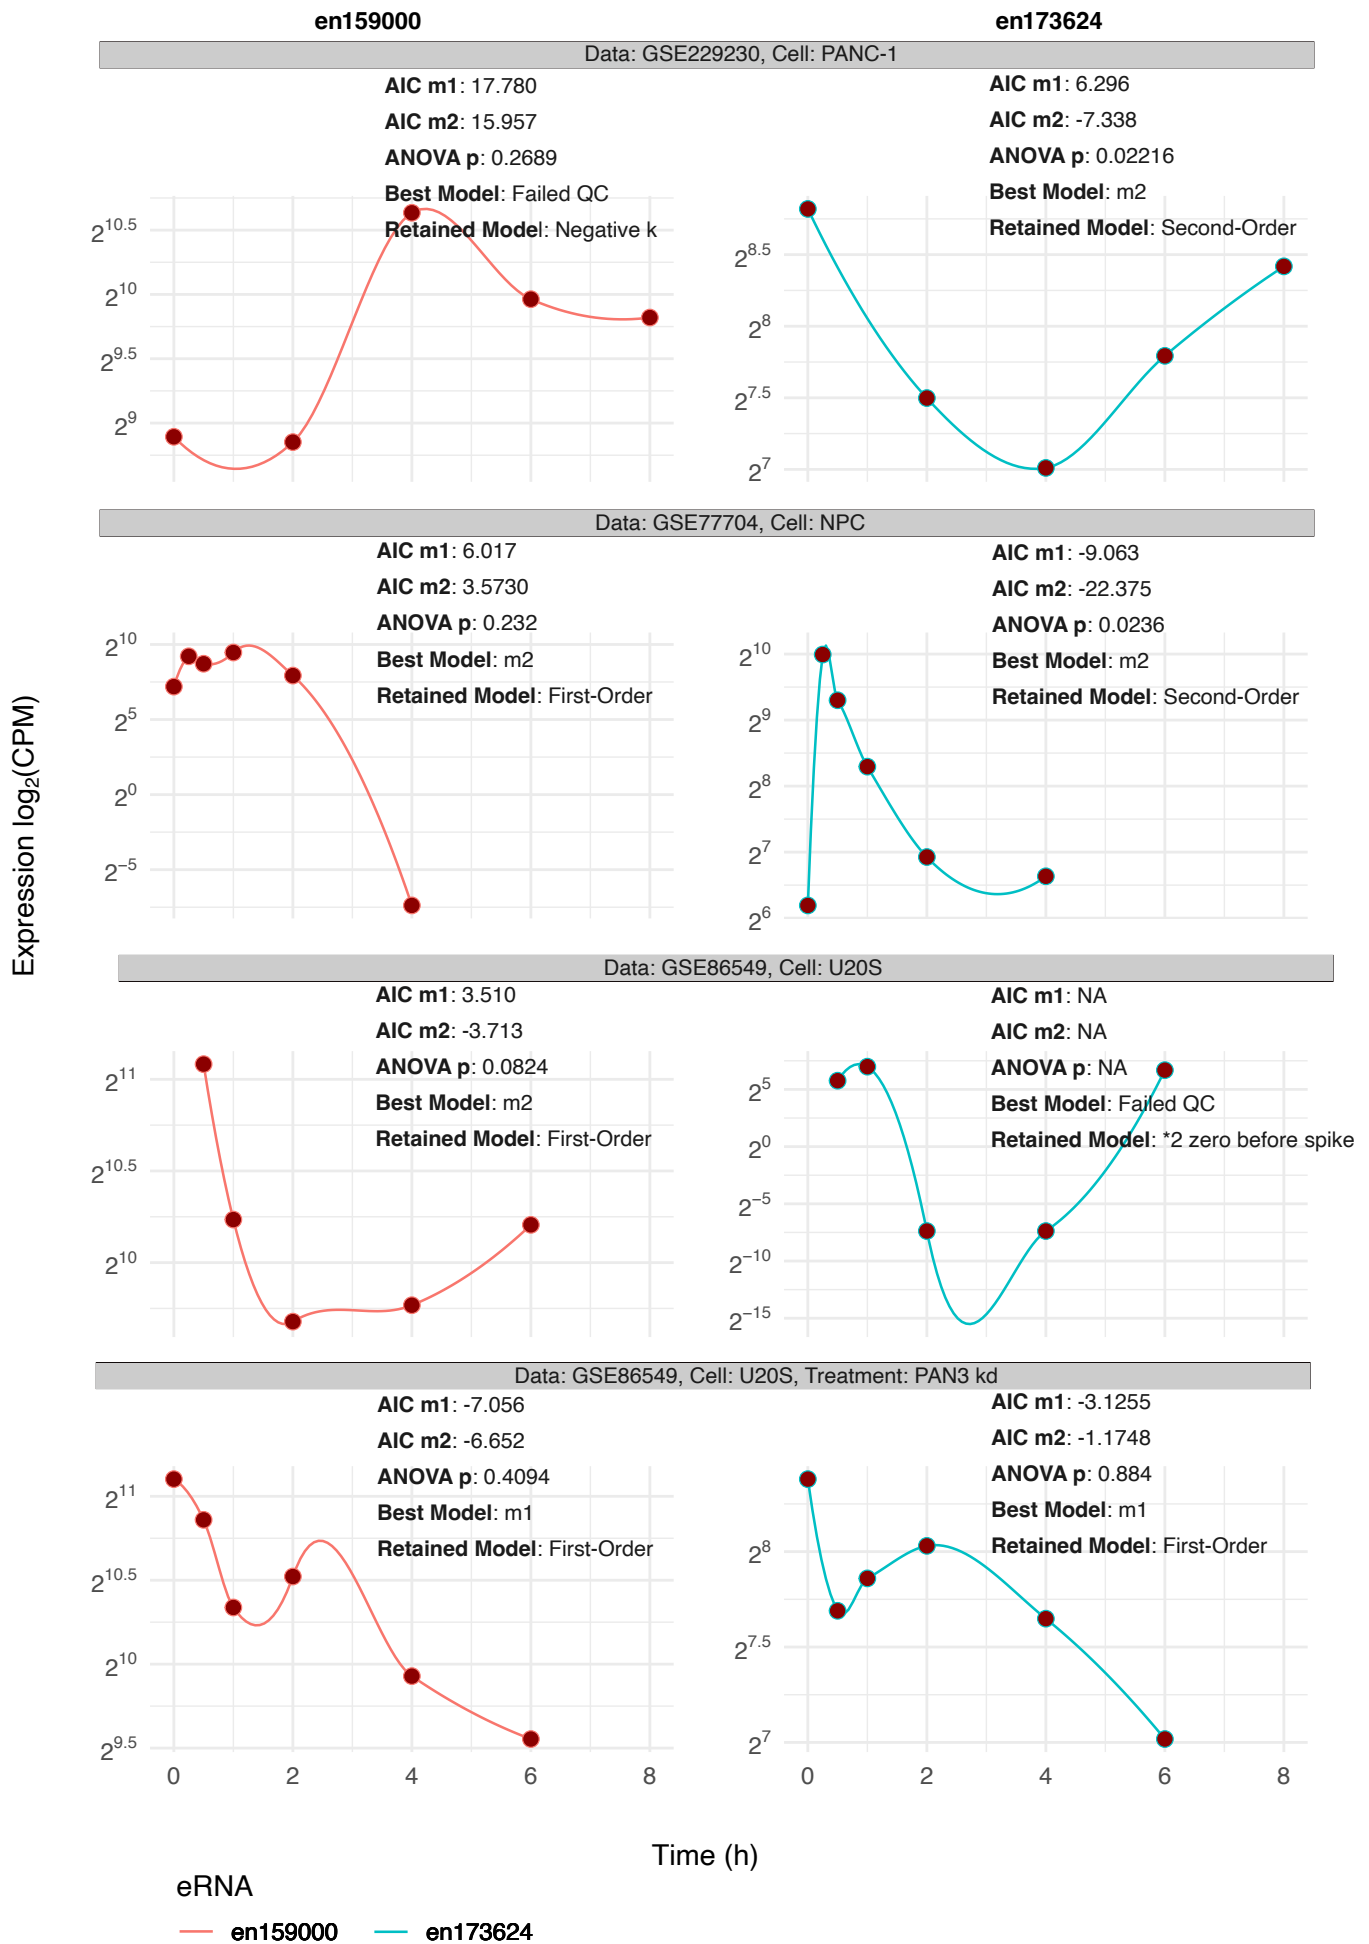

**Figure S3.** Example eRNA decay curves illustrating fitting of first-order exponential decay and second-order kinetic models to CPM-normalized eRNA time-course data. Cases where second-order models provide a better fit, and quality control issues such as negative decay rates or transient spikes following consecutive zero-expression measurements are annotated.
