# Supplementary material
Source: HighWire-hosted journal article supplement (doi:10.1101/rna.080681.125)
Supplement: Supplemental_Fig_S5.pdf [file Supplemental_Fig_S5.pdf]

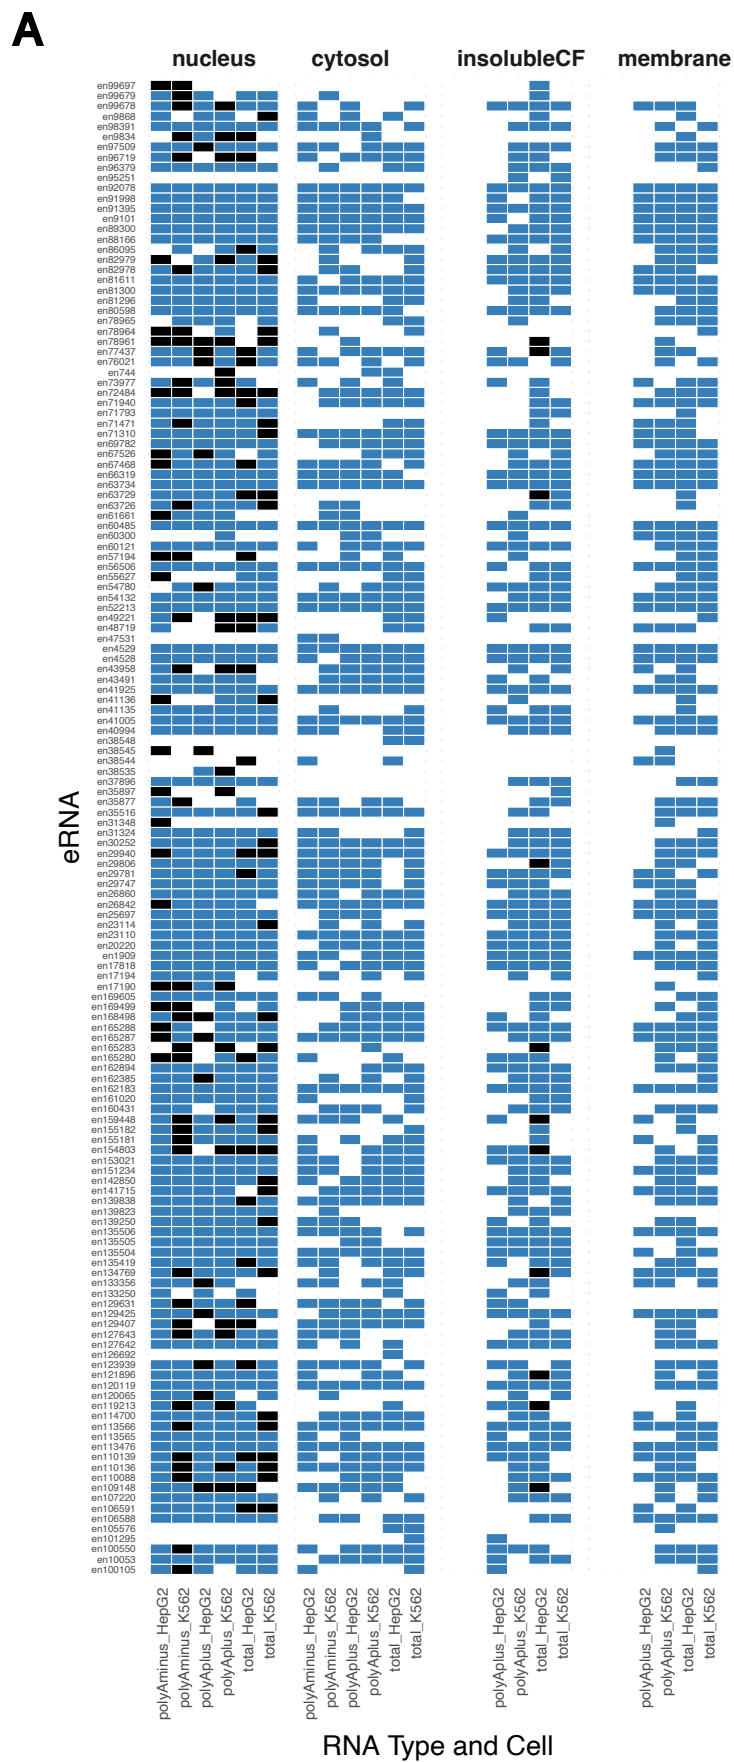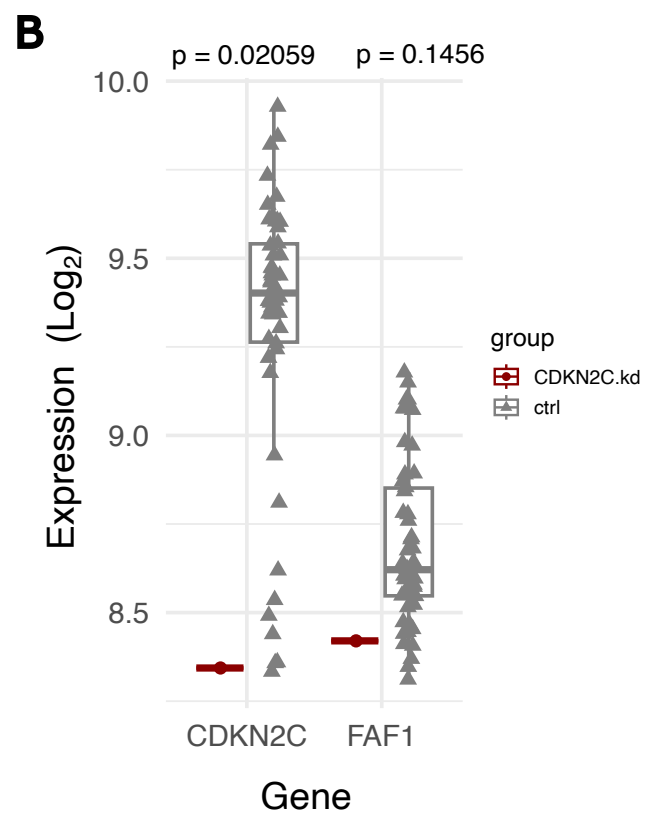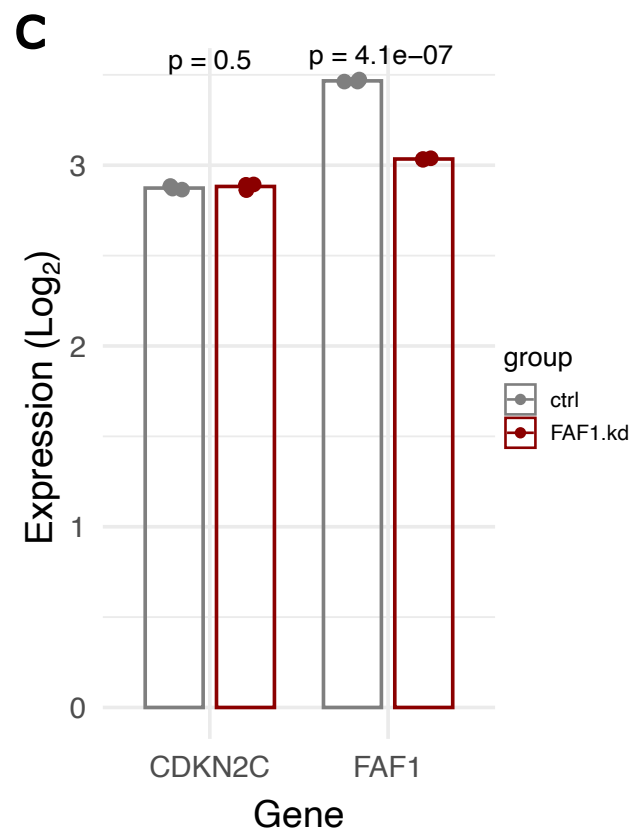

**Figure S5.** (A) Heatmap of 186 regulatory eRNAs across subcellular fractions in K562 and HepG2 cells. eRNAs are grouped by subcellular location (nucleus, cytosol, insoluble cytoplasmic fraction, and membrane), and colour intensity reflects expression levels (CPM). Expression data were extracted from the eRNAkit resource. (B) Boxplot showing expression of CDKN2C and FAF1 in CDKN2C knockdown versus control samples (GSE31534).  $p$  indicates comparison of knockdown versus control by the Test of Deficit. (C) Bar plot showing expression of CDKN2C and FAF1 in FAF1 knockdown versus control samples (GSE71665).  $p$  indicates comparison of knockdown versus control by Student's t-test.
