# Supplementary material
Source: HighWire-hosted journal article supplement (doi:10.1101/rna.080681.125)
Supplement: Supplemental_Table_S1.xlsx [file Supplemental_Table_S1.xlsx]

## Sheet: Table S1
Summary of RNA-Seq datasets used for transcriptome-wide RNA decay analysis. This table lists publicly available time-course RNA-Seq experiments following Actinomycin D treatment across various human cell types. Each entry includes information on the cell line or tissue, treatment time points, number of replicates, and source accession IDs. These datasets were used to estimate transcript half-live…
column details
run	SRA identification for the samples
cell	Cell name
genotype	Details of molecular pertubations
treatment	Details of extra treatments applied on the cells
gid	Unique GEO accession number for the sample
LibraryLayout	The sequencing lay out
rep	Replicate number within the same DEO dataset
time	Time post-actinomycin D treatment
actd	Indication of actinomycin D treatment
geo	The GEO dataset where the sample is included
comment	Special curation comment if any.
set	ID to track the full time course where the sample is included
run	cell	genotype	treatment	gid	LibraryLayout	rep	time	actd	geo	comment	set
SRR11067608	MCF7	ctrl	ctrl	GSM4306459	PAIRED	1	0h		GSE145097		GSE145097_1_ctrl_MCF7_ctrl
SRR11067609	MCF7	ctrl	ctrl	GSM4306460	PAIRED	2	0h		GSE145097		GSE145097_2_ctrl_MCF7_ctrl
SRR11067610	MCF7	ctrl	ctrl	GSM4306461	PAIRED	3	0h		GSE145097		GSE145097_3_ctrl_MCF7_ctrl
SRR11067611	MCF7	ctrl	ctrl	GSM4306462	PAIRED	1	2h	yes	GSE145097		GSE145097_1_ctrl_MCF7_ctrl
SRR11067612	MCF7	ctrl	ctrl	GSM4306463	PAIRED	2	2h	yes	GSE145097		GSE145097_2_ctrl_MCF7_ctrl
SRR11067613	MCF7	ctrl	ctrl	GSM4306464	PAIRED	3	2h	yes	GSE145097		GSE145097_3_ctrl_MCF7_ctrl
SRR11067614	MCF7	ctrl	ctrl	GSM4306465	PAIRED	1	4h	yes	GSE145097		GSE145097_1_ctrl_MCF7_ctrl
SRR11067615	MCF7	ctrl	ctrl	GSM4306466	PAIRED	2	4h	yes	GSE145097		GSE145097_2_ctrl_MCF7_ctrl
SRR11067616	MCF7	ctrl	ctrl	GSM4306467	PAIRED	3	4h	yes	GSE145097		GSE145097_3_ctrl_MCF7_ctrl
SRR11067623	MCF7	CPT 6uM, 24 hours	CPT 6uM, 24 hours	GSM4306474	PAIRED	2	2h	yes	GSE145097		GSE145097_2_CPT 6uM, 24 hours_MCF7_CPT 6uM, 24 hours
SRR11067625	MCF7	CPT 6uM, 24 hours	CPT 6uM, 24 hours	GSM4306476	PAIRED	2	4h	yes	GSE145097		GSE145097_2_CPT 6uM, 24 hours_MCF7_CPT 6uM, 24 hours
SRR11067627	MCF7	CPT 6uM, 24 hours	CPT 6uM, 24 hours	GSM4306478	PAIRED	2	6h	yes	GSE145097		GSE145097_2_CPT 6uM, 24 hours_MCF7_CPT 6uM, 24 hours
SRR11924465	HeLa	ctrl		GSM4591174	PAIRED	1	0h		GSE151805		GSE151805_1_ctrl_HeLa_NA
SRR11924466	HeLa	ctrl		GSM4591175	PAIRED	2	0h		GSE151805		GSE151805_2_ctrl_HeLa_NA
SRR11924467	HeLa	ctrl		GSM4591176	PAIRED	3	0h		GSE151805		GSE151805_3_ctrl_HeLa_NA
SRR11924468	HeLa	ctrl		GSM4591177	PAIRED	1	2h	yes	GSE151805		GSE151805_1_ctrl_HeLa_NA
SRR11924469	HeLa	ctrl		GSM4591178	PAIRED	2	2h	yes	GSE151805		GSE151805_2_ctrl_HeLa_NA
SRR11924470	HeLa	ctrl		GSM4591179	PAIRED	3	2h	yes	GSE151805		GSE151805_3_ctrl_HeLa_NA
SRR11924471	HeLa	ctrl		GSM4591180	PAIRED	1	5h	yes	GSE151805		GSE151805_1_ctrl_HeLa_NA
SRR11924472	HeLa	ctrl		GSM4591181	PAIRED	2	5h	yes	GSE151805		GSE151805_2_ctrl_HeLa_NA
SRR11924473	HeLa	ctrl		GSM4591182	PAIRED	3	5h	yes	GSE151805		GSE151805_3_ctrl_HeLa_NA
SRR11924474	HeLa	ctrl		GSM4591183	PAIRED	1	9h	yes	GSE151805		GSE151805_1_ctrl_HeLa_NA
SRR11924475	HeLa	ctrl		GSM4591184	PAIRED	2	9h	yes	GSE151805		GSE151805_2_ctrl_HeLa_NA
SRR11924476	HeLa	ctrl		GSM4591185	PAIRED	3	9h	yes	GSE151805		GSE151805_3_ctrl_HeLa_NA
SRR14231740	HeLa	ctrl		GSM5239844	SINGLE	1	0h		GSE172019		GSE172019_1_ctrl_HeLa_NA
SRR14231741	HeLa	ctrl		GSM5239845	SINGLE	1	2h	yes	GSE172019		GSE172019_1_ctrl_HeLa_NA
SRR14231742	HeLa	ctrl		GSM5239846	SINGLE	1	4h	yes	GSE172019		GSE172019_1_ctrl_HeLa_NA
SRR14231743	HeLa	ctrl		GSM5239847	SINGLE	1	6h	yes	GSE172019		GSE172019_1_ctrl_HeLa_NA
SRR14231744	HeLa	RNF219 KO		GSM5239848	SINGLE	1	0h		GSE172019		GSE172019_1_RNF219 KO_HeLa_NA
SRR14231745	HeLa	RNF219 KO		GSM5239849	SINGLE	1	2h	yes	GSE172019		GSE172019_1_RNF219 KO_HeLa_NA
SRR14231746	HeLa	RNF219 KO		GSM5239850	SINGLE	1	4h	yes	GSE172019		GSE172019_1_RNF219 KO_HeLa_NA
SRR14231747	HeLa	RNF219 KO		GSM5239851	SINGLE	1	6h	yes	GSE172019		GSE172019_1_RNF219 KO_HeLa_NA
SRR14231748	HeLa	RNF219 KO + RNF219-WT		GSM5239852	SINGLE	1	0h		GSE172019		GSE172019_1_RNF219 KO + RNF219-WT_HeLa_NA
SRR14231749	HeLa	RNF219 KO + RNF219-WT		GSM5239853	SINGLE	1	2h	yes	GSE172019		GSE172019_1_RNF219 KO + RNF219-WT_HeLa_NA
SRR14231750	HeLa	RNF219 KO + RNF219-WT		GSM5239854	SINGLE	1	4h	yes	GSE172019		GSE172019_1_RNF219 KO + RNF219-WT_HeLa_NA
SRR14231751	HeLa	RNF219 KO + RNF219-WT		GSM5239855	SINGLE	1	6h	yes	GSE172019		GSE172019_1_RNF219 KO + RNF219-WT_HeLa_NA
SRR14231752	HeLa	RNF219 KO + RNF219-mut		GSM5239856	SINGLE	1	0h		GSE172019		GSE172019_1_RNF219 KO + RNF219-mut_HeLa_NA
SRR14231753	HeLa	RNF219 KO + RNF219-mut		GSM5239857	SINGLE	1	2h	yes	GSE172019		GSE172019_1_RNF219 KO + RNF219-mut_HeLa_NA
SRR14231754	HeLa	RNF219 KO + RNF219-mut		GSM5239858	SINGLE	1	4h	yes	GSE172019		GSE172019_1_RNF219 KO + RNF219-mut_HeLa_NA
SRR14231755	HeLa	RNF219 KO + RNF219-mut		GSM5239859	SINGLE	1	6h	yes	GSE172019		GSE172019_1_RNF219 KO + RNF219-mut_HeLa_NA
SRR14231756	HeLa	ctrl		GSM5239860	SINGLE	2	0h		GSE172019		GSE172019_2_ctrl_HeLa_NA
SRR14231757	HeLa	ctrl		GSM5239861	SINGLE	2	2h	yes	GSE172019		GSE172019_2_ctrl_HeLa_NA
SRR14231758	HeLa	ctrl		GSM5239862	SINGLE	2	4h	yes	GSE172019		GSE172019_2_ctrl_HeLa_NA
SRR14231759	HeLa	ctrl		GSM5239863	SINGLE	2	6h	yes	GSE172019		GSE172019_2_ctrl_HeLa_NA
SRR14231760	HeLa	RNF219 KO		GSM5239864	SINGLE	2	0h		GSE172019		GSE172019_2_RNF219 KO_HeLa_NA
SRR14231761	HeLa	RNF219 KO		GSM5239865	SINGLE	2	2h	yes	GSE172019		GSE172019_2_RNF219 KO_HeLa_NA
SRR14231762	HeLa	RNF219 KO		GSM5239866	SINGLE	2	4h	yes	GSE172019		GSE172019_2_RNF219 KO_HeLa_NA
SRR14231763	HeLa	RNF219 KO		GSM5239867	SINGLE	2	6h	yes	GSE172019		GSE172019_2_RNF219 KO_HeLa_NA
SRR14231764	HeLa	RNF219 KO + RNF219-WT		GSM5239868	SINGLE	2	0h		GSE172019		GSE172019_2_RNF219 KO + RNF219-WT_HeLa_NA
SRR14231765	HeLa	RNF219 KO + RNF219-WT		GSM5239869	SINGLE	2	2h	yes	GSE172019		GSE172019_2_RNF219 KO + RNF219-WT_HeLa_NA
SRR14231766	HeLa	RNF219 KO + RNF219-WT		GSM5239870	SINGLE	2	4h	yes	GSE172019		GSE172019_2_RNF219 KO + RNF219-WT_HeLa_NA
SRR14231767	HeLa	RNF219 KO + RNF219-WT		GSM5239871	SINGLE	2	6h	yes	GSE172019		GSE172019_2_RNF219 KO + RNF219-WT_HeLa_NA
SRR14231768	HeLa	RNF219 KO + RNF219-mut		GSM5239872	SINGLE	2	0h		GSE172019		GSE172019_2_RNF219 KO + RNF219-mut_HeLa_NA
SRR14231769	HeLa	RNF219 KO + RNF219-mut		GSM5239873	SINGLE	2	2h	yes	GSE172019		GSE172019_2_RNF219 KO + RNF219-mut_HeLa_NA
SRR14231771	HeLa	RNF219 KO + RNF219-mut		GSM5239875	SINGLE	2	6h	yes	GSE172019		GSE172019_2_RNF219 KO + RNF219-mut_HeLa_NA
SRR14509097	hPSC-PPC	ctrl	ctrl	GSM5291800	PAIRED	1	0h		GSE163945,GSE163964		GSE163945,GSE163964_1_ctrl_hPSC-PPC_ctrl
SRR14509098	hPSC-PPC	ctrl	ctrl	GSM5291801	PAIRED	2	0h		GSE163945,GSE163964		GSE163945,GSE163964_2_ctrl_hPSC-PPC_ctrl
SRR14509099	hPSC-PPC	ctrl	ctrl	GSM5291802	PAIRED	1	1h	yes	GSE163945,GSE163964		GSE163945,GSE163964_1_ctrl_hPSC-PPC_ctrl
SRR14509100	hPSC-PPC	ctrl	ctrl	GSM5291803	PAIRED	2	1h	yes	GSE163945,GSE163964		GSE163945,GSE163964_2_ctrl_hPSC-PPC_ctrl
SRR14509101	hPSC-PPC	ctrl	ctrl	GSM5291804	PAIRED	1	2h	yes	GSE163945,GSE163964		GSE163945,GSE163964_1_ctrl_hPSC-PPC_ctrl
SRR14509102	hPSC-PPC	ctrl	ctrl	GSM5291805	PAIRED	2	2h	yes	GSE163945,GSE163964		GSE163945,GSE163964_2_ctrl_hPSC-PPC_ctrl
SRR14509103	hPSC-PPC	ctrl	ctrl	GSM5291806	PAIRED	1	3h	yes	GSE163945,GSE163964		GSE163945,GSE163964_1_ctrl_hPSC-PPC_ctrl
SRR14509104	hPSC-PPC	ctrl	ctrl	GSM5291807	PAIRED	2	3h	yes	GSE163945,GSE163964		GSE163945,GSE163964_2_ctrl_hPSC-PPC_ctrl
SRR14509105	hPSC-PPC	A5-KO	A5-KO	GSM5291808	PAIRED	1	0h		GSE163945,GSE163964		GSE163945,GSE163964_1_A5-KO_hPSC-PPC_A5-KO
SRR14509106	hPSC-PPC	A5-KO	A5-KO	GSM5291809	PAIRED	2	0h		GSE163945,GSE163964		GSE163945,GSE163964_2_A5-KO_hPSC-PPC_A5-KO
SRR14509107	hPSC-PPC	A5-KO	A5-KO	GSM5291810	PAIRED	1	1h	yes	GSE163945,GSE163964		GSE163945,GSE163964_1_A5-KO_hPSC-PPC_A5-KO
SRR14509108	hPSC-PPC	A5-KO	A5-KO	GSM5291811	PAIRED	2	1h	yes	GSE163945,GSE163964		GSE163945,GSE163964_2_A5-KO_hPSC-PPC_A5-KO
SRR14509109	hPSC-PPC	A5-KO	A5-KO	GSM5291812	PAIRED	1	2h	yes	GSE163945,GSE163964		GSE163945,GSE163964_1_A5-KO_hPSC-PPC_A5-KO
SRR14509110	hPSC-PPC	A5-KO	A5-KO	GSM5291813	PAIRED	2	2h	yes	GSE163945,GSE163964		GSE163945,GSE163964_2_A5-KO_hPSC-PPC_A5-KO
SRR14509111	hPSC-PPC	A5-KO	A5-KO	GSM5291814	PAIRED	1	3h	yes	GSE163945,GSE163964		GSE163945,GSE163964_1_A5-KO_hPSC-PPC_A5-KO
SRR14509112	hPSC-PPC	A5-KO	A5-KO	GSM5291815	PAIRED	2	3h	yes	GSE163945,GSE163964		GSE163945,GSE163964_2_A5-KO_hPSC-PPC_A5-KO
SRR15309004	HMLE	ctrl		GSM5493343	SINGLE	2	0h	yes	GSE181237		GSE181237_2_ctrl_HMLE_NA
SRR15309006	HMLE	ctrl		GSM5493344	SINGLE	3	0h	yes	GSE181237		GSE181237_3_ctrl_HMLE_NA
SRR15309008	HMLE	ctrl		GSM5493345	SINGLE	1	1.5h	yes	GSE181237		GSE181237_1_ctrl_HMLE_NA
SRR15309010	HMLE	ctrl		GSM5493346	SINGLE	2	1.5h	yes	GSE181237		GSE181237_2_ctrl_HMLE_NA
SRR15309012	HMLE	ctrl		GSM5493347	SINGLE	3	1.5h	yes	GSE181237		GSE181237_3_ctrl_HMLE_NA
SRR15309014	HMLE	ctrl		GSM5493348	SINGLE	1	3h	yes	GSE181237		GSE181237_1_ctrl_HMLE_NA
SRR15309016	HMLE	ctrl		GSM5493349	SINGLE	2	3h	yes	GSE181237		GSE181237_2_ctrl_HMLE_NA
SRR15309018	HMLE	ctrl		GSM5493350	SINGLE	3	3h	yes	GSE181237		GSE181237_3_ctrl_HMLE_NA
SRR15309020	HMLE	ctrl		GSM5493351	SINGLE	1	6h	yes	GSE181237		GSE181237_1_ctrl_HMLE_NA
SRR15309024	HMLE	ctrl		GSM5493353	SINGLE	3	6h	yes	GSE181237		GSE181237_3_ctrl_HMLE_NA
SRR15309026	HMLE	RbMS3 expression		GSM5493354	SINGLE	1	0h	yes	GSE181237		GSE181237_1_RbMS3 expression_HMLE_NA
SRR15309028	HMLE	RbMS3 expression		GSM5493355	SINGLE	2	0h	yes	GSE181237		GSE181237_2_RbMS3 expression_HMLE_NA
SRR15309030	HMLE	RbMS3 expression		GSM5493356	SINGLE	3	0h	yes	GSE181237		GSE181237_3_RbMS3 expression_HMLE_NA
SRR15309032	HMLE	RbMS3 expression		GSM5493357	SINGLE	1	1.5h	yes	GSE181237		GSE181237_1_RbMS3 expression_HMLE_NA
SRR15309034	HMLE	RbMS3 expression		GSM5493358	SINGLE	2	1.5h	yes	GSE181237		GSE181237_2_RbMS3 expression_HMLE_NA
SRR15309042	HMLE	RbMS3 expression		GSM5493362	SINGLE	3	3h	yes	GSE181237		GSE181237_3_RbMS3 expression_HMLE_NA
SRR15309044	HMLE	RbMS3 expression		GSM5493363	SINGLE	1	6h	yes	GSE181237		GSE181237_1_RbMS3 expression_HMLE_NA
SRR15309046	HMLE	RbMS3 expression		GSM5493364	SINGLE	2	6h	yes	GSE181237		GSE181237_2_RbMS3 expression_HMLE_NA
SRR15309048	HMLE	RbMS3 expression		GSM5493365	SINGLE	3	6h	yes	GSE181237		GSE181237_3_RbMS3 expression_HMLE_NA
SRR1538756	HeLa	ctrl	ctrl	GSM1467406	SINGLE		0h	yes	GSE60191		GSE60191_NA_ctrl_HeLa_ctrl
SRR1538757	HeLa	ctrl	ctrl	GSM1467407	SINGLE		2h	yes	GSE60191		GSE60191_NA_ctrl_HeLa_ctrl
SRR1538758	HeLa	ctrl	ctrl	GSM1467408	SINGLE		4h	yes	GSE60191		GSE60191_NA_ctrl_HeLa_ctrl
SRR1538759	HeLa	ctrl	ctrl	GSM1467409	SINGLE		6h	yes	GSE60191		GSE60191_NA_ctrl_HeLa_ctrl
SRR1588602	HeLa	ctrl	ctrl	GSM1514008	SINGLE	2	0h	yes	GSE59626		GSE59626_2_ctrl_HeLa_ctrl
SRR1588603	HeLa	ctrl	ctrl	GSM1514009	SINGLE	2	1h	yes	GSE59626		GSE59626_2_ctrl_HeLa_ctrl
SRR1588604	HeLa	ctrl	ctrl	GSM1514010	SINGLE	2	2h	yes	GSE59626		GSE59626_2_ctrl_HeLa_ctrl
SRR1588605	HeLa	ctrl	ctrl	GSM1514011	SINGLE	2	4h	yes	GSE59626		GSE59626_2_ctrl_HeLa_ctrl
SRR1588607	HeLa	siTUT47	siTUT47	GSM1514013	SINGLE	2	1h	yes	GSE59626		GSE59626_2_siTUT47_HeLa_siTUT47
SRR1588608	HeLa	siTUT47	siTUT47	GSM1514014	SINGLE	2	2h	yes	GSE59626		GSE59626_2_siTUT47_HeLa_siTUT47
SRR1588609	HeLa	siTUT47	siTUT47	GSM1514015	SINGLE	2	4h	yes	GSE59626		GSE59626_2_siTUT47_HeLa_siTUT47
SRR15931158	HEK293T	ctrl		GSM5584858	PAIRED	1	0h	yes	GSE184349		GSE184349_1_ctrl_HEK293T_NA
SRR15931159	HEK293T	ctrl		GSM5584859	PAIRED	1	4h	yes	GSE184349		GSE184349_1_ctrl_HEK293T_NA
SRR15931160	HEK293T	ctrl		GSM5584860	PAIRED	1	8h	yes	GSE184349		GSE184349_1_ctrl_HEK293T_NA
SRR15931161	HEK293T	ctrl		GSM5584861	PAIRED	2	0h	yes	GSE184349		GSE184349_2_ctrl_HEK293T_NA
SRR15931162	HEK293T	ctrl		GSM5584862	PAIRED	2	4h	yes	GSE184349		GSE184349_2_ctrl_HEK293T_NA
SRR15931163	HEK293T	ctrl		GSM5584863	PAIRED	2	8h	yes	GSE184349		GSE184349_2_ctrl_HEK293T_NA
SRR16929081	HeLa	ctrl	ctrl	GSM5688443	SINGLE	1	0h		GSE188690,GSE188694		GSE188690,GSE188694_1_ctrl_HeLa_ctrl
SRR16929082	HeLa	ctrl	ctrl	GSM5688444	SINGLE	1	2h	yes	GSE188690,GSE188694		GSE188690,GSE188694_1_ctrl_HeLa_ctrl
SRR16929083	HeLa	ctrl	ctrl	GSM5688445	SINGLE	1	4h	yes	GSE188690,GSE188694		GSE188690,GSE188694_1_ctrl_HeLa_ctrl
SRR16929084	HeLa	ctrl	ctrl	GSM5688446	SINGLE	1	6h	yes	GSE188690,GSE188694		GSE188690,GSE188694_1_ctrl_HeLa_ctrl
SRR16929086	HeLa	RMD	RMD	GSM5688448	SINGLE	1	2h	yes	GSE188690,GSE188694		GSE188690,GSE188694_1_RMD_HeLa_RMD
SRR16929087	HeLa	RMD	RMD	GSM5688449	SINGLE	1	4h	yes	GSE188690,GSE188694		GSE188690,GSE188694_1_RMD_HeLa_RMD
SRR16929088	HeLa	RMD	RMD	GSM5688450	SINGLE	1	6h	yes	GSE188690,GSE188694		GSE188690,GSE188694_1_RMD_HeLa_RMD
SRR16929089	HeLa	C2	C2	GSM5688451	SINGLE	1	16h		GSE188690,GSE188694		GSE188690,GSE188694_1_C2_HeLa_C2
SRR16929092	HeLa	C2	C2	GSM5688453	SINGLE	1	4h	yes	GSE188690,GSE188694		GSE188690,GSE188694_1_C2_HeLa_C2
SRR16929097	HeLa	C2	C2	GSM5688458	SINGLE	1	6h	yes	GSE188690,GSE188694		GSE188690,GSE188694_1_C2_HeLa_C2
SRR16929098	HeLa	S140	S140	GSM5688459	SINGLE	1	16h		GSE188690,GSE188694		GSE188690,GSE188694_1_S140_HeLa_S140
SRR16929099	HeLa	S140	S140	GSM5688460	SINGLE	1	2h	yes	GSE188690,GSE188694		GSE188690,GSE188694_1_S140_HeLa_S140
SRR16929100	HeLa	S140	S140	GSM5688461	SINGLE	1	4h	yes	GSE188690,GSE188694		GSE188690,GSE188694_1_S140_HeLa_S140
SRR16929101	HeLa	S140	S140	GSM5688462	SINGLE	1	6h	yes	GSE188690,GSE188694		GSE188690,GSE188694_1_S140_HeLa_S140
SRR16929102	HeLa	S140	S140	GSM5688463	SINGLE	1	16h		GSE188690,GSE188694		GSE188690,GSE188694_1_S140_HeLa_S140
SRR16929104	HeLa	S140	S140	GSM5688465	SINGLE	1	4h	yes	GSE188690,GSE188694		GSE188690,GSE188694_1_S140_HeLa_S140
SRR16929105	HeLa	S140	S140	GSM5688466	SINGLE	1	6h	yes	GSE188690,GSE188694		GSE188690,GSE188694_1_S140_HeLa_S140
SRR16929106	HeLa	S181	DMSO	GSM5688467	SINGLE	1	0h		GSE188690,GSE188694		GSE188690,GSE188694_1_S181_HeLa_S181
SRR16929107	HeLa	S181	DMSO	GSM5688468	SINGLE	1	2h	yes	GSE188690,GSE188694		GSE188690,GSE188694_1_S181_HeLa_S181
SRR16929108	HeLa	S181	DMSO	GSM5688469	SINGLE	1	4h	yes	GSE188690,GSE188694		GSE188690,GSE188694_1_S181_HeLa_S181
SRR16929109	HeLa	S181	DMSO	GSM5688470	SINGLE	1	6h	yes	GSE188690,GSE188694		GSE188690,GSE188694_1_S181_HeLa_S181
SRR16929110	HeLa	S181	RMD	GSM5688471	SINGLE	1	0h		GSE188690,GSE188694		GSE188690,GSE188694_1_S181_HeLa_S181
SRR16929111	HeLa	S181	RMD	GSM5688472	SINGLE	1	2h	yes	GSE188690,GSE188694		GSE188690,GSE188694_1_S181_HeLa_S181
SRR16929112	HeLa	S181	RMD	GSM5688473	SINGLE	1	4h	yes	GSE188690,GSE188694		GSE188690,GSE188694_1_S181_HeLa_S181
SRR16929113	HeLa	S181	RMD	GSM5688474	SINGLE	1	6h	yes	GSE188690,GSE188694		GSE188690,GSE188694_1_S181_HeLa_S181
SRR17622368	HEK293	ctrl	GFP expression	GSM5819497	PAIRED	2	6h	yes	GSE193732		GSE193732_2_ctrl_HEK293_GFP expression
SRR17622370	HEK293	ctrl	GFP expression	GSM5819493	PAIRED	1	4h	yes	GSE193732		GSE193732_1_ctrl_HEK293_GFP expression
SRR17622372	HEK293	ctrl	GFP expression	GSM5819494	PAIRED	2	4h	yes	GSE193732		GSE193732_2_ctrl_HEK293_GFP expression
SRR17622373	HEK293	ctrl	GFP expression	GSM5819496	PAIRED	1	6h	yes	GSE193732		GSE193732_1_ctrl_HEK293_GFP expression
SRR17622375	HEK293	ctrl	GFP expression	GSM5819491	PAIRED	2	2h	yes	GSE193732		GSE193732_2_ctrl_HEK293_GFP expression
SRR17622376	HEK293	ctrl	GFP expression	GSM5819490	PAIRED	1	2h	yes	GSE193732		GSE193732_1_ctrl_HEK293_GFP expression
SRR22324431	U2OS	ctrl	ctrl	GSM6736811	PAIRED	2	8h	yes	GSE218222		GSE218222_2_ctrl_U2OS_ctrl
SRR22324432	U2OS	ctrl	ctrl	GSM6736810	PAIRED	1	8h	yes	GSE218222		GSE218222_1_ctrl_U2OS_ctrl
SRR22324433	U2OS	ctrl	ctrl	GSM6736809	PAIRED	2	4h	yes	GSE218222		GSE218222_2_ctrl_U2OS_ctrl
SRR22324434	U2OS	ctrl	ctrl	GSM6736808	PAIRED	1	4h	yes	GSE218222		GSE218222_1_ctrl_U2OS_ctrl
SRR22324435	U2OS	ctrl	ctrl	GSM6736807	PAIRED	2	0h	yes	GSE218222		GSE218222_2_ctrl_U2OS_ctrl
SRR22324436	U2OS	ctrl	ctrl	GSM6736806	PAIRED	1	0h	yes	GSE218222		GSE218222_1_ctrl_U2OS_ctrl
SRR22324437	U2OS	sgQKI+QKI7-{delta}KH	sgQKI+QKI7-{delta}KH	GSM6736805	PAIRED	2	8h	yes	GSE218222		GSE218222_2_sgQKI+QKI7-{delta}KH_U2OS_sgQKI+QKI7-{delta}KH
SRR22324438	U2OS	sgQKI+QKI7-{delta}KH	sgQKI+QKI7-{delta}KH	GSM6736804	PAIRED	1	8h	yes	GSE218222		GSE218222_1_sgQKI+QKI7-{delta}KH_U2OS_sgQKI+QKI7-{delta}KH
SRR22324439	U2OS	sgQKI+QKI7-{delta}KH	sgQKI+QKI7-{delta}KH	GSM6736803	PAIRED	2	4h	yes	GSE218222		GSE218222_2_sgQKI+QKI7-{delta}KH_U2OS_sgQKI+QKI7-{delta}KH
SRR22324440	U2OS	sgQKI+QKI7-{delta}KH	sgQKI+QKI7-{delta}KH	GSM6736802	PAIRED	1	4h	yes	GSE218222		GSE218222_1_sgQKI+QKI7-{delta}KH_U2OS_sgQKI+QKI7-{delta}KH
SRR22324441	U2OS	sgQKI+QKI7-{delta}KH	sgQKI+QKI7-{delta}KH	GSM6736801	PAIRED	2	0h	yes	GSE218222		GSE218222_2_sgQKI+QKI7-{delta}KH_U2OS_sgQKI+QKI7-{delta}KH
SRR22324442	U2OS	sgQKI+QKI7-{delta}KH	sgQKI+QKI7-{delta}KH	GSM6736800	PAIRED	1	0h	yes	GSE218222		GSE218222_1_sgQKI+QKI7-{delta}KH_U2OS_sgQKI+QKI7-{delta}KH
SRR24108390	PANC-1	ctrl		GSM7157263	PAIRED	2	8h	yes	GSE229230		GSE229230_2_ctrl_PANC-1_NA
SRR24108391	PANC-1	ctrl		GSM7157262	PAIRED	1	8h	yes	GSE229230		GSE229230_1_ctrl_PANC-1_NA
SRR24108392	PANC-1	ctrl		GSM7157261	PAIRED	2	6h	yes	GSE229230		GSE229230_2_ctrl_PANC-1_NA
SRR24108393	PANC-1	ctrl		GSM7157260	PAIRED	1	6h	yes	GSE229230		GSE229230_1_ctrl_PANC-1_NA
SRR24108394	PANC-1	ctrl		GSM7157259	PAIRED	2	4h	yes	GSE229230		GSE229230_2_ctrl_PANC-1_NA
SRR24108395	PANC-1	ctrl		GSM7157258	PAIRED	1	4h	yes	GSE229230		GSE229230_1_ctrl_PANC-1_NA
SRR24108396	PANC-1	ctrl		GSM7157257	PAIRED	2	2h	yes	GSE229230		GSE229230_2_ctrl_PANC-1_NA
SRR24108397	PANC-1	ctrl		GSM7157256	PAIRED	1	2h	yes	GSE229230		GSE229230_1_ctrl_PANC-1_NA
SRR24108398	PANC-1	ctrl		GSM7157255	PAIRED	2	0h	yes	GSE229230		GSE229230_2_ctrl_PANC-1_NA
SRR24108399	PANC-1	ctrl		GSM7157254	PAIRED	1	0h	yes	GSE229230		GSE229230_1_ctrl_PANC-1_NA
SRR24108400	PANC-1	KHSRP knockout		GSM7157253	PAIRED	2	8h	yes	GSE229230		GSE229230_2_KHSRP knockout_PANC-1_NA
SRR24108401	PANC-1	KHSRP knockout		GSM7157252	PAIRED	1	8h	yes	GSE229230		GSE229230_1_KHSRP knockout_PANC-1_NA
SRR24108402	PANC-1	KHSRP knockout		GSM7157251	PAIRED	2	6h	yes	GSE229230		GSE229230_2_KHSRP knockout_PANC-1_NA
SRR24108403	PANC-1	KHSRP knockout		GSM7157250	PAIRED	1	6h	yes	GSE229230		GSE229230_1_KHSRP knockout_PANC-1_NA
SRR24108404	PANC-1	KHSRP knockout		GSM7157249	PAIRED	2	4h	yes	GSE229230		GSE229230_2_KHSRP knockout_PANC-1_NA
SRR24108405	PANC-1	KHSRP knockout		GSM7157248	PAIRED	1	4h	yes	GSE229230		GSE229230_1_KHSRP knockout_PANC-1_NA
SRR24108406	PANC-1	KHSRP knockout		GSM7157247	PAIRED	2	2h	yes	GSE229230		GSE229230_2_KHSRP knockout_PANC-1_NA
SRR24108407	PANC-1	KHSRP knockout		GSM7157246	PAIRED	1	2h	yes	GSE229230		GSE229230_1_KHSRP knockout_PANC-1_NA
SRR24108408	PANC-1	KHSRP knockout		GSM7157245	PAIRED	2	0h	yes	GSE229230		GSE229230_2_KHSRP knockout_PANC-1_NA
SRR24108409	PANC-1	KHSRP knockout		GSM7157244	PAIRED	1	0h	yes	GSE229230		GSE229230_1_KHSRP knockout_PANC-1_NA
SRR24412617	HeLa	ctrl	DMSO	GSM7287612	SINGLE	2	4h	yes	GSE231519		GSE231519_NA_ctrl_HeLa_DMSO
SRR24412618	HeLa	ctrl	DMSO	GSM7287611	SINGLE	2	2h	yes	GSE231519		GSE231519_NA_ctrl_HeLa_DMSO
SRR24412619	HeLa	ctrl	DMSO	GSM7287610	SINGLE	2	1h	yes	GSE231519		GSE231519_NA_ctrl_HeLa_DMSO
SRR24412620	HeLa	ctrl	DMSO	GSM7287609	SINGLE	2	0h	yes	GSE231519		GSE231519_NA_ctrl_HeLa_DMSO
SRR24412621	HeLa	ctrl	DMSO	GSM7287608	SINGLE	1	4h	yes	GSE231519		GSE231519_NA_ctrl_HeLa_DMSO
SRR24412622	HeLa	ctrl	DMSO	GSM7287607	SINGLE	1	2h	yes	GSE231519		GSE231519_NA_ctrl_HeLa_DMSO
SRR24412623	HeLa	ctrl	DMSO	GSM7287606	SINGLE	1	1h	yes	GSE231519		GSE231519_NA_ctrl_HeLa_DMSO
SRR24412624	HeLa	ctrl	DMSO	GSM7287605	SINGLE	1	0h	yes	GSE231519		GSE231519_NA_ctrl_HeLa_DMSO
SRR24412625	HeLa	ANI	ANI	GSM7287604	SINGLE		4h	yes	GSE231519		GSE231519_NA_ANI_HeLa_ANI
SRR24412626	HeLa	ANI	ANI	GSM7287603	SINGLE		2h	yes	GSE231519		GSE231519_NA_ANI_HeLa_ANI
SRR24412627	HeLa	ANI	ANI	GSM7287602	SINGLE		4h	yes	GSE231519		GSE231519_NA_ANI_HeLa_ANI
SRR27239192	293T	ctrl		GSM7976193	PAIRED		6h	yes	GSE249786		GSE249786_NA_ctrl_293T_
SRR27239193	293T	ctrl		GSM7976192	PAIRED		2h	yes	GSE249786		GSE249786_NA_ctrl_293T_
SRR27239194	293T	ctrl		GSM7976191	PAIRED		0h	yes	GSE249786		GSE249786_NA_ctrl_293T_
SRR29890110	HEK293	ctrl	DMSO	GSM8408035	PAIRED	1	0h	yes	GSE272629		GSE272629_1_ctrl_HEK293_DMSO
SRR29890111	HEK293	ctrl	DMSO	GSM8408034	PAIRED	2	0h	yes	GSE272629		GSE272629_2_ctrl_HEK293_DMSO
SRR29890112	HEK293	ctrl	DMSO	GSM8408033	PAIRED	2	6h	yes	GSE272629		GSE272629_2_ctrl_HEK293_DMSO
SRR29890113	HEK293	ctrl	DMSO	GSM8408032	PAIRED	1	6h	yes	GSE272629		GSE272629_1_ctrl_HEK293_DMSO
SRR29890114	HEK293	ctrl	DMSO	GSM8408031	PAIRED	2	3h	yes	GSE272629		GSE272629_2_ctrl_HEK293_DMSO
SRR29890115	HEK293	ctrl	DMSO	GSM8408030	PAIRED	1	3h	yes	GSE272629		GSE272629_1_ctrl_HEK293_DMSO
SRR29890116	HEK293	ctrl	DMSO	GSM8408029	PAIRED	2	0h	yes	GSE272629		GSE272629_2_ctrl_HEK293_DMSO
SRR29890117	HEK293	ctrl	DMSO	GSM8408028	PAIRED	1	0h	yes	GSE272629		GSE272629_1_ctrl_HEK293_DMSO
SRR29916163	HeLa	ctrl		GSM8410748	SINGLE	3	8h	yes	GSE272780		GSE272780_3_ctrl_HeLa_NA
SRR29916164	HeLa	ctrl		GSM8410747	SINGLE	2	8h	yes	GSE272780		GSE272780_2_ctrl_HeLa_NA
SRR29916165	HeLa	ctrl		GSM8410746	SINGLE	1	8h	yes	GSE272780		GSE272780_1_ctrl_HeLa_NA
SRR29916166	HeLa	ctrl		GSM8410745	SINGLE	3	6h	yes	GSE272780		GSE272780_3_ctrl_HeLa_NA
SRR29916167	HeLa	ctrl		GSM8410744	SINGLE	2	6h	yes	GSE272780		GSE272780_2_ctrl_HeLa_NA
SRR29916168	HeLa	ctrl		GSM8410743	SINGLE	1	6h	yes	GSE272780		GSE272780_1_ctrl_HeLa_NA
SRR29916169	HeLa	ctrl		GSM8410742	SINGLE	3	4h	yes	GSE272780		GSE272780_3_ctrl_HeLa_NA
SRR29916170	HeLa	ctrl		GSM8410741	SINGLE	2	4h	yes	GSE272780		GSE272780_2_ctrl_HeLa_NA
SRR29916171	HeLa	ctrl		GSM8410740	SINGLE	1	4h	yes	GSE272780		GSE272780_1_ctrl_HeLa_NA
SRR4191706	U2OS	ctrl	ctrl	GSM2305455	PAIRED		0.5h	yes	GSE86549		GSE86549_NA_ctrl_U2OS_ctrl
SRR4191707	U2OS	ctrl	ctrl	GSM2305456	PAIRED		1h	yes	GSE86549		GSE86549_NA_ctrl_U2OS_ctrl
SRR4191708	U2OS	ctrl	ctrl	GSM2305457	PAIRED		2h	yes	GSE86549		GSE86549_NA_ctrl_U2OS_ctrl
SRR4191709	U2OS	ctrl	ctrl	GSM2305458	PAIRED		4h	yes	GSE86549		GSE86549_NA_ctrl_U2OS_ctrl
SRR4191710	U2OS	ctrl	ctrl	GSM2305459	PAIRED		6h	yes	GSE86549		GSE86549_NA_ctrl_U2OS_ctrl
SRR4191711	U2OS	Long isoform kd	Long isoform kd	GSM2305460	PAIRED		0h		GSE86549		GSE86549_NA_Long isoform kd_U2OS_Long isoform kd
SRR4191712	U2OS	Long isoform kd	Long isoform kd	GSM2305461	PAIRED		0.5h	yes	GSE86549		GSE86549_NA_Long isoform kd_U2OS_Long isoform kd
SRR4191713	U2OS	Long isoform kd	Long isoform kd	GSM2305462	PAIRED		1h	yes	GSE86549		GSE86549_NA_Long isoform kd_U2OS_Long isoform kd
SRR4191714	U2OS	Long isoform kd	Long isoform kd	GSM2305463	PAIRED		2h	yes	GSE86549		GSE86549_NA_Long isoform kd_U2OS_Long isoform kd
SRR4191715	U2OS	Long isoform kd	Long isoform kd	GSM2305464	PAIRED		4h	yes	GSE86549		GSE86549_NA_Long isoform kd_U2OS_Long isoform kd
SRR4191716	U2OS	Long isoform kd	Long isoform kd	GSM2305465	PAIRED		6h	yes	GSE86549		GSE86549_NA_Long isoform kd_U2OS_Long isoform kd
SRR4191724	U2OS	Short isoform kd	Short isoform kd	GSM2305473	PAIRED		0.5h	yes	GSE86549		GSE86549_NA_Short isoform kd_U2OS_Short isoform kd
SRR4191725	U2OS	Short isoform kd	Short isoform kd	GSM2305474	PAIRED		1h	yes	GSE86549		GSE86549_NA_Short isoform kd_U2OS_Short isoform kd
SRR4191727	U2OS	Short isoform kd	Short isoform kd	GSM2305476	PAIRED		4h	yes	GSE86549		GSE86549_NA_Short isoform kd_U2OS_Short isoform kd
SRR5634123	HEK293	ctrl		GSM2645407	SINGLE	1	1 hr	yes	GSE99517		GSE99517_1_ctrl_HEK293_NA
SRR5634124	HEK293	ctrl		GSM2645408	SINGLE	1	2 hr	yes	GSE99517		GSE99517_1_ctrl_HEK293_NA
SRR5634125	HEK293	ctrl		GSM2645409	SINGLE	1	4 hr	yes	GSE99517		GSE99517_1_ctrl_HEK293_NA
SRR5634126	HEK293	ctrl		GSM2645410	SINGLE	1	8 hr	yes	GSE99517		GSE99517_1_ctrl_HEK293_NA
SRR5634127	HEK293	ctrl		GSM2645411	SINGLE	1	12 hr	yes	GSE99517		GSE99517_1_ctrl_HEK293_NA
SRR5634128	HEK293	ctrl		GSM2645412	SINGLE	1	24 hr	yes	GSE99517		GSE99517_1_ctrl_HEK293_NA
SRR5634130	HEK293	ctrl		GSM2645414	SINGLE	2	1 hr	yes	GSE99517		GSE99517_2_ctrl_HEK293_NA
SRR5634132	HEK293	ctrl		GSM2645416	SINGLE	2	4 hr	yes	GSE99517		GSE99517_2_ctrl_HEK293_NA
SRR5634133	HEK293	ctrl		GSM2645417	SINGLE	2	8 hr	yes	GSE99517		GSE99517_2_ctrl_HEK293_NA
SRR5634134	HEK293	ctrl		GSM2645418	SINGLE	2	12 hr	yes	GSE99517		GSE99517_2_ctrl_HEK293_NA
SRR5634135	HEK293	ctrl		GSM2645419	SINGLE	2	24 hr	yes	GSE99517		GSE99517_2_ctrl_HEK293_NA
SRR6039377	CCRF-CEM	ctrl	ctrl	GSM2785169	SINGLE	1	0h	yes	GSE103872		GSE103872_1_ctrl_CCRF-CEM_ctrl
SRR6039378	CCRF-CEM	ctrl	ctrl	GSM2785170	SINGLE	2	0h	yes	GSE103872		GSE103872_2_ctrl_CCRF-CEM_ctrl
SRR6039383	CCRF-CEM	CNOT3 knockdown with si328	CNOT3 knockdown with si328	GSM2785175	SINGLE	1	0h	yes	GSE103872		GSE103872_1_CNOT3 knockdown with si328_CCRF-CEM_CNOT3 knockdown with si328
SRR6039384	CCRF-CEM	CNOT3 knockdown with si328	CNOT3 knockdown with si328	GSM2785176	SINGLE	2	0h	yes	GSE103872		GSE103872_2_CNOT3 knockdown with si328_CCRF-CEM_CNOT3 knockdown with si328
SRR6039386	CCRF-CEM	ctrl	ctrl	GSM2785178	SINGLE	1	2h	yes	GSE103872		GSE103872_1_ctrl_CCRF-CEM_ctrl
SRR6039387	CCRF-CEM	ctrl	ctrl	GSM2785179	SINGLE	2	2h	yes	GSE103872		GSE103872_2_ctrl_CCRF-CEM_ctrl
SRR6039392	CCRF-CEM	CNOT3 knockdown with si328	CNOT3 knockdown with si328	GSM2785184	SINGLE	1	2h	yes	GSE103872		GSE103872_1_CNOT3 knockdown with si328_CCRF-CEM_CNOT3 knockdown with si328
SRR6039393	CCRF-CEM	CNOT3 knockdown with si328	CNOT3 knockdown with si328	GSM2785185	SINGLE	2	2h	yes	GSE103872		GSE103872_2_CNOT3 knockdown with si328_CCRF-CEM_CNOT3 knockdown with si328
SRR6039395	CCRF-CEM	ctrl	ctrl	GSM2785187	SINGLE	1	4h	yes	GSE103872		GSE103872_1_ctrl_CCRF-CEM_ctrl
SRR6039396	CCRF-CEM	ctrl	ctrl	GSM2785188	SINGLE	2	4h	yes	GSE103872		GSE103872_2_ctrl_CCRF-CEM_ctrl
SRR6039401	CCRF-CEM	CNOT3 knockdown with si328	CNOT3 knockdown with si328	GSM2785193	SINGLE	1	4h	yes	GSE103872		GSE103872_1_CNOT3 knockdown with si328_CCRF-CEM_CNOT3 knockdown with si328
SRR6039402	CCRF-CEM	CNOT3 knockdown with si328	CNOT3 knockdown with si328	GSM2785194	SINGLE	2	4h	yes	GSE103872		GSE103872_2_CNOT3 knockdown with si328_CCRF-CEM_CNOT3 knockdown with si328
SRR7535570	HeLa	ShML3-2	ShML3-2	GSM3290693	SINGLE	1	0h		GSE117299		GSE117299_1_ShML3-2_HeLa_ShML3-2
SRR7535571	HeLa	ShML3-3	ShML3-3	GSM3290694	SINGLE	1	0h		GSE117299		GSE117299_1_ShML3-3_HeLa_ShML3-3
SRR7535578	HeLa	ShML3-2	ShML3-2	GSM3290701	SINGLE	1	4h	yes	GSE117299		GSE117299_1_ShML3-2_HeLa_ShML3-2
SRR7535579	HeLa	ShML3-3	ShML3-3	GSM3290702	SINGLE	1	4h	yes	GSE117299		GSE117299_1_ShML3-3_HeLa_ShML3-3
SRR7535582	HeLa	ShML3-2	ShML3-2	GSM3290705	SINGLE	1	6h	yes	GSE117299		GSE117299_1_ShML3-2_HeLa_ShML3-2
SRR7535583	HeLa	ShML3-3	ShML3-3	GSM3290706	SINGLE	1	6h	yes	GSE117299		GSE117299_1_ShML3-3_HeLa_ShML3-3
SRR8131652	HepG2	shSETD2	shSETD2	GSM3450385	SINGLE	1	0h		GSE121949		GSE121949_1_shSETD2_HepG2_shSETD2
SRR8131654	HepG2	shSETD2	shSETD2	GSM3450387	SINGLE	1	1h	yes	GSE121949		GSE121949_1_shSETD2_HepG2_shSETD2
SRR8131655	HepG2	shSETD2	shSETD2	GSM3450388	SINGLE	2	1h	yes	GSE121949		GSE121949_2_shSETD2_HepG2_shSETD2
SRR8131656	HepG2	shSETD2	shSETD2	GSM3450389	SINGLE	1	3h	yes	GSE121949		GSE121949_1_shSETD2_HepG2_shSETD2
SRR8131657	HepG2	shSETD2	shSETD2	GSM3450390	SINGLE	2	3h	yes	GSE121949		GSE121949_2_shSETD2_HepG2_shSETD2
SRR8131658	HepG2	shSETD2	shSETD2	GSM3450391	SINGLE	1	6h	yes	GSE121949		GSE121949_1_shSETD2_HepG2_shSETD2
SRR8131659	HepG2	shSETD2	shSETD2	GSM3450392	SINGLE	2	6h	yes	GSE121949		GSE121949_2_shSETD2_HepG2_shSETD2
SRR8131660	HepG2	shMETTl14	shMETTl14	GSM3450393	SINGLE	1	0h		GSE121949		GSE121949_1_shMETTl14_HepG2_shMETTl14
SRR8131662	HepG2	shMETTl14	shMETTl14	GSM3450395	SINGLE	1	1h	yes	GSE121949		GSE121949_1_shMETTl14_HepG2_shMETTl14
SRR8131664	HepG2	shMETTl14	shMETTl14	GSM3450397	SINGLE	1	3h	yes	GSE121949		GSE121949_1_shMETTl14_HepG2_shMETTl14
SRR944669	HeLa	ctrl	ctrl	GSM1197628	SINGLE	2	0h	yes	GSE49339		GSE49339_2_ctrl_HeLa_ctrl
SRR944670	HeLa	ctrl	ctrl	GSM1197629	SINGLE	2	3h	yes	GSE49339		GSE49339_2_ctrl_HeLa_ctrl
SRR944671	HeLa	ctrl	ctrl	GSM1197630	SINGLE	2	6h	yes	GSE49339		GSE49339_2_ctrl_HeLa_ctrl
SRR944672	HeLa	SiYTHDF2	SiYTHDF2	GSM1197631	SINGLE	2	0h	yes	GSE49339		GSE49339_2_SiYTHDF2_HeLa_SiYTHDF2
SRR944673	HeLa	SiYTHDF2	SiYTHDF2	GSM1197632	SINGLE	2	3h	yes	GSE49339		GSE49339_2_SiYTHDF2_HeLa_SiYTHDF2
SRR944674	HeLa	SiYTHDF2	SiYTHDF2	GSM1197633	SINGLE	2	6h	yes	GSE49339		GSE49339_2_SiYTHDF2_HeLa_SiYTHDF2
SRR5062105	HepG2	ctrl	ctrl	GSM2410384	SINGLE	1	0h		GSE90684		GSE90684_1_ctrl_HepG2_ctrl
SRR5062106	HepG2	ctrl	ctrl	GSM2410385	SINGLE	2	0h		GSE90684		GSE90684_2_ctrl_HepG2_ctrl
SRR5062107	HepG2	ctrl	ctrl	GSM2410386	SINGLE	1	1h	yes	GSE90684		GSE90684_1_ctrl_HepG2_ctrl
SRR5062108	HepG2	ctrl	ctrl	GSM2410387	SINGLE	2	1h	yes	GSE90684		GSE90684_2_ctrl_HepG2_ctrl
SRR5062109	HepG2	ctrl	ctrl	GSM2410388	SINGLE	1	3h	yes	GSE90684		GSE90684_1_ctrl_HepG2_ctrl
SRR5062110	HepG2	ctrl	ctrl	GSM2410389	SINGLE	2	3h	yes	GSE90684		GSE90684_2_ctrl_HepG2_ctrl
SRR5062111	HepG2	ctrl	ctrl	GSM2410390	SINGLE	1	6h	yes	GSE90684		GSE90684_1_ctrl_HepG2_ctrl
SRR5062112	HepG2	ctrl	ctrl	GSM2410391	SINGLE	2	6h	yes	GSE90684		GSE90684_2_ctrl_HepG2_ctrl
SRR5062113	HepG2	shIGF2BP1	shIGF2BP1	GSM2410392	SINGLE	1	0h		GSE90684		GSE90684_1_shIGF2BP1_HepG2_shIGF2BP1
SRR5062114	HepG2	shIGF2BP1	shIGF2BP1	GSM2410393	SINGLE	2	0h		GSE90684		GSE90684_2_shIGF2BP1_HepG2_shIGF2BP1
SRR5062115	HepG2	shIGF2BP1	shIGF2BP1	GSM2410394	SINGLE	1	1h	yes	GSE90684		GSE90684_1_shIGF2BP1_HepG2_shIGF2BP1
SRR5062116	HepG2	shIGF2BP1	shIGF2BP1	GSM2410395	SINGLE	2	1h	yes	GSE90684		GSE90684_2_shIGF2BP1_HepG2_shIGF2BP1
SRR5062117	HepG2	shIGF2BP1	shIGF2BP1	GSM2410396	SINGLE	1	3h	yes	GSE90684		GSE90684_1_shIGF2BP1_HepG2_shIGF2BP1
SRR5062118	HepG2	shIGF2BP1	shIGF2BP1	GSM2410397	SINGLE	2	3h	yes	GSE90684		GSE90684_2_shIGF2BP1_HepG2_shIGF2BP1
SRR5062119	HepG2	shIGF2BP1	shIGF2BP1	GSM2410398	SINGLE	1	6h	yes	GSE90684		GSE90684_1_shIGF2BP1_HepG2_shIGF2BP1
SRR5062120	HepG2	shIGF2BP1	shIGF2BP1	GSM2410399	SINGLE	2	6h	yes	GSE90684		GSE90684_2_shIGF2BP1_HepG2_shIGF2BP1
SRR5062121	HepG2	shIGF2BP3	shIGF2BP3	GSM2410400	SINGLE	1	0h		GSE90684		GSE90684_1_shIGF2BP3_HepG2_shIGF2BP3
SRR5062122	HepG2	shIGF2BP3	shIGF2BP3	GSM2410401	SINGLE	2	0h		GSE90684		GSE90684_2_shIGF2BP3_HepG2_shIGF2BP3
SRR5062123	HepG2	shIGF2BP3	shIGF2BP3	GSM2410402	SINGLE	1	1h	yes	GSE90684		GSE90684_1_shIGF2BP3_HepG2_shIGF2BP3
SRR5062124	HepG2	shIGF2BP3	shIGF2BP3	GSM2410403	SINGLE	2	1h	yes	GSE90684		GSE90684_2_shIGF2BP3_HepG2_shIGF2BP3
SRR5062125	HepG2	shIGF2BP3	shIGF2BP3	GSM2410404	SINGLE	1	3h	yes	GSE90684		GSE90684_1_shIGF2BP3_HepG2_shIGF2BP3
SRR5062126	HepG2	shIGF2BP3	shIGF2BP3	GSM2410405	SINGLE	2	3h	yes	GSE90684		GSE90684_2_shIGF2BP3_HepG2_shIGF2BP3
SRR5062127	HepG2	shIGF2BP3	shIGF2BP3	GSM2410406	SINGLE	1	6h	yes	GSE90684		GSE90684_1_shIGF2BP3_HepG2_shIGF2BP3
SRR5062128	HepG2	shIGF2BP3	shIGF2BP3	GSM2410407	SINGLE	2	6h	yes	GSE90684		GSE90684_2_shIGF2BP3_HepG2_shIGF2BP3
SRR3153311	NPC	ctrl	ctrl	GSM2056814	SINGLE	1	0h	yes	GSE77704		GSE77704_1_ctrl_NPC_ctrl
SRR3153316	NPC	TAF15	TAF15	GSM2056819	SINGLE	1	0.25h	yes	GSE77704		GSE77704_1_TAF15_NPC_TAF15
SRR3153317	NPC	ctrl	ctrl	GSM2056820	SINGLE	1	1h	yes	GSE77704		GSE77704_1_ctrl_NPC_ctrl
SRR3153312	NPC	FUS	FUS	GSM2056815	SINGLE	1	0h	yes	GSE77704		GSE77704_1_FUS_NPC_FUS
SRR3153313	NPC	TAF15	TAF15	GSM2056816	SINGLE	1	0h	yes	GSE77704		GSE77704_1_TAF15_NPC_TAF15
SRR3153314	NPC	ctrl	ctrl	GSM2056817	SINGLE	1	0.25h	yes	GSE77704		GSE77704_1_ctrl_NPC_ctrl
SRR3153315	NPC	FUS	FUS	GSM2056818	SINGLE	1	0.25h	yes	GSE77704		GSE77704_1_FUS_NPC_FUS
SRR3153318	NPC	FUS	FUS	GSM2056821	SINGLE	1	1h	yes	GSE77704		GSE77704_1_FUS_NPC_FUS
SRR3153319	NPC	TAF15	TAF15	GSM2056822	SINGLE	1	1h	yes	GSE77704		GSE77704_1_TAF15_NPC_TAF15
SRR3153320	NPC	ctrl	ctrl	GSM2056823	SINGLE	1	2h	yes	GSE77704		GSE77704_1_ctrl_NPC_ctrl
SRR3153321	NPC	FUS	FUS	GSM2056824	SINGLE	1	2h	yes	GSE77704		GSE77704_1_FUS_NPC_FUS
SRR3153322	NPC	TAF15	TAF15	GSM2056825	SINGLE	1	2h	yes	GSE77704		GSE77704_1_TAF15_NPC_TAF15
SRR3153323	NPC	ctrl	ctrl	GSM2056826	SINGLE	1	0.5h	yes	GSE77704		GSE77704_1_ctrl_NPC_ctrl
SRR3153324	NPC	FUS	FUS	GSM2056827	SINGLE	1	0.5h	yes	GSE77704		GSE77704_1_FUS_NPC_FUS
SRR3153325	NPC	TAF15	TAF15	GSM2056828	SINGLE	1	0.5h	yes	GSE77704		GSE77704_1_TAF15_NPC_TAF15
SRR3153326	NPC	ctrl	ctrl	GSM2056829	SINGLE	1	4h	yes	GSE77704		GSE77704_1_ctrl_NPC_ctrl
SRR3153327	NPC	FUS	FUS	GSM2056830	SINGLE	1	4h	yes	GSE77704		GSE77704_1_FUS_NPC_FUS
SRR3153328	NPC	TAF15	TAF15	GSM2056831	SINGLE	1	4h	yes	GSE77704		GSE77704_1_TAF15_NPC_TAF15
SRR2016221	HEK 293	ctrl	ctrl	GSM1677099	SINGLE	1	0h		GSE68611		GSE68611_1_ctrl_HEK 293_ctrl
SRR2016222	HEK 293	ctrl	ctrl	GSM1677100	SINGLE	1	1h	yes	GSE68611		GSE68611_1_ctrl_HEK 293_ctrl
SRR2016223	HEK 293	ctrl	ctrl	GSM1677101	SINGLE	1	2h	yes	GSE68611		GSE68611_1_ctrl_HEK 293_ctrl
SRR2016224	HEK 293	ctrl	ctrl	GSM1677102	SINGLE	2	0h		GSE68611		GSE68611_2_ctrl_HEK 293_ctrl
SRR2016225	HEK 293	ctrl	ctrl	GSM1677103	SINGLE	2	1h	yes	GSE68611		GSE68611_2_ctrl_HEK 293_ctrl
SRR2016226	HEK 293	ctrl	ctrl	GSM1677104	SINGLE	2	2h	yes	GSE68611		GSE68611_2_ctrl_HEK 293_ctrl
SRR18150744	Tcell	ctrl	ctrl	GSM5918563	PAIRED	3	2h	yes	GSE197495		GSE197495_3_ctrl_Tcell_ctrl
SRR18150745	Tcell	ctrl	ctrl	GSM5918562	PAIRED	2	2h	yes	GSE197495		GSE197495_2_ctrl_Tcell_ctrl
SRR18150746	Tcell	ctrl	ctrl	GSM5918561	PAIRED	1	2h	yes	GSE197495		GSE197495_1_ctrl_Tcell_ctrl
SRR18150747	Tcell	ctrl	ctrl	GSM5918560	PAIRED	3	1h	yes	GSE197495		GSE197495_3_ctrl_Tcell_ctrl
SRR18150748	Tcell	ctrl	ctrl	GSM5918559	PAIRED	2	1h	yes	GSE197495		GSE197495_2_ctrl_Tcell_ctrl
SRR18150755	Tcell	ctrl	ctrl	GSM5918552	PAIRED	1	0h	yes	GSE197495		GSE197495_1_ctrl_Tcell_ctrl
SRR18150756	C4-2	YTHDF2 knockdown	YTHDF2 knockdown	GSM5918551	PAIRED	1	2h	yes	GSE197495		GSE197495_1_YTHDF2 knockdown_C4-2_YTHDF2 knockdown
SRR18150757	C4-2	YTHDF2 knockdown	YTHDF2 knockdown	GSM5918550	PAIRED	1	1h	yes	GSE197495		GSE197495_1_YTHDF2 knockdown_C4-2_YTHDF2 knockdown
SRR18150758	C4-2	YTHDF2 knockdown	YTHDF2 knockdown	GSM5918549	PAIRED	1	0.25h	yes	GSE197495		GSE197495_1_YTHDF2 knockdown_C4-2_YTHDF2 knockdown
SRR18150759	C4-2	YTHDF2 knockdown	YTHDF2 knockdown	GSM5918548	PAIRED	1	0h	yes	GSE197495		GSE197495_1_YTHDF2 knockdown_C4-2_YTHDF2 knockdown
SRR18150760	C4-2	METTL3 knockdown	METTL3 knockdown	GSM5918547	PAIRED	1	2h	yes	GSE197495		GSE197495_1_METTL3 knockdown_C4-2_METTL3 knockdown
SRR18150761	C4-2	METTL3 knockdown	METTL3 knockdown	GSM5918546	PAIRED	1	1h	yes	GSE197495		GSE197495_1_METTL3 knockdown_C4-2_METTL3 knockdown
SRR18150762	C4-2	METTL3 knockdown	METTL3 knockdown	GSM5918545	PAIRED	1	0.25h	yes	GSE197495		GSE197495_1_METTL3 knockdown_C4-2_METTL3 knockdown
SRR18150770	C4-2	ctrl	ctrl	GSM5918537	PAIRED	2	0.25h	yes	GSE197495		GSE197495_2_ctrl_C4-2_ctrl
SRR18150749	Tcell	ctrl	ctrl	GSM5918558	PAIRED	1	1h	yes	GSE197495		GSE197495_1_ctrl_Tcell_ctrl
SRR18150750	Tcell	ctrl	ctrl	GSM5918557	PAIRED	3	0.25h	yes	GSE197495		GSE197495_3_ctrl_Tcell_ctrl
SRR18150751	Tcell	ctrl	ctrl	GSM5918556	PAIRED	2	0.25h	yes	GSE197495		GSE197495_2_ctrl_Tcell_ctrl
SRR18150752	Tcell	ctrl	ctrl	GSM5918555	PAIRED	1	0.25h	yes	GSE197495		GSE197495_1_ctrl_Tcell_ctrl
SRR18150753	Tcell	ctrl	ctrl	GSM5918554	PAIRED	3	0h	yes	GSE197495		GSE197495_3_ctrl_Tcell_ctrl
SRR18150754	Tcell	ctrl	ctrl	GSM5918553	PAIRED	2	0h	yes	GSE197495		GSE197495_2_ctrl_Tcell_ctrl
SRR18150763	C4-2	METTL3 knockdown	METTL3 knockdown	GSM5918544	PAIRED	1	0h	yes	GSE197495		GSE197495_1_METTL3 knockdown_C4-2_METTL3 knockdown
SRR18150764	C4-2	ctrl	ctrl	GSM5918543	PAIRED	1	2h	yes	GSE197495		GSE197495_1_ctrl_C4-2_ctrl
SRR18150765	C4-2	ctrl	ctrl	GSM5918542	PAIRED	1	1h	yes	GSE197495		GSE197495_1_ctrl_C4-2_ctrl
SRR18150766	C4-2	ctrl	ctrl	GSM5918541	PAIRED	1	0.25h	yes	GSE197495		GSE197495_1_ctrl_C4-2_ctrl
SRR18150767	C4-2	ctrl	ctrl	GSM5918540	PAIRED	1	0h	yes	GSE197495		GSE197495_1_ctrl_C4-2_ctrl
SRR18150768	C4-2	ctrl	ctrl	GSM5918539	PAIRED	2	2h	yes	GSE197495		GSE197495_2_ctrl_C4-2_ctrl
SRR18150769	C4-2	ctrl	ctrl	GSM5918538	PAIRED	2	1h	yes	GSE197495		GSE197495_2_ctrl_C4-2_ctrl
SRR18150771	C4-2	ctrl	ctrl	GSM5918536	PAIRED	2	0h	yes	GSE197495		GSE197495_2_ctrl_C4-2_ctrl
SRR18150772	PrEC	ctrl	ctrl	GSM5918535	PAIRED	1	2h	yes	GSE197495		GSE197495_1_ctrl_PrEC_ctrl
SRR18150773	PrEC	ctrl	ctrl	GSM5918534	PAIRED	1	1h	yes	GSE197495		GSE197495_1_ctrl_PrEC_ctrl
SRR18150774	PrEC	ctrl	ctrl	GSM5918533	PAIRED	1	0.25h	yes	GSE197495		GSE197495_1_ctrl_PrEC_ctrl
SRR18150775	PrEC	ctrl	ctrl	GSM5918532	PAIRED	1	0h	yes	GSE197495		GSE197495_1_ctrl_PrEC_ctrl
SRR25685459	HepG2	IGF2BP3 knockdown	IGF2BP3 knockdown	GSM7717358	PAIRED	2	6h	yes	GSE241147		GSE241147_2_IGF2BP3 knockdown_HepG2_IGF2BP3 knockdown
SRR25685460	HepG2	IGF2BP3 knockdown	IGF2BP3 knockdown	GSM7717357	PAIRED	1	6h	yes	GSE241147		GSE241147_1_IGF2BP3 knockdown_HepG2_IGF2BP3 knockdown
SRR25685461	HepG2	IGF2BP3 knockdown	IGF2BP3 knockdown	GSM7717356	PAIRED	2	3h	yes	GSE241147		GSE241147_2_IGF2BP3 knockdown_HepG2_IGF2BP3 knockdown
SRR25685462	HepG2	IGF2BP3 knockdown	IGF2BP3 knockdown	GSM7717354	PAIRED	2	0h	yes	GSE241147		GSE241147_2_IGF2BP3 knockdown_HepG2_IGF2BP3 knockdown
SRR25685463	HepG2	IGF2BP2 knockdown	IGF2BP2 knockdown	GSM7717352	PAIRED	2	6h	yes	GSE241147		GSE241147_2_IGF2BP2 knockdown_HepG2_IGF2BP2 knockdown
SRR25685464	HepG2	IGF2BP2 knockdown	IGF2BP2 knockdown	GSM7717351	PAIRED	1	6h	yes	GSE241147		GSE241147_1_IGF2BP2 knockdown_HepG2_IGF2BP2 knockdown
SRR25685465	HepG2	IGF2BP3 knockdown	IGF2BP3 knockdown	GSM7717353	PAIRED	1	0h	yes	GSE241147		GSE241147_1_IGF2BP3 knockdown_HepG2_IGF2BP3 knockdown
SRR25685466	HepG2	IGF2BP3 knockdown	IGF2BP3 knockdown	GSM7717355	PAIRED	1	3h	yes	GSE241147		GSE241147_1_IGF2BP3 knockdown_HepG2_IGF2BP3 knockdown
SRR25685467	HepG2	IGF2BP2 knockdown	IGF2BP2 knockdown	GSM7717350	PAIRED	2	3h	yes	GSE241147		GSE241147_2_IGF2BP2 knockdown_HepG2_IGF2BP2 knockdown
SRR25685468	HepG2	IGF2BP2 knockdown	IGF2BP2 knockdown	GSM7717349	PAIRED	1	3h	yes	GSE241147		GSE241147_1_IGF2BP2 knockdown_HepG2_IGF2BP2 knockdown
SRR25685469	HepG2	IGF2BP2 knockdown	IGF2BP2 knockdown	GSM7717347	PAIRED	1	0h	yes	GSE241147		GSE241147_1_IGF2BP2 knockdown_HepG2_IGF2BP2 knockdown
SRR25685470	HepG2	IGF2BP1 knockdown	IGF2BP1 knockdown	GSM7717345	PAIRED	1	6h	yes	GSE241147		GSE241147_1_IGF2BP1 knockdown_HepG2_IGF2BP1 knockdown
SRR25685471	HepG2	IGF2BP1 knockdown	IGF2BP1 knockdown	GSM7717344	PAIRED	2	3h	yes	GSE241147		GSE241147_2_IGF2BP1 knockdown_HepG2_IGF2BP1 knockdown
SRR25685472	HepG2	IGF2BP1 knockdown	IGF2BP1 knockdown	GSM7717346	PAIRED	2	6h	yes	GSE241147		GSE241147_2_IGF2BP1 knockdown_HepG2_IGF2BP1 knockdown
SRR25685473	HepG2	IGF2BP2 knockdown	IGF2BP2 knockdown	GSM7717348	PAIRED	2	0h	yes	GSE241147		GSE241147_2_IGF2BP2 knockdown_HepG2_IGF2BP2 knockdown
SRR25685474	HepG2	IGF2BP1 knockdown	IGF2BP1 knockdown	GSM7717343	PAIRED	1	3h	yes	GSE241147		GSE241147_1_IGF2BP1 knockdown_HepG2_IGF2BP1 knockdown
SRR25685475	HepG2	IGF2BP1 knockdown	IGF2BP1 knockdown	GSM7717342	PAIRED	2	0h	yes	GSE241147		GSE241147_2_IGF2BP1 knockdown_HepG2_IGF2BP1 knockdown
SRR25685476	HepG2	ctrl	ctrl	GSM7717340	PAIRED	2	6h	yes	GSE241147		GSE241147_2_ctrl_HepG2_ctrl
SRR25685477	HepG2	ctrl	ctrl	GSM7717338	PAIRED	2	3h	yes	GSE241147		GSE241147_2_ctrl_HepG2_ctrl
SRR25685478	HepG2	ctrl	ctrl	GSM7717337	PAIRED	1	3h	yes	GSE241147		GSE241147_1_ctrl_HepG2_ctrl
SRR25685479	HepG2	ctrl	ctrl	GSM7717339	PAIRED	1	6h	yes	GSE241147		GSE241147_1_ctrl_HepG2_ctrl
SRR25685480	HepG2	IGF2BP1 knockdown	IGF2BP1 knockdown	GSM7717341	PAIRED	1	0h	yes	GSE241147		GSE241147_1_IGF2BP1 knockdown_HepG2_IGF2BP1 knockdown
SRR25685481	HepG2	ctrl	ctrl	GSM7717336	PAIRED	2	0h	yes	GSE241147		GSE241147_2_ctrl_HepG2_ctrl
SRR25685482	HepG2	ctrl	ctrl	GSM7717335	PAIRED	1	0h	yes	GSE241147		GSE241147_1_ctrl_HepG2_ctrl
