# Supplementary material
Source: HighWire-hosted journal article supplement (doi:10.1101/rna.080681.125)
Supplement: Supplemental_Table_S2.xlsx [file Supplemental_Table_S2.xlsx]

## Sheet: Table S2
Summary of complete time-course sets derived from Table S1.
column details
set	ID to track the full time course where the sample is included
ntime	Number of time points measured post actinomycin D treatment
cell	Cell name
treatment	Details of extra treatments applied on the cells
gid	Unique GEO accession number for the time 0 sample in the set
LibraryLayout	The sequencing lay out
rep	Replicate number within the same DEO dataset
comment	Special curation comment if any.
set	ntime	cell	treatment	gid	LibraryLayout	rep	comment
GSE103872_1_CNOT3 knockdown with si328_CCRF-CEM_CNOT3 knockdown with si328	3	CCRF-CEM	CNOT3 knockdown with si328	GSM2785175	SINGLE	1
GSE103872_1_ctrl_CCRF-CEM_ctrl	3	CCRF-CEM	ctrl	GSM2785169	SINGLE	1
GSE103872_2_CNOT3 knockdown with si328_CCRF-CEM_CNOT3 knockdown with si328	3	CCRF-CEM	CNOT3 knockdown with si328	GSM2785176	SINGLE	2
GSE103872_2_ctrl_CCRF-CEM_ctrl	3	CCRF-CEM	ctrl	GSM2785170	SINGLE	2
GSE117299_1_ShML3-2_HeLa_ShML3-2	3	HeLa	ShML3-2	GSM3290693	SINGLE	1
GSE117299_1_ShML3-3_HeLa_ShML3-3	3	HeLa	ShML3-3	GSM3290694	SINGLE	1
GSE121949_1_shMETTl14_HepG2_shMETTl14	3	HepG2	shMETTl14	GSM3450393	SINGLE	1
GSE121949_1_shSETD2_HepG2_shSETD2	4	HepG2	shSETD2	GSM3450385	SINGLE	1
GSE121949_2_shSETD2_HepG2_shSETD2	3	HepG2	shSETD2	GSM3450388	SINGLE	2
GSE145097_1_ctrl_MCF7_ctrl	3	MCF7	ctrl	GSM4306459	PAIRED	1
GSE145097_2_CPT 6uM, 24 hours_MCF7_CPT 6uM, 24 hours	3	MCF7	CPT 6uM, 24 hours	GSM4306474	PAIRED	2
GSE145097_2_ctrl_MCF7_ctrl	3	MCF7	ctrl	GSM4306460	PAIRED	2
GSE145097_3_ctrl_MCF7_ctrl	3	MCF7	ctrl	GSM4306461	PAIRED	3
GSE151805_1_ctrl_HeLa_NA	4	HeLa		GSM4591174	PAIRED	1
GSE151805_2_ctrl_HeLa_NA	4	HeLa		GSM4591175	PAIRED	2
GSE151805_3_ctrl_HeLa_NA	4	HeLa		GSM4591176	PAIRED	3
GSE163945,GSE163964_1_A5-KO_hPSC-PPC_A5-KO	4	hPSC-PPC	A5-KO	GSM5291808	PAIRED	1
GSE163945,GSE163964_1_ctrl_hPSC-PPC_ctrl	4	hPSC-PPC	ctrl	GSM5291800	PAIRED	1
GSE163945,GSE163964_2_A5-KO_hPSC-PPC_A5-KO	4	hPSC-PPC	A5-KO	GSM5291809	PAIRED	2
GSE163945,GSE163964_2_ctrl_hPSC-PPC_ctrl	4	hPSC-PPC	ctrl	GSM5291801	PAIRED	2
GSE172019_1_ctrl_HeLa_NA	4	HeLa		GSM5239844	SINGLE	1
GSE172019_1_RNF219 KO + RNF219-mut_HeLa_NA	4	HeLa		GSM5239856	SINGLE	1
GSE172019_1_RNF219 KO + RNF219-WT_HeLa_NA	4	HeLa		GSM5239852	SINGLE	1
GSE172019_1_RNF219 KO_HeLa_NA	4	HeLa		GSM5239848	SINGLE	1
GSE172019_2_ctrl_HeLa_NA	4	HeLa		GSM5239860	SINGLE	2
GSE172019_2_RNF219 KO + RNF219-mut_HeLa_NA	3	HeLa		GSM5239872	SINGLE	2
GSE172019_2_RNF219 KO + RNF219-WT_HeLa_NA	4	HeLa		GSM5239868	SINGLE	2
GSE172019_2_RNF219 KO_HeLa_NA	4	HeLa		GSM5239864	SINGLE	2
GSE181237_1_ctrl_HMLE_NA	3	HMLE		GSM5493345	SINGLE	1
GSE181237_1_RbMS3 expression_HMLE_NA	3	HMLE		GSM5493354	SINGLE	1
GSE181237_2_ctrl_HMLE_NA	3	HMLE		GSM5493343	SINGLE	2
GSE181237_2_RbMS3 expression_HMLE_NA	3	HMLE		GSM5493355	SINGLE	2
GSE181237_3_ctrl_HMLE_NA	4	HMLE		GSM5493344	SINGLE	3
GSE181237_3_RbMS3 expression_HMLE_NA	3	HMLE		GSM5493356	SINGLE	3
GSE184349_1_ctrl_HEK293T_NA	3	HEK293T		GSM5584858	PAIRED	1
GSE184349_2_ctrl_HEK293T_NA	3	HEK293T		GSM5584861	PAIRED	2
GSE188690,GSE188694_1_C2_HeLa_C2	3	HeLa	C2	GSM5688451	SINGLE	1
GSE188690,GSE188694_1_ctrl_HeLa_ctrl	4	HeLa	ctrl	GSM5688443	SINGLE	1
GSE188690,GSE188694_1_RMD_HeLa_RMD	3	HeLa	RMD	GSM5688448	SINGLE	1
GSE188690,GSE188694_1_S140_HeLa_S140	7	HeLa	S140	GSM5688459	SINGLE	1
GSE188690,GSE188694_1_S181_HeLa_S181	8	HeLa	DMSO	GSM5688467	SINGLE	1
GSE193732_1_ctrl_HEK293_GFP expression	3	HEK293	GFP expression	GSM5819493	PAIRED	1
GSE193732_2_ctrl_HEK293_GFP expression	3	HEK293	GFP expression	GSM5819497	PAIRED	2
GSE197495_1_ctrl_C4-2_ctrl	4	C4-2	ctrl	GSM5918543	PAIRED	1
GSE197495_1_ctrl_PrEC_ctrl	4	PrEC	ctrl	GSM5918535	PAIRED	1
GSE197495_1_ctrl_Tcell_ctrl	4	Tcell	ctrl	GSM5918561	PAIRED	1
GSE197495_1_METTL3 knockdown_C4-2_METTL3 knockdown	4	C4-2	METTL3 knockdown	GSM5918547	PAIRED	1
GSE197495_1_YTHDF2 knockdown_C4-2_YTHDF2 knockdown	4	C4-2	YTHDF2 knockdown	GSM5918551	PAIRED	1
GSE197495_2_ctrl_C4-2_ctrl	4	C4-2	ctrl	GSM5918537	PAIRED	2
GSE197495_2_ctrl_Tcell_ctrl	4	Tcell	ctrl	GSM5918562	PAIRED	2
GSE197495_3_ctrl_Tcell_ctrl	4	Tcell	ctrl	GSM5918563	PAIRED	3
GSE218222_1_ctrl_U2OS_ctrl	3	U2OS	ctrl	GSM6736810	PAIRED	1
GSE218222_1_sgQKI+QKI7-{delta}KH_U2OS_sgQKI+QKI7-{delta}KH	3	U2OS	sgQKI+QKI7-{delta}KH	GSM6736804	PAIRED	1
GSE218222_2_ctrl_U2OS_ctrl	3	U2OS	ctrl	GSM6736811	PAIRED	2
GSE218222_2_sgQKI+QKI7-{delta}KH_U2OS_sgQKI+QKI7-{delta}KH	3	U2OS	sgQKI+QKI7-{delta}KH	GSM6736805	PAIRED	2
GSE229230_1_ctrl_PANC-1_NA	5	PANC-1		GSM7157262	PAIRED	1
GSE229230_1_KHSRP knockout_PANC-1_NA	5	PANC-1		GSM7157252	PAIRED	1
GSE229230_2_ctrl_PANC-1_NA	5	PANC-1		GSM7157263	PAIRED	2
GSE229230_2_KHSRP knockout_PANC-1_NA	5	PANC-1		GSM7157253	PAIRED	2
GSE231519_NA_ANI_HeLa_ANI	3	HeLa	ANI	GSM7287604	SINGLE
GSE231519_NA_ctrl_HeLa_DMSO	8	HeLa	DMSO	GSM7287612	SINGLE	2
GSE241147_1_ctrl_HepG2_ctrl	3	HepG2	ctrl	GSM7717337	PAIRED	1
GSE241147_1_IGF2BP1 knockdown_HepG2_IGF2BP1 knockdown	3	HepG2	IGF2BP1 knockdown	GSM7717345	PAIRED	1
GSE241147_1_IGF2BP2 knockdown_HepG2_IGF2BP2 knockdown	3	HepG2	IGF2BP2 knockdown	GSM7717351	PAIRED	1
GSE241147_1_IGF2BP3 knockdown_HepG2_IGF2BP3 knockdown	3	HepG2	IGF2BP3 knockdown	GSM7717357	PAIRED	1
GSE241147_2_ctrl_HepG2_ctrl	3	HepG2	ctrl	GSM7717340	PAIRED	2
GSE241147_2_IGF2BP1 knockdown_HepG2_IGF2BP1 knockdown	3	HepG2	IGF2BP1 knockdown	GSM7717344	PAIRED	2
GSE241147_2_IGF2BP2 knockdown_HepG2_IGF2BP2 knockdown	3	HepG2	IGF2BP2 knockdown	GSM7717352	PAIRED	2
GSE241147_2_IGF2BP3 knockdown_HepG2_IGF2BP3 knockdown	3	HepG2	IGF2BP3 knockdown	GSM7717358	PAIRED	2
GSE249786_NA_ctrl_293T_	3	293T		GSM7976193	PAIRED
GSE272629_1_ctrl_HEK293_DMSO	4	HEK293	DMSO	GSM8408035	PAIRED	1
GSE272629_2_ctrl_HEK293_DMSO	4	HEK293	DMSO	GSM8408034	PAIRED	2
GSE272780_1_ctrl_HeLa_NA	3	HeLa		GSM8410746	SINGLE	1
GSE272780_2_ctrl_HeLa_NA	3	HeLa		GSM8410747	SINGLE	2
GSE272780_3_ctrl_HeLa_NA	3	HeLa		GSM8410748	SINGLE	3
GSE49339_2_ctrl_HeLa_ctrl	3	HeLa	ctrl	GSM1197628	SINGLE	2
GSE49339_2_SiYTHDF2_HeLa_SiYTHDF2	3	HeLa	SiYTHDF2	GSM1197631	SINGLE	2
GSE59626_2_ctrl_HeLa_ctrl	4	HeLa	ctrl	GSM1514008	SINGLE	2
GSE59626_2_siTUT47_HeLa_siTUT47	3	HeLa	siTUT47	GSM1514013	SINGLE	2
GSE60191_NA_ctrl_HeLa_ctrl	4	HeLa	ctrl	GSM1467406	SINGLE
GSE68611_1_ctrl_HEK 293_ctrl	3	HEK 293	ctrl	GSM1677099	SINGLE	1
GSE68611_2_ctrl_HEK 293_ctrl	3	HEK 293	ctrl	GSM1677102	SINGLE	2
GSE77704_1_ctrl_NPC_ctrl	6	NPC	ctrl	GSM2056814	SINGLE	1
GSE77704_1_FUS_NPC_FUS	6	NPC	FUS	GSM2056815	SINGLE	1
GSE77704_1_TAF15_NPC_TAF15	6	NPC	TAF15	GSM2056819	SINGLE	1
GSE86549_NA_ctrl_U2OS_ctrl	5	U2OS	ctrl	GSM2305455	PAIRED
GSE86549_NA_Long isoform kd_U2OS_Long isoform kd	6	U2OS	Long isoform kd	GSM2305460	PAIRED
GSE86549_NA_Short isoform kd_U2OS_Short isoform kd	3	U2OS	Short isoform kd	GSM2305473	PAIRED
GSE90684_1_ctrl_HepG2_ctrl	4	HepG2	ctrl	GSM2410384	SINGLE	1
GSE90684_1_shIGF2BP1_HepG2_shIGF2BP1	4	HepG2	shIGF2BP1	GSM2410392	SINGLE	1
GSE90684_1_shIGF2BP3_HepG2_shIGF2BP3	4	HepG2	shIGF2BP3	GSM2410400	SINGLE	1
GSE90684_2_ctrl_HepG2_ctrl	4	HepG2	ctrl	GSM2410385	SINGLE	2
GSE90684_2_shIGF2BP1_HepG2_shIGF2BP1	4	HepG2	shIGF2BP1	GSM2410393	SINGLE	2
GSE90684_2_shIGF2BP3_HepG2_shIGF2BP3	4	HepG2	shIGF2BP3	GSM2410401	SINGLE	2
GSE99517_1_ctrl_HEK293_NA	6	HEK293		GSM2645407	SINGLE	1
GSE99517_2_ctrl_HEK293_NA	5	HEK293		GSM2645414	SINGLE	2
