# Supplementary material
Source: HighWire-hosted journal article supplement (doi:10.1101/rna.080681.125)
Supplement: Supplemental_Table_S3.xlsx [file Supplemental_Table_S3.xlsx]

## Sheet: Table S3
Model-derived decay parameters for all eRNAs across complete time-course datasets. This table summarizes the results of exponential decay modelling applied to eRNAs in 92 RNA-Seq time-course datasets.
column details
ntime	Number of time points measured post actinomycin D treatment
nozero	Number of non-zero expresion time points measured post actinomycin D treatment
observed_t0	Expression at time 0
changed_t0	Expression at the next time point if time 0 was filtered due to quality issues
k	Decay rate for first-order model
y0_m1	Initial expression estimated by first-order model (normalised)
HF_m1	Half life in hours estimated by first-order model
AIC_m1	The Akaike information criterion for first-order model
k1	Initial decay rate for second-order model
k2	Second decay rate for second-order model
y0_m2	Initial expression estimated by second-order model (normalised)
HF_m2	Half life in hours estimated by second-order model
AIC_m2	The Akaike information criterion for second-order model
bestModel	Best model when comparing first-order to second-order model based on Akaike information critaria
anovP	ANOVA p-value when comparing first-order to second-order model
m1m2Sig	Indicate if ANNOVA test was signficant at p <0.05
gene	eRNA ID
set	ID to track the full time course where the sample is included
ntime	nozero	observed_t0	changed_t0	k	y0_m1	HF_m1	AIC_m1	k1	k2	y0_m2	HF_m2	AIC_m2	bestModel	anovP	m1m2Sig	gene	set
3	3	3816.79		0.0235778	0.770795	29.3983	8.04172									en111397	GSE145097_1_ctrl_MCF7_ctrl
3	3	2120.44		0.345745	0.990588	2.0048	-6.302									en111401	GSE145097_1_ctrl_MCF7_ctrl
3	3	1272.26		0.172964	1.01603	4.00747	-5.89157									en111469	GSE145097_1_ctrl_MCF7_ctrl
3	3	2544.53		0.322202	1.01112	2.15128	-5.70933									en117143	GSE145097_1_ctrl_MCF7_ctrl
3	3	1272.26		0.0139798	0.931264	49.5821	0.697396									en118159	GSE145097_1_ctrl_MCF7_ctrl
3	3	848.176		-0.137448	0.737904		7.06059									en120583	GSE145097_1_ctrl_MCF7_ctrl
3	3	1272.26		0.0139798	0.931264	49.5821	0.697396									en12306	GSE145097_1_ctrl_MCF7_ctrl
3	3	848.176		0.106896	0.928644	6.48428	2.12679									en126948	GSE145097_1_ctrl_MCF7_ctrl
3	3	1696.35		-0.137448	0.737904		7.06059									en128173	GSE145097_1_ctrl_MCF7_ctrl
3	3	6361.32		1.18999	0.999257	0.582484	-3.34783									en128480	GSE145097_1_ctrl_MCF7_ctrl
3	3	848.176		0.106896	0.928644	6.48428	2.12679									en135162	GSE145097_1_ctrl_MCF7_ctrl
3	3	1272.26		0.0201224	0.809891	34.4466	6.87688									en136363	GSE145097_1_ctrl_MCF7_ctrl
3	3	848.176		-0.137448	0.737904		7.06059									en141263	GSE145097_1_ctrl_MCF7_ctrl
3	3	1272.26		0.265828	0.948505	2.6075	2.54941									en143478	GSE145097_1_ctrl_MCF7_ctrl
3	3	3392.71		0.425857	1.00062	1.62765	-21.1401									en14820	GSE145097_1_ctrl_MCF7_ctrl
3	3	1272.26		0.172964	1.01603	4.00747	-5.89157									en149914	GSE145097_1_ctrl_MCF7_ctrl
3	3	1272.26		0.265828	0.948505	2.6075	2.54941									en153021	GSE145097_1_ctrl_MCF7_ctrl
3	3	2968.62		0.486167	0.991057	1.42574	-4.01927									en153716	GSE145097_1_ctrl_MCF7_ctrl
3	3	2968.62		0.0618575	0.927365	11.2056	1.63221									en154703	GSE145097_1_ctrl_MCF7_ctrl
3	3	848.176		-0.137448	0.737904		7.06059									en161154	GSE145097_1_ctrl_MCF7_ctrl
3	3	2120.44		0.0577666	0.862124	11.9991	5.42462									en167877	GSE145097_1_ctrl_MCF7_ctrl
3	3	3392.71		0.215986	0.941189	3.20922	2.55714									en168551	GSE145097_1_ctrl_MCF7_ctrl
3	3	848.176		0.106896	0.928644	6.48428	2.12679									en169897	GSE145097_1_ctrl_MCF7_ctrl
3	3	848.176		0.106896	0.928644	6.48428	2.12679									en170948	GSE145097_1_ctrl_MCF7_ctrl
3	3	2544.53		-0.205183	0.67038		7.80854									en171271	GSE145097_1_ctrl_MCF7_ctrl
3	3	1696.35		-0.0249063	0.838211		5.37043									en173624	GSE145097_1_ctrl_MCF7_ctrl
3	3	1696.35		-0.184371	0.590218		9.2997									en179233	GSE145097_1_ctrl_MCF7_ctrl
3	3	21204.4		1.48331	0.999855	0.467297	-6.20251									en18478	GSE145097_1_ctrl_MCF7_ctrl
3	3	848.176		0.106896	0.928644	6.48428	2.12679									en247	GSE145097_1_ctrl_MCF7_ctrl
3	3	848.176		0.106896	0.928644	6.48428	2.12679									en24818	GSE145097_1_ctrl_MCF7_ctrl
3	3	3816.79		0.0806031	0.893271	8.59951	4.18753									en30385	GSE145097_1_ctrl_MCF7_ctrl
3	3	1272.26		0.265828	0.948505	2.6075	2.54941									en35334	GSE145097_1_ctrl_MCF7_ctrl
3	3	18659.9		0.198131	1.07272	3.49843	3.55734									en391	GSE145097_1_ctrl_MCF7_ctrl
3	3	848.176		0.106896	0.928644	6.48428	2.12679									en41134	GSE145097_1_ctrl_MCF7_ctrl
3	3	2120.44		0.345745	0.990588	2.0048	-6.302									en41682	GSE145097_1_ctrl_MCF7_ctrl
3	3	1272.26		0.172964	1.01603	4.00747	-5.89157									en46266	GSE145097_1_ctrl_MCF7_ctrl
3	3	1272.26		-0.117879	0.823724		4.87544									en480	GSE145097_1_ctrl_MCF7_ctrl
3	3	848.176		0.106896	0.928644	6.48428	2.12679									en51757	GSE145097_1_ctrl_MCF7_ctrl
3	3	1696.35		-0.110091	0.864415		3.37991									en59385	GSE145097_1_ctrl_MCF7_ctrl
3	3	848.176		0.106896	0.928644	6.48428	2.12679									en61825	GSE145097_1_ctrl_MCF7_ctrl
3	3	2968.62		-0.332842	0.621004		7.65951									en65021	GSE145097_1_ctrl_MCF7_ctrl
3	3	9329.94		1.00267	0.997972	0.691303	-1.71162									en65695	GSE145097_1_ctrl_MCF7_ctrl
3	3	3392.71		0.547663	0.992423	1.26565	-3.79887									en71312	GSE145097_1_ctrl_MCF7_ctrl
3	3	2968.62		0.486167	0.991057	1.42574	-4.01927									en71495	GSE145097_1_ctrl_MCF7_ctrl
3	3	1696.35		0.401753	0.967204	1.72531	2.18786									en71610	GSE145097_1_ctrl_MCF7_ctrl
3	3	2120.44		0.345745	0.990588	2.0048	-6.302									en71618	GSE145097_1_ctrl_MCF7_ctrl
3	3	57676		1.64088	0.999928	0.422423	-6.60196									en77229	GSE145097_1_ctrl_MCF7_ctrl
3	3	1696.35		-0.0337935	0.733488		8.26272									en81790	GSE145097_1_ctrl_MCF7_ctrl
3	3	2120.44		0.345745	0.990588	2.0048	-6.302									en84207	GSE145097_1_ctrl_MCF7_ctrl
3	3	1696.35		0.106896	0.928644	6.48428	2.12679									en89003	GSE145097_1_ctrl_MCF7_ctrl
3	3	506.842		-0.150593	0.775248		6.01075									en103973	GSE145097_2_ctrl_MCF7_ctrl
3	3	1013.68		0.0747156	0.954113	9.27714	-0.955085									en104890	GSE145097_2_ctrl_MCF7_ctrl
3	3	506.842		-0.150593	0.775248		6.01075									en104976	GSE145097_2_ctrl_MCF7_ctrl
3	3	1013.68		0.0747156	0.954113	9.27714	-0.955085									en105810	GSE145097_2_ctrl_MCF7_ctrl
3	3	3041.05		-0.0825154	0.838508		4.71754									en110650	GSE145097_2_ctrl_MCF7_ctrl
3	3	3547.9		0.325742	0.950713	2.1279	3.28631									en111397	GSE145097_2_ctrl_MCF7_ctrl
3	3	506.842		-0.150593	0.775248		6.01075									en113443	GSE145097_2_ctrl_MCF7_ctrl
3	3	506.842		-0.150593	0.775248		6.01075									en116050	GSE145097_2_ctrl_MCF7_ctrl
3	3	506.842		-0.150593	0.775248		6.01075									en116793	GSE145097_2_ctrl_MCF7_ctrl
3	3	1013.68		0.108599	0.864066	6.38262	6.01704									en118596	GSE145097_2_ctrl_MCF7_ctrl
3	3	506.842		-0.150593	0.775248		6.01075									en122037	GSE145097_2_ctrl_MCF7_ctrl
3	3	506.842		-0.150593	0.775248		6.01075									en123816	GSE145097_2_ctrl_MCF7_ctrl
3	3	2027.37		0.0884775	0.906517	7.83417	3.49764									en128173	GSE145097_2_ctrl_MCF7_ctrl
3	3	3041.05		0.538002	0.983472	1.28837	0.686582									en128480	GSE145097_2_ctrl_MCF7_ctrl
3	3	1013.68		-0.208737	0.59071		9.07657									en134616	GSE145097_2_ctrl_MCF7_ctrl
3	3	506.842		-0.150593	0.775248		6.01075									en137850	GSE145097_2_ctrl_MCF7_ctrl
3	3	4561.58		0.306093	0.984538	2.2645	-4.00314									en140810	GSE145097_2_ctrl_MCF7_ctrl
3	3	506.842		-0.480912	0.437614		9.18496									en141093	GSE145097_2_ctrl_MCF7_ctrl
3	3	1520.53		0.215335	0.953489	3.21893	1.13931									en145853	GSE145097_2_ctrl_MCF7_ctrl
3	3	1520.53		0.3094	0.929393	2.24029	5.16499									en14820	GSE145097_2_ctrl_MCF7_ctrl
3	3	506.842		-0.150593	0.775248		6.01075									en148226	GSE145097_2_ctrl_MCF7_ctrl
3	3	1520.53		0.3094	0.929393	2.24029	5.16499									en154703	GSE145097_2_ctrl_MCF7_ctrl
3	3	1013.68		-0.208737	0.59071		9.07657									en154803	GSE145097_2_ctrl_MCF7_ctrl
3	3	506.842		-0.150593	0.775248		6.01075									en159606	GSE145097_2_ctrl_MCF7_ctrl
3	3	3041.05		0.778552	0.990562	0.890303	2.42069									en160307	GSE145097_2_ctrl_MCF7_ctrl
3	3	2534.21		0.247845	1.02722	2.7967	-1.56429									en161832	GSE145097_2_ctrl_MCF7_ctrl
3	3	506.842		-0.914214	0.158347		10.4801									en16199	GSE145097_2_ctrl_MCF7_ctrl
3	3	89711.1		1.01897	0.998369	0.680244	-2.63945									en163385	GSE145097_2_ctrl_MCF7_ctrl
3	3	3041.05		0.0677119	0.987657	10.2367	-8.9257									en168551	GSE145097_2_ctrl_MCF7_ctrl
3	3	2027.37		-0.174629	0.688281		7.74749									en169460	GSE145097_2_ctrl_MCF7_ctrl
3	3	1013.68		-0.150593	0.775248		6.01075									en169760	GSE145097_2_ctrl_MCF7_ctrl
3	3	6588.95		0.125806	0.899253	5.50966	4.45848									en170928	GSE145097_2_ctrl_MCF7_ctrl
3	3	5575.27		0.576565	0.981867	1.2022	2.02256									en172271	GSE145097_2_ctrl_MCF7_ctrl
3	3	506.842		-0.150593	0.775248		6.01075									en172273	GSE145097_2_ctrl_MCF7_ctrl
3	3	506.842		-0.480912	0.437614		9.18496									en178245	GSE145097_2_ctrl_MCF7_ctrl
3	3	3041.05		0.136848	1.05691	5.0651	1.18688									en179719	GSE145097_2_ctrl_MCF7_ctrl
3	3	506.842		-0.728845	0.247957		10.1038									en180028	GSE145097_2_ctrl_MCF7_ctrl
3	3	2027.37		0.216893	1.01796	3.19581	-4.54624									en180340	GSE145097_2_ctrl_MCF7_ctrl
3	3	1013.68		0.0747156	0.954113	9.27714	-0.955085									en181216	GSE145097_2_ctrl_MCF7_ctrl
3	3	3547.9		0.113055	0.975033	6.13106	-4.08933									en2181	GSE145097_2_ctrl_MCF7_ctrl
3	3	1520.53		0.136848	1.05691	5.0651	1.18688									en24335	GSE145097_2_ctrl_MCF7_ctrl
3	3	506.842		-0.480912	0.437614		9.18496									en27211	GSE145097_2_ctrl_MCF7_ctrl
3	3	2027.37		-0.0403872	0.935049		-0.283395									en27390	GSE145097_2_ctrl_MCF7_ctrl
3	3	4054.74		0.0103272	0.971646	67.1188	-4.66015									en30385	GSE145097_2_ctrl_MCF7_ctrl
3	3	1013.68		0.0747156	0.954113	9.27714	-0.955085									en36595	GSE145097_2_ctrl_MCF7_ctrl
3	3	2027.37		-0.0461589	0.86933		3.84568									en38760	GSE145097_2_ctrl_MCF7_ctrl
3	3	4054.74		0.143021	0.989419	4.84648	-8.81948									en39263	GSE145097_2_ctrl_MCF7_ctrl
3	3	506.842		-0.150593	0.775248		6.01075									en42446	GSE145097_2_ctrl_MCF7_ctrl
3	3	506.842		-0.150593	0.775248		6.01075									en45701	GSE145097_2_ctrl_MCF7_ctrl
3	3	1520.53		0.3094	0.929393	2.24029	5.16499									en46266	GSE145097_2_ctrl_MCF7_ctrl
3	3	1520.53		-0.272733	0.649755		7.61918									en480	GSE145097_2_ctrl_MCF7_ctrl
3	3	1520.53		0.167045	0.99975	4.14947	-30.954									en50564	GSE145097_2_ctrl_MCF7_ctrl
3	3	506.842		-0.480912	0.437614		9.18496									en59384	GSE145097_2_ctrl_MCF7_ctrl
3	3	2534.21		-0.988109	0.0942609		10.8469									en62835	GSE145097_2_ctrl_MCF7_ctrl
3	3	506.842		-0.480912	0.437614		9.18496									en63311	GSE145097_2_ctrl_MCF7_ctrl
3	3	1013.68		0.0747156	0.954113	9.27714	-0.955085									en65512	GSE145097_2_ctrl_MCF7_ctrl
3	3	1013.68		-0.208737	0.59071		9.07657									en71472	GSE145097_2_ctrl_MCF7_ctrl
3	3	506.842		-0.150593	0.775248		6.01075									en71595	GSE145097_2_ctrl_MCF7_ctrl
3	3	506.842		-0.150593	0.775248		6.01075									en71610	GSE145097_2_ctrl_MCF7_ctrl
3	3	1013.68		-0.728845	0.247957		10.1038									en72508	GSE145097_2_ctrl_MCF7_ctrl
3	3	51697.9		1.46282	0.999878	0.473842	-7.71307									en77229	GSE145097_2_ctrl_MCF7_ctrl
3	3	1520.53		0.3094	0.929393	2.24029	5.16499									en80169	GSE145097_2_ctrl_MCF7_ctrl
3	3	506.842		-0.150593	0.775248		6.01075									en84207	GSE145097_2_ctrl_MCF7_ctrl
3	3	506.842		-0.150593	0.775248		6.01075									en87964	GSE145097_2_ctrl_MCF7_ctrl
3	3	3041.05		-0.00667843	0.979925		-6.93653									en91954	GSE145097_2_ctrl_MCF7_ctrl
3	3	1013.68		-0.150593	0.775248		6.01075									en92077	GSE145097_2_ctrl_MCF7_ctrl
3	3	7526		-0.232568	0.671667		7.552									en103352	GSE145097_3_ctrl_MCF7_ctrl
3	3	684.182		-0.0999203	0.767308		6.72573									en104929	GSE145097_3_ctrl_MCF7_ctrl
3	3	957.854		0.267405	0.952832	2.59213	2.04842									en105223	GSE145097_3_ctrl_MCF7_ctrl
3	3	957.854		-0.802749	0.148404		10.7067									en105279	GSE145097_3_ctrl_MCF7_ctrl
3	3	1231.53		0.0766805	1.02156	9.03942	-5.46066									en107884	GSE145097_3_ctrl_MCF7_ctrl
3	3	3831.42		0.232137	0.913193	2.98593	5.14478									en111397	GSE145097_3_ctrl_MCF7_ctrl
3	3	4241.93		-0.185445	0.80478		4.84088									en111399	GSE145097_3_ctrl_MCF7_ctrl
3	3	1915.71		0.111771	0.938189	6.20151	1.3322									en111401	GSE145097_3_ctrl_MCF7_ctrl
3	3	410.509		-0.0216665	0.96023		-3.01107									en112610	GSE145097_3_ctrl_MCF7_ctrl
3	3	2463.05		0.130752	1.04653	5.30123	-0.107171									en112805	GSE145097_3_ctrl_MCF7_ctrl
3	3	410.509		-0.0216665	0.96023		-3.01107									en118928	GSE145097_3_ctrl_MCF7_ctrl
3	3	821.018		0.204146	0.945147	3.39535	1.95737									en121824	GSE145097_3_ctrl_MCF7_ctrl
3	3	547.345		0.0611962	0.939635	11.3266	0.513329									en123816	GSE145097_3_ctrl_MCF7_ctrl
3	3	684.182		0.13587	0.939142	5.10153	1.57592									en123818	GSE145097_3_ctrl_MCF7_ctrl
3	3	821.018		-0.443432	0.53838		8.18502									en124587	GSE145097_3_ctrl_MCF7_ctrl
3	3	2736.73		0.836503	0.99551	0.828625	-0.742355									en12502	GSE145097_3_ctrl_MCF7_ctrl
3	3	684.182		0.13587	0.939142	5.10153	1.57592									en125290	GSE145097_3_ctrl_MCF7_ctrl
3	3	20936		-0.405523	0.387322		10.0895									en131226	GSE145097_3_ctrl_MCF7_ctrl
3	3	1778.87		0.238546	1.06107	2.90572	3.13613									en135162	GSE145097_3_ctrl_MCF7_ctrl
3	3	410.509		-0.0216665	0.96023		-3.01107									en139928	GSE145097_3_ctrl_MCF7_ctrl
3	3	547.345		0.0611962	0.939635	11.3266	0.513329									en141324	GSE145097_3_ctrl_MCF7_ctrl
3	3	410.509		-0.0216665	0.96023		-3.01107									en142000	GSE145097_3_ctrl_MCF7_ctrl
3	3	2189.38		0.11513	1.02245	6.02056	-4.69886									en142005	GSE145097_3_ctrl_MCF7_ctrl
3	3	1231.53		0.18807	1.06669	3.68558	2.8868									en143478	GSE145097_3_ctrl_MCF7_ctrl
3	3	547.345		0.0611962	0.939635	11.3266	0.513329									en14475	GSE145097_3_ctrl_MCF7_ctrl
3	3	547.345		-0.361285	0.549688		8.50801									en146382	GSE145097_3_ctrl_MCF7_ctrl
3	3	1642.04		-0.0417206	0.707758		8.7254									en153716	GSE145097_3_ctrl_MCF7_ctrl
3	3	3968.25		0.756033	0.996906	0.916822	-4.76947									en154803	GSE145097_3_ctrl_MCF7_ctrl
3	3	410.509		-0.258006	0.739034		5.96835									en155718	GSE145097_3_ctrl_MCF7_ctrl
3	3	1094.69		-0.241597	0.553825		9.31794									en156530	GSE145097_3_ctrl_MCF7_ctrl
3	3	684.182		0.13587	0.939142	5.10153	1.57592									en161541	GSE145097_3_ctrl_MCF7_ctrl
3	3	821.018		-0.0318764	0.795217		6.70388									en161775	GSE145097_3_ctrl_MCF7_ctrl
3	3	410.509		-0.258006	0.739034		5.96835									en162387	GSE145097_3_ctrl_MCF7_ctrl
3	3	684.182		-0.284338	0.582547		8.58449									en162400	GSE145097_3_ctrl_MCF7_ctrl
3	3	1094.69		0.212439	1.01107	3.2628	-7.51907									en165053	GSE145097_3_ctrl_MCF7_ctrl
3	3	3694.58		0.0904693	0.964779	7.66168	-2.33239									en168551	GSE145097_3_ctrl_MCF7_ctrl
3	3	2463.05		0.204146	0.945147	3.39535	1.95737									en170776	GSE145097_3_ctrl_MCF7_ctrl
3	3	957.854		0.020911	0.945862	33.1474	-0.64977									en170948	GSE145097_3_ctrl_MCF7_ctrl
3	3	2052.55		-0.171697	0.829186		4.16533									en173624	GSE145097_3_ctrl_MCF7_ctrl
3	3	2463.05		0.0259322	0.992516	26.7292	-12.4606									en179719	GSE145097_3_ctrl_MCF7_ctrl
3	3	2599.89		0.190017	0.972668	3.64782	-2.43644									en180340	GSE145097_3_ctrl_MCF7_ctrl
3	3	3284.07		0.016443	0.910132	42.1546	2.33614									en18478	GSE145097_3_ctrl_MCF7_ctrl
3	3	410.509		-0.0216665	0.96023		-3.01107									en2222	GSE145097_3_ctrl_MCF7_ctrl
3	3	10536.4		1.57038	0.999846	0.441388	-3.7246									en2378	GSE145097_3_ctrl_MCF7_ctrl
3	3	5747.13		0.263557	0.98471	2.62997	-4.77324									en30385	GSE145097_3_ctrl_MCF7_ctrl
3	3	1368.36		-0.61961	0.212592		10.6674									en33166	GSE145097_3_ctrl_MCF7_ctrl
3	3	547.345		0.0611962	0.939635	11.3266	0.513329									en336	GSE145097_3_ctrl_MCF7_ctrl
3	3	410.509		-0.258006	0.739034		5.96835									en37775	GSE145097_3_ctrl_MCF7_ctrl
3	3	2599.89		0.0910961	1.01373	7.60896	-7.978									en39263	GSE145097_3_ctrl_MCF7_ctrl
3	3	410.509		-0.0216665	0.96023		-3.01107									en39467	GSE145097_3_ctrl_MCF7_ctrl
3	3	410.509		-0.0216665	0.96023		-3.01107									en41196	GSE145097_3_ctrl_MCF7_ctrl
3	3	547.345		-0.520401	0.396087		9.43708									en42445	GSE145097_3_ctrl_MCF7_ctrl
3	3	1505.2		-0.0650925	0.781124		6.73039									en42923	GSE145097_3_ctrl_MCF7_ctrl
3	3	1368.36		-0.295546	0.666361		7.15693									en46195	GSE145097_3_ctrl_MCF7_ctrl
3	3	2189.38		0.133558	0.979087	5.18986	-4.86589									en46266	GSE145097_3_ctrl_MCF7_ctrl
3	3	547.345		-0.520401	0.396087		9.43708									en48728	GSE145097_3_ctrl_MCF7_ctrl
3	3	410.509		-0.0216665	0.96023		-3.01107									en55312	GSE145097_3_ctrl_MCF7_ctrl
3	3	1778.87		-0.409041	0.416112		9.7808									en55314	GSE145097_3_ctrl_MCF7_ctrl
3	3	1778.87		0.383288	0.992254	1.80842	-6.80523									en59105	GSE145097_3_ctrl_MCF7_ctrl
3	3	957.854		-0.313023	0.633972		7.58733									en61491	GSE145097_3_ctrl_MCF7_ctrl
3	3	1231.53		-0.0378233	0.737557		8.1244									en63317	GSE145097_3_ctrl_MCF7_ctrl
3	3	2463.05		0.116897	0.901084	5.92954	4.22419									en65513	GSE145097_3_ctrl_MCF7_ctrl
3	3	821.018		0.130752	1.04653	5.30123	-0.107171									en66616	GSE145097_3_ctrl_MCF7_ctrl
3	3	821.018		-0.0216665	0.96023		-3.01107									en700	GSE145097_3_ctrl_MCF7_ctrl
3	3	2599.89		0.322185	0.98014	2.15139	-2.22834									en71312	GSE145097_3_ctrl_MCF7_ctrl
3	3	1231.53		-0.0378233	0.737557		8.1244									en71595	GSE145097_3_ctrl_MCF7_ctrl
3	3	1368.36		0.215912	1.0495	3.21032	1.52183									en71941	GSE145097_3_ctrl_MCF7_ctrl
3	3	410.509		-0.258006	0.739034		5.96835									en73075	GSE145097_3_ctrl_MCF7_ctrl
3	3	18062.4		1.33425	0.999786	0.519505	-7.40576									en77229	GSE145097_3_ctrl_MCF7_ctrl
3	3	1505.2		0.485421	0.977724	1.42793	1.44177									en80169	GSE145097_3_ctrl_MCF7_ctrl
3	3	1642.04		0.533031	0.981679	1.30039	1.20537									en80170	GSE145097_3_ctrl_MCF7_ctrl
3	3	1094.69		-0.17503	0.743953		6.56327									en82760	GSE145097_3_ctrl_MCF7_ctrl
3	3	410.509		-0.443432	0.53838		8.18502									en84633	GSE145097_3_ctrl_MCF7_ctrl
3	3	1778.87		0.292976	1.02046	2.36588	-2.54243									en89003	GSE145097_3_ctrl_MCF7_ctrl
3	3	957.854		-0.149844	0.663673		8.43657									en92077	GSE145097_3_ctrl_MCF7_ctrl
3	3	2599.89		-0.0941891	0.884957		2.55904									en92987	GSE145097_3_ctrl_MCF7_ctrl
3	3	1915.71		0.172798	1.02446	4.01133	-3.35951									en97509	GSE145097_3_ctrl_MCF7_ctrl
3	3	1505.2		0.170711	0.941739	4.06036	1.81762									en97517	GSE145097_3_ctrl_MCF7_ctrl
3	3	70.3023		-0.00798594	0.946278		-3.04698									en100054	GSE145097_2_CPT 6uM, 24 hours_MCF7_CPT 6uM, 24 hours
3	3	50.2159		0.319704	1.84838	2.16809	-0.941681									en100055	GSE145097_2_CPT 6uM, 24 hours_MCF7_CPT 6uM, 24 hours
3	3	110.475		0.0727575	1.01591	9.52682	4.86983									en100056	GSE145097_2_CPT 6uM, 24 hours_MCF7_CPT 6uM, 24 hours
3	3	20.0864		0.233193	1.5518	2.97242	-1.93266									en100092	GSE145097_2_CPT 6uM, 24 hours_MCF7_CPT 6uM, 24 hours
3	3	30.1296		-0.0842688	0.599935		8.21007									en1001	GSE145097_2_CPT 6uM, 24 hours_MCF7_CPT 6uM, 24 hours
3	3	70.3023		0.160914	1.39003	4.30755	-10.6074									en10041	GSE145097_2_CPT 6uM, 24 hours_MCF7_CPT 6uM, 24 hours
3	3	40.1727		0.233193	1.5518	2.97242	-1.93266									en10042	GSE145097_2_CPT 6uM, 24 hours_MCF7_CPT 6uM, 24 hours
3	3	40.1727		-0.0359557	0.839962		2.19895									en10043	GSE145097_2_CPT 6uM, 24 hours_MCF7_CPT 6uM, 24 hours
3	3	120.518		0.344158	1.884	2.01404	4.08951									en10044	GSE145097_2_CPT 6uM, 24 hours_MCF7_CPT 6uM, 24 hours
3	3	20.0864		0.0370085	0.936059	18.7294	4.84016									en10045	GSE145097_2_CPT 6uM, 24 hours_MCF7_CPT 6uM, 24 hours
3	3	110.475		0.145621	1.23279	4.75993	3.25685									en10050	GSE145097_2_CPT 6uM, 24 hours_MCF7_CPT 6uM, 24 hours
3	3	30.1296		-0.0842688	0.599935		8.21007									en100546	GSE145097_2_CPT 6uM, 24 hours_MCF7_CPT 6uM, 24 hours
3	3	30.1296		0.136047	1.28914	5.0949	-5.74566									en100548	GSE145097_2_CPT 6uM, 24 hours_MCF7_CPT 6uM, 24 hours
3	3	50.2159		0.166268	1.19292	4.16886	7.20465									en10074	GSE145097_2_CPT 6uM, 24 hours_MCF7_CPT 6uM, 24 hours
3	3	110.475		0.425563	2.27805	1.62878	1.55306									en10076	GSE145097_2_CPT 6uM, 24 hours_MCF7_CPT 6uM, 24 hours
3	3	70.3023		0.27539	1.61623	2.51697	4.39477									en100777	GSE145097_2_CPT 6uM, 24 hours_MCF7_CPT 6uM, 24 hours
3	3	40.1727		-0.0359557	0.839962		2.19895									en100779	GSE145097_2_CPT 6uM, 24 hours_MCF7_CPT 6uM, 24 hours
3	3	60.2591		-0.0185824	0.797084		5.83683									en100785	GSE145097_2_CPT 6uM, 24 hours_MCF7_CPT 6uM, 24 hours
3	3	100.432		0.0987287	1.14726	7.02073	0.804086									en100787	GSE145097_2_CPT 6uM, 24 hours_MCF7_CPT 6uM, 24 hours
3	3	80.3455		0.0502463	0.878056	13.795	7.73388									en100789	GSE145097_2_CPT 6uM, 24 hours_MCF7_CPT 6uM, 24 hours
3	3	130.561		-0.0976428	0.728871		2.46521									en100792	GSE145097_2_CPT 6uM, 24 hours_MCF7_CPT 6uM, 24 hours
3	3	20.0864		0.0370085	0.936059	18.7294	4.84016									en10081	GSE145097_2_CPT 6uM, 24 hours_MCF7_CPT 6uM, 24 hours
3	3	2781.96		-0.0130966	0.947499		-5.15598									en101323	GSE145097_2_CPT 6uM, 24 hours_MCF7_CPT 6uM, 24 hours
3	3	1004.32		-0.045105	0.870713		-2.2663									en101325	GSE145097_2_CPT 6uM, 24 hours_MCF7_CPT 6uM, 24 hours
3	3	130.561		0.0668945	0.856055	10.3618	9.14132									en101327	GSE145097_2_CPT 6uM, 24 hours_MCF7_CPT 6uM, 24 hours
3	3	30.1296		0.136047	1.28914	5.0949	-5.74566									en101329	GSE145097_2_CPT 6uM, 24 hours_MCF7_CPT 6uM, 24 hours
3	3	60.2591		0.162399	1.30567	4.26817	1.50417									en101692	GSE145097_2_CPT 6uM, 24 hours_MCF7_CPT 6uM, 24 hours
3	3	984.232		0.0525731	1.06543	13.1845	-1.93307									en101874	GSE145097_2_CPT 6uM, 24 hours_MCF7_CPT 6uM, 24 hours
3	3	90.3887		-0.0888271	0.693227		5.0287									en101875	GSE145097_2_CPT 6uM, 24 hours_MCF7_CPT 6uM, 24 hours
3	3	773.325		-0.00181457	0.948706		-1.6675									en101887	GSE145097_2_CPT 6uM, 24 hours_MCF7_CPT 6uM, 24 hours
3	3	30.1296		-0.400445	0.179313		9.99895									en101895	GSE145097_2_CPT 6uM, 24 hours_MCF7_CPT 6uM, 24 hours
3	3	40.1727		0.0502463	0.878056	13.795	7.73388									en101975	GSE145097_2_CPT 6uM, 24 hours_MCF7_CPT 6uM, 24 hours
3	3	30.1296		0.398109	2.17151	1.7411	-0.673856									en101985	GSE145097_2_CPT 6uM, 24 hours_MCF7_CPT 6uM, 24 hours
3	3	60.2591		0.0448882	0.895156	15.4416	6.91569									en102003	GSE145097_2_CPT 6uM, 24 hours_MCF7_CPT 6uM, 24 hours
3	3	281.209		0.069685	1.05194	9.94687	2.67112									en102116	GSE145097_2_CPT 6uM, 24 hours_MCF7_CPT 6uM, 24 hours
3	3	692.98		0.0655177	1.10939	10.5795	-4.28987									en102123	GSE145097_2_CPT 6uM, 24 hours_MCF7_CPT 6uM, 24 hours
3	3	763.282		0.0759411	1.21407	9.12743	-1.33004									en102125	GSE145097_2_CPT 6uM, 24 hours_MCF7_CPT 6uM, 24 hours
3	3	230.993		0.17276	1.33077	4.01219	1.82256									en102328	GSE145097_2_CPT 6uM, 24 hours_MCF7_CPT 6uM, 24 hours
3	3	321.382		-0.159324	0.55948		6.08095									en10236	GSE145097_2_CPT 6uM, 24 hours_MCF7_CPT 6uM, 24 hours
3	3	20.0864		-0.371136	0.230437		9.26236									en102410	GSE145097_2_CPT 6uM, 24 hours_MCF7_CPT 6uM, 24 hours
3	3	200.864		0.313029	1.77431	2.21432	3.30833									en102471	GSE145097_2_CPT 6uM, 24 hours_MCF7_CPT 6uM, 24 hours
3	3	371.598		0.456767	2.43901	1.51751	0.736135									en102472	GSE145097_2_CPT 6uM, 24 hours_MCF7_CPT 6uM, 24 hours
3	3	20.0864		-0.371136	0.230437		9.26236									en102679	GSE145097_2_CPT 6uM, 24 hours_MCF7_CPT 6uM, 24 hours
3	3	20.0864		0.0370085	0.936059	18.7294	4.84016									en102699	GSE145097_2_CPT 6uM, 24 hours_MCF7_CPT 6uM, 24 hours
3	3	50.2159		-0.0698284	0.77673		2.37635									en102997	GSE145097_2_CPT 6uM, 24 hours_MCF7_CPT 6uM, 24 hours
3	3	40.1727		-0.119114	0.582147		7.22356									en103005	GSE145097_2_CPT 6uM, 24 hours_MCF7_CPT 6uM, 24 hours
3	3	80.3455		0.536003	2.88371	1.29318	-0.864698									en10345	GSE145097_2_CPT 6uM, 24 hours_MCF7_CPT 6uM, 24 hours
3	3	40.1727		0.536003	2.88371	1.29318	-0.864698									en103482	GSE145097_2_CPT 6uM, 24 hours_MCF7_CPT 6uM, 24 hours
3	3	40.1727		0.0370085	0.936059	18.7294	4.84016									en103719	GSE145097_2_CPT 6uM, 24 hours_MCF7_CPT 6uM, 24 hours
3	3	200.864		0.179848	1.34253	3.85407	2.42816									en10380	GSE145097_2_CPT 6uM, 24 hours_MCF7_CPT 6uM, 24 hours
3	3	30.1296		0.0448882	0.895156	15.4416	6.91569									en10381	GSE145097_2_CPT 6uM, 24 hours_MCF7_CPT 6uM, 24 hours
3	3	60.2591		0.388095	2.20282	1.78602	-3.3232									en103839	GSE145097_2_CPT 6uM, 24 hours_MCF7_CPT 6uM, 24 hours
3	3	170.734		0.0976219	1.11624	7.10033	2.81589									en10384	GSE145097_2_CPT 6uM, 24 hours_MCF7_CPT 6uM, 24 hours
3	3	100.432		0.0547436	1.09604	12.6617	-6.95561									en103840	GSE145097_2_CPT 6uM, 24 hours_MCF7_CPT 6uM, 24 hours
3	3	40.1727		0.233193	1.5518	2.97242	-1.93266									en103846	GSE145097_2_CPT 6uM, 24 hours_MCF7_CPT 6uM, 24 hours
3	3	20.0864		-0.119114	0.582147		7.22356									en103850	GSE145097_2_CPT 6uM, 24 hours_MCF7_CPT 6uM, 24 hours
3	3	60.2591		0.308994	1.84938	2.24324	-13.537									en103851	GSE145097_2_CPT 6uM, 24 hours_MCF7_CPT 6uM, 24 hours
3	3	20.0864		-0.251814	0.366054		8.49363									en103856	GSE145097_2_CPT 6uM, 24 hours_MCF7_CPT 6uM, 24 hours
3	3	291.252		0.0957847	1.16014	7.23651	-1.18846									en10386	GSE145097_2_CPT 6uM, 24 hours_MCF7_CPT 6uM, 24 hours
3	3	40.1727		-0.591292	0.069259		10.657									en103872	GSE145097_2_CPT 6uM, 24 hours_MCF7_CPT 6uM, 24 hours
3	3	60.2591		0.0370085	0.936059	18.7294	4.84016									en103888	GSE145097_2_CPT 6uM, 24 hours_MCF7_CPT 6uM, 24 hours
3	3	40.1727		0.181323	1.26284	3.82271	6.37376									en10389	GSE145097_2_CPT 6uM, 24 hours_MCF7_CPT 6uM, 24 hours
3	3	311.339		0.0586837	1.00035	11.8116	4.10478									en10404	GSE145097_2_CPT 6uM, 24 hours_MCF7_CPT 6uM, 24 hours
3	3	321.382		-0.0795044	0.748998		3.06289									en104092	GSE145097_2_CPT 6uM, 24 hours_MCF7_CPT 6uM, 24 hours
3	3	70.3023		-0.225301	0.352915		9.453									en104320	GSE145097_2_CPT 6uM, 24 hours_MCF7_CPT 6uM, 24 hours
3	3	130.561		-0.194717	0.556459		4.22344									en10444	GSE145097_2_CPT 6uM, 24 hours_MCF7_CPT 6uM, 24 hours
3	3	70.3023		0.0301996	0.996307	22.9522	0.287494									en104453	GSE145097_2_CPT 6uM, 24 hours_MCF7_CPT 6uM, 24 hours
3	3	80.3455		-0.253413	0.419163		6.92417									en10454	GSE145097_2_CPT 6uM, 24 hours_MCF7_CPT 6uM, 24 hours
3	3	40.1727		0.0370085	0.936059	18.7294	4.84016									en104637	GSE145097_2_CPT 6uM, 24 hours_MCF7_CPT 6uM, 24 hours
3	3	220.95		0.0277277	1.02739	24.9984	-4.51464									en104679	GSE145097_2_CPT 6uM, 24 hours_MCF7_CPT 6uM, 24 hours
3	3	351.511		0.0413184	1.07932	16.7757	-13.3134									en104680	GSE145097_2_CPT 6uM, 24 hours_MCF7_CPT 6uM, 24 hours
3	3	321.382		0.0512302	1.1024	13.53	-14.6141									en104683	GSE145097_2_CPT 6uM, 24 hours_MCF7_CPT 6uM, 24 hours
3	3	60.2591		0.0820392	1.12401	8.44898	-0.832442									en104684	GSE145097_2_CPT 6uM, 24 hours_MCF7_CPT 6uM, 24 hours
3	3	60.2591		0.586925	3.17051	1.18098	2.75049									en104685	GSE145097_2_CPT 6uM, 24 hours_MCF7_CPT 6uM, 24 hours
3	3	341.468		0.164743	1.32564	4.20745	0.373674									en10472	GSE145097_2_CPT 6uM, 24 hours_MCF7_CPT 6uM, 24 hours
3	3	301.296		0.117192	1.29656	5.91464	-3.86949									en10474	GSE145097_2_CPT 6uM, 24 hours_MCF7_CPT 6uM, 24 hours
3	3	30.1296		-0.472277	0.171671		9.18454									en104768	GSE145097_2_CPT 6uM, 24 hours_MCF7_CPT 6uM, 24 hours
3	3	120.518		0.1086	1.20339	6.38259	-2.7461									en10477	GSE145097_2_CPT 6uM, 24 hours_MCF7_CPT 6uM, 24 hours
3	3	50.2159		-0.0265517	0.812143		4.63421									en10478	GSE145097_2_CPT 6uM, 24 hours_MCF7_CPT 6uM, 24 hours
3	3	733.153		0.0930532	1.20113	7.44894	-17.4098									en104789	GSE145097_2_CPT 6uM, 24 hours_MCF7_CPT 6uM, 24 hours
3	3	30.1296		0.0448882	0.895156	15.4416	6.91569									en104851	GSE145097_2_CPT 6uM, 24 hours_MCF7_CPT 6uM, 24 hours
3	3	50.2159		0.0413637	0.910646	16.7574	6.1695									en104904	GSE145097_2_CPT 6uM, 24 hours_MCF7_CPT 6uM, 24 hours
3	3	70.3023		0.302948	1.85694	2.288	-5.0428									en104909	GSE145097_2_CPT 6uM, 24 hours_MCF7_CPT 6uM, 24 hours
3	3	70.3023		0.374601	1.97025	1.85036	6.12333									en104925	GSE145097_2_CPT 6uM, 24 hours_MCF7_CPT 6uM, 24 hours
3	3	361.555		0.0146374	0.957753	47.3545	0.804428									en104929	GSE145097_2_CPT 6uM, 24 hours_MCF7_CPT 6uM, 24 hours
3	3	50.2159		0.216176	1.44654	3.20641	2.80115									en104931	GSE145097_2_CPT 6uM, 24 hours_MCF7_CPT 6uM, 24 hours
3	3	40.1727		0.0293012	1.00688	23.6559	-0.971915									en104945	GSE145097_2_CPT 6uM, 24 hours_MCF7_CPT 6uM, 24 hours
3	3	261.123		0.103647	1.18325	6.68761	-1.65477									en104963	GSE145097_2_CPT 6uM, 24 hours_MCF7_CPT 6uM, 24 hours
3	3	40.1727		0.17861	1.46509	3.8808	-3.14123									en104964	GSE145097_2_CPT 6uM, 24 hours_MCF7_CPT 6uM, 24 hours
3	3	30.1296		0.398109	2.17151	1.7411	-0.673856									en105081	GSE145097_2_CPT 6uM, 24 hours_MCF7_CPT 6uM, 24 hours
3	3	20.0864		0.233193	1.5518	2.97242	-1.93266									en105089	GSE145097_2_CPT 6uM, 24 hours_MCF7_CPT 6uM, 24 hours
3	3	50.2159		0.303528	1.68932	2.28364	5.77014									en105092	GSE145097_2_CPT 6uM, 24 hours_MCF7_CPT 6uM, 24 hours
3	3	251.08		-0.00270823	0.92607		0.510068									en105094	GSE145097_2_CPT 6uM, 24 hours_MCF7_CPT 6uM, 24 hours
3	3	80.3455		0.0579839	1.13353	11.9541	-10.6803									en105095	GSE145097_2_CPT 6uM, 24 hours_MCF7_CPT 6uM, 24 hours
3	3	160.691		-0.152746	0.554538		6.56446									en105097	GSE145097_2_CPT 6uM, 24 hours_MCF7_CPT 6uM, 24 hours
3	3	351.511		0.112092	1.24444	6.18373	-13.2016									en105098	GSE145097_2_CPT 6uM, 24 hours_MCF7_CPT 6uM, 24 hours
3	3	110.475		0.0942716	1.25503	7.35266	-1.61243									en105099	GSE145097_2_CPT 6uM, 24 hours_MCF7_CPT 6uM, 24 hours
3	3	120.518		0.0458982	1.11434	15.1018	-7.42937									en105102	GSE145097_2_CPT 6uM, 24 hours_MCF7_CPT 6uM, 24 hours
3	3	301.296		0.0868499	1.21582	7.98098	-5.21597									en105103	GSE145097_2_CPT 6uM, 24 hours_MCF7_CPT 6uM, 24 hours
3	3	220.95		-0.0518802	0.809553		2.29141									en105104	GSE145097_2_CPT 6uM, 24 hours_MCF7_CPT 6uM, 24 hours
3	3	180.777		0.241103	1.60567	2.8749	-8.56463									en105105	GSE145097_2_CPT 6uM, 24 hours_MCF7_CPT 6uM, 24 hours
3	3	70.3023		0.0634568	1.14268	10.9231	-12.8446									en105200	GSE145097_2_CPT 6uM, 24 hours_MCF7_CPT 6uM, 24 hours
3	3	60.2591		0.272757	1.55241	2.54126	6.66295									en105219	GSE145097_2_CPT 6uM, 24 hours_MCF7_CPT 6uM, 24 hours
3	3	60.2591		0.388095	2.20282	1.78602	-3.3232									en105221	GSE145097_2_CPT 6uM, 24 hours_MCF7_CPT 6uM, 24 hours
3	3	30.1296		0.0314863	0.982405	22.0143	1.63799									en105230	GSE145097_2_CPT 6uM, 24 hours_MCF7_CPT 6uM, 24 hours
3	3	100.432		0.562986	3.02904	1.2312	1.55717									en105239	GSE145097_2_CPT 6uM, 24 hours_MCF7_CPT 6uM, 24 hours
3	3	50.2159		0.0541303	0.869411	12.8052	8.17583									en105262	GSE145097_2_CPT 6uM, 24 hours_MCF7_CPT 6uM, 24 hours
3	3	110.475		-0.0165865	0.941995		-5.44853									en105279	GSE145097_2_CPT 6uM, 24 hours_MCF7_CPT 6uM, 24 hours
3	3	833.584		0.056628	1.1313	12.2404	-10.2344									en105802	GSE145097_2_CPT 6uM, 24 hours_MCF7_CPT 6uM, 24 hours
3	3	100.432		0.471564	2.48475	1.46989	3.4258									en105804	GSE145097_2_CPT 6uM, 24 hours_MCF7_CPT 6uM, 24 hours
3	3	241.036		0.00691328	0.947424	100.263	0.330024									en105808	GSE145097_2_CPT 6uM, 24 hours_MCF7_CPT 6uM, 24 hours
3	3	2109.07		-0.0107755	0.965397		-9.33368									en105810	GSE145097_2_CPT 6uM, 24 hours_MCF7_CPT 6uM, 24 hours
3	3	40.1727		0.100654	1.21211	6.88641	-10.4425									en106008	GSE145097_2_CPT 6uM, 24 hours_MCF7_CPT 6uM, 24 hours
3	3	150.648		0.0483806	1.05319	14.327	-1.55656									en106078	GSE145097_2_CPT 6uM, 24 hours_MCF7_CPT 6uM, 24 hours
3	3	70.3023		-0.209641	0.479028		6.60501									en106082	GSE145097_2_CPT 6uM, 24 hours_MCF7_CPT 6uM, 24 hours
3	3	461.987		0.226279	1.50745	3.06325	0.590409									en106083	GSE145097_2_CPT 6uM, 24 hours_MCF7_CPT 6uM, 24 hours
3	3	783.368		-0.0862156	0.769928		0.839893									en106084	GSE145097_2_CPT 6uM, 24 hours_MCF7_CPT 6uM, 24 hours
3	3	140.605		0.133928	1.3889	5.17552	1.71151									en106137	GSE145097_2_CPT 6uM, 24 hours_MCF7_CPT 6uM, 24 hours
3	3	20.0864		-0.251814	0.366054		8.49363									en106413	GSE145097_2_CPT 6uM, 24 hours_MCF7_CPT 6uM, 24 hours
3	3	20.0864		0.233193	1.5518	2.97242	-1.93266									en106596	GSE145097_2_CPT 6uM, 24 hours_MCF7_CPT 6uM, 24 hours
3	3	60.2591		0.0971113	1.10319	7.13766	3.48887									en106707	GSE145097_2_CPT 6uM, 24 hours_MCF7_CPT 6uM, 24 hours
3	3	110.475		-0.0423821	0.817065		2.89087									en106726	GSE145097_2_CPT 6uM, 24 hours_MCF7_CPT 6uM, 24 hours
3	3	60.2591		0.136047	1.28914	5.0949	-5.74566									en106896	GSE145097_2_CPT 6uM, 24 hours_MCF7_CPT 6uM, 24 hours
3	3	110.475		0.081155	1.00441	8.54102	6.07794									en107046	GSE145097_2_CPT 6uM, 24 hours_MCF7_CPT 6uM, 24 hours
3	3	50.2159		-0.286639	0.259869		10.1003									en107047	GSE145097_2_CPT 6uM, 24 hours_MCF7_CPT 6uM, 24 hours
3	3	100.432		0.266658	1.63373	2.59939	1.27729									en107049	GSE145097_2_CPT 6uM, 24 hours_MCF7_CPT 6uM, 24 hours
3	3	100.432		0.187297	1.47399	3.70079	-6.72238									en107153	GSE145097_2_CPT 6uM, 24 hours_MCF7_CPT 6uM, 24 hours
3	3	90.3887		0.142641	1.4014	4.85939	0.907987									en107154	GSE145097_2_CPT 6uM, 24 hours_MCF7_CPT 6uM, 24 hours
3	3	532.289		0.0941906	1.21651	7.35898	-11.455									en10750	GSE145097_2_CPT 6uM, 24 hours_MCF7_CPT 6uM, 24 hours
3	3	60.2591		0.233193	1.5518	2.97242	-1.93266									en10751	GSE145097_2_CPT 6uM, 24 hours_MCF7_CPT 6uM, 24 hours
3	3	210.907		0.300846	1.69585	2.304	5.04347									en10754	GSE145097_2_CPT 6uM, 24 hours_MCF7_CPT 6uM, 24 hours
3	3	60.2591		0.154997	1.14347	4.47201	7.69892									en107601	GSE145097_2_CPT 6uM, 24 hours_MCF7_CPT 6uM, 24 hours
3	3	241.036		0.107894	1.15162	6.42436	2.18592									en107884	GSE145097_2_CPT 6uM, 24 hours_MCF7_CPT 6uM, 24 hours
3	3	30.1296		0.0314863	0.982405	22.0143	1.63799									en108145	GSE145097_2_CPT 6uM, 24 hours_MCF7_CPT 6uM, 24 hours
3	3	30.1296		0.136047	1.28914	5.0949	-5.74566									en108272	GSE145097_2_CPT 6uM, 24 hours_MCF7_CPT 6uM, 24 hours
3	3	40.1727		0.536003	2.88371	1.29318	-0.864698									en108273	GSE145097_2_CPT 6uM, 24 hours_MCF7_CPT 6uM, 24 hours
3	3	351.511		0.0680308	1.12342	10.1887	-6.18066									en108276	GSE145097_2_CPT 6uM, 24 hours_MCF7_CPT 6uM, 24 hours
3	3	100.432		-0.146499	0.58683		5.73895									en108278	GSE145097_2_CPT 6uM, 24 hours_MCF7_CPT 6uM, 24 hours
3	3	200.864		-0.125183	0.556224		7.69578									en108282	GSE145097_2_CPT 6uM, 24 hours_MCF7_CPT 6uM, 24 hours
3	3	30.1296		0.0448882	0.895156	15.4416	6.91569									en108321	GSE145097_2_CPT 6uM, 24 hours_MCF7_CPT 6uM, 24 hours
3	3	110.475		0.405875	2.26725	1.70778	-7.14036									en108393	GSE145097_2_CPT 6uM, 24 hours_MCF7_CPT 6uM, 24 hours
3	3	60.2591		-0.142214	0.492633		8.66809									en108394	GSE145097_2_CPT 6uM, 24 hours_MCF7_CPT 6uM, 24 hours
3	3	80.3455		0.196695	1.58188	3.52398	3.07999									en108395	GSE145097_2_CPT 6uM, 24 hours_MCF7_CPT 6uM, 24 hours
3	3	492.116		0.105221	1.25233	6.58753	-7.38733									en108397	GSE145097_2_CPT 6uM, 24 hours_MCF7_CPT 6uM, 24 hours
3	3	20.0864		-0.371136	0.230437		9.26236									en108459	GSE145097_2_CPT 6uM, 24 hours_MCF7_CPT 6uM, 24 hours
3	3	20.0864		-0.371136	0.230437		9.26236									en108460	GSE145097_2_CPT 6uM, 24 hours_MCF7_CPT 6uM, 24 hours
3	3	190.821		0.00109543	0.946205	632.765	-0.702554									en108468	GSE145097_2_CPT 6uM, 24 hours_MCF7_CPT 6uM, 24 hours
3	3	70.3023		0.221451	1.47782	3.13002	1.78559									en108471	GSE145097_2_CPT 6uM, 24 hours_MCF7_CPT 6uM, 24 hours
3	3	80.3455		0.0641684	1.10414	10.802	-3.87818									en108548	GSE145097_2_CPT 6uM, 24 hours_MCF7_CPT 6uM, 24 hours
3	3	90.3887		0.136047	1.28914	5.0949	-5.74566									en108752	GSE145097_2_CPT 6uM, 24 hours_MCF7_CPT 6uM, 24 hours
3	3	20.0864		0.233193	1.5518	2.97242	-1.93266									en109425	GSE145097_2_CPT 6uM, 24 hours_MCF7_CPT 6uM, 24 hours
3	3	60.2591		0.388095	2.20282	1.78602	-3.3232									en109569	GSE145097_2_CPT 6uM, 24 hours_MCF7_CPT 6uM, 24 hours
3	3	60.2591		-0.0604795	0.755449		4.40961									en109570	GSE145097_2_CPT 6uM, 24 hours_MCF7_CPT 6uM, 24 hours
3	3	130.561		0.0497618	1.07043	13.9293	-3.6381									en109571	GSE145097_2_CPT 6uM, 24 hours_MCF7_CPT 6uM, 24 hours
3	3	361.555		0.109326	1.27184	6.3402	-4.88542									en109574	GSE145097_2_CPT 6uM, 24 hours_MCF7_CPT 6uM, 24 hours
3	3	190.821		0.0566562	1.09754	12.2343	-6.16159									en109576	GSE145097_2_CPT 6uM, 24 hours_MCF7_CPT 6uM, 24 hours
3	3	60.2591		0.586925	3.17051	1.18098	2.75049									en109676	GSE145097_2_CPT 6uM, 24 hours_MCF7_CPT 6uM, 24 hours
3	3	30.1296		0.398109	2.17151	1.7411	-0.673856									en109679	GSE145097_2_CPT 6uM, 24 hours_MCF7_CPT 6uM, 24 hours
3	3	80.3455		0.438031	2.33077	1.58241	2.20766									en109680	GSE145097_2_CPT 6uM, 24 hours_MCF7_CPT 6uM, 24 hours
3	3	60.2591		0.202326	1.36925	3.4259	4.65732									en109737	GSE145097_2_CPT 6uM, 24 hours_MCF7_CPT 6uM, 24 hours
3	3	50.2159		0.303528	1.68932	2.28364	5.77014									en10983	GSE145097_2_CPT 6uM, 24 hours_MCF7_CPT 6uM, 24 hours
3	3	40.1727		0.129074	1.1995	5.37017	2.60471									en109863	GSE145097_2_CPT 6uM, 24 hours_MCF7_CPT 6uM, 24 hours
3	3	50.2159		0.0334839	0.963385	20.7009	3.12913									en109864	GSE145097_2_CPT 6uM, 24 hours_MCF7_CPT 6uM, 24 hours
3	3	40.1727		0.0293012	1.00688	23.6559	-0.971915									en109865	GSE145097_2_CPT 6uM, 24 hours_MCF7_CPT 6uM, 24 hours
3	3	200.864		-0.0374496	0.819738		3.25595									en10992	GSE145097_2_CPT 6uM, 24 hours_MCF7_CPT 6uM, 24 hours
3	3	622.678		0.0772725	1.12667	8.97017	-2.60414									en110084	GSE145097_2_CPT 6uM, 24 hours_MCF7_CPT 6uM, 24 hours
3	3	150.648		-0.00753385	0.835104		5.20842									en110137	GSE145097_2_CPT 6uM, 24 hours_MCF7_CPT 6uM, 24 hours
3	3	271.166		-0.0606242	0.814587		0.771159									en110138	GSE145097_2_CPT 6uM, 24 hours_MCF7_CPT 6uM, 24 hours
3	3	80.3455		0.100654	1.21211	6.88641	-10.4425									en110452	GSE145097_2_CPT 6uM, 24 hours_MCF7_CPT 6uM, 24 hours
3	3	60.2591		0.0710502	1.15584	9.75574	-17.9276									en110454	GSE145097_2_CPT 6uM, 24 hours_MCF7_CPT 6uM, 24 hours
3	3	40.1727		0.100654	1.21211	6.88641	-10.4425									en110457	GSE145097_2_CPT 6uM, 24 hours_MCF7_CPT 6uM, 24 hours
3	3	110.475		0.0277277	1.02739	24.9984	-4.51464									en110648	GSE145097_2_CPT 6uM, 24 hours_MCF7_CPT 6uM, 24 hours
3	3	150.648		0.315502	1.79996	2.19697	2.19645									en110650	GSE145097_2_CPT 6uM, 24 hours_MCF7_CPT 6uM, 24 hours
3	3	80.3455		-0.0513204	0.681315		7.56031									en110711	GSE145097_2_CPT 6uM, 24 hours_MCF7_CPT 6uM, 24 hours
3	3	180.777		0.300828	1.76471	2.30413	0.477201									en110712	GSE145097_2_CPT 6uM, 24 hours_MCF7_CPT 6uM, 24 hours
3	3	50.2159		-0.114422	0.679268		3.78233									en110714	GSE145097_2_CPT 6uM, 24 hours_MCF7_CPT 6uM, 24 hours
3	3	200.864		0.0293012	1.00688	23.6559	-0.971915									en110715	GSE145097_2_CPT 6uM, 24 hours_MCF7_CPT 6uM, 24 hours
3	3	50.2159		0.0822935	1.1763	8.42287	-19.0535									en110717	GSE145097_2_CPT 6uM, 24 hours_MCF7_CPT 6uM, 24 hours
3	3	251.08		0.069243	1.07684	10.0104	0.819674									en11079	GSE145097_2_CPT 6uM, 24 hours_MCF7_CPT 6uM, 24 hours
3	3	30.1296		-0.217629	0.454669		7.08335									en11080	GSE145097_2_CPT 6uM, 24 hours_MCF7_CPT 6uM, 24 hours
3	3	90.3887		0.202326	1.36925	3.4259	4.65732									en110802	GSE145097_2_CPT 6uM, 24 hours_MCF7_CPT 6uM, 24 hours
3	3	20.0864		0.233193	1.5518	2.97242	-1.93266									en11081	GSE145097_2_CPT 6uM, 24 hours_MCF7_CPT 6uM, 24 hours
3	3	40.1727		0.0293012	1.00688	23.6559	-0.971915									en11092	GSE145097_2_CPT 6uM, 24 hours_MCF7_CPT 6uM, 24 hours
3	3	40.1727		-0.0449166	0.736323		6.2453									en111187	GSE145097_2_CPT 6uM, 24 hours_MCF7_CPT 6uM, 24 hours
3	3	50.2159		0.653457	3.66564	1.06074	-1.37631									en111267	GSE145097_2_CPT 6uM, 24 hours_MCF7_CPT 6uM, 24 hours
3	3	20.0864		0.233193	1.5518	2.97242	-1.93266									en111326	GSE145097_2_CPT 6uM, 24 hours_MCF7_CPT 6uM, 24 hours
3	3	180.777		0.0331335	0.966515	20.9198	2.90496									en111399	GSE145097_2_CPT 6uM, 24 hours_MCF7_CPT 6uM, 24 hours
3	3	40.1727		0.17861	1.46509	3.8808	-3.14123									en111605	GSE145097_2_CPT 6uM, 24 hours_MCF7_CPT 6uM, 24 hours
3	3	70.3023		0.469904	2.51755	1.47508	-0.699105									en111606	GSE145097_2_CPT 6uM, 24 hours_MCF7_CPT 6uM, 24 hours
3	3	40.1727		0.262595	1.77468	2.63961	2.2746									en111620	GSE145097_2_CPT 6uM, 24 hours_MCF7_CPT 6uM, 24 hours
3	3	60.2591		0.295644	1.71824	2.34453	2.71228									en111632	GSE145097_2_CPT 6uM, 24 hours_MCF7_CPT 6uM, 24 hours
3	3	80.3455		-0.0828427	0.654414		6.77439									en111654	GSE145097_2_CPT 6uM, 24 hours_MCF7_CPT 6uM, 24 hours
3	3	130.561		0.0933655	1.19754	7.42402	-12.49									en111769	GSE145097_2_CPT 6uM, 24 hours_MCF7_CPT 6uM, 24 hours
3	3	522.246		0.171532	1.32774	4.04092	1.78697									en111770	GSE145097_2_CPT 6uM, 24 hours_MCF7_CPT 6uM, 24 hours
3	3	140.605		0.325399	1.85276	2.13014	0.971738									en111772	GSE145097_2_CPT 6uM, 24 hours_MCF7_CPT 6uM, 24 hours
3	3	110.475		0.0659484	1.03156	10.5104	3.35297									en111773	GSE145097_2_CPT 6uM, 24 hours_MCF7_CPT 6uM, 24 hours
3	3	291.252		-0.00661451	0.96352		-5.95263									en111774	GSE145097_2_CPT 6uM, 24 hours_MCF7_CPT 6uM, 24 hours
3	3	281.209		0.155668	1.38737	4.45274	-6.0797									en111775	GSE145097_2_CPT 6uM, 24 hours_MCF7_CPT 6uM, 24 hours
3	3	291.252		0.273197	1.743	2.53717	-7.62747									en111776	GSE145097_2_CPT 6uM, 24 hours_MCF7_CPT 6uM, 24 hours
3	3	331.425		0.0800242	1.15319	8.66172	-6.71559									en111780	GSE145097_2_CPT 6uM, 24 hours_MCF7_CPT 6uM, 24 hours
3	3	20.0864		0.0370085	0.936059	18.7294	4.84016									en111809	GSE145097_2_CPT 6uM, 24 hours_MCF7_CPT 6uM, 24 hours
3	3	40.1727		0.262595	1.77468	2.63961	2.2746									en111819	GSE145097_2_CPT 6uM, 24 hours_MCF7_CPT 6uM, 24 hours
3	3	40.1727		0.348288	2.01907	1.99016	-8.8788									en111821	GSE145097_2_CPT 6uM, 24 hours_MCF7_CPT 6uM, 24 hours
3	3	20.0864		0.233193	1.5518	2.97242	-1.93266									en112058	GSE145097_2_CPT 6uM, 24 hours_MCF7_CPT 6uM, 24 hours
3	3	30.1296		-0.0604795	0.755449		4.40961									en112410	GSE145097_2_CPT 6uM, 24 hours_MCF7_CPT 6uM, 24 hours
3	3	30.1296		0.254387	1.70548	2.72478	-1.87751									en112477	GSE145097_2_CPT 6uM, 24 hours_MCF7_CPT 6uM, 24 hours
3	3	40.1727		0.100654	1.21211	6.88641	-10.4425									en112610	GSE145097_2_CPT 6uM, 24 hours_MCF7_CPT 6uM, 24 hours
3	3	70.3023		0.141837	1.38574	4.88693	-0.356501									en112623	GSE145097_2_CPT 6uM, 24 hours_MCF7_CPT 6uM, 24 hours
3	3	642.764		4.61893e-05	0.957028	15006.7	-2.27783									en112709	GSE145097_2_CPT 6uM, 24 hours_MCF7_CPT 6uM, 24 hours
3	3	411.771		0.0538696	1.09538	12.8671	-7.36298									en112717	GSE145097_2_CPT 6uM, 24 hours_MCF7_CPT 6uM, 24 hours
3	3	311.339		0.0474224	1.05372	14.6165	-1.89343									en112718	GSE145097_2_CPT 6uM, 24 hours_MCF7_CPT 6uM, 24 hours
3	3	421.814		0.133928	1.3889	5.17552	1.71151									en112719	GSE145097_2_CPT 6uM, 24 hours_MCF7_CPT 6uM, 24 hours
3	3	140.605		0.088221	1.07733	7.85694	3.71147									en112720	GSE145097_2_CPT 6uM, 24 hours_MCF7_CPT 6uM, 24 hours
3	3	1154.97		0.072919	1.1619	9.50572	-15.2879									en112850	GSE145097_2_CPT 6uM, 24 hours_MCF7_CPT 6uM, 24 hours
3	3	60.2591		0.117192	1.29656	5.91464	-3.86949									en112852	GSE145097_2_CPT 6uM, 24 hours_MCF7_CPT 6uM, 24 hours
3	3	100.432		0.110806	1.2632	6.25552	-8.46138									en113071	GSE145097_2_CPT 6uM, 24 hours_MCF7_CPT 6uM, 24 hours
3	3	80.3455		0.0327057	0.970451	21.1934	2.61242									en113476	GSE145097_2_CPT 6uM, 24 hours_MCF7_CPT 6uM, 24 hours
3	3	40.1727		0.233193	1.5518	2.97242	-1.93266									en113478	GSE145097_2_CPT 6uM, 24 hours_MCF7_CPT 6uM, 24 hours
3	3	100.432		0.278153	1.72378	2.49196	-6.13104									en113517	GSE145097_2_CPT 6uM, 24 hours_MCF7_CPT 6uM, 24 hours
3	3	50.2159		0.471564	2.48475	1.46989	3.4258									en113518	GSE145097_2_CPT 6uM, 24 hours_MCF7_CPT 6uM, 24 hours
3	3	100.432		0.129128	1.36165	5.3679	0.505798									en113519	GSE145097_2_CPT 6uM, 24 hours_MCF7_CPT 6uM, 24 hours
3	3	70.3023		0.11552	1.07234	6.00026	6.65806									en113947	GSE145097_2_CPT 6uM, 24 hours_MCF7_CPT 6uM, 24 hours
3	3	100.432		0.133524	1.25399	5.1912	-0.990628									en113948	GSE145097_2_CPT 6uM, 24 hours_MCF7_CPT 6uM, 24 hours
3	3	50.2159		0.430956	2.36687	1.60839	-24.6169									en1144	GSE145097_2_CPT 6uM, 24 hours_MCF7_CPT 6uM, 24 hours
3	3	60.2591		0.295644	1.71824	2.34453	2.71228									en114738	GSE145097_2_CPT 6uM, 24 hours_MCF7_CPT 6uM, 24 hours
3	3	50.2159		0.303528	1.68932	2.28364	5.77014									en11477	GSE145097_2_CPT 6uM, 24 hours_MCF7_CPT 6uM, 24 hours
3	3	20.0864		0.233193	1.5518	2.97242	-1.93266									en11478	GSE145097_2_CPT 6uM, 24 hours_MCF7_CPT 6uM, 24 hours
3	3	50.2159		0.328398	1.97812	2.11069	-0.580319									en114790	GSE145097_2_CPT 6uM, 24 hours_MCF7_CPT 6uM, 24 hours
3	3	20.0864		-0.48116	0.145689		9.75562									en11495	GSE145097_2_CPT 6uM, 24 hours_MCF7_CPT 6uM, 24 hours
3	3	20.0864		-0.119114	0.582147		7.22356									en11594	GSE145097_2_CPT 6uM, 24 hours_MCF7_CPT 6uM, 24 hours
3	3	20.0864		0.0370085	0.936059	18.7294	4.84016									en116023	GSE145097_2_CPT 6uM, 24 hours_MCF7_CPT 6uM, 24 hours
3	3	70.3023		0.10176	1.25774	6.81158	-3.97005									en116024	GSE145097_2_CPT 6uM, 24 hours_MCF7_CPT 6uM, 24 hours
3	3	60.2591		0.154997	1.14347	4.47201	7.69892									en116050	GSE145097_2_CPT 6uM, 24 hours_MCF7_CPT 6uM, 24 hours
3	3	30.1296		0.0448882	0.895156	15.4416	6.91569									en11609	GSE145097_2_CPT 6uM, 24 hours_MCF7_CPT 6uM, 24 hours
3	3	80.3455		-0.229062	0.456349		6.59277									en116099	GSE145097_2_CPT 6uM, 24 hours_MCF7_CPT 6uM, 24 hours
3	3	30.1296		-0.0842688	0.599935		8.21007									en116180	GSE145097_2_CPT 6uM, 24 hours_MCF7_CPT 6uM, 24 hours
3	3	140.605		0.224786	1.58344	3.08359	-7.88953									en116792	GSE145097_2_CPT 6uM, 24 hours_MCF7_CPT 6uM, 24 hours
3	3	391.684		-0.0104891	0.94488		-3.63121									en116797	GSE145097_2_CPT 6uM, 24 hours_MCF7_CPT 6uM, 24 hours
3	3	30.1296		0.254387	1.70548	2.72478	-1.87751									en116825	GSE145097_2_CPT 6uM, 24 hours_MCF7_CPT 6uM, 24 hours
3	3	20.0864		-0.251814	0.366054		8.49363									en116961	GSE145097_2_CPT 6uM, 24 hours_MCF7_CPT 6uM, 24 hours
3	3	50.2159		0.0413637	0.910646	16.7574	6.1695									en117299	GSE145097_2_CPT 6uM, 24 hours_MCF7_CPT 6uM, 24 hours
3	3	20.0864		-0.48116	0.145689		9.75562									en117437	GSE145097_2_CPT 6uM, 24 hours_MCF7_CPT 6uM, 24 hours
3	3	70.3023		0.0478012	0.88503	14.5006	7.39686									en118405	GSE145097_2_CPT 6uM, 24 hours_MCF7_CPT 6uM, 24 hours
3	3	532.289		0.0401377	1.03128	17.2692	-1.0981									en118408	GSE145097_2_CPT 6uM, 24 hours_MCF7_CPT 6uM, 24 hours
3	3	281.209		0.0823867	1.19867	8.41334	-6.96202									en118409	GSE145097_2_CPT 6uM, 24 hours_MCF7_CPT 6uM, 24 hours
3	3	311.339		-0.040078	0.891514		-4.14871									en118420	GSE145097_2_CPT 6uM, 24 hours_MCF7_CPT 6uM, 24 hours
3	3	773.325		0.0614955	1.01917	11.2715	3.47193									en118421	GSE145097_2_CPT 6uM, 24 hours_MCF7_CPT 6uM, 24 hours
3	3	100.432		0.0822935	1.1763	8.42287	-19.0535									en118422	GSE145097_2_CPT 6uM, 24 hours_MCF7_CPT 6uM, 24 hours
3	3	70.3023		0.186162	1.41542	3.72336	-3.12887									en118441	GSE145097_2_CPT 6uM, 24 hours_MCF7_CPT 6uM, 24 hours
3	3	130.561		0.24863	1.6606	2.78786	-7.57851									en118738	GSE145097_2_CPT 6uM, 24 hours_MCF7_CPT 6uM, 24 hours
3	3	120.518		-0.0158986	0.86062		3.24589									en118776	GSE145097_2_CPT 6uM, 24 hours_MCF7_CPT 6uM, 24 hours
3	3	40.1727		0.536003	2.88371	1.29318	-0.864698									en118928	GSE145097_2_CPT 6uM, 24 hours_MCF7_CPT 6uM, 24 hours
3	3	251.08		0.00773272	0.9531	89.6382	-0.0433821									en118931	GSE145097_2_CPT 6uM, 24 hours_MCF7_CPT 6uM, 24 hours
3	3	40.1727		0.100654	1.21211	6.88641	-10.4425									en118932	GSE145097_2_CPT 6uM, 24 hours_MCF7_CPT 6uM, 24 hours
3	3	70.3023		0.248996	1.4523	2.78377	7.22118									en119019	GSE145097_2_CPT 6uM, 24 hours_MCF7_CPT 6uM, 24 hours
3	3	140.605		0.202186	1.44043	3.42827	-0.17091									en119074	GSE145097_2_CPT 6uM, 24 hours_MCF7_CPT 6uM, 24 hours
3	3	281.209		0.0993325	1.16592	6.97805	-0.857306									en119213	GSE145097_2_CPT 6uM, 24 hours_MCF7_CPT 6uM, 24 hours
3	3	502.159		0.148886	1.37729	4.65556	-4.18178									en119223	GSE145097_2_CPT 6uM, 24 hours_MCF7_CPT 6uM, 24 hours
3	3	60.2591		0.0971113	1.10319	7.13766	3.48887									en119232	GSE145097_2_CPT 6uM, 24 hours_MCF7_CPT 6uM, 24 hours
3	3	291.252		0.0694033	1.10937	9.98724	-2.75281									en119233	GSE145097_2_CPT 6uM, 24 hours_MCF7_CPT 6uM, 24 hours
3	3	50.2159		0.266941	1.81427	2.59663	3.84848									en119392	GSE145097_2_CPT 6uM, 24 hours_MCF7_CPT 6uM, 24 hours
3	3	60.2591		-0.0604795	0.755449		4.40961									en11966	GSE145097_2_CPT 6uM, 24 hours_MCF7_CPT 6uM, 24 hours
3	3	261.123		0.0693951	1.06788	9.98841	1.55172									en119959	GSE145097_2_CPT 6uM, 24 hours_MCF7_CPT 6uM, 24 hours
3	3	60.2591		-0.105178	0.509741		9.46889									en120119	GSE145097_2_CPT 6uM, 24 hours_MCF7_CPT 6uM, 24 hours
3	3	341.468		-0.0712667	0.78088		1.93261									en12015	GSE145097_2_CPT 6uM, 24 hours_MCF7_CPT 6uM, 24 hours
3	3	30.1296		0.398109	2.17151	1.7411	-0.673856									en12028	GSE145097_2_CPT 6uM, 24 hours_MCF7_CPT 6uM, 24 hours
3	3	50.2159		0.653457	3.66564	1.06074	-1.37631									en12035	GSE145097_2_CPT 6uM, 24 hours_MCF7_CPT 6uM, 24 hours
3	3	50.2159		0.169825	1.37209	4.08154	-3.75941									en120853	GSE145097_2_CPT 6uM, 24 hours_MCF7_CPT 6uM, 24 hours
3	3	20.0864		0.233193	1.5518	2.97242	-1.93266									en120911	GSE145097_2_CPT 6uM, 24 hours_MCF7_CPT 6uM, 24 hours
3	3	40.1727		0.0370085	0.936059	18.7294	4.84016									en120912	GSE145097_2_CPT 6uM, 24 hours_MCF7_CPT 6uM, 24 hours
3	3	170.734		0.237669	1.50356	2.91644	3.52144									en12104	GSE145097_2_CPT 6uM, 24 hours_MCF7_CPT 6uM, 24 hours
3	3	90.3887		-0.12327	0.526067		8.52591									en121223	GSE145097_2_CPT 6uM, 24 hours_MCF7_CPT 6uM, 24 hours
3	3	50.2159		-0.100014	0.589363		7.83799									en121253	GSE145097_2_CPT 6uM, 24 hours_MCF7_CPT 6uM, 24 hours
3	3	30.1296		0.0314863	0.982405	22.0143	1.63799									en121434	GSE145097_2_CPT 6uM, 24 hours_MCF7_CPT 6uM, 24 hours
3	3	150.648		0.184072	1.33555	3.76564	3.59301									en121483	GSE145097_2_CPT 6uM, 24 hours_MCF7_CPT 6uM, 24 hours
3	3	70.3023		0.156054	1.25537	4.44171	3.59464									en121503	GSE145097_2_CPT 6uM, 24 hours_MCF7_CPT 6uM, 24 hours
3	3	140.605		-0.0546205	0.853642		-2.28019									en121644	GSE145097_2_CPT 6uM, 24 hours_MCF7_CPT 6uM, 24 hours
3	3	100.432		0.378441	2.06239	1.83159	1.70761									en121663	GSE145097_2_CPT 6uM, 24 hours_MCF7_CPT 6uM, 24 hours
3	3	120.518		0.278863	1.76424	2.48562	-7.04507									en121685	GSE145097_2_CPT 6uM, 24 hours_MCF7_CPT 6uM, 24 hours
3	3	60.2591		0.2168	1.63703	3.19717	2.79625									en121688	GSE145097_2_CPT 6uM, 24 hours_MCF7_CPT 6uM, 24 hours
3	3	100.432		0.102153	1.27587	6.78535	-1.39488									en121824	GSE145097_2_CPT 6uM, 24 hours_MCF7_CPT 6uM, 24 hours
3	3	522.246		0.0431041	1.06605	16.0808	-5.77398									en121892	GSE145097_2_CPT 6uM, 24 hours_MCF7_CPT 6uM, 24 hours
3	3	20.0864		-0.371136	0.230437		9.26236									en121990	GSE145097_2_CPT 6uM, 24 hours_MCF7_CPT 6uM, 24 hours
3	3	30.1296		0.0448882	0.895156	15.4416	6.91569									en121993	GSE145097_2_CPT 6uM, 24 hours_MCF7_CPT 6uM, 24 hours
3	3	70.3023		-0.33747	0.327749		7.25833									en122167	GSE145097_2_CPT 6uM, 24 hours_MCF7_CPT 6uM, 24 hours
3	3	50.2159		0.430956	2.36687	1.60839	-24.6169									en122171	GSE145097_2_CPT 6uM, 24 hours_MCF7_CPT 6uM, 24 hours
3	3	30.1296		0.398109	2.17151	1.7411	-0.673856									en122248	GSE145097_2_CPT 6uM, 24 hours_MCF7_CPT 6uM, 24 hours
3	3	30.1296		-0.142681	0.584803		6.01508									en122297	GSE145097_2_CPT 6uM, 24 hours_MCF7_CPT 6uM, 24 hours
3	3	60.2591		-0.0902161	0.741293		2.4468									en122300	GSE145097_2_CPT 6uM, 24 hours_MCF7_CPT 6uM, 24 hours
3	3	70.3023		0.190892	1.3099	3.63109	5.6984									en122401	GSE145097_2_CPT 6uM, 24 hours_MCF7_CPT 6uM, 24 hours
3	3	140.605		0.0762896	1.09813	9.08574	0.394388									en122409	GSE145097_2_CPT 6uM, 24 hours_MCF7_CPT 6uM, 24 hours
3	3	40.1727		0.0293012	1.00688	23.6559	-0.971915									en122859	GSE145097_2_CPT 6uM, 24 hours_MCF7_CPT 6uM, 24 hours
3	3	50.2159		0.0541303	0.869411	12.8052	8.17583									en12307	GSE145097_2_CPT 6uM, 24 hours_MCF7_CPT 6uM, 24 hours
3	3	50.2159		0.123586	1.1423	5.60864	4.8364									en12308	GSE145097_2_CPT 6uM, 24 hours_MCF7_CPT 6uM, 24 hours
3	3	30.1296		0.0448882	0.895156	15.4416	6.91569									en123112	GSE145097_2_CPT 6uM, 24 hours_MCF7_CPT 6uM, 24 hours
3	3	40.1727		0.262595	1.77468	2.63961	2.2746									en12312	GSE145097_2_CPT 6uM, 24 hours_MCF7_CPT 6uM, 24 hours
3	3	70.3023		-0.0117412	0.788759		6.56735									en12319	GSE145097_2_CPT 6uM, 24 hours_MCF7_CPT 6uM, 24 hours
3	3	40.1727		0.536003	2.88371	1.29318	-0.864698									en12321	GSE145097_2_CPT 6uM, 24 hours_MCF7_CPT 6uM, 24 hours
3	3	90.3887		-0.154524	0.592957		5.03806									en124587	GSE145097_2_CPT 6uM, 24 hours_MCF7_CPT 6uM, 24 hours
3	3	40.1727		-0.251814	0.366054		8.49363									en124648	GSE145097_2_CPT 6uM, 24 hours_MCF7_CPT 6uM, 24 hours
3	3	281.209		-0.00893914	0.894346		2.00673									en12489	GSE145097_2_CPT 6uM, 24 hours_MCF7_CPT 6uM, 24 hours
3	3	20.0864		0.233193	1.5518	2.97242	-1.93266									en124956	GSE145097_2_CPT 6uM, 24 hours_MCF7_CPT 6uM, 24 hours
3	3	180.777		0.163796	1.35662	4.23178	-4.0345									en12502	GSE145097_2_CPT 6uM, 24 hours_MCF7_CPT 6uM, 24 hours
3	3	30.1296		0.254387	1.70548	2.72478	-1.87751									en125115	GSE145097_2_CPT 6uM, 24 hours_MCF7_CPT 6uM, 24 hours
3	3	30.1296		0.254387	1.70548	2.72478	-1.87751									en125223	GSE145097_2_CPT 6uM, 24 hours_MCF7_CPT 6uM, 24 hours
3	3	80.3455		0.090722	1.23083	7.64034	-4.01478									en125227	GSE145097_2_CPT 6uM, 24 hours_MCF7_CPT 6uM, 24 hours
3	3	80.3455		-0.0359557	0.839962		2.19895									en125237	GSE145097_2_CPT 6uM, 24 hours_MCF7_CPT 6uM, 24 hours
3	3	40.1727		0.0370085	0.936059	18.7294	4.84016									en125383	GSE145097_2_CPT 6uM, 24 hours_MCF7_CPT 6uM, 24 hours
3	3	30.1296		0.202326	1.36925	3.4259	4.65732									en125472	GSE145097_2_CPT 6uM, 24 hours_MCF7_CPT 6uM, 24 hours
3	3	30.1296		0.202326	1.36925	3.4259	4.65732									en125524	GSE145097_2_CPT 6uM, 24 hours_MCF7_CPT 6uM, 24 hours
3	3	40.1727		0.181323	1.26284	3.82271	6.37376									en125972	GSE145097_2_CPT 6uM, 24 hours_MCF7_CPT 6uM, 24 hours
3	3	60.2591		0.0370085	0.936059	18.7294	4.84016									en126303	GSE145097_2_CPT 6uM, 24 hours_MCF7_CPT 6uM, 24 hours
3	3	70.3023		-0.0522365	0.743237		5.52725									en12693	GSE145097_2_CPT 6uM, 24 hours_MCF7_CPT 6uM, 24 hours
3	3	30.1296		0.202326	1.36925	3.4259	4.65732									en126946	GSE145097_2_CPT 6uM, 24 hours_MCF7_CPT 6uM, 24 hours
3	3	30.1296		0.254387	1.70548	2.72478	-1.87751									en126973	GSE145097_2_CPT 6uM, 24 hours_MCF7_CPT 6uM, 24 hours
3	3	40.1727		-0.251814	0.366054		8.49363									en126990	GSE145097_2_CPT 6uM, 24 hours_MCF7_CPT 6uM, 24 hours
3	3	20.0864		-0.251814	0.366054		8.49363									en127569	GSE145097_2_CPT 6uM, 24 hours_MCF7_CPT 6uM, 24 hours
3	3	391.684		0.0433008	1.11879	16.0077	-4.77491									en128160	GSE145097_2_CPT 6uM, 24 hours_MCF7_CPT 6uM, 24 hours
3	3	30.1296		-0.0842688	0.599935		8.21007									en128167	GSE145097_2_CPT 6uM, 24 hours_MCF7_CPT 6uM, 24 hours
3	3	40.1727		-0.388108	0.254186		8.30714									en128173	GSE145097_2_CPT 6uM, 24 hours_MCF7_CPT 6uM, 24 hours
3	3	60.2591		0.233193	1.5518	2.97242	-1.93266									en128472	GSE145097_2_CPT 6uM, 24 hours_MCF7_CPT 6uM, 24 hours
3	3	180.777		0.133133	1.34759	5.20642	-2.21362									en128480	GSE145097_2_CPT 6uM, 24 hours_MCF7_CPT 6uM, 24 hours
3	3	40.1727		-0.0449166	0.736323		6.2453									en12865	GSE145097_2_CPT 6uM, 24 hours_MCF7_CPT 6uM, 24 hours
3	3	120.518		0.0293012	1.00688	23.6559	-0.971915									en12882	GSE145097_2_CPT 6uM, 24 hours_MCF7_CPT 6uM, 24 hours
3	3	20.0864		0.0370085	0.936059	18.7294	4.84016									en129635	GSE145097_2_CPT 6uM, 24 hours_MCF7_CPT 6uM, 24 hours
3	3	30.1296		0.254387	1.70548	2.72478	-1.87751									en129647	GSE145097_2_CPT 6uM, 24 hours_MCF7_CPT 6uM, 24 hours
3	3	170.734		0.237501	1.58068	2.91851	-4.5544									en130814	GSE145097_2_CPT 6uM, 24 hours_MCF7_CPT 6uM, 24 hours
3	3	50.2159		-0.100014	0.589363		7.83799									en130816	GSE145097_2_CPT 6uM, 24 hours_MCF7_CPT 6uM, 24 hours
3	3	20.0864		0.0370085	0.936059	18.7294	4.84016									en130901	GSE145097_2_CPT 6uM, 24 hours_MCF7_CPT 6uM, 24 hours
3	3	40.1727		0.348288	2.01907	1.99016	-8.8788									en131624	GSE145097_2_CPT 6uM, 24 hours_MCF7_CPT 6uM, 24 hours
3	3	2802.05		-0.00621484	0.964392		-5.97409									en132046	GSE145097_2_CPT 6uM, 24 hours_MCF7_CPT 6uM, 24 hours
3	3	30.1296		-0.217629	0.454669		7.08335									en132451	GSE145097_2_CPT 6uM, 24 hours_MCF7_CPT 6uM, 24 hours
3	3	40.1727		0.0502463	0.878056	13.795	7.73388									en132570	GSE145097_2_CPT 6uM, 24 hours_MCF7_CPT 6uM, 24 hours
3	3	40.1727		0.348288	2.01907	1.99016	-8.8788									en132695	GSE145097_2_CPT 6uM, 24 hours_MCF7_CPT 6uM, 24 hours
3	3	20.0864		-0.119114	0.582147		7.22356									en133154	GSE145097_2_CPT 6uM, 24 hours_MCF7_CPT 6uM, 24 hours
3	3	30.1296		-0.142681	0.584803		6.01508									en133246	GSE145097_2_CPT 6uM, 24 hours_MCF7_CPT 6uM, 24 hours
3	3	90.3887		-0.0383729	0.732672		6.7486									en133253	GSE145097_2_CPT 6uM, 24 hours_MCF7_CPT 6uM, 24 hours
3	3	30.1296		0.398109	2.17151	1.7411	-0.673856									en133290	GSE145097_2_CPT 6uM, 24 hours_MCF7_CPT 6uM, 24 hours
3	3	90.3887		0.173214	1.22459	4.00168	6.84993									en133354	GSE145097_2_CPT 6uM, 24 hours_MCF7_CPT 6uM, 24 hours
3	3	40.1727		-0.0960155	0.703282		4.04437									en133356	GSE145097_2_CPT 6uM, 24 hours_MCF7_CPT 6uM, 24 hours
3	3	20.0864		0.233193	1.5518	2.97242	-1.93266									en133359	GSE145097_2_CPT 6uM, 24 hours_MCF7_CPT 6uM, 24 hours
3	3	30.1296		0.254387	1.70548	2.72478	-1.87751									en133879	GSE145097_2_CPT 6uM, 24 hours_MCF7_CPT 6uM, 24 hours
3	3	60.2591		0.193593	1.48177	3.58044	-11.4108									en133887	GSE145097_2_CPT 6uM, 24 hours_MCF7_CPT 6uM, 24 hours
3	3	70.3023		0.0714676	1.11158	9.69876	-2.37523									en133890	GSE145097_2_CPT 6uM, 24 hours_MCF7_CPT 6uM, 24 hours
3	3	70.3023		0.248996	1.4523	2.78377	7.22118									en133976	GSE145097_2_CPT 6uM, 24 hours_MCF7_CPT 6uM, 24 hours
3	3	20.0864		0.233193	1.5518	2.97242	-1.93266									en134025	GSE145097_2_CPT 6uM, 24 hours_MCF7_CPT 6uM, 24 hours
3	3	2299.89		-0.0469314	0.867123		-2.22912									en134071	GSE145097_2_CPT 6uM, 24 hours_MCF7_CPT 6uM, 24 hours
3	3	210.907		0.0279181	1.02477	24.8279	-3.93077									en134072	GSE145097_2_CPT 6uM, 24 hours_MCF7_CPT 6uM, 24 hours
3	3	90.3887		0.0349632	0.95104	19.8251	3.95033									en134078	GSE145097_2_CPT 6uM, 24 hours_MCF7_CPT 6uM, 24 hours
3	3	281.209		-0.0589691	0.808688		1.47119									en134080	GSE145097_2_CPT 6uM, 24 hours_MCF7_CPT 6uM, 24 hours
3	3	30.1296		-0.0604795	0.755449		4.40961									en134083	GSE145097_2_CPT 6uM, 24 hours_MCF7_CPT 6uM, 24 hours
3	3	40.1727		0.348288	2.01907	1.99016	-8.8788									en134084	GSE145097_2_CPT 6uM, 24 hours_MCF7_CPT 6uM, 24 hours
3	3	50.2159		0.0987287	1.14726	7.02073	0.804086									en134536	GSE145097_2_CPT 6uM, 24 hours_MCF7_CPT 6uM, 24 hours
3	3	40.1727		0.344158	1.884	2.01404	4.08951									en134538	GSE145097_2_CPT 6uM, 24 hours_MCF7_CPT 6uM, 24 hours
3	3	60.2591		-0.0902161	0.741293		2.4468									en134539	GSE145097_2_CPT 6uM, 24 hours_MCF7_CPT 6uM, 24 hours
3	3	50.2159		-0.0224481	0.889915		0.30494									en134769	GSE145097_2_CPT 6uM, 24 hours_MCF7_CPT 6uM, 24 hours
3	3	90.3887		0.0824352	1.2111	8.40839	-4.03199									en134775	GSE145097_2_CPT 6uM, 24 hours_MCF7_CPT 6uM, 24 hours
3	3	361.555		0.0383321	1.10307	18.0827	-5.92892									en134777	GSE145097_2_CPT 6uM, 24 hours_MCF7_CPT 6uM, 24 hours
3	3	40.1727		0.181323	1.26284	3.82271	6.37376									en134779	GSE145097_2_CPT 6uM, 24 hours_MCF7_CPT 6uM, 24 hours
3	3	20.0864		-0.251814	0.366054		8.49363									en134928	GSE145097_2_CPT 6uM, 24 hours_MCF7_CPT 6uM, 24 hours
3	3	100.432		0.121087	1.25532	5.72436	-7.16692									en134929	GSE145097_2_CPT 6uM, 24 hours_MCF7_CPT 6uM, 24 hours
3	3	251.08		0.0334839	0.963385	20.7009	3.12913									en135015	GSE145097_2_CPT 6uM, 24 hours_MCF7_CPT 6uM, 24 hours
3	3	60.2591		-0.320195	0.313447		8.1489									en135127	GSE145097_2_CPT 6uM, 24 hours_MCF7_CPT 6uM, 24 hours
3	3	60.2591		0.398109	2.17151	1.7411	-0.673856									en135387	GSE145097_2_CPT 6uM, 24 hours_MCF7_CPT 6uM, 24 hours
3	3	70.3023		0.248996	1.4523	2.78377	7.22118									en135488	GSE145097_2_CPT 6uM, 24 hours_MCF7_CPT 6uM, 24 hours
3	3	301.296		0.130657	1.21793	5.30508	1.62794									en135642	GSE145097_2_CPT 6uM, 24 hours_MCF7_CPT 6uM, 24 hours
3	3	40.1727		-0.0598774	0.62286		8.63727									en135644	GSE145097_2_CPT 6uM, 24 hours_MCF7_CPT 6uM, 24 hours
3	3	70.3023		0.0301996	0.996307	22.9522	0.287494									en135764	GSE145097_2_CPT 6uM, 24 hours_MCF7_CPT 6uM, 24 hours
3	3	391.684		0.0708558	1.17975	9.78251	-4.9264									en135843	GSE145097_2_CPT 6uM, 24 hours_MCF7_CPT 6uM, 24 hours
3	3	30.1296		0.0448882	0.895156	15.4416	6.91569									en136139	GSE145097_2_CPT 6uM, 24 hours_MCF7_CPT 6uM, 24 hours
3	3	90.3887		0.136047	1.28914	5.0949	-5.74566									en136140	GSE145097_2_CPT 6uM, 24 hours_MCF7_CPT 6uM, 24 hours
3	3	110.475		0.360492	1.96725	1.92278	3.12518									en136363	GSE145097_2_CPT 6uM, 24 hours_MCF7_CPT 6uM, 24 hours
3	3	30.1296		-0.301346	0.27073		9.60616									en13645	GSE145097_2_CPT 6uM, 24 hours_MCF7_CPT 6uM, 24 hours
3	3	90.3887		-0.000609472	0.782047		7.41865									en13651	GSE145097_2_CPT 6uM, 24 hours_MCF7_CPT 6uM, 24 hours
3	3	20.0864		-0.119114	0.582147		7.22356									en136893	GSE145097_2_CPT 6uM, 24 hours_MCF7_CPT 6uM, 24 hours
3	3	30.1296		-0.142681	0.584803		6.01508									en137099	GSE145097_2_CPT 6uM, 24 hours_MCF7_CPT 6uM, 24 hours
3	3	30.1296		0.136047	1.28914	5.0949	-5.74566									en137168	GSE145097_2_CPT 6uM, 24 hours_MCF7_CPT 6uM, 24 hours
3	3	562.418		-0.069313	0.796008		1.05342									en137317	GSE145097_2_CPT 6uM, 24 hours_MCF7_CPT 6uM, 24 hours
3	3	652.807		0.0203736	0.995352	34.0219	-1.8476									en137374	GSE145097_2_CPT 6uM, 24 hours_MCF7_CPT 6uM, 24 hours
3	3	4589.74		0.0155947	1.02206	44.4476	-11.2679									en137375	GSE145097_2_CPT 6uM, 24 hours_MCF7_CPT 6uM, 24 hours
3	3	40.1727		0.17861	1.46509	3.8808	-3.14123									en137586	GSE145097_2_CPT 6uM, 24 hours_MCF7_CPT 6uM, 24 hours
3	3	30.1296		-0.287115	0.354574		7.84559									en137630	GSE145097_2_CPT 6uM, 24 hours_MCF7_CPT 6uM, 24 hours
3	3	100.432		0.0987287	1.14726	7.02073	0.804086									en13780	GSE145097_2_CPT 6uM, 24 hours_MCF7_CPT 6uM, 24 hours
3	3	210.907		0.0403788	1.05912	17.1661	-5.52936									en137997	GSE145097_2_CPT 6uM, 24 hours_MCF7_CPT 6uM, 24 hours
3	3	20.0864		-0.48116	0.145689		9.75562									en138000	GSE145097_2_CPT 6uM, 24 hours_MCF7_CPT 6uM, 24 hours
3	3	100.432		-0.146499	0.58683		5.73895									en13807	GSE145097_2_CPT 6uM, 24 hours_MCF7_CPT 6uM, 24 hours
3	3	472.03		-0.0561119	0.769942		4.08867									en138083	GSE145097_2_CPT 6uM, 24 hours_MCF7_CPT 6uM, 24 hours
3	3	20.0864		0.233193	1.5518	2.97242	-1.93266									en13809	GSE145097_2_CPT 6uM, 24 hours_MCF7_CPT 6uM, 24 hours
3	3	20.0864		-0.119114	0.582147		7.22356									en138135	GSE145097_2_CPT 6uM, 24 hours_MCF7_CPT 6uM, 24 hours
3	3	120.518		0.0761468	1.13888	9.10278	-5.34538									en13820	GSE145097_2_CPT 6uM, 24 hours_MCF7_CPT 6uM, 24 hours
3	3	20.0864		-0.48116	0.145689		9.75562									en138280	GSE145097_2_CPT 6uM, 24 hours_MCF7_CPT 6uM, 24 hours
3	3	843.628		0.00413018	0.902435	167.825	3.11932									en138533	GSE145097_2_CPT 6uM, 24 hours_MCF7_CPT 6uM, 24 hours
3	3	110.475		-0.0606011	0.803829		1.6181									en138534	GSE145097_2_CPT 6uM, 24 hours_MCF7_CPT 6uM, 24 hours
3	3	30.1296		0.254387	1.70548	2.72478	-1.87751									en13882	GSE145097_2_CPT 6uM, 24 hours_MCF7_CPT 6uM, 24 hours
3	3	60.2591		0.586925	3.17051	1.18098	2.75049									en139250	GSE145097_2_CPT 6uM, 24 hours_MCF7_CPT 6uM, 24 hours
3	3	80.3455		0.0579839	1.13353	11.9541	-10.6803									en139489	GSE145097_2_CPT 6uM, 24 hours_MCF7_CPT 6uM, 24 hours
3	3	60.2591		0.2168	1.63703	3.19717	2.79625									en13957	GSE145097_2_CPT 6uM, 24 hours_MCF7_CPT 6uM, 24 hours
3	3	120.518		0.191049	1.54394	3.62811	1.62383									en13958	GSE145097_2_CPT 6uM, 24 hours_MCF7_CPT 6uM, 24 hours
3	3	50.2159		0.140286	1.35727	4.94095	-3.64818									en13960	GSE145097_2_CPT 6uM, 24 hours_MCF7_CPT 6uM, 24 hours
3	3	120.518		0.109623	1.30589	6.32303	-0.116062									en13962	GSE145097_2_CPT 6uM, 24 hours_MCF7_CPT 6uM, 24 hours
3	3	130.561		-0.0120886	0.878869		2.61097									en13966	GSE145097_2_CPT 6uM, 24 hours_MCF7_CPT 6uM, 24 hours
3	3	251.08		0.104054	1.19482	6.66145	-3.17911									en139686	GSE145097_2_CPT 6uM, 24 hours_MCF7_CPT 6uM, 24 hours
3	3	190.821		0.0423829	1.0573	16.3544	-4.20318									en13973	GSE145097_2_CPT 6uM, 24 hours_MCF7_CPT 6uM, 24 hours
3	3	30.1296		-0.400445	0.179313		9.99895									en13979	GSE145097_2_CPT 6uM, 24 hours_MCF7_CPT 6uM, 24 hours
3	3	50.2159		0.471564	2.48475	1.46989	3.4258									en139807	GSE145097_2_CPT 6uM, 24 hours_MCF7_CPT 6uM, 24 hours
3	3	20.0864		0.233193	1.5518	2.97242	-1.93266									en139837	GSE145097_2_CPT 6uM, 24 hours_MCF7_CPT 6uM, 24 hours
3	3	40.1727		-0.18759	0.461428		7.94411									en139839	GSE145097_2_CPT 6uM, 24 hours_MCF7_CPT 6uM, 24 hours
3	3	20.0864		0.0370085	0.936059	18.7294	4.84016									en139840	GSE145097_2_CPT 6uM, 24 hours_MCF7_CPT 6uM, 24 hours
3	3	30.1296		0.202326	1.36925	3.4259	4.65732									en139842	GSE145097_2_CPT 6uM, 24 hours_MCF7_CPT 6uM, 24 hours
3	3	190.821		-0.0224643	0.939956		-8.17276									en139852	GSE145097_2_CPT 6uM, 24 hours_MCF7_CPT 6uM, 24 hours
3	3	80.3455		0.299058	1.8653	2.31777	-1.08964									en139857	GSE145097_2_CPT 6uM, 24 hours_MCF7_CPT 6uM, 24 hours
3	3	20.0864		0.233193	1.5518	2.97242	-1.93266									en1399	GSE145097_2_CPT 6uM, 24 hours_MCF7_CPT 6uM, 24 hours
3	3	411.771		0.0815863	1.05358	8.49588	4.10495									en139928	GSE145097_2_CPT 6uM, 24 hours_MCF7_CPT 6uM, 24 hours
3	3	70.3023		0.160914	1.39003	4.30755	-10.6074									en139935	GSE145097_2_CPT 6uM, 24 hours_MCF7_CPT 6uM, 24 hours
3	3	30.1296		0.398109	2.17151	1.7411	-0.673856									en139951	GSE145097_2_CPT 6uM, 24 hours_MCF7_CPT 6uM, 24 hours
3	3	40.1727		0.100654	1.21211	6.88641	-10.4425									en139960	GSE145097_2_CPT 6uM, 24 hours_MCF7_CPT 6uM, 24 hours
3	3	30.1296		-0.352305	0.277306		8.41262									en139964	GSE145097_2_CPT 6uM, 24 hours_MCF7_CPT 6uM, 24 hours
3	3	40.1727		0.129074	1.1995	5.37017	2.60471									en14	GSE145097_2_CPT 6uM, 24 hours_MCF7_CPT 6uM, 24 hours
3	3	30.1296		0.0448882	0.895156	15.4416	6.91569									en140032	GSE145097_2_CPT 6uM, 24 hours_MCF7_CPT 6uM, 24 hours
3	3	311.339		0.0845779	1.11061	8.19537	1.00364									en140217	GSE145097_2_CPT 6uM, 24 hours_MCF7_CPT 6uM, 24 hours
3	3	50.2159		-0.0324926	0.731092		7.12202									en140222	GSE145097_2_CPT 6uM, 24 hours_MCF7_CPT 6uM, 24 hours
3	3	70.3023		0.0400173	0.917669	17.3212	5.81883									en140225	GSE145097_2_CPT 6uM, 24 hours_MCF7_CPT 6uM, 24 hours
3	3	180.777		0.0146374	0.957753	47.3545	0.804428									en140374	GSE145097_2_CPT 6uM, 24 hours_MCF7_CPT 6uM, 24 hours
3	3	100.432		0.0654067	1.05075	10.5975	2.11259									en140402	GSE145097_2_CPT 6uM, 24 hours_MCF7_CPT 6uM, 24 hours
3	3	30.1296		0.0314863	0.982405	22.0143	1.63799									en140406	GSE145097_2_CPT 6uM, 24 hours_MCF7_CPT 6uM, 24 hours
3	3	30.1296		0.0314863	0.982405	22.0143	1.63799									en140424	GSE145097_2_CPT 6uM, 24 hours_MCF7_CPT 6uM, 24 hours
3	3	30.1296		0.0314863	0.982405	22.0143	1.63799									en140508	GSE145097_2_CPT 6uM, 24 hours_MCF7_CPT 6uM, 24 hours
3	3	70.3023		-0.300652	0.318462		8.48612									en140510	GSE145097_2_CPT 6uM, 24 hours_MCF7_CPT 6uM, 24 hours
3	3	20.0864		-0.48116	0.145689		9.75562									en140511	GSE145097_2_CPT 6uM, 24 hours_MCF7_CPT 6uM, 24 hours
3	3	60.2591		0.388095	2.20282	1.78602	-3.3232									en140513	GSE145097_2_CPT 6uM, 24 hours_MCF7_CPT 6uM, 24 hours
3	3	20.0864		-0.119114	0.582147		7.22356									en140514	GSE145097_2_CPT 6uM, 24 hours_MCF7_CPT 6uM, 24 hours
3	3	110.475		-0.150516	0.536769		7.2153									en140523	GSE145097_2_CPT 6uM, 24 hours_MCF7_CPT 6uM, 24 hours
3	3	20.0864		-0.119114	0.582147		7.22356									en140524	GSE145097_2_CPT 6uM, 24 hours_MCF7_CPT 6uM, 24 hours
3	3	20.0864		0.233193	1.5518	2.97242	-1.93266									en140525	GSE145097_2_CPT 6uM, 24 hours_MCF7_CPT 6uM, 24 hours
3	3	80.3455		0.0718408	1.07852	9.64838	1.17195									en140532	GSE145097_2_CPT 6uM, 24 hours_MCF7_CPT 6uM, 24 hours
3	3	60.2591		0.2168	1.63703	3.19717	2.79625									en140746	GSE145097_2_CPT 6uM, 24 hours_MCF7_CPT 6uM, 24 hours
3	3	100.432		-0.252559	0.387197		7.91414									en140764	GSE145097_2_CPT 6uM, 24 hours_MCF7_CPT 6uM, 24 hours
3	3	30.1296		0.0314863	0.982405	22.0143	1.63799									en140799	GSE145097_2_CPT 6uM, 24 hours_MCF7_CPT 6uM, 24 hours
3	3	1737.47		-0.0533658	0.859223		-2.76615									en140807	GSE145097_2_CPT 6uM, 24 hours_MCF7_CPT 6uM, 24 hours
3	3	582.505		-0.0340317	0.841725		2.31744									en140808	GSE145097_2_CPT 6uM, 24 hours_MCF7_CPT 6uM, 24 hours
3	3	431.857		0.0240288	0.973755	28.8465	1.09403									en140811	GSE145097_2_CPT 6uM, 24 hours_MCF7_CPT 6uM, 24 hours
3	3	120.518		-0.10815	0.702346		3.05699									en140844	GSE145097_2_CPT 6uM, 24 hours_MCF7_CPT 6uM, 24 hours
3	3	20.0864		-0.48116	0.145689		9.75562									en140856	GSE145097_2_CPT 6uM, 24 hours_MCF7_CPT 6uM, 24 hours
3	3	100.432		0.0413637	0.910646	16.7574	6.1695									en140947	GSE145097_2_CPT 6uM, 24 hours_MCF7_CPT 6uM, 24 hours
3	3	291.252		0.0939007	1.11404	7.38171	2.38359									en140949	GSE145097_2_CPT 6uM, 24 hours_MCF7_CPT 6uM, 24 hours
3	3	30.1296		0.0314863	0.982405	22.0143	1.63799									en140950	GSE145097_2_CPT 6uM, 24 hours_MCF7_CPT 6uM, 24 hours
3	3	140.605		-0.0574442	0.82379		0.461246									en140953	GSE145097_2_CPT 6uM, 24 hours_MCF7_CPT 6uM, 24 hours
3	3	140.605		-0.161636	0.600878		4.22364									en140954	GSE145097_2_CPT 6uM, 24 hours_MCF7_CPT 6uM, 24 hours
3	3	40.1727		-0.371136	0.230437		9.26236									en140957	GSE145097_2_CPT 6uM, 24 hours_MCF7_CPT 6uM, 24 hours
3	3	30.1296		-0.673742	0.0517866		10.6127									en140958	GSE145097_2_CPT 6uM, 24 hours_MCF7_CPT 6uM, 24 hours
3	3	150.648		0.0114956	0.953476	60.2969	0.619836									en140974	GSE145097_2_CPT 6uM, 24 hours_MCF7_CPT 6uM, 24 hours
3	3	733.153		0.0186689	0.881205	37.1285	5.48066									en140975	GSE145097_2_CPT 6uM, 24 hours_MCF7_CPT 6uM, 24 hours
3	3	572.462		-0.0299278	0.861943		1.44263									en140976	GSE145097_2_CPT 6uM, 24 hours_MCF7_CPT 6uM, 24 hours
3	3	251.08		0.0855741	0.984357	8.09996	7.06399									en140977	GSE145097_2_CPT 6uM, 24 hours_MCF7_CPT 6uM, 24 hours
3	3	401.727		0.0587208	1.02263	11.8041	2.92315									en140978	GSE145097_2_CPT 6uM, 24 hours_MCF7_CPT 6uM, 24 hours
3	3	20.0864		0.0370085	0.936059	18.7294	4.84016									en140987	GSE145097_2_CPT 6uM, 24 hours_MCF7_CPT 6uM, 24 hours
3	3	40.1727		0.233193	1.5518	2.97242	-1.93266									en141044	GSE145097_2_CPT 6uM, 24 hours_MCF7_CPT 6uM, 24 hours
3	3	80.3455		-0.0719183	0.559051		9.54864									en141081	GSE145097_2_CPT 6uM, 24 hours_MCF7_CPT 6uM, 24 hours
3	3	492.116		0.0573963	1.08672	12.0765	-3.5085									en141089	GSE145097_2_CPT 6uM, 24 hours_MCF7_CPT 6uM, 24 hours
3	3	512.202		0.0728733	1.09742	9.51168	-0.296729									en141093	GSE145097_2_CPT 6uM, 24 hours_MCF7_CPT 6uM, 24 hours
3	3	40.1727		0.536003	2.88371	1.29318	-0.864698									en141257	GSE145097_2_CPT 6uM, 24 hours_MCF7_CPT 6uM, 24 hours
3	3	50.2159		0.430956	2.36687	1.60839	-24.6169									en141259	GSE145097_2_CPT 6uM, 24 hours_MCF7_CPT 6uM, 24 hours
3	3	140.605		0.160914	1.39003	4.30755	-10.6074									en141260	GSE145097_2_CPT 6uM, 24 hours_MCF7_CPT 6uM, 24 hours
3	3	70.3023		0.0714676	1.11158	9.69876	-2.37523									en141265	GSE145097_2_CPT 6uM, 24 hours_MCF7_CPT 6uM, 24 hours
3	3	50.2159		0.216176	1.44654	3.20641	2.80115									en141266	GSE145097_2_CPT 6uM, 24 hours_MCF7_CPT 6uM, 24 hours
3	3	30.1296		0.0314863	0.982405	22.0143	1.63799									en141267	GSE145097_2_CPT 6uM, 24 hours_MCF7_CPT 6uM, 24 hours
3	3	371.598		0.0698945	1.10261	9.91705	-1.66048									en141320	GSE145097_2_CPT 6uM, 24 hours_MCF7_CPT 6uM, 24 hours
3	3	482.073		0.188559	1.50854	3.67602	-1.04204									en141323	GSE145097_2_CPT 6uM, 24 hours_MCF7_CPT 6uM, 24 hours
3	3	1024.4		-0.0063423	0.972925		-8.82036									en141324	GSE145097_2_CPT 6uM, 24 hours_MCF7_CPT 6uM, 24 hours
3	3	20.0864		0.0370085	0.936059	18.7294	4.84016									en141471	GSE145097_2_CPT 6uM, 24 hours_MCF7_CPT 6uM, 24 hours
3	3	30.1296		-0.0842688	0.599935		8.21007									en141601	GSE145097_2_CPT 6uM, 24 hours_MCF7_CPT 6uM, 24 hours
3	3	90.3887		0.122857	1.29218	5.64191	-9.05091									en141617	GSE145097_2_CPT 6uM, 24 hours_MCF7_CPT 6uM, 24 hours
3	3	20.0864		-0.48116	0.145689		9.75562									en141619	GSE145097_2_CPT 6uM, 24 hours_MCF7_CPT 6uM, 24 hours
3	3	110.475		0.10138	1.2412	6.83714	-7.97826									en141804	GSE145097_2_CPT 6uM, 24 hours_MCF7_CPT 6uM, 24 hours
3	3	321.382		-0.0659998	0.819338		-0.559925									en142005	GSE145097_2_CPT 6uM, 24 hours_MCF7_CPT 6uM, 24 hours
3	3	1004.32		0.0683437	1.15425	10.1421	-12.5043									en142025	GSE145097_2_CPT 6uM, 24 hours_MCF7_CPT 6uM, 24 hours
3	3	80.3455		-0.151789	0.590562		5.29822									en142026	GSE145097_2_CPT 6uM, 24 hours_MCF7_CPT 6uM, 24 hours
3	3	170.734		0.51896	2.77309	1.33565	0.751376									en142424	GSE145097_2_CPT 6uM, 24 hours_MCF7_CPT 6uM, 24 hours
3	3	150.648		0.0103456	0.99784	66.999	-6.02214									en142425	GSE145097_2_CPT 6uM, 24 hours_MCF7_CPT 6uM, 24 hours
3	3	40.1727		0.181323	1.26284	3.82271	6.37376									en142693	GSE145097_2_CPT 6uM, 24 hours_MCF7_CPT 6uM, 24 hours
3	3	20.0864		-0.371136	0.230437		9.26236									en142782	GSE145097_2_CPT 6uM, 24 hours_MCF7_CPT 6uM, 24 hours
3	3	170.734		-0.0291829	0.900935		-2.36807									en142850	GSE145097_2_CPT 6uM, 24 hours_MCF7_CPT 6uM, 24 hours
3	3	60.2591		0.31762	1.96252	2.18232	1.85886									en142932	GSE145097_2_CPT 6uM, 24 hours_MCF7_CPT 6uM, 24 hours
3	3	160.691		0.0370085	0.936059	18.7294	4.84016									en142985	GSE145097_2_CPT 6uM, 24 hours_MCF7_CPT 6uM, 24 hours
3	3	50.2159		0.246784	1.64676	2.80872	-11.4508									en143127	GSE145097_2_CPT 6uM, 24 hours_MCF7_CPT 6uM, 24 hours
3	3	261.123		-0.021066	0.88289		1.12283									en143262	GSE145097_2_CPT 6uM, 24 hours_MCF7_CPT 6uM, 24 hours
3	3	60.2591		0.119161	1.1022	5.81689	5.96508									en143479	GSE145097_2_CPT 6uM, 24 hours_MCF7_CPT 6uM, 24 hours
3	3	20.0864		-0.119114	0.582147		7.22356									en144051	GSE145097_2_CPT 6uM, 24 hours_MCF7_CPT 6uM, 24 hours
3	3	40.1727		0.17861	1.46509	3.8808	-3.14123									en144065	GSE145097_2_CPT 6uM, 24 hours_MCF7_CPT 6uM, 24 hours
3	3	30.1296		0.136047	1.28914	5.0949	-5.74566									en14418	GSE145097_2_CPT 6uM, 24 hours_MCF7_CPT 6uM, 24 hours
3	3	130.561		0.285084	1.66428	2.43138	3.67754									en144224	GSE145097_2_CPT 6uM, 24 hours_MCF7_CPT 6uM, 24 hours
3	3	20.0864		0.0370085	0.936059	18.7294	4.84016									en14439	GSE145097_2_CPT 6uM, 24 hours_MCF7_CPT 6uM, 24 hours
3	3	30.1296		0.202326	1.36925	3.4259	4.65732									en14442	GSE145097_2_CPT 6uM, 24 hours_MCF7_CPT 6uM, 24 hours
3	3	140.605		0.0672228	1.12651	10.3112	-7.68283									en144436	GSE145097_2_CPT 6uM, 24 hours_MCF7_CPT 6uM, 24 hours
3	3	110.475		0.251057	1.6792	2.76091	-4.5786									en144437	GSE145097_2_CPT 6uM, 24 hours_MCF7_CPT 6uM, 24 hours
3	3	60.2591		-0.0604795	0.755449		4.40961									en144440	GSE145097_2_CPT 6uM, 24 hours_MCF7_CPT 6uM, 24 hours
3	3	100.432		0.153608	1.35984	4.51243	-34.1567									en144441	GSE145097_2_CPT 6uM, 24 hours_MCF7_CPT 6uM, 24 hours
3	3	90.3887		0.0814489	1.03644	8.51021	4.86982									en144442	GSE145097_2_CPT 6uM, 24 hours_MCF7_CPT 6uM, 24 hours
3	3	562.418		0.0157608	0.94509	43.9792	1.93935									en144539	GSE145097_2_CPT 6uM, 24 hours_MCF7_CPT 6uM, 24 hours
3	3	30.1296		-0.0604795	0.755449		4.40961									en144835	GSE145097_2_CPT 6uM, 24 hours_MCF7_CPT 6uM, 24 hours
3	3	40.1727		0.536003	2.88371	1.29318	-0.864698									en144886	GSE145097_2_CPT 6uM, 24 hours_MCF7_CPT 6uM, 24 hours
3	3	50.2159		0.471564	2.48475	1.46989	3.4258									en144984	GSE145097_2_CPT 6uM, 24 hours_MCF7_CPT 6uM, 24 hours
3	3	20.0864		0.0370085	0.936059	18.7294	4.84016									en145295	GSE145097_2_CPT 6uM, 24 hours_MCF7_CPT 6uM, 24 hours
3	3	20.0864		-0.371136	0.230437		9.26236									en145296	GSE145097_2_CPT 6uM, 24 hours_MCF7_CPT 6uM, 24 hours
3	3	110.475		0.0353168	0.948272	19.6266	4.12226									en145326	GSE145097_2_CPT 6uM, 24 hours_MCF7_CPT 6uM, 24 hours
3	3	30.1296		0.202326	1.36925	3.4259	4.65732									en145327	GSE145097_2_CPT 6uM, 24 hours_MCF7_CPT 6uM, 24 hours
3	3	60.2591		0.0710502	1.15584	9.75574	-17.9276									en145328	GSE145097_2_CPT 6uM, 24 hours_MCF7_CPT 6uM, 24 hours
3	3	120.518		-0.0499494	0.861084		-2.14952									en145331	GSE145097_2_CPT 6uM, 24 hours_MCF7_CPT 6uM, 24 hours
3	3	30.1296		0.202326	1.36925	3.4259	4.65732									en145334	GSE145097_2_CPT 6uM, 24 hours_MCF7_CPT 6uM, 24 hours
3	3	100.432		0.141619	1.15687	4.89443	6.14132									en145338	GSE145097_2_CPT 6uM, 24 hours_MCF7_CPT 6uM, 24 hours
3	3	40.1727		0.536003	2.88371	1.29318	-0.864698									en145437	GSE145097_2_CPT 6uM, 24 hours_MCF7_CPT 6uM, 24 hours
3	3	873.757		0.0162876	0.987471	42.5568	-1.92659									en145438	GSE145097_2_CPT 6uM, 24 hours_MCF7_CPT 6uM, 24 hours
3	3	30.1296		0.202326	1.36925	3.4259	4.65732									en145856	GSE145097_2_CPT 6uM, 24 hours_MCF7_CPT 6uM, 24 hours
3	3	170.734		-0.101359	0.749328		0.473021									en145857	GSE145097_2_CPT 6uM, 24 hours_MCF7_CPT 6uM, 24 hours
3	3	1205.18		0.00446694	0.964571	155.173	-2.09342									en146378	GSE145097_2_CPT 6uM, 24 hours_MCF7_CPT 6uM, 24 hours
3	3	833.584		0.000277353	0.96298	2499.16	-3.09547									en146379	GSE145097_2_CPT 6uM, 24 hours_MCF7_CPT 6uM, 24 hours
3	3	602.591		0.0779767	1.18914	8.88916	-6.72									en146387	GSE145097_2_CPT 6uM, 24 hours_MCF7_CPT 6uM, 24 hours
3	3	20.0864		0.233193	1.5518	2.97242	-1.93266									en146392	GSE145097_2_CPT 6uM, 24 hours_MCF7_CPT 6uM, 24 hours
3	3	20.0864		0.0370085	0.936059	18.7294	4.84016									en146981	GSE145097_2_CPT 6uM, 24 hours_MCF7_CPT 6uM, 24 hours
3	3	40.1727		0.129074	1.1995	5.37017	2.60471									en147090	GSE145097_2_CPT 6uM, 24 hours_MCF7_CPT 6uM, 24 hours
3	3	50.2159		0.430956	2.36687	1.60839	-24.6169									en147092	GSE145097_2_CPT 6uM, 24 hours_MCF7_CPT 6uM, 24 hours
3	3	40.1727		0.233193	1.5518	2.97242	-1.93266									en147669	GSE145097_2_CPT 6uM, 24 hours_MCF7_CPT 6uM, 24 hours
3	3	30.1296		0.254387	1.70548	2.72478	-1.87751									en14789	GSE145097_2_CPT 6uM, 24 hours_MCF7_CPT 6uM, 24 hours
3	3	20.0864		-0.119114	0.582147		7.22356									en147929	GSE145097_2_CPT 6uM, 24 hours_MCF7_CPT 6uM, 24 hours
3	3	20.0864		0.233193	1.5518	2.97242	-1.93266									en148054	GSE145097_2_CPT 6uM, 24 hours_MCF7_CPT 6uM, 24 hours
3	3	80.3455		0.419559	2.29704	1.65208	-6.36219									en148109	GSE145097_2_CPT 6uM, 24 hours_MCF7_CPT 6uM, 24 hours
3	3	30.1296		-0.197228	0.404328		9.04185									en148112	GSE145097_2_CPT 6uM, 24 hours_MCF7_CPT 6uM, 24 hours
3	3	451.943		0.0437642	1.0239	15.8382	0.440926									en148117	GSE145097_2_CPT 6uM, 24 hours_MCF7_CPT 6uM, 24 hours
3	3	160.691		0.153938	1.27814	4.50277	1.80461									en148140	GSE145097_2_CPT 6uM, 24 hours_MCF7_CPT 6uM, 24 hours
3	3	20.0864		0.233193	1.5518	2.97242	-1.93266									en148226	GSE145097_2_CPT 6uM, 24 hours_MCF7_CPT 6uM, 24 hours
3	3	20.0864		-0.582752	0.0935249		10.0835									en148341	GSE145097_2_CPT 6uM, 24 hours_MCF7_CPT 6uM, 24 hours
3	3	30.1296		-0.287115	0.354574		7.84559									en148410	GSE145097_2_CPT 6uM, 24 hours_MCF7_CPT 6uM, 24 hours
3	3	140.605		0.141837	1.38574	4.88693	-0.356501									en148418	GSE145097_2_CPT 6uM, 24 hours_MCF7_CPT 6uM, 24 hours
3	3	50.2159		0.140286	1.35727	4.94095	-3.64818									en148419	GSE145097_2_CPT 6uM, 24 hours_MCF7_CPT 6uM, 24 hours
3	3	100.432		-0.174276	0.483326		7.81577									en148427	GSE145097_2_CPT 6uM, 24 hours_MCF7_CPT 6uM, 24 hours
3	3	180.777		0.243675	1.4679	2.84455	6.07543									en148841	GSE145097_2_CPT 6uM, 24 hours_MCF7_CPT 6uM, 24 hours
3	3	30.1296		-0.301346	0.27073		9.60616									en148842	GSE145097_2_CPT 6uM, 24 hours_MCF7_CPT 6uM, 24 hours
3	3	120.518		-0.0148276	0.891883		1.35718									en148843	GSE145097_2_CPT 6uM, 24 hours_MCF7_CPT 6uM, 24 hours
3	3	110.475		0.414028	2.26397	1.67415	-4.20794									en148934	GSE145097_2_CPT 6uM, 24 hours_MCF7_CPT 6uM, 24 hours
3	3	150.648		0.0483806	1.05319	14.327	-1.55656									en148935	GSE145097_2_CPT 6uM, 24 hours_MCF7_CPT 6uM, 24 hours
3	3	291.252		0.0018549	0.876759	373.684	4.20961									en148936	GSE145097_2_CPT 6uM, 24 hours_MCF7_CPT 6uM, 24 hours
3	3	20.0864		-0.96424	0.016554		10.7371									en148937	GSE145097_2_CPT 6uM, 24 hours_MCF7_CPT 6uM, 24 hours
3	3	100.432		-0.0265517	0.812143		4.63421									en148943	GSE145097_2_CPT 6uM, 24 hours_MCF7_CPT 6uM, 24 hours
3	3	271.166		0.00889463	0.975577	77.9287	-2.37403									en149132	GSE145097_2_CPT 6uM, 24 hours_MCF7_CPT 6uM, 24 hours
3	3	40.1727		0.0370085	0.936059	18.7294	4.84016									en149228	GSE145097_2_CPT 6uM, 24 hours_MCF7_CPT 6uM, 24 hours
3	3	40.1727		0.0293012	1.00688	23.6559	-0.971915									en149259	GSE145097_2_CPT 6uM, 24 hours_MCF7_CPT 6uM, 24 hours
3	3	30.1296		0.0314863	0.982405	22.0143	1.63799									en149288	GSE145097_2_CPT 6uM, 24 hours_MCF7_CPT 6uM, 24 hours
3	3	20.0864		0.233193	1.5518	2.97242	-1.93266									en149327	GSE145097_2_CPT 6uM, 24 hours_MCF7_CPT 6uM, 24 hours
3	3	1285.53		0.0167344	0.970424	41.4205	0.0654742									en149420	GSE145097_2_CPT 6uM, 24 hours_MCF7_CPT 6uM, 24 hours
3	3	180.777		0.0648155	1.07438	10.6942	0.135822									en149421	GSE145097_2_CPT 6uM, 24 hours_MCF7_CPT 6uM, 24 hours
3	3	90.3887		-0.0888271	0.693227		5.0287									en149423	GSE145097_2_CPT 6uM, 24 hours_MCF7_CPT 6uM, 24 hours
3	3	50.2159		-0.134242	0.582066		6.53018									en149677	GSE145097_2_CPT 6uM, 24 hours_MCF7_CPT 6uM, 24 hours
3	3	30.1296		0.202326	1.36925	3.4259	4.65732									en149681	GSE145097_2_CPT 6uM, 24 hours_MCF7_CPT 6uM, 24 hours
3	3	50.2159		-0.0698284	0.77673		2.37635									en149914	GSE145097_2_CPT 6uM, 24 hours_MCF7_CPT 6uM, 24 hours
3	3	301.296		-0.0564587	0.850749		-2.33441									en150389	GSE145097_2_CPT 6uM, 24 hours_MCF7_CPT 6uM, 24 hours
3	3	30.1296		0.254387	1.70548	2.72478	-1.87751									en150459	GSE145097_2_CPT 6uM, 24 hours_MCF7_CPT 6uM, 24 hours
3	3	20.0864		-0.582752	0.0935249		10.0835									en150460	GSE145097_2_CPT 6uM, 24 hours_MCF7_CPT 6uM, 24 hours
3	3	532.289		0.0743393	1.14986	9.32411	-10.7377									en150461	GSE145097_2_CPT 6uM, 24 hours_MCF7_CPT 6uM, 24 hours
3	3	110.475		0.10138	1.2412	6.83714	-7.97826									en150463	GSE145097_2_CPT 6uM, 24 hours_MCF7_CPT 6uM, 24 hours
3	3	692.98		0.0687021	1.15172	10.0892	-15.894									en150464	GSE145097_2_CPT 6uM, 24 hours_MCF7_CPT 6uM, 24 hours
3	3	30.1296		0.0314863	0.982405	22.0143	1.63799									en150465	GSE145097_2_CPT 6uM, 24 hours_MCF7_CPT 6uM, 24 hours
3	3	120.518		-0.0171366	0.829045		4.68018									en150466	GSE145097_2_CPT 6uM, 24 hours_MCF7_CPT 6uM, 24 hours
3	3	241.036		0.0283191	1.01937	24.4763	-2.88079									en150467	GSE145097_2_CPT 6uM, 24 hours_MCF7_CPT 6uM, 24 hours
3	3	50.2159		0.0822935	1.1763	8.42287	-19.0535									en150517	GSE145097_2_CPT 6uM, 24 hours_MCF7_CPT 6uM, 24 hours
3	3	110.475		-0.0601009	0.658921		7.74685									en150518	GSE145097_2_CPT 6uM, 24 hours_MCF7_CPT 6uM, 24 hours
3	3	261.123		0.115907	1.31301	5.98021	-1.02428									en150535	GSE145097_2_CPT 6uM, 24 hours_MCF7_CPT 6uM, 24 hours
3	3	70.3023		0.0714676	1.11158	9.69876	-2.37523									en150538	GSE145097_2_CPT 6uM, 24 hours_MCF7_CPT 6uM, 24 hours
3	3	30.1296		0.0314863	0.982405	22.0143	1.63799									en150584	GSE145097_2_CPT 6uM, 24 hours_MCF7_CPT 6uM, 24 hours
3	3	20.0864		-0.251814	0.366054		8.49363									en15072	GSE145097_2_CPT 6uM, 24 hours_MCF7_CPT 6uM, 24 hours
3	3	100.432		0.102153	1.27587	6.78535	-1.39488									en150721	GSE145097_2_CPT 6uM, 24 hours_MCF7_CPT 6uM, 24 hours
3	3	20.0864		0.233193	1.5518	2.97242	-1.93266									en150900	GSE145097_2_CPT 6uM, 24 hours_MCF7_CPT 6uM, 24 hours
3	3	160.691		-0.00403591	0.919182		0.871154									en150959	GSE145097_2_CPT 6uM, 24 hours_MCF7_CPT 6uM, 24 hours
3	3	200.864		0.142913	1.40686	4.85013	1.29434									en150963	GSE145097_2_CPT 6uM, 24 hours_MCF7_CPT 6uM, 24 hours
3	3	622.678		0.00685452	0.995758	101.123	-7.4957									en150964	GSE145097_2_CPT 6uM, 24 hours_MCF7_CPT 6uM, 24 hours
3	3	401.727		-0.0478704	0.868873		-2.72794									en150967	GSE145097_2_CPT 6uM, 24 hours_MCF7_CPT 6uM, 24 hours
3	3	100.432		0.0506221	1.12167	13.6926	-8.53654									en150968	GSE145097_2_CPT 6uM, 24 hours_MCF7_CPT 6uM, 24 hours
3	3	60.2591		-0.0158986	0.86062		3.24589									en150970	GSE145097_2_CPT 6uM, 24 hours_MCF7_CPT 6uM, 24 hours
3	3	200.864		0.0334839	0.963385	20.7009	3.12913									en150971	GSE145097_2_CPT 6uM, 24 hours_MCF7_CPT 6uM, 24 hours
3	3	30.1296		0.254387	1.70548	2.72478	-1.87751									en150974	GSE145097_2_CPT 6uM, 24 hours_MCF7_CPT 6uM, 24 hours
3	3	40.1727		0.17861	1.46509	3.8808	-3.14123									en151114	GSE145097_2_CPT 6uM, 24 hours_MCF7_CPT 6uM, 24 hours
3	3	100.432		0.156891	1.45369	4.41803	2.00611									en151246	GSE145097_2_CPT 6uM, 24 hours_MCF7_CPT 6uM, 24 hours
3	3	70.3023		0.10176	1.25774	6.81158	-3.97005									en151250	GSE145097_2_CPT 6uM, 24 hours_MCF7_CPT 6uM, 24 hours
3	3	100.432		0.266658	1.63373	2.59939	1.27729									en151253	GSE145097_2_CPT 6uM, 24 hours_MCF7_CPT 6uM, 24 hours
3	3	70.3023		0.0957323	1.07115	7.24047	4.86441									en151254	GSE145097_2_CPT 6uM, 24 hours_MCF7_CPT 6uM, 24 hours
3	3	80.3455		0.0502463	0.878056	13.795	7.73388									en151412	GSE145097_2_CPT 6uM, 24 hours_MCF7_CPT 6uM, 24 hours
3	3	100.432		0.123586	1.1423	5.60864	4.8364									en151554	GSE145097_2_CPT 6uM, 24 hours_MCF7_CPT 6uM, 24 hours
3	3	40.1727		0.0293012	1.00688	23.6559	-0.971915									en151957	GSE145097_2_CPT 6uM, 24 hours_MCF7_CPT 6uM, 24 hours
3	3	80.3455		0.0370085	0.936059	18.7294	4.84016									en151958	GSE145097_2_CPT 6uM, 24 hours_MCF7_CPT 6uM, 24 hours
3	3	160.691		-0.0665758	0.768275		3.22216									en151976	GSE145097_2_CPT 6uM, 24 hours_MCF7_CPT 6uM, 24 hours
3	3	30.1296		0.0314863	0.982405	22.0143	1.63799									en151977	GSE145097_2_CPT 6uM, 24 hours_MCF7_CPT 6uM, 24 hours
3	3	50.2159		0.471564	2.48475	1.46989	3.4258									en152229	GSE145097_2_CPT 6uM, 24 hours_MCF7_CPT 6uM, 24 hours
3	3	20.0864		-0.48116	0.145689		9.75562									en15225	GSE145097_2_CPT 6uM, 24 hours_MCF7_CPT 6uM, 24 hours
3	3	20.0864		-0.119114	0.582147		7.22356									en152265	GSE145097_2_CPT 6uM, 24 hours_MCF7_CPT 6uM, 24 hours
3	3	30.1296		0.398109	2.17151	1.7411	-0.673856									en152338	GSE145097_2_CPT 6uM, 24 hours_MCF7_CPT 6uM, 24 hours
3	3	90.3887		-0.142413	0.523296		7.90709									en152342	GSE145097_2_CPT 6uM, 24 hours_MCF7_CPT 6uM, 24 hours
3	3	60.2591		-0.053025	0.826558		0.897112									en152343	GSE145097_2_CPT 6uM, 24 hours_MCF7_CPT 6uM, 24 hours
3	3	30.1296		0.202326	1.36925	3.4259	4.65732									en152838	GSE145097_2_CPT 6uM, 24 hours_MCF7_CPT 6uM, 24 hours
3	3	50.2159		0.123586	1.1423	5.60864	4.8364									en153017	GSE145097_2_CPT 6uM, 24 hours_MCF7_CPT 6uM, 24 hours
3	3	80.3455		-0.138735	0.650861		3.32839									en153054	GSE145097_2_CPT 6uM, 24 hours_MCF7_CPT 6uM, 24 hours
3	3	110.475		-0.0700999	0.724343		5.03964									en153057	GSE145097_2_CPT 6uM, 24 hours_MCF7_CPT 6uM, 24 hours
3	3	150.648		-0.0224481	0.889915		0.30494									en153058	GSE145097_2_CPT 6uM, 24 hours_MCF7_CPT 6uM, 24 hours
3	3	170.734		0.226304	1.43653	3.0629	5.02641									en153216	GSE145097_2_CPT 6uM, 24 hours_MCF7_CPT 6uM, 24 hours
3	3	30.1296		0.0448882	0.895156	15.4416	6.91569									en153217	GSE145097_2_CPT 6uM, 24 hours_MCF7_CPT 6uM, 24 hours
3	3	20.0864		-0.251814	0.366054		8.49363									en15341	GSE145097_2_CPT 6uM, 24 hours_MCF7_CPT 6uM, 24 hours
3	3	80.3455		-0.0326963	0.889701		-1.74425									en15343	GSE145097_2_CPT 6uM, 24 hours_MCF7_CPT 6uM, 24 hours
3	3	40.1727		0.129074	1.1995	5.37017	2.60471									en15350	GSE145097_2_CPT 6uM, 24 hours_MCF7_CPT 6uM, 24 hours
3	3	100.432		0.251567	1.53164	2.75532	4.48847									en15351	GSE145097_2_CPT 6uM, 24 hours_MCF7_CPT 6uM, 24 hours
3	3	100.432		-0.0432218	0.872032		-1.97792									en15352	GSE145097_2_CPT 6uM, 24 hours_MCF7_CPT 6uM, 24 hours
3	3	50.2159		0.319704	1.84838	2.16809	-0.941681									en153566	GSE145097_2_CPT 6uM, 24 hours_MCF7_CPT 6uM, 24 hours
3	3	30.1296		0.0448882	0.895156	15.4416	6.91569									en15357	GSE145097_2_CPT 6uM, 24 hours_MCF7_CPT 6uM, 24 hours
3	3	20.0864		0.233193	1.5518	2.97242	-1.93266									en15359	GSE145097_2_CPT 6uM, 24 hours_MCF7_CPT 6uM, 24 hours
3	3	341.468		0.0785655	1.19694	8.82253	-5.07505									en153606	GSE145097_2_CPT 6uM, 24 hours_MCF7_CPT 6uM, 24 hours
3	3	271.166		0.0362987	0.940986	19.0957	4.55798									en153634	GSE145097_2_CPT 6uM, 24 hours_MCF7_CPT 6uM, 24 hours
3	3	80.3455		-0.0399379	0.788983		4.55742									en153635	GSE145097_2_CPT 6uM, 24 hours_MCF7_CPT 6uM, 24 hours
3	3	2450.54		0.0147611	1.00461	46.9578	-5.45532									en153647	GSE145097_2_CPT 6uM, 24 hours_MCF7_CPT 6uM, 24 hours
3	3	130.561		-0.0976428	0.728871		2.46521									en153653	GSE145097_2_CPT 6uM, 24 hours_MCF7_CPT 6uM, 24 hours
3	3	30.1296		-0.142681	0.584803		6.01508									en153654	GSE145097_2_CPT 6uM, 24 hours_MCF7_CPT 6uM, 24 hours
3	3	100.432		0.00241574	0.953337	286.929	-1.20325									en15368	GSE145097_2_CPT 6uM, 24 hours_MCF7_CPT 6uM, 24 hours
3	3	50.2159		-0.196742	0.521969		5.62812									en15369	GSE145097_2_CPT 6uM, 24 hours_MCF7_CPT 6uM, 24 hours
3	3	40.1727		-0.0359557	0.839962		2.19895									en153718	GSE145097_2_CPT 6uM, 24 hours_MCF7_CPT 6uM, 24 hours
3	3	30.1296		-0.0842688	0.599935		8.21007									en154124	GSE145097_2_CPT 6uM, 24 hours_MCF7_CPT 6uM, 24 hours
3	3	80.3455		0.782224	4.74198	0.886123	1.4807									en154161	GSE145097_2_CPT 6uM, 24 hours_MCF7_CPT 6uM, 24 hours
3	3	70.3023		0.0344201	0.955415	20.1379	3.66978									en15431	GSE145097_2_CPT 6uM, 24 hours_MCF7_CPT 6uM, 24 hours
3	3	50.2159		0.166268	1.19292	4.16886	7.20465									en154333	GSE145097_2_CPT 6uM, 24 hours_MCF7_CPT 6uM, 24 hours
3	3	70.3023		0.243193	1.62053	2.85019	-13.7372									en154452	GSE145097_2_CPT 6uM, 24 hours_MCF7_CPT 6uM, 24 hours
3	3	40.1727		0.0370085	0.936059	18.7294	4.84016									en154456	GSE145097_2_CPT 6uM, 24 hours_MCF7_CPT 6uM, 24 hours
3	3	30.1296		0.0314863	0.982405	22.0143	1.63799									en154540	GSE145097_2_CPT 6uM, 24 hours_MCF7_CPT 6uM, 24 hours
3	3	391.684		0.171568	1.47055	4.04008	0.0657672									en154742	GSE145097_2_CPT 6uM, 24 hours_MCF7_CPT 6uM, 24 hours
3	3	1466.31		0.16832	1.44566	4.11804	-1.72998									en154745	GSE145097_2_CPT 6uM, 24 hours_MCF7_CPT 6uM, 24 hours
3	3	80.3455		0.0641684	1.10414	10.802	-3.87818									en154918	GSE145097_2_CPT 6uM, 24 hours_MCF7_CPT 6uM, 24 hours
3	3	50.2159		0.0281305	1.02189	24.6404	-3.34803									en154920	GSE145097_2_CPT 6uM, 24 hours_MCF7_CPT 6uM, 24 hours
3	3	60.2591		0.202326	1.36925	3.4259	4.65732									en155074	GSE145097_2_CPT 6uM, 24 hours_MCF7_CPT 6uM, 24 hours
3	3	50.2159		0.0281305	1.02189	24.6404	-3.34803									en155082	GSE145097_2_CPT 6uM, 24 hours_MCF7_CPT 6uM, 24 hours
3	3	60.2591		0.417901	2.18861	1.65864	5.15445									en155354	GSE145097_2_CPT 6uM, 24 hours_MCF7_CPT 6uM, 24 hours
3	3	20.0864		0.0370085	0.936059	18.7294	4.84016									en15551	GSE145097_2_CPT 6uM, 24 hours_MCF7_CPT 6uM, 24 hours
3	3	50.2159		0.328398	1.97812	2.11069	-0.580319									en15553	GSE145097_2_CPT 6uM, 24 hours_MCF7_CPT 6uM, 24 hours
3	3	30.1296		-0.142681	0.584803		6.01508									en155626	GSE145097_2_CPT 6uM, 24 hours_MCF7_CPT 6uM, 24 hours
3	3	40.1727		-0.427205	0.183025		9.53498									en155718	GSE145097_2_CPT 6uM, 24 hours_MCF7_CPT 6uM, 24 hours
3	3	40.1727		0.0293012	1.00688	23.6559	-0.971915									en15586	GSE145097_2_CPT 6uM, 24 hours_MCF7_CPT 6uM, 24 hours
3	3	120.518		0.451394	2.44108	1.53557	-3.84127									en15588	GSE145097_2_CPT 6uM, 24 hours_MCF7_CPT 6uM, 24 hours
3	3	160.691		-0.00425242	0.896849		2.44983									en15592	GSE145097_2_CPT 6uM, 24 hours_MCF7_CPT 6uM, 24 hours
3	3	30.1296		0.254387	1.70548	2.72478	-1.87751									en15593	GSE145097_2_CPT 6uM, 24 hours_MCF7_CPT 6uM, 24 hours
3	3	180.777		0.136518	1.40388	5.07735	2.2903									en15609	GSE145097_2_CPT 6uM, 24 hours_MCF7_CPT 6uM, 24 hours
3	3	30.1296		0.202326	1.36925	3.4259	4.65732									en15611	GSE145097_2_CPT 6uM, 24 hours_MCF7_CPT 6uM, 24 hours
3	3	70.3023		0.0301996	0.996307	22.9522	0.287494									en156441	GSE145097_2_CPT 6uM, 24 hours_MCF7_CPT 6uM, 24 hours
3	3	180.777		-0.000363019	0.977249		-6.30053									en156451	GSE145097_2_CPT 6uM, 24 hours_MCF7_CPT 6uM, 24 hours
3	3	20.0864		-0.48116	0.145689		9.75562									en156452	GSE145097_2_CPT 6uM, 24 hours_MCF7_CPT 6uM, 24 hours
3	3	30.1296		0.254387	1.70548	2.72478	-1.87751									en156458	GSE145097_2_CPT 6uM, 24 hours_MCF7_CPT 6uM, 24 hours
3	3	210.907		0.142634	1.29078	4.85962	-2.65723									en156459	GSE145097_2_CPT 6uM, 24 hours_MCF7_CPT 6uM, 24 hours
3	3	20.0864		0.233193	1.5518	2.97242	-1.93266									en156530	GSE145097_2_CPT 6uM, 24 hours_MCF7_CPT 6uM, 24 hours
3	3	20.0864		0.233193	1.5518	2.97242	-1.93266									en156534	GSE145097_2_CPT 6uM, 24 hours_MCF7_CPT 6uM, 24 hours
3	3	90.3887		0.122857	1.29218	5.64191	-9.05091									en15655	GSE145097_2_CPT 6uM, 24 hours_MCF7_CPT 6uM, 24 hours
3	3	30.1296		0.202326	1.36925	3.4259	4.65732									en15656	GSE145097_2_CPT 6uM, 24 hours_MCF7_CPT 6uM, 24 hours
3	3	70.3023		0.364471	2.12592	1.90179	0.0273989									en156881	GSE145097_2_CPT 6uM, 24 hours_MCF7_CPT 6uM, 24 hours
3	3	271.166		-0.0640688	0.782858		2.61976									en156928	GSE145097_2_CPT 6uM, 24 hours_MCF7_CPT 6uM, 24 hours
3	3	180.777		-0.120897	0.691644		2.49593									en156930	GSE145097_2_CPT 6uM, 24 hours_MCF7_CPT 6uM, 24 hours
3	3	60.2591		-0.0902161	0.741293		2.4468									en156933	GSE145097_2_CPT 6uM, 24 hours_MCF7_CPT 6uM, 24 hours
3	3	100.432		-0.253648	0.429865		6.55421									en156935	GSE145097_2_CPT 6uM, 24 hours_MCF7_CPT 6uM, 24 hours
3	3	170.734		0.148113	1.19886	4.67986	5.22018									en157187	GSE145097_2_CPT 6uM, 24 hours_MCF7_CPT 6uM, 24 hours
3	3	50.2159		0.303528	1.68932	2.28364	5.77014									en157312	GSE145097_2_CPT 6uM, 24 hours_MCF7_CPT 6uM, 24 hours
3	3	60.2591		-0.0842688	0.599935		8.21007									en157388	GSE145097_2_CPT 6uM, 24 hours_MCF7_CPT 6uM, 24 hours
3	3	50.2159		0.246784	1.64676	2.80872	-11.4508									en157390	GSE145097_2_CPT 6uM, 24 hours_MCF7_CPT 6uM, 24 hours
3	3	30.1296		0.0448882	0.895156	15.4416	6.91569									en15815	GSE145097_2_CPT 6uM, 24 hours_MCF7_CPT 6uM, 24 hours
3	3	20.0864		0.0370085	0.936059	18.7294	4.84016									en158695	GSE145097_2_CPT 6uM, 24 hours_MCF7_CPT 6uM, 24 hours
3	3	120.518		-0.0202935	0.764634		6.80607									en158852	GSE145097_2_CPT 6uM, 24 hours_MCF7_CPT 6uM, 24 hours
3	3	220.95		0.0687547	1.1087	10.0814	-2.87825									en159122	GSE145097_2_CPT 6uM, 24 hours_MCF7_CPT 6uM, 24 hours
3	3	120.518		0.417901	2.18861	1.65864	5.15445									en159126	GSE145097_2_CPT 6uM, 24 hours_MCF7_CPT 6uM, 24 hours
3	3	120.518		0.193593	1.48177	3.58044	-11.4108									en159127	GSE145097_2_CPT 6uM, 24 hours_MCF7_CPT 6uM, 24 hours
3	3	140.605		0.129117	1.31533	5.36838	-6.5424									en159131	GSE145097_2_CPT 6uM, 24 hours_MCF7_CPT 6uM, 24 hours
3	3	170.734		0.202007	1.60418	3.4313	3.47336									en159132	GSE145097_2_CPT 6uM, 24 hours_MCF7_CPT 6uM, 24 hours
3	3	120.518		0.0971113	1.10319	7.13766	3.48887									en159139	GSE145097_2_CPT 6uM, 24 hours_MCF7_CPT 6uM, 24 hours
3	3	743.196		0.0688432	1.15623	10.0685	-11.8924									en159145	GSE145097_2_CPT 6uM, 24 hours_MCF7_CPT 6uM, 24 hours
3	3	170.734		0.0559081	0.997733	12.398	3.92512									en159146	GSE145097_2_CPT 6uM, 24 hours_MCF7_CPT 6uM, 24 hours
3	3	20.0864		0.233193	1.5518	2.97242	-1.93266									en159312	GSE145097_2_CPT 6uM, 24 hours_MCF7_CPT 6uM, 24 hours
3	3	40.1727		0.233193	1.5518	2.97242	-1.93266									en159406	GSE145097_2_CPT 6uM, 24 hours_MCF7_CPT 6uM, 24 hours
3	3	30.1296		0.0448882	0.895156	15.4416	6.91569									en159443	GSE145097_2_CPT 6uM, 24 hours_MCF7_CPT 6uM, 24 hours
3	3	80.3455		0.124777	1.33749	5.55508	-0.791325									en159448	GSE145097_2_CPT 6uM, 24 hours_MCF7_CPT 6uM, 24 hours
3	3	20.0864		0.233193	1.5518	2.97242	-1.93266									en159588	GSE145097_2_CPT 6uM, 24 hours_MCF7_CPT 6uM, 24 hours
3	3	110.475		0.0603149	1.05021	11.4921	1.3153									en15961	GSE145097_2_CPT 6uM, 24 hours_MCF7_CPT 6uM, 24 hours
3	3	60.2591		0.0710502	1.15584	9.75574	-17.9276									en15973	GSE145097_2_CPT 6uM, 24 hours_MCF7_CPT 6uM, 24 hours
3	3	80.3455		-0.0875742	0.759962		1.45263									en159758	GSE145097_2_CPT 6uM, 24 hours_MCF7_CPT 6uM, 24 hours
3	3	40.1727		0.0370085	0.936059	18.7294	4.84016									en15976	GSE145097_2_CPT 6uM, 24 hours_MCF7_CPT 6uM, 24 hours
3	3	30.1296		0.398109	2.17151	1.7411	-0.673856									en159852	GSE145097_2_CPT 6uM, 24 hours_MCF7_CPT 6uM, 24 hours
3	3	20.0864		0.233193	1.5518	2.97242	-1.93266									en160054	GSE145097_2_CPT 6uM, 24 hours_MCF7_CPT 6uM, 24 hours
3	3	50.2159		0.266941	1.81427	2.59663	3.84848									en160148	GSE145097_2_CPT 6uM, 24 hours_MCF7_CPT 6uM, 24 hours
3	3	20.0864		0.233193	1.5518	2.97242	-1.93266									en160205	GSE145097_2_CPT 6uM, 24 hours_MCF7_CPT 6uM, 24 hours
3	3	70.3023		0.0714676	1.11158	9.69876	-2.37523									en160299	GSE145097_2_CPT 6uM, 24 hours_MCF7_CPT 6uM, 24 hours
3	3	30.1296		-0.0604795	0.755449		4.40961									en160308	GSE145097_2_CPT 6uM, 24 hours_MCF7_CPT 6uM, 24 hours
3	3	50.2159		-0.0698284	0.77673		2.37635									en160353	GSE145097_2_CPT 6uM, 24 hours_MCF7_CPT 6uM, 24 hours
3	3	120.518		0.125904	1.29065	5.50537	-15.9787									en160520	GSE145097_2_CPT 6uM, 24 hours_MCF7_CPT 6uM, 24 hours
3	3	70.3023		0.369258	2.01321	1.87713	2.49267									en160651	GSE145097_2_CPT 6uM, 24 hours_MCF7_CPT 6uM, 24 hours
3	3	30.1296		-0.0604795	0.755449		4.40961									en160701	GSE145097_2_CPT 6uM, 24 hours_MCF7_CPT 6uM, 24 hours
3	3	170.734		0.176573	1.34025	3.92555	1.92965									en161150	GSE145097_2_CPT 6uM, 24 hours_MCF7_CPT 6uM, 24 hours
3	3	20.0864		0.0370085	0.936059	18.7294	4.84016									en161530	GSE145097_2_CPT 6uM, 24 hours_MCF7_CPT 6uM, 24 hours
3	3	5965.65		0.0557727	1.12666	12.4281	-11.8787									en161556	GSE145097_2_CPT 6uM, 24 hours_MCF7_CPT 6uM, 24 hours
3	3	220.95		0.134939	1.27327	5.13676	-3.11791									en161559	GSE145097_2_CPT 6uM, 24 hours_MCF7_CPT 6uM, 24 hours
3	3	180.777		0.152512	1.29651	4.54486	-0.086902									en161769	GSE145097_2_CPT 6uM, 24 hours_MCF7_CPT 6uM, 24 hours
3	3	522.246		0.00326995	0.971812	211.975	-3.56453									en161824	GSE145097_2_CPT 6uM, 24 hours_MCF7_CPT 6uM, 24 hours
3	3	170.734		-0.139893	0.551621		7.2213									en161828	GSE145097_2_CPT 6uM, 24 hours_MCF7_CPT 6uM, 24 hours
3	3	180.777		-0.0978979	0.640494		6.43682									en161829	GSE145097_2_CPT 6uM, 24 hours_MCF7_CPT 6uM, 24 hours
3	3	50.2159		-0.317572	0.303959		8.47051									en161837	GSE145097_2_CPT 6uM, 24 hours_MCF7_CPT 6uM, 24 hours
3	3	150.648		-0.0735119	0.747373		3.70613									en161927	GSE145097_2_CPT 6uM, 24 hours_MCF7_CPT 6uM, 24 hours
3	3	200.864		0.0151634	0.986941	45.7118	-2.16696									en16197	GSE145097_2_CPT 6uM, 24 hours_MCF7_CPT 6uM, 24 hours
3	3	3997.19		-0.00503142	0.957314		-3.93401									en16199	GSE145097_2_CPT 6uM, 24 hours_MCF7_CPT 6uM, 24 hours
3	3	100.432		-0.146082	0.643049		3.16018									en16200	GSE145097_2_CPT 6uM, 24 hours_MCF7_CPT 6uM, 24 hours
3	3	271.166		-0.0769825	0.776729		1.52888									en16202	GSE145097_2_CPT 6uM, 24 hours_MCF7_CPT 6uM, 24 hours
3	3	40.1727		0.0370085	0.936059	18.7294	4.84016									en162380	GSE145097_2_CPT 6uM, 24 hours_MCF7_CPT 6uM, 24 hours
3	3	120.518		0.586925	3.17051	1.18098	2.75049									en162382	GSE145097_2_CPT 6uM, 24 hours_MCF7_CPT 6uM, 24 hours
3	3	2068.9		0.00858965	1.00772	80.6956	-11.2776									en162384	GSE145097_2_CPT 6uM, 24 hours_MCF7_CPT 6uM, 24 hours
3	3	20.0864		-0.119114	0.582147		7.22356									en162389	GSE145097_2_CPT 6uM, 24 hours_MCF7_CPT 6uM, 24 hours
3	3	1375.92		0.0600351	1.09024	11.5457	-3.1054									en162400	GSE145097_2_CPT 6uM, 24 hours_MCF7_CPT 6uM, 24 hours
3	3	1416.09		0.0668565	1.12603	10.3677	-7.80637									en162401	GSE145097_2_CPT 6uM, 24 hours_MCF7_CPT 6uM, 24 hours
3	3	1687.26		0.208544	1.43452	3.32375	2.00846									en162404	GSE145097_2_CPT 6uM, 24 hours_MCF7_CPT 6uM, 24 hours
3	3	230.993		0.078065	1.07338	8.87911	2.55612									en162405	GSE145097_2_CPT 6uM, 24 hours_MCF7_CPT 6uM, 24 hours
3	3	30.1296		0.202326	1.36925	3.4259	4.65732									en162585	GSE145097_2_CPT 6uM, 24 hours_MCF7_CPT 6uM, 24 hours
3	3	60.2591		0.202326	1.36925	3.4259	4.65732									en162590	GSE145097_2_CPT 6uM, 24 hours_MCF7_CPT 6uM, 24 hours
3	3	30.1296		0.0448882	0.895156	15.4416	6.91569									en162594	GSE145097_2_CPT 6uM, 24 hours_MCF7_CPT 6uM, 24 hours
3	3	40.1727		0.129074	1.1995	5.37017	2.60471									en162761	GSE145097_2_CPT 6uM, 24 hours_MCF7_CPT 6uM, 24 hours
3	3	70.3023		-0.14951	0.506397		8.08654									en162862	GSE145097_2_CPT 6uM, 24 hours_MCF7_CPT 6uM, 24 hours
3	3	241.036		0.0897965	1.04941	7.71909	5.16672									en163365	GSE145097_2_CPT 6uM, 24 hours_MCF7_CPT 6uM, 24 hours
3	3	130.561		0.0999732	1.18732	6.93333	-3.61166									en163382	GSE145097_2_CPT 6uM, 24 hours_MCF7_CPT 6uM, 24 hours
3	3	813.498		0.149691	1.35358	4.63051	-15.5769									en163383	GSE145097_2_CPT 6uM, 24 hours_MCF7_CPT 6uM, 24 hours
3	3	944.059		0.0646339	1.10749	10.7242	-4.31308									en163384	GSE145097_2_CPT 6uM, 24 hours_MCF7_CPT 6uM, 24 hours
3	3	20.0864		0.233193	1.5518	2.97242	-1.93266									en163428	GSE145097_2_CPT 6uM, 24 hours_MCF7_CPT 6uM, 24 hours
3	3	40.1727		-0.204052	0.497056		6.21792									en163504	GSE145097_2_CPT 6uM, 24 hours_MCF7_CPT 6uM, 24 hours
3	3	20.0864		0.233193	1.5518	2.97242	-1.93266									en163509	GSE145097_2_CPT 6uM, 24 hours_MCF7_CPT 6uM, 24 hours
3	3	70.3023		0.0634568	1.14268	10.9231	-12.8446									en163530	GSE145097_2_CPT 6uM, 24 hours_MCF7_CPT 6uM, 24 hours
3	3	20.0864		-0.119114	0.582147		7.22356									en164047	GSE145097_2_CPT 6uM, 24 hours_MCF7_CPT 6uM, 24 hours
3	3	411.771		0.0917072	1.14932	7.55826	-1.07985									en164635	GSE145097_2_CPT 6uM, 24 hours_MCF7_CPT 6uM, 24 hours
3	3	70.3023		0.226937	1.68511	3.05435	3.79945									en164636	GSE145097_2_CPT 6uM, 24 hours_MCF7_CPT 6uM, 24 hours
3	3	160.691		-0.022424	0.8305		4.15112									en16501	GSE145097_2_CPT 6uM, 24 hours_MCF7_CPT 6uM, 24 hours
3	3	341.468		0.182652	1.37315	3.79492	0.712941									en165148	GSE145097_2_CPT 6uM, 24 hours_MCF7_CPT 6uM, 24 hours
3	3	90.3887		0.145807	1.18356	4.75387	5.57815									en165287	GSE145097_2_CPT 6uM, 24 hours_MCF7_CPT 6uM, 24 hours
3	3	90.3887		0.687852	3.94865	1.0077	-7.96122									en165349	GSE145097_2_CPT 6uM, 24 hours_MCF7_CPT 6uM, 24 hours
3	3	80.3455		-0.0606393	0.821984		0.110736									en165381	GSE145097_2_CPT 6uM, 24 hours_MCF7_CPT 6uM, 24 hours
3	3	50.2159		0.319704	1.84838	2.16809	-0.941681									en165383	GSE145097_2_CPT 6uM, 24 hours_MCF7_CPT 6uM, 24 hours
3	3	70.3023		0.469904	2.51755	1.47508	-0.699105									en165497	GSE145097_2_CPT 6uM, 24 hours_MCF7_CPT 6uM, 24 hours
3	3	230.993		0.258694	1.59925	2.67941	1.85127									en165504	GSE145097_2_CPT 6uM, 24 hours_MCF7_CPT 6uM, 24 hours
3	3	40.1727		0.344158	1.884	2.01404	4.08951									en167038	GSE145097_2_CPT 6uM, 24 hours_MCF7_CPT 6uM, 24 hours
3	3	110.475		0.25673	1.57943	2.69991	2.77943									en167695	GSE145097_2_CPT 6uM, 24 hours_MCF7_CPT 6uM, 24 hours
3	3	803.455		0.0340152	1.04715	20.3775	-5.9668									en167761	GSE145097_2_CPT 6uM, 24 hours_MCF7_CPT 6uM, 24 hours
3	3	40.1727		0.100654	1.21211	6.88641	-10.4425									en167763	GSE145097_2_CPT 6uM, 24 hours_MCF7_CPT 6uM, 24 hours
3	3	1817.82		-0.0415414	0.89095		-4.56907									en167765	GSE145097_2_CPT 6uM, 24 hours_MCF7_CPT 6uM, 24 hours
3	3	20.0864		0.0370085	0.936059	18.7294	4.84016									en167768	GSE145097_2_CPT 6uM, 24 hours_MCF7_CPT 6uM, 24 hours
3	3	80.3455		0.258262	1.53454	2.68389	5.39947									en167844	GSE145097_2_CPT 6uM, 24 hours_MCF7_CPT 6uM, 24 hours
3	3	50.2159		0.471564	2.48475	1.46989	3.4258									en167948	GSE145097_2_CPT 6uM, 24 hours_MCF7_CPT 6uM, 24 hours
3	3	90.3887		-0.0978979	0.640494		6.43682									en167951	GSE145097_2_CPT 6uM, 24 hours_MCF7_CPT 6uM, 24 hours
3	3	20.0864		0.233193	1.5518	2.97242	-1.93266									en168042	GSE145097_2_CPT 6uM, 24 hours_MCF7_CPT 6uM, 24 hours
3	3	70.3023		0.0634568	1.14268	10.9231	-12.8446									en168166	GSE145097_2_CPT 6uM, 24 hours_MCF7_CPT 6uM, 24 hours
3	3	80.3455		0.17861	1.46509	3.8808	-3.14123									en168176	GSE145097_2_CPT 6uM, 24 hours_MCF7_CPT 6uM, 24 hours
3	3	110.475		0.0978867	1.12332	7.08112	2.41428									en168550	GSE145097_2_CPT 6uM, 24 hours_MCF7_CPT 6uM, 24 hours
3	3	1054.53		0.0802624	1.16659	8.63602	-12.6797									en168551	GSE145097_2_CPT 6uM, 24 hours_MCF7_CPT 6uM, 24 hours
3	3	60.2591		0.202326	1.36925	3.4259	4.65732									en168612	GSE145097_2_CPT 6uM, 24 hours_MCF7_CPT 6uM, 24 hours
3	3	30.1296		-0.142681	0.584803		6.01508									en168826	GSE145097_2_CPT 6uM, 24 hours_MCF7_CPT 6uM, 24 hours
3	3	40.1727		0.344158	1.884	2.01404	4.08951									en168827	GSE145097_2_CPT 6uM, 24 hours_MCF7_CPT 6uM, 24 hours
3	3	50.2159		0.319704	1.84838	2.16809	-0.941681									en168828	GSE145097_2_CPT 6uM, 24 hours_MCF7_CPT 6uM, 24 hours
3	3	90.3887		0.0262649	1.04904	26.3906	-15.3149									en168869	GSE145097_2_CPT 6uM, 24 hours_MCF7_CPT 6uM, 24 hours
3	3	180.777		0.126175	1.16811	5.49353	3.9452									en168870	GSE145097_2_CPT 6uM, 24 hours_MCF7_CPT 6uM, 24 hours
3	3	743.196		0.0200592	1.02338	34.5551	-7.65774									en168871	GSE145097_2_CPT 6uM, 24 hours_MCF7_CPT 6uM, 24 hours
3	3	100.432		0.319704	1.84838	2.16809	-0.941681									en168874	GSE145097_2_CPT 6uM, 24 hours_MCF7_CPT 6uM, 24 hours
3	3	40.1727		0.129074	1.1995	5.37017	2.60471									en168884	GSE145097_2_CPT 6uM, 24 hours_MCF7_CPT 6uM, 24 hours
3	3	30.1296		0.0314863	0.982405	22.0143	1.63799									en168897	GSE145097_2_CPT 6uM, 24 hours_MCF7_CPT 6uM, 24 hours
3	3	40.1727		-0.0359557	0.839962		2.19895									en169088	GSE145097_2_CPT 6uM, 24 hours_MCF7_CPT 6uM, 24 hours
3	3	30.1296		0.398109	2.17151	1.7411	-0.673856									en169499	GSE145097_2_CPT 6uM, 24 hours_MCF7_CPT 6uM, 24 hours
3	3	30.1296		-0.0842688	0.599935		8.21007									en169565	GSE145097_2_CPT 6uM, 24 hours_MCF7_CPT 6uM, 24 hours
3	3	130.561		0.0819245	1.10385	8.46081	1.03958									en169601	GSE145097_2_CPT 6uM, 24 hours_MCF7_CPT 6uM, 24 hours
3	3	200.864		-0.0101194	0.921014		-0.39245									en169605	GSE145097_2_CPT 6uM, 24 hours_MCF7_CPT 6uM, 24 hours
3	3	20.0864		0.233193	1.5518	2.97242	-1.93266									en169767	GSE145097_2_CPT 6uM, 24 hours_MCF7_CPT 6uM, 24 hours
3	3	30.1296		-0.0842688	0.599935		8.21007									en169826	GSE145097_2_CPT 6uM, 24 hours_MCF7_CPT 6uM, 24 hours
3	3	351.511		-0.0440823	0.827584		2.02784									en169829	GSE145097_2_CPT 6uM, 24 hours_MCF7_CPT 6uM, 24 hours
3	3	461.987		0.00600829	0.941229	115.365	0.711089									en169833	GSE145097_2_CPT 6uM, 24 hours_MCF7_CPT 6uM, 24 hours
3	3	60.2591		-0.0138919	0.92289		-1.41482									en169834	GSE145097_2_CPT 6uM, 24 hours_MCF7_CPT 6uM, 24 hours
3	3	30.1296		0.136047	1.28914	5.0949	-5.74566									en16989	GSE145097_2_CPT 6uM, 24 hours_MCF7_CPT 6uM, 24 hours
3	3	20.0864		0.233193	1.5518	2.97242	-1.93266									en169907	GSE145097_2_CPT 6uM, 24 hours_MCF7_CPT 6uM, 24 hours
3	3	40.1727		0.344158	1.884	2.01404	4.08951									en170110	GSE145097_2_CPT 6uM, 24 hours_MCF7_CPT 6uM, 24 hours
3	3	50.2159		0.653457	3.66564	1.06074	-1.37631									en170147	GSE145097_2_CPT 6uM, 24 hours_MCF7_CPT 6uM, 24 hours
3	3	120.518		0.0405674	0.914718	17.0863	5.96745									en170373	GSE145097_2_CPT 6uM, 24 hours_MCF7_CPT 6uM, 24 hours
3	3	150.648		-0.217629	0.454669		7.08335									en170471	GSE145097_2_CPT 6uM, 24 hours_MCF7_CPT 6uM, 24 hours
3	3	160.691		-0.0606393	0.821984		0.110736									en1705	GSE145097_2_CPT 6uM, 24 hours_MCF7_CPT 6uM, 24 hours
3	3	70.3023		-0.105962	0.586385		7.66967									en170640	GSE145097_2_CPT 6uM, 24 hours_MCF7_CPT 6uM, 24 hours
3	3	60.2591		-0.0604795	0.755449		4.40961									en170702	GSE145097_2_CPT 6uM, 24 hours_MCF7_CPT 6uM, 24 hours
3	3	50.2159		0.169825	1.37209	4.08154	-3.75941									en170705	GSE145097_2_CPT 6uM, 24 hours_MCF7_CPT 6uM, 24 hours
3	3	220.95		0.0480277	1.11761	14.4322	-7.90871									en170727	GSE145097_2_CPT 6uM, 24 hours_MCF7_CPT 6uM, 24 hours
3	3	311.339		0.00321544	0.957695	215.568	-1.53228									en170729	GSE145097_2_CPT 6uM, 24 hours_MCF7_CPT 6uM, 24 hours
3	3	200.864		0.148903	1.26195	4.65503	1.97609									en170740	GSE145097_2_CPT 6uM, 24 hours_MCF7_CPT 6uM, 24 hours
3	3	341.468		0.0863032	1.22026	8.03153	-4.02577									en170741	GSE145097_2_CPT 6uM, 24 hours_MCF7_CPT 6uM, 24 hours
3	3	1195.14		0.0370238	1.04568	18.7216	-4.20462									en170742	GSE145097_2_CPT 6uM, 24 hours_MCF7_CPT 6uM, 24 hours
3	3	120.518		0.0314863	0.982405	22.0143	1.63799									en170743	GSE145097_2_CPT 6uM, 24 hours_MCF7_CPT 6uM, 24 hours
3	3	512.202		0.0430827	1.01381	16.0887	1.15985									en170746	GSE145097_2_CPT 6uM, 24 hours_MCF7_CPT 6uM, 24 hours
3	3	70.3023		0.11552	1.07234	6.00026	6.65806									en170748	GSE145097_2_CPT 6uM, 24 hours_MCF7_CPT 6uM, 24 hours
3	3	140.605		-0.0435965	0.833451		1.67833									en170749	GSE145097_2_CPT 6uM, 24 hours_MCF7_CPT 6uM, 24 hours
3	3	401.727		0.0603082	1.1214	11.4934	-13.3269									en170750	GSE145097_2_CPT 6uM, 24 hours_MCF7_CPT 6uM, 24 hours
3	3	180.777		0.122857	1.29218	5.64191	-9.05091									en170751	GSE145097_2_CPT 6uM, 24 hours_MCF7_CPT 6uM, 24 hours
3	3	40.1727		0.129074	1.1995	5.37017	2.60471									en170755	GSE145097_2_CPT 6uM, 24 hours_MCF7_CPT 6uM, 24 hours
3	3	40.1727		0.181323	1.26284	3.82271	6.37376									en170950	GSE145097_2_CPT 6uM, 24 hours_MCF7_CPT 6uM, 24 hours
3	3	281.209		0.213955	1.59043	3.23968	-0.294959									en171147	GSE145097_2_CPT 6uM, 24 hours_MCF7_CPT 6uM, 24 hours
3	3	863.714		0.13334	1.29312	5.19834	-9.55377									en171148	GSE145097_2_CPT 6uM, 24 hours_MCF7_CPT 6uM, 24 hours
3	3	220.95		0.0942716	1.25503	7.35266	-1.61243									en171149	GSE145097_2_CPT 6uM, 24 hours_MCF7_CPT 6uM, 24 hours
3	3	381.641		-0.0199604	0.865621		2.48834									en171183	GSE145097_2_CPT 6uM, 24 hours_MCF7_CPT 6uM, 24 hours
3	3	461.987		-0.0636432	0.785381		2.50848									en171185	GSE145097_2_CPT 6uM, 24 hours_MCF7_CPT 6uM, 24 hours
3	3	251.08		0.0748388	1.20025	9.26187	-2.85905									en171188	GSE145097_2_CPT 6uM, 24 hours_MCF7_CPT 6uM, 24 hours
3	3	150.648		0.113984	1.14006	6.08108	3.77094									en171190	GSE145097_2_CPT 6uM, 24 hours_MCF7_CPT 6uM, 24 hours
3	3	391.684		0.126629	1.29036	5.47384	-20.151									en171194	GSE145097_2_CPT 6uM, 24 hours_MCF7_CPT 6uM, 24 hours
3	3	210.907		0.142634	1.29078	4.85962	-2.65723									en171195	GSE145097_2_CPT 6uM, 24 hours_MCF7_CPT 6uM, 24 hours
3	3	261.123		0.175569	1.36549	3.948	-0.542382									en171196	GSE145097_2_CPT 6uM, 24 hours_MCF7_CPT 6uM, 24 hours
3	3	492.116		0.0836152	1.11545	8.28973	0.392567									en171197	GSE145097_2_CPT 6uM, 24 hours_MCF7_CPT 6uM, 24 hours
3	3	40.1727		0.344158	1.884	2.01404	4.08951									en171245	GSE145097_2_CPT 6uM, 24 hours_MCF7_CPT 6uM, 24 hours
3	3	90.3887		0.540163	2.95084	1.28322	-12.6913									en171259	GSE145097_2_CPT 6uM, 24 hours_MCF7_CPT 6uM, 24 hours
3	3	60.2591		-0.142681	0.584803		6.01508									en171260	GSE145097_2_CPT 6uM, 24 hours_MCF7_CPT 6uM, 24 hours
3	3	80.3455		-0.305733	0.322812		8.24632									en171271	GSE145097_2_CPT 6uM, 24 hours_MCF7_CPT 6uM, 24 hours
3	3	50.2159		-0.0265517	0.812143		4.63421									en171285	GSE145097_2_CPT 6uM, 24 hours_MCF7_CPT 6uM, 24 hours
3	3	30.1296		-0.142681	0.584803		6.01508									en171297	GSE145097_2_CPT 6uM, 24 hours_MCF7_CPT 6uM, 24 hours
3	3	271.166		0.0772045	1.1669	8.97807	-40.9234									en171322	GSE145097_2_CPT 6uM, 24 hours_MCF7_CPT 6uM, 24 hours
3	3	50.2159		0.0541303	0.869411	12.8052	8.17583									en172154	GSE145097_2_CPT 6uM, 24 hours_MCF7_CPT 6uM, 24 hours
3	3	40.1727		0.536003	2.88371	1.29318	-0.864698									en172157	GSE145097_2_CPT 6uM, 24 hours_MCF7_CPT 6uM, 24 hours
3	3	30.1296		-0.142681	0.584803		6.01508									en172159	GSE145097_2_CPT 6uM, 24 hours_MCF7_CPT 6uM, 24 hours
3	3	30.1296		0.136047	1.28914	5.0949	-5.74566									en172192	GSE145097_2_CPT 6uM, 24 hours_MCF7_CPT 6uM, 24 hours
3	3	30.1296		-0.0842688	0.599935		8.21007									en172209	GSE145097_2_CPT 6uM, 24 hours_MCF7_CPT 6uM, 24 hours
3	3	20.0864		0.233193	1.5518	2.97242	-1.93266									en172221	GSE145097_2_CPT 6uM, 24 hours_MCF7_CPT 6uM, 24 hours
3	3	30.1296		-0.400445	0.179313		9.99895									en172273	GSE145097_2_CPT 6uM, 24 hours_MCF7_CPT 6uM, 24 hours
3	3	1084.66		0.0689989	1.16394	10.0458	-8.19244									en172277	GSE145097_2_CPT 6uM, 24 hours_MCF7_CPT 6uM, 24 hours
3	3	431.857		0.0980898	1.12891	7.06646	2.07653									en172278	GSE145097_2_CPT 6uM, 24 hours_MCF7_CPT 6uM, 24 hours
3	3	1847.95		0.058805	1.11747	11.7872	-12.8734									en172279	GSE145097_2_CPT 6uM, 24 hours_MCF7_CPT 6uM, 24 hours
3	3	1335.74		0.00824546	0.994188	84.0641	-6.18784									en172281	GSE145097_2_CPT 6uM, 24 hours_MCF7_CPT 6uM, 24 hours
3	3	40.1727		0.348288	2.01907	1.99016	-8.8788									en172319	GSE145097_2_CPT 6uM, 24 hours_MCF7_CPT 6uM, 24 hours
3	3	60.2591		-0.408753	0.1976		9.45054									en172325	GSE145097_2_CPT 6uM, 24 hours_MCF7_CPT 6uM, 24 hours
3	3	120.518		0.141208	1.37393	4.9087	-1.51759									en172345	GSE145097_2_CPT 6uM, 24 hours_MCF7_CPT 6uM, 24 hours
3	3	50.2159		0.166268	1.19292	4.16886	7.20465									en172357	GSE145097_2_CPT 6uM, 24 hours_MCF7_CPT 6uM, 24 hours
3	3	40.1727		0.0293012	1.00688	23.6559	-0.971915									en172363	GSE145097_2_CPT 6uM, 24 hours_MCF7_CPT 6uM, 24 hours
3	3	40.1727		0.348288	2.01907	1.99016	-8.8788									en172374	GSE145097_2_CPT 6uM, 24 hours_MCF7_CPT 6uM, 24 hours
3	3	1054.53		-0.0357145	0.892144		-2.87444									en172396	GSE145097_2_CPT 6uM, 24 hours_MCF7_CPT 6uM, 24 hours
3	3	30.1296		-0.400445	0.179313		9.99895									en172509	GSE145097_2_CPT 6uM, 24 hours_MCF7_CPT 6uM, 24 hours
3	3	80.3455		0.249755	1.66917	2.7753	-6.01686									en172515	GSE145097_2_CPT 6uM, 24 hours_MCF7_CPT 6uM, 24 hours
3	3	20.0864		0.233193	1.5518	2.97242	-1.93266									en172517	GSE145097_2_CPT 6uM, 24 hours_MCF7_CPT 6uM, 24 hours
3	3	80.3455		-0.359576	0.177961		10.5781									en172525	GSE145097_2_CPT 6uM, 24 hours_MCF7_CPT 6uM, 24 hours
3	3	40.1727		0.233193	1.5518	2.97242	-1.93266									en172539	GSE145097_2_CPT 6uM, 24 hours_MCF7_CPT 6uM, 24 hours
3	3	622.678		-0.0872804	0.779228		-0.167024									en172864	GSE145097_2_CPT 6uM, 24 hours_MCF7_CPT 6uM, 24 hours
3	3	140.605		0.0873471	1.18586	7.93555	-15.1134									en173161	GSE145097_2_CPT 6uM, 24 hours_MCF7_CPT 6uM, 24 hours
3	3	160.691		-0.121049	0.705433		1.52181									en173198	GSE145097_2_CPT 6uM, 24 hours_MCF7_CPT 6uM, 24 hours
3	3	241.036		0.0789823	1.13115	8.77598	-2.67358									en173199	GSE145097_2_CPT 6uM, 24 hours_MCF7_CPT 6uM, 24 hours
3	3	180.777		-0.130862	0.639191		4.51315									en17321	GSE145097_2_CPT 6uM, 24 hours_MCF7_CPT 6uM, 24 hours
3	3	70.3023		0.302948	1.85694	2.288	-5.0428									en17366	GSE145097_2_CPT 6uM, 24 hours_MCF7_CPT 6uM, 24 hours
3	3	743.196		0.0666935	1.13966	10.393	-18.1581									en173683	GSE145097_2_CPT 6uM, 24 hours_MCF7_CPT 6uM, 24 hours
3	3	20.0864		0.233193	1.5518	2.97242	-1.93266									en173702	GSE145097_2_CPT 6uM, 24 hours_MCF7_CPT 6uM, 24 hours
3	3	160.691		0.211529	1.55455	3.27684	-4.51886									en173745	GSE145097_2_CPT 6uM, 24 hours_MCF7_CPT 6uM, 24 hours
3	3	40.1727		-0.24886	0.31422		9.73643									en173772	GSE145097_2_CPT 6uM, 24 hours_MCF7_CPT 6uM, 24 hours
3	3	130.561		0.21284	1.5947	3.25665	0.468268									en173790	GSE145097_2_CPT 6uM, 24 hours_MCF7_CPT 6uM, 24 hours
3	3	60.2591		0.193593	1.48177	3.58044	-11.4108									en173900	GSE145097_2_CPT 6uM, 24 hours_MCF7_CPT 6uM, 24 hours
3	3	130.561		0.175652	1.30095	3.94613	4.11682									en17406	GSE145097_2_CPT 6uM, 24 hours_MCF7_CPT 6uM, 24 hours
3	3	70.3023		0.366328	2.06715	1.89215	-8.19292									en174075	GSE145097_2_CPT 6uM, 24 hours_MCF7_CPT 6uM, 24 hours
3	3	50.2159		-0.0224481	0.889915		0.30494									en174353	GSE145097_2_CPT 6uM, 24 hours_MCF7_CPT 6uM, 24 hours
3	3	130.561		-0.0606694	0.83735		-1.54904									en174354	GSE145097_2_CPT 6uM, 24 hours_MCF7_CPT 6uM, 24 hours
3	3	50.2159		-0.0822007	0.686769		5.7125									en174363	GSE145097_2_CPT 6uM, 24 hours_MCF7_CPT 6uM, 24 hours
3	3	170.734		-0.0741352	0.681885		6.35861									en174372	GSE145097_2_CPT 6uM, 24 hours_MCF7_CPT 6uM, 24 hours
3	3	120.518		0.05237	1.07059	13.2356	-2.72324									en174373	GSE145097_2_CPT 6uM, 24 hours_MCF7_CPT 6uM, 24 hours
3	3	60.2591		0.2168	1.63703	3.19717	2.79625									en174374	GSE145097_2_CPT 6uM, 24 hours_MCF7_CPT 6uM, 24 hours
3	3	30.1296		-0.197228	0.404328		9.04185									en174378	GSE145097_2_CPT 6uM, 24 hours_MCF7_CPT 6uM, 24 hours
3	3	472.03		0.0945853	1.19995	7.32827	-12.0856									en174411	GSE145097_2_CPT 6uM, 24 hours_MCF7_CPT 6uM, 24 hours
3	3	20.0864		0.233193	1.5518	2.97242	-1.93266									en174553	GSE145097_2_CPT 6uM, 24 hours_MCF7_CPT 6uM, 24 hours
3	3	220.95		0.140795	1.36637	4.9231	-2.39374									en174587	GSE145097_2_CPT 6uM, 24 hours_MCF7_CPT 6uM, 24 hours
3	3	210.907		0.108999	1.12893	6.3592	3.69292									en174652	GSE145097_2_CPT 6uM, 24 hours_MCF7_CPT 6uM, 24 hours
3	3	40.1727		-0.18759	0.461428		7.94411									en174784	GSE145097_2_CPT 6uM, 24 hours_MCF7_CPT 6uM, 24 hours
3	3	30.1296		0.136047	1.28914	5.0949	-5.74566									en174790	GSE145097_2_CPT 6uM, 24 hours_MCF7_CPT 6uM, 24 hours
3	3	100.432		0.0987287	1.14726	7.02073	0.804086									en174792	GSE145097_2_CPT 6uM, 24 hours_MCF7_CPT 6uM, 24 hours
3	3	20.0864		0.0370085	0.936059	18.7294	4.84016									en174862	GSE145097_2_CPT 6uM, 24 hours_MCF7_CPT 6uM, 24 hours
3	3	190.821		0.142254	1.27313	4.87261	-0.541538									en174863	GSE145097_2_CPT 6uM, 24 hours_MCF7_CPT 6uM, 24 hours
3	3	50.2159		-0.0324926	0.731092		7.12202									en174864	GSE145097_2_CPT 6uM, 24 hours_MCF7_CPT 6uM, 24 hours
3	3	80.3455		0.419559	2.29704	1.65208	-6.36219									en175076	GSE145097_2_CPT 6uM, 24 hours_MCF7_CPT 6uM, 24 hours
3	3	90.3887		0.0262649	1.04904	26.3906	-15.3149									en175084	GSE145097_2_CPT 6uM, 24 hours_MCF7_CPT 6uM, 24 hours
3	3	20.0864		0.233193	1.5518	2.97242	-1.93266									en175088	GSE145097_2_CPT 6uM, 24 hours_MCF7_CPT 6uM, 24 hours
3	3	130.561		0.335975	1.91103	2.06309	-0.851377									en175089	GSE145097_2_CPT 6uM, 24 hours_MCF7_CPT 6uM, 24 hours
3	3	30.1296		0.398109	2.17151	1.7411	-0.673856									en175091	GSE145097_2_CPT 6uM, 24 hours_MCF7_CPT 6uM, 24 hours
3	3	100.432		0.185401	1.55232	3.73864	3.25457									en175155	GSE145097_2_CPT 6uM, 24 hours_MCF7_CPT 6uM, 24 hours
3	3	170.734		0.0559081	0.997733	12.398	3.92512									en175156	GSE145097_2_CPT 6uM, 24 hours_MCF7_CPT 6uM, 24 hours
3	3	70.3023		0.190892	1.3099	3.63109	5.6984									en175160	GSE145097_2_CPT 6uM, 24 hours_MCF7_CPT 6uM, 24 hours
3	3	80.3455		-0.0875742	0.759962		1.45263									en175168	GSE145097_2_CPT 6uM, 24 hours_MCF7_CPT 6uM, 24 hours
3	3	100.432		0.0759852	1.19601	9.12213	-4.03507									en175234	GSE145097_2_CPT 6uM, 24 hours_MCF7_CPT 6uM, 24 hours
3	3	200.864		0.202222	1.41905	3.42766	1.7215									en175331	GSE145097_2_CPT 6uM, 24 hours_MCF7_CPT 6uM, 24 hours
3	3	20.0864		-0.251814	0.366054		8.49363									en175333	GSE145097_2_CPT 6uM, 24 hours_MCF7_CPT 6uM, 24 hours
3	3	70.3023		0.27539	1.61623	2.51697	4.39477									en17540	GSE145097_2_CPT 6uM, 24 hours_MCF7_CPT 6uM, 24 hours
3	3	170.734		0.156633	1.37228	4.4253	-15.7724									en17542	GSE145097_2_CPT 6uM, 24 hours_MCF7_CPT 6uM, 24 hours
3	3	80.3455		0.100654	1.21211	6.88641	-10.4425									en17546	GSE145097_2_CPT 6uM, 24 hours_MCF7_CPT 6uM, 24 hours
3	3	120.518		-0.0317376	0.906059		-3.96935									en17549	GSE145097_2_CPT 6uM, 24 hours_MCF7_CPT 6uM, 24 hours
3	3	723.109		0.111434	1.18441	6.22023	0.314862									en17550	GSE145097_2_CPT 6uM, 24 hours_MCF7_CPT 6uM, 24 hours
3	3	20.0864		-0.119114	0.582147		7.22356									en17578	GSE145097_2_CPT 6uM, 24 hours_MCF7_CPT 6uM, 24 hours
3	3	652.807		0.0499971	1.03092	13.8638	1.01051									en175941	GSE145097_2_CPT 6uM, 24 hours_MCF7_CPT 6uM, 24 hours
3	3	110.475		0.268428	1.82835	2.58225	4.33207									en176047	GSE145097_2_CPT 6uM, 24 hours_MCF7_CPT 6uM, 24 hours
3	3	502.159		0.074893	1.06233	9.25517	2.77775									en176132	GSE145097_2_CPT 6uM, 24 hours_MCF7_CPT 6uM, 24 hours
3	3	40.1727		-0.388108	0.254186		8.30714									en176160	GSE145097_2_CPT 6uM, 24 hours_MCF7_CPT 6uM, 24 hours
3	3	261.123		-0.115617	0.712842		1.59866									en176284	GSE145097_2_CPT 6uM, 24 hours_MCF7_CPT 6uM, 24 hours
3	3	40.1727		0.17861	1.46509	3.8808	-3.14123									en176805	GSE145097_2_CPT 6uM, 24 hours_MCF7_CPT 6uM, 24 hours
3	3	70.3023		-0.00798594	0.946278		-3.04698									en176806	GSE145097_2_CPT 6uM, 24 hours_MCF7_CPT 6uM, 24 hours
3	3	40.1727		-0.582752	0.0935249		10.0835									en17701	GSE145097_2_CPT 6uM, 24 hours_MCF7_CPT 6uM, 24 hours
3	3	30.1296		0.254387	1.70548	2.72478	-1.87751									en177032	GSE145097_2_CPT 6uM, 24 hours_MCF7_CPT 6uM, 24 hours
3	3	30.1296		0.398109	2.17151	1.7411	-0.673856									en17705	GSE145097_2_CPT 6uM, 24 hours_MCF7_CPT 6uM, 24 hours
3	3	60.2591		-0.0158986	0.86062		3.24589									en177055	GSE145097_2_CPT 6uM, 24 hours_MCF7_CPT 6uM, 24 hours
3	3	130.561		0.00798206	0.984267	86.8382	-4.09138									en177136	GSE145097_2_CPT 6uM, 24 hours_MCF7_CPT 6uM, 24 hours
3	3	90.3887		0.0286391	1.01519	24.2028	-2.17483									en177193	GSE145097_2_CPT 6uM, 24 hours_MCF7_CPT 6uM, 24 hours
3	3	120.518		0.0405674	0.914718	17.0863	5.96745									en17726	GSE145097_2_CPT 6uM, 24 hours_MCF7_CPT 6uM, 24 hours
3	3	40.1727		0.262595	1.77468	2.63961	2.2746									en177509	GSE145097_2_CPT 6uM, 24 hours_MCF7_CPT 6uM, 24 hours
3	3	140.605		-0.604199	0.113445		9.28425									en177530	GSE145097_2_CPT 6uM, 24 hours_MCF7_CPT 6uM, 24 hours
3	3	20.0864		0.233193	1.5518	2.97242	-1.93266									en177546	GSE145097_2_CPT 6uM, 24 hours_MCF7_CPT 6uM, 24 hours
3	3	40.1727		0.536003	2.88371	1.29318	-0.864698									en177619	GSE145097_2_CPT 6uM, 24 hours_MCF7_CPT 6uM, 24 hours
3	3	20.0864		-0.251814	0.366054		8.49363									en177635	GSE145097_2_CPT 6uM, 24 hours_MCF7_CPT 6uM, 24 hours
3	3	20.0864		0.233193	1.5518	2.97242	-1.93266									en177733	GSE145097_2_CPT 6uM, 24 hours_MCF7_CPT 6uM, 24 hours
3	3	30.1296		0.202326	1.36925	3.4259	4.65732									en177760	GSE145097_2_CPT 6uM, 24 hours_MCF7_CPT 6uM, 24 hours
3	3	60.2591		-0.192172	0.538377		5.19864									en177769	GSE145097_2_CPT 6uM, 24 hours_MCF7_CPT 6uM, 24 hours
3	3	20.0864		0.233193	1.5518	2.97242	-1.93266									en177870	GSE145097_2_CPT 6uM, 24 hours_MCF7_CPT 6uM, 24 hours
3	3	30.1296		0.254387	1.70548	2.72478	-1.87751									en178133	GSE145097_2_CPT 6uM, 24 hours_MCF7_CPT 6uM, 24 hours
3	3	40.1727		0.344158	1.884	2.01404	4.08951									en178138	GSE145097_2_CPT 6uM, 24 hours_MCF7_CPT 6uM, 24 hours
3	3	30.1296		0.254387	1.70548	2.72478	-1.87751									en178144	GSE145097_2_CPT 6uM, 24 hours_MCF7_CPT 6uM, 24 hours
3	3	50.2159		0.266941	1.81427	2.59663	3.84848									en178145	GSE145097_2_CPT 6uM, 24 hours_MCF7_CPT 6uM, 24 hours
3	3	70.3023		0.571629	3.12823	1.21258	-9.31744									en178195	GSE145097_2_CPT 6uM, 24 hours_MCF7_CPT 6uM, 24 hours
3	3	50.2159		0.0413637	0.910646	16.7574	6.1695									en178261	GSE145097_2_CPT 6uM, 24 hours_MCF7_CPT 6uM, 24 hours
3	3	60.2591		0.0314863	0.982405	22.0143	1.63799									en178273	GSE145097_2_CPT 6uM, 24 hours_MCF7_CPT 6uM, 24 hours
3	3	60.2591		0.2168	1.63703	3.19717	2.79625									en178277	GSE145097_2_CPT 6uM, 24 hours_MCF7_CPT 6uM, 24 hours
3	3	20.0864		0.233193	1.5518	2.97242	-1.93266									en178280	GSE145097_2_CPT 6uM, 24 hours_MCF7_CPT 6uM, 24 hours
3	3	60.2591		0.233193	1.5518	2.97242	-1.93266									en178361	GSE145097_2_CPT 6uM, 24 hours_MCF7_CPT 6uM, 24 hours
3	3	271.166		0.0177727	1.01251	39.0008	-5.86434									en178509	GSE145097_2_CPT 6uM, 24 hours_MCF7_CPT 6uM, 24 hours
3	3	40.1727		0.536003	2.88371	1.29318	-0.864698									en178512	GSE145097_2_CPT 6uM, 24 hours_MCF7_CPT 6uM, 24 hours
3	3	100.432		0.222081	1.59844	3.12115	-2.43925									en178514	GSE145097_2_CPT 6uM, 24 hours_MCF7_CPT 6uM, 24 hours
3	3	50.2159		0.471564	2.48475	1.46989	3.4258									en178530	GSE145097_2_CPT 6uM, 24 hours_MCF7_CPT 6uM, 24 hours
3	3	30.1296		-0.0842688	0.599935		8.21007									en178751	GSE145097_2_CPT 6uM, 24 hours_MCF7_CPT 6uM, 24 hours
3	3	120.518		0.165837	1.45631	4.17969	0.226523									en178752	GSE145097_2_CPT 6uM, 24 hours_MCF7_CPT 6uM, 24 hours
3	3	60.2591		0.165837	1.45631	4.17969	0.226523									en178757	GSE145097_2_CPT 6uM, 24 hours_MCF7_CPT 6uM, 24 hours
3	3	40.1727		0.100654	1.21211	6.88641	-10.4425									en179676	GSE145097_2_CPT 6uM, 24 hours_MCF7_CPT 6uM, 24 hours
3	3	30.1296		0.202326	1.36925	3.4259	4.65732									en179759	GSE145097_2_CPT 6uM, 24 hours_MCF7_CPT 6uM, 24 hours
3	3	301.296		0.146849	1.22796	4.72014	3.70555									en179768	GSE145097_2_CPT 6uM, 24 hours_MCF7_CPT 6uM, 24 hours
3	3	80.3455		-0.00366328	0.96373		-4.65587									en179774	GSE145097_2_CPT 6uM, 24 hours_MCF7_CPT 6uM, 24 hours
3	3	60.2591		0.193593	1.48177	3.58044	-11.4108									en179873	GSE145097_2_CPT 6uM, 24 hours_MCF7_CPT 6uM, 24 hours
3	3	20.0864		0.233193	1.5518	2.97242	-1.93266									en179883	GSE145097_2_CPT 6uM, 24 hours_MCF7_CPT 6uM, 24 hours
3	3	110.475		0.0277277	1.02739	24.9984	-4.51464									en179885	GSE145097_2_CPT 6uM, 24 hours_MCF7_CPT 6uM, 24 hours
3	3	50.2159		-0.156616	0.59502		4.82122									en179895	GSE145097_2_CPT 6uM, 24 hours_MCF7_CPT 6uM, 24 hours
3	3	20.0864		0.233193	1.5518	2.97242	-1.93266									en179998	GSE145097_2_CPT 6uM, 24 hours_MCF7_CPT 6uM, 24 hours
3	3	40.1727		0.100654	1.21211	6.88641	-10.4425									en180	GSE145097_2_CPT 6uM, 24 hours_MCF7_CPT 6uM, 24 hours
3	3	40.1727		-0.119114	0.582147		7.22356									en180015	GSE145097_2_CPT 6uM, 24 hours_MCF7_CPT 6uM, 24 hours
3	3	60.2591		0.165837	1.45631	4.17969	0.226523									en180023	GSE145097_2_CPT 6uM, 24 hours_MCF7_CPT 6uM, 24 hours
3	3	351.511		0.118102	1.24027	5.86907	-5.1568									en180027	GSE145097_2_CPT 6uM, 24 hours_MCF7_CPT 6uM, 24 hours
3	3	672.893		0.140003	1.22451	4.95094	2.8515									en180028	GSE145097_2_CPT 6uM, 24 hours_MCF7_CPT 6uM, 24 hours
3	3	70.3023		0.0818164	1.08655	8.47199	2.28035									en180029	GSE145097_2_CPT 6uM, 24 hours_MCF7_CPT 6uM, 24 hours
3	3	813.498		0.111605	1.21259	6.2107	-3.00872									en180030	GSE145097_2_CPT 6uM, 24 hours_MCF7_CPT 6uM, 24 hours
3	3	60.2591		0.119161	1.1022	5.81689	5.96508									en180031	GSE145097_2_CPT 6uM, 24 hours_MCF7_CPT 6uM, 24 hours
3	3	60.2591		0.165837	1.45631	4.17969	0.226523									en180051	GSE145097_2_CPT 6uM, 24 hours_MCF7_CPT 6uM, 24 hours
3	3	20.0864		0.0370085	0.936059	18.7294	4.84016									en180345	GSE145097_2_CPT 6uM, 24 hours_MCF7_CPT 6uM, 24 hours
3	3	30.1296		0.0448882	0.895156	15.4416	6.91569									en180349	GSE145097_2_CPT 6uM, 24 hours_MCF7_CPT 6uM, 24 hours
3	3	40.1727		0.181323	1.26284	3.82271	6.37376									en180367	GSE145097_2_CPT 6uM, 24 hours_MCF7_CPT 6uM, 24 hours
3	3	40.1727		-0.0359557	0.839962		2.19895									en180378	GSE145097_2_CPT 6uM, 24 hours_MCF7_CPT 6uM, 24 hours
3	3	30.1296		-0.400445	0.179313		9.99895									en180379	GSE145097_2_CPT 6uM, 24 hours_MCF7_CPT 6uM, 24 hours
3	3	190.821		-0.0233141	0.919913		-3.59824									en18039	GSE145097_2_CPT 6uM, 24 hours_MCF7_CPT 6uM, 24 hours
3	3	60.2591		0.0314863	0.982405	22.0143	1.63799									en180554	GSE145097_2_CPT 6uM, 24 hours_MCF7_CPT 6uM, 24 hours
3	3	40.1727		-0.0449166	0.736323		6.2453									en180556	GSE145097_2_CPT 6uM, 24 hours_MCF7_CPT 6uM, 24 hours
3	3	30.1296		0.398109	2.17151	1.7411	-0.673856									en180650	GSE145097_2_CPT 6uM, 24 hours_MCF7_CPT 6uM, 24 hours
3	3	150.648		-0.105029	0.679172		4.50267									en180653	GSE145097_2_CPT 6uM, 24 hours_MCF7_CPT 6uM, 24 hours
3	3	20.0864		-0.759603	0.0421255		10.467									en180659	GSE145097_2_CPT 6uM, 24 hours_MCF7_CPT 6uM, 24 hours
3	3	30.1296		-0.0842688	0.599935		8.21007									en180660	GSE145097_2_CPT 6uM, 24 hours_MCF7_CPT 6uM, 24 hours
3	3	170.734		-0.0391814	0.759039		5.8159									en180663	GSE145097_2_CPT 6uM, 24 hours_MCF7_CPT 6uM, 24 hours
3	3	50.2159		-0.128142	0.479113		9.39591									en180675	GSE145097_2_CPT 6uM, 24 hours_MCF7_CPT 6uM, 24 hours
3	3	50.2159		-0.0324926	0.731092		7.12202									en180681	GSE145097_2_CPT 6uM, 24 hours_MCF7_CPT 6uM, 24 hours
3	3	60.2591		0.295644	1.71824	2.34453	2.71228									en180865	GSE145097_2_CPT 6uM, 24 hours_MCF7_CPT 6uM, 24 hours
3	3	80.3455		0.138807	1.33202	4.99359	-9.76859									en181126	GSE145097_2_CPT 6uM, 24 hours_MCF7_CPT 6uM, 24 hours
3	3	110.475		0.197677	1.5221	3.50646	-2.84478									en181210	GSE145097_2_CPT 6uM, 24 hours_MCF7_CPT 6uM, 24 hours
3	3	271.166		0.115681	1.21033	5.99188	-1.27649									en181212	GSE145097_2_CPT 6uM, 24 hours_MCF7_CPT 6uM, 24 hours
3	3	230.993		0.0954983	1.17515	7.25821	-3.39713									en181213	GSE145097_2_CPT 6uM, 24 hours_MCF7_CPT 6uM, 24 hours
3	3	1878.08		0.00797612	1.01412	86.9028	-20.8118									en181216	GSE145097_2_CPT 6uM, 24 hours_MCF7_CPT 6uM, 24 hours
3	3	1094.71		0.0578881	1.04217	11.9739	1.5087									en181217	GSE145097_2_CPT 6uM, 24 hours_MCF7_CPT 6uM, 24 hours
3	3	110.475		0.318396	1.90994	2.177	-6.21353									en181354	GSE145097_2_CPT 6uM, 24 hours_MCF7_CPT 6uM, 24 hours
3	3	80.3455		-0.0399379	0.788983		4.55742									en181391	GSE145097_2_CPT 6uM, 24 hours_MCF7_CPT 6uM, 24 hours
3	3	40.1727		-0.0960155	0.703282		4.04437									en181401	GSE145097_2_CPT 6uM, 24 hours_MCF7_CPT 6uM, 24 hours
3	3	40.1727		-0.300336	0.354107		7.48323									en181482	GSE145097_2_CPT 6uM, 24 hours_MCF7_CPT 6uM, 24 hours
3	3	80.3455		0.276755	1.66184	2.50455	1.86001									en181670	GSE145097_2_CPT 6uM, 24 hours_MCF7_CPT 6uM, 24 hours
3	3	60.2591		0.254387	1.70548	2.72478	-1.87751									en181672	GSE145097_2_CPT 6uM, 24 hours_MCF7_CPT 6uM, 24 hours
3	3	110.475		0.167443	1.4174	4.1396	-6.77147									en181677	GSE145097_2_CPT 6uM, 24 hours_MCF7_CPT 6uM, 24 hours
3	3	30.1296		-0.0604795	0.755449		4.40961									en181966	GSE145097_2_CPT 6uM, 24 hours_MCF7_CPT 6uM, 24 hours
3	3	30.1296		0.136047	1.28914	5.0949	-5.74566									en181968	GSE145097_2_CPT 6uM, 24 hours_MCF7_CPT 6uM, 24 hours
3	3	80.3455		0.234322	1.72082	2.9581	4.45812									en181971	GSE145097_2_CPT 6uM, 24 hours_MCF7_CPT 6uM, 24 hours
3	3	20.0864		0.0370085	0.936059	18.7294	4.84016									en181988	GSE145097_2_CPT 6uM, 24 hours_MCF7_CPT 6uM, 24 hours
3	3	160.691		-0.0490008	0.829339		1.25251									en182083	GSE145097_2_CPT 6uM, 24 hours_MCF7_CPT 6uM, 24 hours
3	3	40.1727		0.344158	1.884	2.01404	4.08951									en182108	GSE145097_2_CPT 6uM, 24 hours_MCF7_CPT 6uM, 24 hours
3	3	1506.48		0.107062	1.25949	6.47426	-6.57552									en182110	GSE145097_2_CPT 6uM, 24 hours_MCF7_CPT 6uM, 24 hours
3	3	80.3455		0.100654	1.21211	6.88641	-10.4425									en182111	GSE145097_2_CPT 6uM, 24 hours_MCF7_CPT 6uM, 24 hours
3	3	150.648		0.0413637	0.910646	16.7574	6.1695									en182112	GSE145097_2_CPT 6uM, 24 hours_MCF7_CPT 6uM, 24 hours
3	3	70.3023		0.226937	1.68511	3.05435	3.79945									en182113	GSE145097_2_CPT 6uM, 24 hours_MCF7_CPT 6uM, 24 hours
3	3	60.2591		-0.0703971	0.680571		6.6079									en182114	GSE145097_2_CPT 6uM, 24 hours_MCF7_CPT 6uM, 24 hours
3	3	241.036		0.0489203	1.09195	14.1689	-10.5361									en182115	GSE145097_2_CPT 6uM, 24 hours_MCF7_CPT 6uM, 24 hours
3	3	50.2159		0.216176	1.44654	3.20641	2.80115									en182117	GSE145097_2_CPT 6uM, 24 hours_MCF7_CPT 6uM, 24 hours
3	3	472.03		0.126567	1.20465	5.47654	1.81698									en182118	GSE145097_2_CPT 6uM, 24 hours_MCF7_CPT 6uM, 24 hours
3	3	50.2159		-0.183332	0.494111		7.17311									en182119	GSE145097_2_CPT 6uM, 24 hours_MCF7_CPT 6uM, 24 hours
3	3	391.684		-0.0411281	0.791513		4.3432									en182120	GSE145097_2_CPT 6uM, 24 hours_MCF7_CPT 6uM, 24 hours
3	3	210.907		-0.0808237	0.784461		0.362083									en182183	GSE145097_2_CPT 6uM, 24 hours_MCF7_CPT 6uM, 24 hours
3	3	40.1727		0.100654	1.21211	6.88641	-10.4425									en18246	GSE145097_2_CPT 6uM, 24 hours_MCF7_CPT 6uM, 24 hours
3	3	30.1296		0.254387	1.70548	2.72478	-1.87751									en183532	GSE145097_2_CPT 6uM, 24 hours_MCF7_CPT 6uM, 24 hours
3	3	30.1296		0.254387	1.70548	2.72478	-1.87751									en183564	GSE145097_2_CPT 6uM, 24 hours_MCF7_CPT 6uM, 24 hours
3	3	30.1296		0.398109	2.17151	1.7411	-0.673856									en1839	GSE145097_2_CPT 6uM, 24 hours_MCF7_CPT 6uM, 24 hours
3	3	80.3455		-0.0719183	0.559051		9.54864									en18441	GSE145097_2_CPT 6uM, 24 hours_MCF7_CPT 6uM, 24 hours
3	3	90.3887		-0.000480546	0.860187		4.74699									en18478	GSE145097_2_CPT 6uM, 24 hours_MCF7_CPT 6uM, 24 hours
3	3	20.0864		0.0370085	0.936059	18.7294	4.84016									en185094	GSE145097_2_CPT 6uM, 24 hours_MCF7_CPT 6uM, 24 hours
3	3	200.864		0.169825	1.37209	4.08154	-3.75941									en18610	GSE145097_2_CPT 6uM, 24 hours_MCF7_CPT 6uM, 24 hours
3	3	30.1296		0.254387	1.70548	2.72478	-1.87751									en188	GSE145097_2_CPT 6uM, 24 hours_MCF7_CPT 6uM, 24 hours
3	3	130.561		-0.0326392	0.828656		3.25611									en18910	GSE145097_2_CPT 6uM, 24 hours_MCF7_CPT 6uM, 24 hours
3	3	50.2159		-0.222203	0.384229		8.83505									en1893	GSE145097_2_CPT 6uM, 24 hours_MCF7_CPT 6uM, 24 hours
3	3	60.2591		0.117192	1.29656	5.91464	-3.86949									en18953	GSE145097_2_CPT 6uM, 24 hours_MCF7_CPT 6uM, 24 hours
3	3	90.3887		0.152512	1.29651	4.54486	-0.086902									en19017	GSE145097_2_CPT 6uM, 24 hours_MCF7_CPT 6uM, 24 hours
3	3	20.0864		0.233193	1.5518	2.97242	-1.93266									en19045	GSE145097_2_CPT 6uM, 24 hours_MCF7_CPT 6uM, 24 hours
3	3	90.3887		-0.0978979	0.640494		6.43682									en19058	GSE145097_2_CPT 6uM, 24 hours_MCF7_CPT 6uM, 24 hours
3	3	150.648		0.0137956	0.888134	50.2441	4.79107									en1915	GSE145097_2_CPT 6uM, 24 hours_MCF7_CPT 6uM, 24 hours
3	3	20.0864		0.233193	1.5518	2.97242	-1.93266									en19183	GSE145097_2_CPT 6uM, 24 hours_MCF7_CPT 6uM, 24 hours
3	3	30.1296		0.254387	1.70548	2.72478	-1.87751									en19355	GSE145097_2_CPT 6uM, 24 hours_MCF7_CPT 6uM, 24 hours
3	3	40.1727		0.233193	1.5518	2.97242	-1.93266									en19357	GSE145097_2_CPT 6uM, 24 hours_MCF7_CPT 6uM, 24 hours
3	3	1064.58		-0.0758805	0.796108		0.0595286									en1940	GSE145097_2_CPT 6uM, 24 hours_MCF7_CPT 6uM, 24 hours
3	3	6357.34		-0.00140717	0.956447		-2.60973									en1943	GSE145097_2_CPT 6uM, 24 hours_MCF7_CPT 6uM, 24 hours
3	3	2330.02		0.0135889	1.02027	51.0082	-12.9435									en1957	GSE145097_2_CPT 6uM, 24 hours_MCF7_CPT 6uM, 24 hours
3	3	20.0864		-0.582752	0.0935249		10.0835									en19692	GSE145097_2_CPT 6uM, 24 hours_MCF7_CPT 6uM, 24 hours
3	3	80.3455		0.917428	6.25031	0.755533	-3.12453									en198	GSE145097_2_CPT 6uM, 24 hours_MCF7_CPT 6uM, 24 hours
3	3	30.1296		-0.197228	0.404328		9.04185									en20220	GSE145097_2_CPT 6uM, 24 hours_MCF7_CPT 6uM, 24 hours
3	3	110.475		0.089328	1.13364	7.75957	-0.0297835									en2053	GSE145097_2_CPT 6uM, 24 hours_MCF7_CPT 6uM, 24 hours
3	3	120.518		0.406031	2.17013	1.70713	2.92273									en20543	GSE145097_2_CPT 6uM, 24 hours_MCF7_CPT 6uM, 24 hours
3	3	70.3023		0.0344201	0.955415	20.1379	3.66978									en20661	GSE145097_2_CPT 6uM, 24 hours_MCF7_CPT 6uM, 24 hours
3	3	180.777		0.197511	1.61457	3.50942	4.67061									en20665	GSE145097_2_CPT 6uM, 24 hours_MCF7_CPT 6uM, 24 hours
3	3	200.864		0.146638	1.35754	4.72693	-7.77776									en20748	GSE145097_2_CPT 6uM, 24 hours_MCF7_CPT 6uM, 24 hours
3	3	70.3023		0.10176	1.25774	6.81158	-3.97005									en20753	GSE145097_2_CPT 6uM, 24 hours_MCF7_CPT 6uM, 24 hours
3	3	80.3455		0.179583	1.36277	3.85976	0.840135									en20754	GSE145097_2_CPT 6uM, 24 hours_MCF7_CPT 6uM, 24 hours
3	3	40.1727		0.262595	1.77468	2.63961	2.2746									en20758	GSE145097_2_CPT 6uM, 24 hours_MCF7_CPT 6uM, 24 hours
3	3	40.1727		0.100654	1.21211	6.88641	-10.4425									en20759	GSE145097_2_CPT 6uM, 24 hours_MCF7_CPT 6uM, 24 hours
3	3	20.0864		0.233193	1.5518	2.97242	-1.93266									en20762	GSE145097_2_CPT 6uM, 24 hours_MCF7_CPT 6uM, 24 hours
3	3	110.475		-0.0606011	0.803829		1.6181									en2098	GSE145097_2_CPT 6uM, 24 hours_MCF7_CPT 6uM, 24 hours
3	3	20.0864		0.233193	1.5518	2.97242	-1.93266									en20982	GSE145097_2_CPT 6uM, 24 hours_MCF7_CPT 6uM, 24 hours
3	3	271.166		0.0363632	1.06351	19.0618	-9.96811									en2099	GSE145097_2_CPT 6uM, 24 hours_MCF7_CPT 6uM, 24 hours
3	3	80.3455		0.113071	1.20048	6.13018	-0.89805									en2101	GSE145097_2_CPT 6uM, 24 hours_MCF7_CPT 6uM, 24 hours
3	3	421.814		0.00340399	0.984417	203.628	-6.19519									en2105	GSE145097_2_CPT 6uM, 24 hours_MCF7_CPT 6uM, 24 hours
3	3	40.1727		0.348288	2.01907	1.99016	-8.8788									en21090	GSE145097_2_CPT 6uM, 24 hours_MCF7_CPT 6uM, 24 hours
3	3	140.605		0.107977	1.24873	6.41937	-12.5227									en21475	GSE145097_2_CPT 6uM, 24 hours_MCF7_CPT 6uM, 24 hours
3	3	40.1727		-0.151789	0.590562		5.29822									en2152	GSE145097_2_CPT 6uM, 24 hours_MCF7_CPT 6uM, 24 hours
3	3	30.1296		0.398109	2.17151	1.7411	-0.673856									en2153	GSE145097_2_CPT 6uM, 24 hours_MCF7_CPT 6uM, 24 hours
3	3	20.0864		-0.251814	0.366054		8.49363									en21605	GSE145097_2_CPT 6uM, 24 hours_MCF7_CPT 6uM, 24 hours
3	3	30.1296		0.136047	1.28914	5.0949	-5.74566									en2181	GSE145097_2_CPT 6uM, 24 hours_MCF7_CPT 6uM, 24 hours
3	3	40.1727		0.344158	1.884	2.01404	4.08951									en21983	GSE145097_2_CPT 6uM, 24 hours_MCF7_CPT 6uM, 24 hours
3	3	40.1727		0.129074	1.1995	5.37017	2.60471									en22074	GSE145097_2_CPT 6uM, 24 hours_MCF7_CPT 6uM, 24 hours
3	3	20.0864		0.233193	1.5518	2.97242	-1.93266									en22130	GSE145097_2_CPT 6uM, 24 hours_MCF7_CPT 6uM, 24 hours
3	3	80.3455		0.0293012	1.00688	23.6559	-0.971915									en22184	GSE145097_2_CPT 6uM, 24 hours_MCF7_CPT 6uM, 24 hours
3	3	100.432		0.278153	1.72378	2.49196	-6.13104									en22187	GSE145097_2_CPT 6uM, 24 hours_MCF7_CPT 6uM, 24 hours
3	3	20.0864		0.233193	1.5518	2.97242	-1.93266									en22191	GSE145097_2_CPT 6uM, 24 hours_MCF7_CPT 6uM, 24 hours
3	3	60.2591		0.162399	1.30567	4.26817	1.50417									en22192	GSE145097_2_CPT 6uM, 24 hours_MCF7_CPT 6uM, 24 hours
3	3	241.036		0.317754	1.7902	2.1814	3.44727									en22199	GSE145097_2_CPT 6uM, 24 hours_MCF7_CPT 6uM, 24 hours
3	3	50.2159		-0.363437	0.187467		10.3372									en2222	GSE145097_2_CPT 6uM, 24 hours_MCF7_CPT 6uM, 24 hours
3	3	20.0864		-0.119114	0.582147		7.22356									en22272	GSE145097_2_CPT 6uM, 24 hours_MCF7_CPT 6uM, 24 hours
3	3	70.3023		-0.00798594	0.946278		-3.04698									en22658	GSE145097_2_CPT 6uM, 24 hours_MCF7_CPT 6uM, 24 hours
3	3	160.691		0.124777	1.33749	5.55508	-0.791325									en22659	GSE145097_2_CPT 6uM, 24 hours_MCF7_CPT 6uM, 24 hours
3	3	120.518		0.136047	1.28914	5.0949	-5.74566									en22663	GSE145097_2_CPT 6uM, 24 hours_MCF7_CPT 6uM, 24 hours
3	3	281.209		-0.0435965	0.833451		1.67833									en22664	GSE145097_2_CPT 6uM, 24 hours_MCF7_CPT 6uM, 24 hours
3	3	40.1727		-0.0359557	0.839962		2.19895									en22864	GSE145097_2_CPT 6uM, 24 hours_MCF7_CPT 6uM, 24 hours
3	3	60.2591		0.504873	2.73842	1.37291	-11.6421									en23100	GSE145097_2_CPT 6uM, 24 hours_MCF7_CPT 6uM, 24 hours
3	3	20.0864		-0.119114	0.582147		7.22356									en237	GSE145097_2_CPT 6uM, 24 hours_MCF7_CPT 6uM, 24 hours
3	3	50.2159		0.246784	1.64676	2.80872	-11.4508									en23718	GSE145097_2_CPT 6uM, 24 hours_MCF7_CPT 6uM, 24 hours
3	3	30.1296		0.0314863	0.982405	22.0143	1.63799									en2377	GSE145097_2_CPT 6uM, 24 hours_MCF7_CPT 6uM, 24 hours
3	3	40.1727		0.129074	1.1995	5.37017	2.60471									en23864	GSE145097_2_CPT 6uM, 24 hours_MCF7_CPT 6uM, 24 hours
3	3	60.2591		0.136047	1.28914	5.0949	-5.74566									en24221	GSE145097_2_CPT 6uM, 24 hours_MCF7_CPT 6uM, 24 hours
3	3	90.3887		0.0588249	1.09933	11.7832	-5.38856									en24222	GSE145097_2_CPT 6uM, 24 hours_MCF7_CPT 6uM, 24 hours
3	3	70.3023		-0.0921704	0.657064		6.18904									en24226	GSE145097_2_CPT 6uM, 24 hours_MCF7_CPT 6uM, 24 hours
3	3	40.1727		0.233193	1.5518	2.97242	-1.93266									en24228	GSE145097_2_CPT 6uM, 24 hours_MCF7_CPT 6uM, 24 hours
3	3	40.1727		-0.31279	0.290409		8.92243									en24233	GSE145097_2_CPT 6uM, 24 hours_MCF7_CPT 6uM, 24 hours
3	3	30.1296		0.0314863	0.982405	22.0143	1.63799									en24234	GSE145097_2_CPT 6uM, 24 hours_MCF7_CPT 6uM, 24 hours
3	3	80.3455		0.156496	1.33828	4.42916	-4.4056									en24238	GSE145097_2_CPT 6uM, 24 hours_MCF7_CPT 6uM, 24 hours
3	3	241.036		0.0158434	1.0305	43.7499	-21.683									en24242	GSE145097_2_CPT 6uM, 24 hours_MCF7_CPT 6uM, 24 hours
3	3	60.2591		0.154997	1.14347	4.47201	7.69892									en24243	GSE145097_2_CPT 6uM, 24 hours_MCF7_CPT 6uM, 24 hours
3	3	20.0864		0.233193	1.5518	2.97242	-1.93266									en24244	GSE145097_2_CPT 6uM, 24 hours_MCF7_CPT 6uM, 24 hours
3	3	140.605		0.0475965	1.07049	14.563	-4.55251									en24245	GSE145097_2_CPT 6uM, 24 hours_MCF7_CPT 6uM, 24 hours
3	3	391.684		0.0708558	1.17975	9.78251	-4.9264									en24246	GSE145097_2_CPT 6uM, 24 hours_MCF7_CPT 6uM, 24 hours
3	3	70.3023		-0.0171048	0.678306		9.12803									en24247	GSE145097_2_CPT 6uM, 24 hours_MCF7_CPT 6uM, 24 hours
3	3	50.2159		0.0987287	1.14726	7.02073	0.804086									en24250	GSE145097_2_CPT 6uM, 24 hours_MCF7_CPT 6uM, 24 hours
3	3	200.864		0.407082	2.22314	1.70272	-2.3568									en24335	GSE145097_2_CPT 6uM, 24 hours_MCF7_CPT 6uM, 24 hours
3	3	602.591		0.146837	1.40619	4.72052	0.351156									en24573	GSE145097_2_CPT 6uM, 24 hours_MCF7_CPT 6uM, 24 hours
3	3	130.561		0.0307801	0.989861	22.5193	0.948727									en247	GSE145097_2_CPT 6uM, 24 hours_MCF7_CPT 6uM, 24 hours
3	3	30.1296		0.202326	1.36925	3.4259	4.65732									en24715	GSE145097_2_CPT 6uM, 24 hours_MCF7_CPT 6uM, 24 hours
3	3	20.0864		0.233193	1.5518	2.97242	-1.93266									en24725	GSE145097_2_CPT 6uM, 24 hours_MCF7_CPT 6uM, 24 hours
3	3	20.0864		0.233193	1.5518	2.97242	-1.93266									en24777	GSE145097_2_CPT 6uM, 24 hours_MCF7_CPT 6uM, 24 hours
3	3	70.3023		-0.105962	0.586385		7.66967									en24816	GSE145097_2_CPT 6uM, 24 hours_MCF7_CPT 6uM, 24 hours
3	3	70.3023		0.221451	1.47782	3.13002	1.78559									en24820	GSE145097_2_CPT 6uM, 24 hours_MCF7_CPT 6uM, 24 hours
3	3	20.0864		-0.251814	0.366054		8.49363									en24823	GSE145097_2_CPT 6uM, 24 hours_MCF7_CPT 6uM, 24 hours
3	3	150.648		0.0413637	0.910646	16.7574	6.1695									en24834	GSE145097_2_CPT 6uM, 24 hours_MCF7_CPT 6uM, 24 hours
3	3	20.0864		0.0370085	0.936059	18.7294	4.84016									en24837	GSE145097_2_CPT 6uM, 24 hours_MCF7_CPT 6uM, 24 hours
3	3	30.1296		0.136047	1.28914	5.0949	-5.74566									en24838	GSE145097_2_CPT 6uM, 24 hours_MCF7_CPT 6uM, 24 hours
3	3	90.3887		0.0538519	1.12681	12.8713	-9.4002									en24842	GSE145097_2_CPT 6uM, 24 hours_MCF7_CPT 6uM, 24 hours
3	3	100.432		0.0334839	0.963385	20.7009	3.12913									en24843	GSE145097_2_CPT 6uM, 24 hours_MCF7_CPT 6uM, 24 hours
3	3	40.1727		-0.0359557	0.839962		2.19895									en24950	GSE145097_2_CPT 6uM, 24 hours_MCF7_CPT 6uM, 24 hours
3	3	40.1727		0.348288	2.01907	1.99016	-8.8788									en2496	GSE145097_2_CPT 6uM, 24 hours_MCF7_CPT 6uM, 24 hours
3	3	30.1296		0.202326	1.36925	3.4259	4.65732									en2508	GSE145097_2_CPT 6uM, 24 hours_MCF7_CPT 6uM, 24 hours
3	3	50.2159		0.653457	3.66564	1.06074	-1.37631									en2520	GSE145097_2_CPT 6uM, 24 hours_MCF7_CPT 6uM, 24 hours
3	3	20.0864		-0.119114	0.582147		7.22356									en25585	GSE145097_2_CPT 6uM, 24 hours_MCF7_CPT 6uM, 24 hours
3	3	50.2159		0.303528	1.68932	2.28364	5.77014									en25588	GSE145097_2_CPT 6uM, 24 hours_MCF7_CPT 6uM, 24 hours
3	3	70.3023		-0.235792	0.404732		7.93289									en25805	GSE145097_2_CPT 6uM, 24 hours_MCF7_CPT 6uM, 24 hours
3	3	30.1296		0.0448882	0.895156	15.4416	6.91569									en25814	GSE145097_2_CPT 6uM, 24 hours_MCF7_CPT 6uM, 24 hours
3	3	994.275		0.0229422	1.05814	30.2127	-10.3623									en25829	GSE145097_2_CPT 6uM, 24 hours_MCF7_CPT 6uM, 24 hours
3	3	30.1296		-0.217629	0.454669		7.08335									en25846	GSE145097_2_CPT 6uM, 24 hours_MCF7_CPT 6uM, 24 hours
3	3	30.1296		0.398109	2.17151	1.7411	-0.673856									en25847	GSE145097_2_CPT 6uM, 24 hours_MCF7_CPT 6uM, 24 hours
3	3	40.1727		0.0502463	0.878056	13.795	7.73388									en25858	GSE145097_2_CPT 6uM, 24 hours_MCF7_CPT 6uM, 24 hours
3	3	30.1296		-0.217629	0.454669		7.08335									en25875	GSE145097_2_CPT 6uM, 24 hours_MCF7_CPT 6uM, 24 hours
3	3	120.518		-0.0138919	0.92289		-1.41482									en25900	GSE145097_2_CPT 6uM, 24 hours_MCF7_CPT 6uM, 24 hours
3	3	321.382		0.0351139	1.05706	19.74	-8.32434									en25903	GSE145097_2_CPT 6uM, 24 hours_MCF7_CPT 6uM, 24 hours
3	3	1004.32		0.117713	1.26883	5.88845	-17.4384									en2645	GSE145097_2_CPT 6uM, 24 hours_MCF7_CPT 6uM, 24 hours
3	3	40.1727		0.0502463	0.878056	13.795	7.73388									en26887	GSE145097_2_CPT 6uM, 24 hours_MCF7_CPT 6uM, 24 hours
3	3	60.2591		0.398109	2.17151	1.7411	-0.673856									en26895	GSE145097_2_CPT 6uM, 24 hours_MCF7_CPT 6uM, 24 hours
3	3	70.3023		-0.14951	0.506397		8.08654									en26942	GSE145097_2_CPT 6uM, 24 hours_MCF7_CPT 6uM, 24 hours
3	3	120.518		0.00608235	1.00415	113.96	-12.3078									en27173	GSE145097_2_CPT 6uM, 24 hours_MCF7_CPT 6uM, 24 hours
3	3	70.3023		0.160914	1.39003	4.30755	-10.6074									en27207	GSE145097_2_CPT 6uM, 24 hours_MCF7_CPT 6uM, 24 hours
3	3	482.073		0.0574359	1.04572	12.0682	1.15789									en27211	GSE145097_2_CPT 6uM, 24 hours_MCF7_CPT 6uM, 24 hours
3	3	80.3455		-0.00449355	0.874466		3.69846									en2773	GSE145097_2_CPT 6uM, 24 hours_MCF7_CPT 6uM, 24 hours
3	3	40.1727		0.181323	1.26284	3.82271	6.37376									en27739	GSE145097_2_CPT 6uM, 24 hours_MCF7_CPT 6uM, 24 hours
3	3	30.1296		-0.142681	0.584803		6.01508									en2777	GSE145097_2_CPT 6uM, 24 hours_MCF7_CPT 6uM, 24 hours
3	3	40.1727		0.0370085	0.936059	18.7294	4.84016									en28226	GSE145097_2_CPT 6uM, 24 hours_MCF7_CPT 6uM, 24 hours
3	3	80.3455		0.344158	1.884	2.01404	4.08951									en28366	GSE145097_2_CPT 6uM, 24 hours_MCF7_CPT 6uM, 24 hours
3	3	60.2591		-0.0158986	0.86062		3.24589									en28970	GSE145097_2_CPT 6uM, 24 hours_MCF7_CPT 6uM, 24 hours
3	3	60.2591		-0.209411	0.427142		8.14329									en28973	GSE145097_2_CPT 6uM, 24 hours_MCF7_CPT 6uM, 24 hours
3	3	110.475		0.00434481	0.99683	159.534	-9.99553									en28977	GSE145097_2_CPT 6uM, 24 hours_MCF7_CPT 6uM, 24 hours
3	3	70.3023		-0.23151	0.377807		8.74121									en28978	GSE145097_2_CPT 6uM, 24 hours_MCF7_CPT 6uM, 24 hours
3	3	20.0864		-0.371136	0.230437		9.26236									en29036	GSE145097_2_CPT 6uM, 24 hours_MCF7_CPT 6uM, 24 hours
3	3	110.475		0.108296	1.11824	6.40048	4.14228									en29322	GSE145097_2_CPT 6uM, 24 hours_MCF7_CPT 6uM, 24 hours
3	3	50.2159		0.0987287	1.14726	7.02073	0.804086									en29323	GSE145097_2_CPT 6uM, 24 hours_MCF7_CPT 6uM, 24 hours
3	3	90.3887		-0.0604795	0.755449		4.40961									en29378	GSE145097_2_CPT 6uM, 24 hours_MCF7_CPT 6uM, 24 hours
3	3	120.518		-0.0130675	0.953686		-6.72454									en29411	GSE145097_2_CPT 6uM, 24 hours_MCF7_CPT 6uM, 24 hours
3	3	30.1296		-0.0604795	0.755449		4.40961									en29414	GSE145097_2_CPT 6uM, 24 hours_MCF7_CPT 6uM, 24 hours
3	3	20.0864		0.0370085	0.936059	18.7294	4.84016									en29416	GSE145097_2_CPT 6uM, 24 hours_MCF7_CPT 6uM, 24 hours
3	3	70.3023		0.571629	3.12823	1.21258	-9.31744									en29440	GSE145097_2_CPT 6uM, 24 hours_MCF7_CPT 6uM, 24 hours
3	3	30.1296		-0.0604795	0.755449		4.40961									en29442	GSE145097_2_CPT 6uM, 24 hours_MCF7_CPT 6uM, 24 hours
3	3	50.2159		-0.0265517	0.812143		4.63421									en2948	GSE145097_2_CPT 6uM, 24 hours_MCF7_CPT 6uM, 24 hours
3	3	30.1296		0.254387	1.70548	2.72478	-1.87751									en2964	GSE145097_2_CPT 6uM, 24 hours_MCF7_CPT 6uM, 24 hours
3	3	251.08		0.0510024	1.07048	13.5905	-3.18139									en29653	GSE145097_2_CPT 6uM, 24 hours_MCF7_CPT 6uM, 24 hours
3	3	20.0864		0.233193	1.5518	2.97242	-1.93266									en29654	GSE145097_2_CPT 6uM, 24 hours_MCF7_CPT 6uM, 24 hours
3	3	753.239		0.0473008	1.0948	14.654	-15.9179									en29660	GSE145097_2_CPT 6uM, 24 hours_MCF7_CPT 6uM, 24 hours
3	3	271.166		0.0213986	0.942257	32.3922	2.86871									en29690	GSE145097_2_CPT 6uM, 24 hours_MCF7_CPT 6uM, 24 hours
3	3	90.3887		0.227981	1.65428	3.04037	1.59279									en29696	GSE145097_2_CPT 6uM, 24 hours_MCF7_CPT 6uM, 24 hours
3	3	130.561		-0.0767852	0.799471		-0.426117									en29699	GSE145097_2_CPT 6uM, 24 hours_MCF7_CPT 6uM, 24 hours
3	3	220.95		0.145621	1.23279	4.75993	3.25685									en29701	GSE145097_2_CPT 6uM, 24 hours_MCF7_CPT 6uM, 24 hours
3	3	100.432		0.28914	1.58607	2.39728	7.50925									en29702	GSE145097_2_CPT 6uM, 24 hours_MCF7_CPT 6uM, 24 hours
3	3	80.3455		0.536003	2.88371	1.29318	-0.864698									en2971	GSE145097_2_CPT 6uM, 24 hours_MCF7_CPT 6uM, 24 hours
3	3	40.1727		0.0293012	1.00688	23.6559	-0.971915									en29734	GSE145097_2_CPT 6uM, 24 hours_MCF7_CPT 6uM, 24 hours
3	3	70.3023		0.190892	1.3099	3.63109	5.6984									en29736	GSE145097_2_CPT 6uM, 24 hours_MCF7_CPT 6uM, 24 hours
3	3	30.1296		0.202326	1.36925	3.4259	4.65732									en29739	GSE145097_2_CPT 6uM, 24 hours_MCF7_CPT 6uM, 24 hours
3	3	50.2159		-0.0324926	0.731092		7.12202									en29745	GSE145097_2_CPT 6uM, 24 hours_MCF7_CPT 6uM, 24 hours
3	3	682.937		0.0329178	1.02208	21.0569	-1.87697									en29803	GSE145097_2_CPT 6uM, 24 hours_MCF7_CPT 6uM, 24 hours
3	3	210.907		0.0905881	1.07489	7.65164	4.12114									en29804	GSE145097_2_CPT 6uM, 24 hours_MCF7_CPT 6uM, 24 hours
3	3	70.3023		-0.148062	0.587813		5.61642									en29820	GSE145097_2_CPT 6uM, 24 hours_MCF7_CPT 6uM, 24 hours
3	3	120.518		0.093805	1.22395	7.38923	-7.57885									en29880	GSE145097_2_CPT 6uM, 24 hours_MCF7_CPT 6uM, 24 hours
3	3	20.0864		0.0370085	0.936059	18.7294	4.84016									en29881	GSE145097_2_CPT 6uM, 24 hours_MCF7_CPT 6uM, 24 hours
3	3	261.123		0.40506	2.21139	1.71122	-1.92406									en29883	GSE145097_2_CPT 6uM, 24 hours_MCF7_CPT 6uM, 24 hours
3	3	80.3455		0.138807	1.33202	4.99359	-9.76859									en29966	GSE145097_2_CPT 6uM, 24 hours_MCF7_CPT 6uM, 24 hours
3	3	180.777		0.12425	1.22942	5.57866	-0.944067									en29993	GSE145097_2_CPT 6uM, 24 hours_MCF7_CPT 6uM, 24 hours
3	3	50.2159		0.246784	1.64676	2.80872	-11.4508									en30103	GSE145097_2_CPT 6uM, 24 hours_MCF7_CPT 6uM, 24 hours
3	3	40.1727		-0.672079	0.0469501		10.7594									en30132	GSE145097_2_CPT 6uM, 24 hours_MCF7_CPT 6uM, 24 hours
3	3	50.2159		-0.183332	0.494111		7.17311									en30162	GSE145097_2_CPT 6uM, 24 hours_MCF7_CPT 6uM, 24 hours
3	3	40.1727		-0.157749	0.443802		9.27368									en30253	GSE145097_2_CPT 6uM, 24 hours_MCF7_CPT 6uM, 24 hours
3	3	662.85		-0.0841361	0.768873		1.2073									en30257	GSE145097_2_CPT 6uM, 24 hours_MCF7_CPT 6uM, 24 hours
3	3	40.1727		0.0502463	0.878056	13.795	7.73388									en30319	GSE145097_2_CPT 6uM, 24 hours_MCF7_CPT 6uM, 24 hours
3	3	50.2159		0.169825	1.37209	4.08154	-3.75941									en30326	GSE145097_2_CPT 6uM, 24 hours_MCF7_CPT 6uM, 24 hours
3	3	70.3023		-0.0461397	0.803928		3.25193									en30328	GSE145097_2_CPT 6uM, 24 hours_MCF7_CPT 6uM, 24 hours
3	3	100.432		-0.100014	0.589363		7.83799									en30332	GSE145097_2_CPT 6uM, 24 hours_MCF7_CPT 6uM, 24 hours
3	3	80.3455		-0.0960155	0.703282		4.04437									en30334	GSE145097_2_CPT 6uM, 24 hours_MCF7_CPT 6uM, 24 hours
3	3	30.1296		0.136047	1.28914	5.0949	-5.74566									en30335	GSE145097_2_CPT 6uM, 24 hours_MCF7_CPT 6uM, 24 hours
3	3	70.3023		0.469904	2.51755	1.47508	-0.699105									en30384	GSE145097_2_CPT 6uM, 24 hours_MCF7_CPT 6uM, 24 hours
3	3	70.3023		0.115017	1.24212	6.02647	-7.91962									en30580	GSE145097_2_CPT 6uM, 24 hours_MCF7_CPT 6uM, 24 hours
3	3	532.289		0.0287371	1.01393	24.1203	-1.97706									en30620	GSE145097_2_CPT 6uM, 24 hours_MCF7_CPT 6uM, 24 hours
3	3	60.2591		-0.142214	0.492633		8.66809									en30820	GSE145097_2_CPT 6uM, 24 hours_MCF7_CPT 6uM, 24 hours
3	3	60.2591		-0.292777	0.313713		8.79068									en30872	GSE145097_2_CPT 6uM, 24 hours_MCF7_CPT 6uM, 24 hours
3	3	150.648		0.0281305	1.02189	24.6404	-3.34803									en309	GSE145097_2_CPT 6uM, 24 hours_MCF7_CPT 6uM, 24 hours
3	3	50.2159		0.216176	1.44654	3.20641	2.80115									en30905	GSE145097_2_CPT 6uM, 24 hours_MCF7_CPT 6uM, 24 hours
3	3	40.1727		0.100654	1.21211	6.88641	-10.4425									en30908	GSE145097_2_CPT 6uM, 24 hours_MCF7_CPT 6uM, 24 hours
3	3	291.252		0.0230843	0.930994	30.0268	3.68558									en30953	GSE145097_2_CPT 6uM, 24 hours_MCF7_CPT 6uM, 24 hours
3	3	130.561		0.0824846	1.22446	8.40335	-1.94466									en3115	GSE145097_2_CPT 6uM, 24 hours_MCF7_CPT 6uM, 24 hours
3	3	130.561		-0.0651214	0.679607		6.91836									en31560	GSE145097_2_CPT 6uM, 24 hours_MCF7_CPT 6uM, 24 hours
3	3	20.0864		-0.119114	0.582147		7.22356									en31565	GSE145097_2_CPT 6uM, 24 hours_MCF7_CPT 6uM, 24 hours
3	3	110.475		0.0298662	1.00014	23.2084	-0.140502									en31585	GSE145097_2_CPT 6uM, 24 hours_MCF7_CPT 6uM, 24 hours
3	3	40.1727		0.0293012	1.00688	23.6559	-0.971915									en3159	GSE145097_2_CPT 6uM, 24 hours_MCF7_CPT 6uM, 24 hours
3	3	40.1727		0.100654	1.21211	6.88641	-10.4425									en31769	GSE145097_2_CPT 6uM, 24 hours_MCF7_CPT 6uM, 24 hours
3	3	40.1727		0.181323	1.26284	3.82271	6.37376									en31949	GSE145097_2_CPT 6uM, 24 hours_MCF7_CPT 6uM, 24 hours
3	3	70.3023		0.183624	1.52788	3.77483	2.00978									en3212	GSE145097_2_CPT 6uM, 24 hours_MCF7_CPT 6uM, 24 hours
3	3	50.2159		0.471564	2.48475	1.46989	3.4258									en32278	GSE145097_2_CPT 6uM, 24 hours_MCF7_CPT 6uM, 24 hours
3	3	70.3023		-0.166743	0.515071		7.19916									en32470	GSE145097_2_CPT 6uM, 24 hours_MCF7_CPT 6uM, 24 hours
3	3	150.648		0.0129328	0.909712	53.5959	3.6947									en32650	GSE145097_2_CPT 6uM, 24 hours_MCF7_CPT 6uM, 24 hours
3	3	60.2591		0.233193	1.5518	2.97242	-1.93266									en32700	GSE145097_2_CPT 6uM, 24 hours_MCF7_CPT 6uM, 24 hours
3	3	130.561		0.117256	1.08626	5.91141	6.34817									en32705	GSE145097_2_CPT 6uM, 24 hours_MCF7_CPT 6uM, 24 hours
3	3	241.036		0.0695735	1.0085	9.9628	4.86917									en32854	GSE145097_2_CPT 6uM, 24 hours_MCF7_CPT 6uM, 24 hours
3	3	20.0864		0.233193	1.5518	2.97242	-1.93266									en32911	GSE145097_2_CPT 6uM, 24 hours_MCF7_CPT 6uM, 24 hours
3	3	110.475		-0.0369454	0.890528		-2.97838									en330	GSE145097_2_CPT 6uM, 24 hours_MCF7_CPT 6uM, 24 hours
3	3	120.518		0.125904	1.29065	5.50537	-15.9787									en33134	GSE145097_2_CPT 6uM, 24 hours_MCF7_CPT 6uM, 24 hours
3	3	90.3887		-0.000480546	0.860187		4.74699									en33135	GSE145097_2_CPT 6uM, 24 hours_MCF7_CPT 6uM, 24 hours
3	3	100.432		-0.0265517	0.812143		4.63421									en33154	GSE145097_2_CPT 6uM, 24 hours_MCF7_CPT 6uM, 24 hours
3	3	411.771		0.118213	1.21995	5.86352	-1.671									en33161	GSE145097_2_CPT 6uM, 24 hours_MCF7_CPT 6uM, 24 hours
3	3	40.1727		-0.0449166	0.736323		6.2453									en33162	GSE145097_2_CPT 6uM, 24 hours_MCF7_CPT 6uM, 24 hours
3	3	80.3455		-0.00366328	0.96373		-4.65587									en33163	GSE145097_2_CPT 6uM, 24 hours_MCF7_CPT 6uM, 24 hours
3	3	140.605		-0.0108888	0.815445		5.71042									en33165	GSE145097_2_CPT 6uM, 24 hours_MCF7_CPT 6uM, 24 hours
3	3	70.3023		-0.14951	0.506397		8.08654									en33166	GSE145097_2_CPT 6uM, 24 hours_MCF7_CPT 6uM, 24 hours
3	3	120.518		0.134612	1.11499	5.14923	6.89718									en33179	GSE145097_2_CPT 6uM, 24 hours_MCF7_CPT 6uM, 24 hours
3	3	90.3887		0.23994	1.74839	2.88884	4.92624									en33181	GSE145097_2_CPT 6uM, 24 hours_MCF7_CPT 6uM, 24 hours
3	3	461.987		0.0469131	1.11589	14.7751	-7.65409									en33184	GSE145097_2_CPT 6uM, 24 hours_MCF7_CPT 6uM, 24 hours
3	3	40.1727		-0.0449166	0.736323		6.2453									en333	GSE145097_2_CPT 6uM, 24 hours_MCF7_CPT 6uM, 24 hours
3	3	20.0864		0.233193	1.5518	2.97242	-1.93266									en33386	GSE145097_2_CPT 6uM, 24 hours_MCF7_CPT 6uM, 24 hours
3	3	30.1296		0.398109	2.17151	1.7411	-0.673856									en33539	GSE145097_2_CPT 6uM, 24 hours_MCF7_CPT 6uM, 24 hours
3	3	401.727		0.108151	1.23509	6.40907	-13.6385									en337	GSE145097_2_CPT 6uM, 24 hours_MCF7_CPT 6uM, 24 hours
3	3	40.1727		0.536003	2.88371	1.29318	-0.864698									en33722	GSE145097_2_CPT 6uM, 24 hours_MCF7_CPT 6uM, 24 hours
3	3	1255.4		0.0126609	1.0145	54.7472	-10.3836									en338	GSE145097_2_CPT 6uM, 24 hours_MCF7_CPT 6uM, 24 hours
3	3	60.2591		-0.0158986	0.86062		3.24589									en33871	GSE145097_2_CPT 6uM, 24 hours_MCF7_CPT 6uM, 24 hours
3	3	60.2591		0.398109	2.17151	1.7411	-0.673856									en33880	GSE145097_2_CPT 6uM, 24 hours_MCF7_CPT 6uM, 24 hours
3	3	100.432		0.169825	1.37209	4.08154	-3.75941									en3408	GSE145097_2_CPT 6uM, 24 hours_MCF7_CPT 6uM, 24 hours
3	3	50.2159		0.430956	2.36687	1.60839	-24.6169									en3410	GSE145097_2_CPT 6uM, 24 hours_MCF7_CPT 6uM, 24 hours
3	3	271.166		0.0713677	1.1214	9.71234	-4.01284									en3413	GSE145097_2_CPT 6uM, 24 hours_MCF7_CPT 6uM, 24 hours
3	3	461.987		0.0901236	1.18452	7.69107	-9.40155									en3421	GSE145097_2_CPT 6uM, 24 hours_MCF7_CPT 6uM, 24 hours
3	3	70.3023		0.156054	1.25537	4.44171	3.59464									en3422	GSE145097_2_CPT 6uM, 24 hours_MCF7_CPT 6uM, 24 hours
3	3	170.734		-0.187137	0.379475		9.8133									en3426	GSE145097_2_CPT 6uM, 24 hours_MCF7_CPT 6uM, 24 hours
3	3	50.2159		0.0413637	0.910646	16.7574	6.1695									en343	GSE145097_2_CPT 6uM, 24 hours_MCF7_CPT 6uM, 24 hours
3	3	160.691		-0.187106	0.510137		6.50683									en344	GSE145097_2_CPT 6uM, 24 hours_MCF7_CPT 6uM, 24 hours
3	3	30.1296		0.202326	1.36925	3.4259	4.65732									en3443	GSE145097_2_CPT 6uM, 24 hours_MCF7_CPT 6uM, 24 hours
3	3	80.3455		0.628262	3.43957	1.10328	3.96104									en345	GSE145097_2_CPT 6uM, 24 hours_MCF7_CPT 6uM, 24 hours
3	3	261.123		0.239064	1.53961	2.89942	1.38168									en34533	GSE145097_2_CPT 6uM, 24 hours_MCF7_CPT 6uM, 24 hours
3	3	70.3023		-0.0117412	0.788759		6.56735									en34534	GSE145097_2_CPT 6uM, 24 hours_MCF7_CPT 6uM, 24 hours
3	3	361.555		0.0191176	0.869766	36.257	5.93638									en34535	GSE145097_2_CPT 6uM, 24 hours_MCF7_CPT 6uM, 24 hours
3	3	351.511		0.263716	1.68634	2.62839	-11.6494									en34537	GSE145097_2_CPT 6uM, 24 hours_MCF7_CPT 6uM, 24 hours
3	3	2942.65		0.0209907	1.04139	33.0217	-22.4836									en34538	GSE145097_2_CPT 6uM, 24 hours_MCF7_CPT 6uM, 24 hours
3	3	331.425		0.0373725	1.03167	18.547	-1.87885									en34542	GSE145097_2_CPT 6uM, 24 hours_MCF7_CPT 6uM, 24 hours
3	3	60.2591		0.0971113	1.10319	7.13766	3.48887									en34549	GSE145097_2_CPT 6uM, 24 hours_MCF7_CPT 6uM, 24 hours
3	3	251.08		0.0789753	1.12021	8.77675	-1.22462									en34551	GSE145097_2_CPT 6uM, 24 hours_MCF7_CPT 6uM, 24 hours
3	3	170.734		0.137052	1.18839	5.05754	4.36003									en346	GSE145097_2_CPT 6uM, 24 hours_MCF7_CPT 6uM, 24 hours
3	3	401.727		0.171056	1.50216	4.05216	2.65591									en348	GSE145097_2_CPT 6uM, 24 hours_MCF7_CPT 6uM, 24 hours
3	3	30.1296		0.136047	1.28914	5.0949	-5.74566									en34842	GSE145097_2_CPT 6uM, 24 hours_MCF7_CPT 6uM, 24 hours
3	3	30.1296		0.136047	1.28914	5.0949	-5.74566									en35058	GSE145097_2_CPT 6uM, 24 hours_MCF7_CPT 6uM, 24 hours
3	3	60.2591		-0.209411	0.427142		8.14329									en35467	GSE145097_2_CPT 6uM, 24 hours_MCF7_CPT 6uM, 24 hours
3	3	40.1727		0.17861	1.46509	3.8808	-3.14123									en35490	GSE145097_2_CPT 6uM, 24 hours_MCF7_CPT 6uM, 24 hours
3	3	40.1727		0.0370085	0.936059	18.7294	4.84016									en35521	GSE145097_2_CPT 6uM, 24 hours_MCF7_CPT 6uM, 24 hours
3	3	60.2591		0.136047	1.28914	5.0949	-5.74566									en35564	GSE145097_2_CPT 6uM, 24 hours_MCF7_CPT 6uM, 24 hours
3	3	120.518		0.0314863	0.982405	22.0143	1.63799									en35605	GSE145097_2_CPT 6uM, 24 hours_MCF7_CPT 6uM, 24 hours
3	3	2601.19		-0.00370766	0.914298		1.31096									en35606	GSE145097_2_CPT 6uM, 24 hours_MCF7_CPT 6uM, 24 hours
3	3	70.3023		0.571629	3.12823	1.21258	-9.31744									en36081	GSE145097_2_CPT 6uM, 24 hours_MCF7_CPT 6uM, 24 hours
3	3	50.2159		0.0541303	0.869411	12.8052	8.17583									en36082	GSE145097_2_CPT 6uM, 24 hours_MCF7_CPT 6uM, 24 hours
3	3	70.3023		0.221451	1.47782	3.13002	1.78559									en36092	GSE145097_2_CPT 6uM, 24 hours_MCF7_CPT 6uM, 24 hours
3	3	30.1296		-0.301346	0.27073		9.60616									en36093	GSE145097_2_CPT 6uM, 24 hours_MCF7_CPT 6uM, 24 hours
3	3	60.2591		0.0971113	1.10319	7.13766	3.48887									en36238	GSE145097_2_CPT 6uM, 24 hours_MCF7_CPT 6uM, 24 hours
3	3	60.2591		0.162399	1.30567	4.26817	1.50417									en36239	GSE145097_2_CPT 6uM, 24 hours_MCF7_CPT 6uM, 24 hours
3	3	110.475		0.10138	1.2412	6.83714	-7.97826									en36240	GSE145097_2_CPT 6uM, 24 hours_MCF7_CPT 6uM, 24 hours
3	3	50.2159		0.653457	3.66564	1.06074	-1.37631									en36241	GSE145097_2_CPT 6uM, 24 hours_MCF7_CPT 6uM, 24 hours
3	3	100.432		0.278153	1.72378	2.49196	-6.13104									en36242	GSE145097_2_CPT 6uM, 24 hours_MCF7_CPT 6uM, 24 hours
3	3	582.505		0.13434	1.26499	5.15963	-2.10743									en36244	GSE145097_2_CPT 6uM, 24 hours_MCF7_CPT 6uM, 24 hours
3	3	130.561		0.0630737	1.16653	10.9895	-4.01252									en36245	GSE145097_2_CPT 6uM, 24 hours_MCF7_CPT 6uM, 24 hours
3	3	50.2159		0.319704	1.84838	2.16809	-0.941681									en36247	GSE145097_2_CPT 6uM, 24 hours_MCF7_CPT 6uM, 24 hours
3	3	30.1296		0.398109	2.17151	1.7411	-0.673856									en36252	GSE145097_2_CPT 6uM, 24 hours_MCF7_CPT 6uM, 24 hours
3	3	291.252		0.177258	1.44952	3.91038	-5.52689									en36254	GSE145097_2_CPT 6uM, 24 hours_MCF7_CPT 6uM, 24 hours
3	3	30.1296		0.398109	2.17151	1.7411	-0.673856									en36256	GSE145097_2_CPT 6uM, 24 hours_MCF7_CPT 6uM, 24 hours
3	3	733.153		0.0418584	1.06782	16.5593	-7.01758									en36595	GSE145097_2_CPT 6uM, 24 hours_MCF7_CPT 6uM, 24 hours
3	3	170.734		0.101831	1.03586	6.80681	6.71228									en36599	GSE145097_2_CPT 6uM, 24 hours_MCF7_CPT 6uM, 24 hours
3	3	210.907		0.295036	1.65068	2.34936	6.04034									en36602	GSE145097_2_CPT 6uM, 24 hours_MCF7_CPT 6uM, 24 hours
3	3	100.432		-0.0243284	0.851339		2.852									en36607	GSE145097_2_CPT 6uM, 24 hours_MCF7_CPT 6uM, 24 hours
3	3	30.1296		-0.0604795	0.755449		4.40961									en36689	GSE145097_2_CPT 6uM, 24 hours_MCF7_CPT 6uM, 24 hours
3	3	100.432		-0.0365924	0.688586		8.06217									en36719	GSE145097_2_CPT 6uM, 24 hours_MCF7_CPT 6uM, 24 hours
3	3	30.1296		-0.0842688	0.599935		8.21007									en36720	GSE145097_2_CPT 6uM, 24 hours_MCF7_CPT 6uM, 24 hours
3	3	210.907		0.059964	1.06066	11.5594	0.38115									en36744	GSE145097_2_CPT 6uM, 24 hours_MCF7_CPT 6uM, 24 hours
3	3	60.2591		-0.177495	0.391083		9.81984									en36747	GSE145097_2_CPT 6uM, 24 hours_MCF7_CPT 6uM, 24 hours
3	3	150.648		0.0779767	1.18914	8.88916	-6.72									en36748	GSE145097_2_CPT 6uM, 24 hours_MCF7_CPT 6uM, 24 hours
3	3	20.0864		0.0370085	0.936059	18.7294	4.84016									en36754	GSE145097_2_CPT 6uM, 24 hours_MCF7_CPT 6uM, 24 hours
3	3	70.3023		0.302948	1.85694	2.288	-5.0428									en3705	GSE145097_2_CPT 6uM, 24 hours_MCF7_CPT 6uM, 24 hours
3	3	50.2159		0.202035	1.56887	3.43083	1.04608									en37117	GSE145097_2_CPT 6uM, 24 hours_MCF7_CPT 6uM, 24 hours
3	3	80.3455		0.113071	1.20048	6.13018	-0.89805									en3725	GSE145097_2_CPT 6uM, 24 hours_MCF7_CPT 6uM, 24 hours
3	3	90.3887		-0.0744771	0.654466		7.19131									en37265	GSE145097_2_CPT 6uM, 24 hours_MCF7_CPT 6uM, 24 hours
3	3	50.2159		0.0987287	1.14726	7.02073	0.804086									en37293	GSE145097_2_CPT 6uM, 24 hours_MCF7_CPT 6uM, 24 hours
3	3	20.0864		-0.119114	0.582147		7.22356									en37294	GSE145097_2_CPT 6uM, 24 hours_MCF7_CPT 6uM, 24 hours
3	3	50.2159		-0.162846	0.475889		8.39391									en37295	GSE145097_2_CPT 6uM, 24 hours_MCF7_CPT 6uM, 24 hours
3	3	90.3887		-0.000394716	0.938244		-0.191464									en37304	GSE145097_2_CPT 6uM, 24 hours_MCF7_CPT 6uM, 24 hours
3	3	50.2159		0.169825	1.37209	4.08154	-3.75941									en37403	GSE145097_2_CPT 6uM, 24 hours_MCF7_CPT 6uM, 24 hours
3	3	80.3455		0.306197	1.95232	2.26373	3.95758									en3748	GSE145097_2_CPT 6uM, 24 hours_MCF7_CPT 6uM, 24 hours
3	3	150.648		0.01089	0.975593	63.65	-1.82546									en3750	GSE145097_2_CPT 6uM, 24 hours_MCF7_CPT 6uM, 24 hours
3	3	70.3023		-0.0117412	0.788759		6.56735									en3751	GSE145097_2_CPT 6uM, 24 hours_MCF7_CPT 6uM, 24 hours
3	3	60.2591		0.254387	1.70548	2.72478	-1.87751									en37542	GSE145097_2_CPT 6uM, 24 hours_MCF7_CPT 6uM, 24 hours
3	3	60.2591		0.136047	1.28914	5.0949	-5.74566									en3761	GSE145097_2_CPT 6uM, 24 hours_MCF7_CPT 6uM, 24 hours
3	3	70.3023		-0.115516	0.651863		4.9819									en3762	GSE145097_2_CPT 6uM, 24 hours_MCF7_CPT 6uM, 24 hours
3	3	301.296		-0.0138919	0.92289		-1.41482									en3767	GSE145097_2_CPT 6uM, 24 hours_MCF7_CPT 6uM, 24 hours
3	3	30.1296		-0.142681	0.584803		6.01508									en37898	GSE145097_2_CPT 6uM, 24 hours_MCF7_CPT 6uM, 24 hours
3	3	30.1296		0.398109	2.17151	1.7411	-0.673856									en37970	GSE145097_2_CPT 6uM, 24 hours_MCF7_CPT 6uM, 24 hours
3	3	100.432		0.207612	1.50267	3.33867	-9.58033									en38059	GSE145097_2_CPT 6uM, 24 hours_MCF7_CPT 6uM, 24 hours
3	3	30.1296		0.0448882	0.895156	15.4416	6.91569									en3811	GSE145097_2_CPT 6uM, 24 hours_MCF7_CPT 6uM, 24 hours
3	3	241.036		-0.0148276	0.891883		1.35718									en38110	GSE145097_2_CPT 6uM, 24 hours_MCF7_CPT 6uM, 24 hours
3	3	120.518		0.210875	1.32684	3.28701	7.22502									en3813	GSE145097_2_CPT 6uM, 24 hours_MCF7_CPT 6uM, 24 hours
3	3	50.2159		0.328398	1.97812	2.11069	-0.580319									en38158	GSE145097_2_CPT 6uM, 24 hours_MCF7_CPT 6uM, 24 hours
3	3	20.0864		-0.119114	0.582147		7.22356									en38167	GSE145097_2_CPT 6uM, 24 hours_MCF7_CPT 6uM, 24 hours
3	3	60.2591		0.308994	1.84938	2.24324	-13.537									en38168	GSE145097_2_CPT 6uM, 24 hours_MCF7_CPT 6uM, 24 hours
3	3	70.3023		0.27539	1.61623	2.51697	4.39477									en3818	GSE145097_2_CPT 6uM, 24 hours_MCF7_CPT 6uM, 24 hours
3	3	30.1296		0.136047	1.28914	5.0949	-5.74566									en3825	GSE145097_2_CPT 6uM, 24 hours_MCF7_CPT 6uM, 24 hours
3	3	492.116		0.131906	1.30357	5.25484	-21.5691									en3827	GSE145097_2_CPT 6uM, 24 hours_MCF7_CPT 6uM, 24 hours
3	3	70.3023		0.571629	3.12823	1.21258	-9.31744									en38346	GSE145097_2_CPT 6uM, 24 hours_MCF7_CPT 6uM, 24 hours
3	3	20.0864		-0.119114	0.582147		7.22356									en38427	GSE145097_2_CPT 6uM, 24 hours_MCF7_CPT 6uM, 24 hours
3	3	110.475		0.00541393	0.90341	128.03	3.2104									en38429	GSE145097_2_CPT 6uM, 24 hours_MCF7_CPT 6uM, 24 hours
3	3	30.1296		0.398109	2.17151	1.7411	-0.673856									en38469	GSE145097_2_CPT 6uM, 24 hours_MCF7_CPT 6uM, 24 hours
3	3	30.1296		-0.0604795	0.755449		4.40961									en38473	GSE145097_2_CPT 6uM, 24 hours_MCF7_CPT 6uM, 24 hours
3	3	30.1296		-0.287115	0.354574		7.84559									en38479	GSE145097_2_CPT 6uM, 24 hours_MCF7_CPT 6uM, 24 hours
3	3	70.3023		-0.300652	0.318462		8.48612									en38480	GSE145097_2_CPT 6uM, 24 hours_MCF7_CPT 6uM, 24 hours
3	3	120.518		-0.0337149	0.873239		-0.124891									en38658	GSE145097_2_CPT 6uM, 24 hours_MCF7_CPT 6uM, 24 hours
3	3	20.0864		-0.371136	0.230437		9.26236									en38660	GSE145097_2_CPT 6uM, 24 hours_MCF7_CPT 6uM, 24 hours
3	3	170.734		0.01641	0.893378	42.2394	4.79794									en38665	GSE145097_2_CPT 6uM, 24 hours_MCF7_CPT 6uM, 24 hours
3	3	150.648		-0.0282768	0.785575		5.58289									en38666	GSE145097_2_CPT 6uM, 24 hours_MCF7_CPT 6uM, 24 hours
3	3	20.0864		-0.582752	0.0935249		10.0835									en38667	GSE145097_2_CPT 6uM, 24 hours_MCF7_CPT 6uM, 24 hours
3	3	461.987		0.0477332	1.05354	14.5213	-1.78147									en38669	GSE145097_2_CPT 6uM, 24 hours_MCF7_CPT 6uM, 24 hours
3	3	291.252		-0.0605291	0.773794		3.49691									en38673	GSE145097_2_CPT 6uM, 24 hours_MCF7_CPT 6uM, 24 hours
3	3	120.518		-0.142821	0.631016		4.06038									en38676	GSE145097_2_CPT 6uM, 24 hours_MCF7_CPT 6uM, 24 hours
3	3	40.1727		0.0370085	0.936059	18.7294	4.84016									en38678	GSE145097_2_CPT 6uM, 24 hours_MCF7_CPT 6uM, 24 hours
3	3	40.1727		0.233193	1.5518	2.97242	-1.93266									en38679	GSE145097_2_CPT 6uM, 24 hours_MCF7_CPT 6uM, 24 hours
3	3	60.2591		0.0820392	1.12401	8.44898	-0.832442									en38864	GSE145097_2_CPT 6uM, 24 hours_MCF7_CPT 6uM, 24 hours
3	3	30.1296		-0.58737	0.0775864		10.4719									en38874	GSE145097_2_CPT 6uM, 24 hours_MCF7_CPT 6uM, 24 hours
3	3	120.518		0.1086	1.20339	6.38259	-2.7461									en38885	GSE145097_2_CPT 6uM, 24 hours_MCF7_CPT 6uM, 24 hours
3	3	50.2159		0.471564	2.48475	1.46989	3.4258									en3909	GSE145097_2_CPT 6uM, 24 hours_MCF7_CPT 6uM, 24 hours
3	3	30.1296		0.254387	1.70548	2.72478	-1.87751									en3914	GSE145097_2_CPT 6uM, 24 hours_MCF7_CPT 6uM, 24 hours
3	3	50.2159		-0.162846	0.475889		8.39391									en3918	GSE145097_2_CPT 6uM, 24 hours_MCF7_CPT 6uM, 24 hours
3	3	30.1296		-0.301346	0.27073		9.60616									en3919	GSE145097_2_CPT 6uM, 24 hours_MCF7_CPT 6uM, 24 hours
3	3	50.2159		-0.0418791	0.644051		8.87442									en3924	GSE145097_2_CPT 6uM, 24 hours_MCF7_CPT 6uM, 24 hours
3	3	40.1727		-0.24886	0.31422		9.73643									en39360	GSE145097_2_CPT 6uM, 24 hours_MCF7_CPT 6uM, 24 hours
3	3	70.3023		0.226937	1.68511	3.05435	3.79945									en39477	GSE145097_2_CPT 6uM, 24 hours_MCF7_CPT 6uM, 24 hours
3	3	40.1727		0.233193	1.5518	2.97242	-1.93266									en40236	GSE145097_2_CPT 6uM, 24 hours_MCF7_CPT 6uM, 24 hours
3	3	20.0864		0.0370085	0.936059	18.7294	4.84016									en40551	GSE145097_2_CPT 6uM, 24 hours_MCF7_CPT 6uM, 24 hours
3	3	110.475		-0.0948743	0.754054		0.970569									en40584	GSE145097_2_CPT 6uM, 24 hours_MCF7_CPT 6uM, 24 hours
3	3	662.85		0.115997	1.22612	5.97556	-3.41511									en40585	GSE145097_2_CPT 6uM, 24 hours_MCF7_CPT 6uM, 24 hours
3	3	210.907		0.184329	1.48995	3.76038	-1.85519									en40588	GSE145097_2_CPT 6uM, 24 hours_MCF7_CPT 6uM, 24 hours
3	3	241.036		0.0563454	1.05051	12.3018	0.557421									en40589	GSE145097_2_CPT 6uM, 24 hours_MCF7_CPT 6uM, 24 hours
3	3	311.339		0.0956205	1.2316	7.24894	-6.5559									en40590	GSE145097_2_CPT 6uM, 24 hours_MCF7_CPT 6uM, 24 hours
3	3	20.0864		-0.371136	0.230437		9.26236									en40875	GSE145097_2_CPT 6uM, 24 hours_MCF7_CPT 6uM, 24 hours
3	3	90.3887		-0.340034	0.270879		8.84197									en41101	GSE145097_2_CPT 6uM, 24 hours_MCF7_CPT 6uM, 24 hours
3	3	20.0864		0.233193	1.5518	2.97242	-1.93266									en41112	GSE145097_2_CPT 6uM, 24 hours_MCF7_CPT 6uM, 24 hours
3	3	120.518		-0.0765146	0.745905		3.51505									en41120	GSE145097_2_CPT 6uM, 24 hours_MCF7_CPT 6uM, 24 hours
3	3	2420.41		0.0396073	1.05988	17.5005	-6.14526									en41121	GSE145097_2_CPT 6uM, 24 hours_MCF7_CPT 6uM, 24 hours
3	3	3675.81		0.0396676	1.03671	17.4739	-1.88806									en41123	GSE145097_2_CPT 6uM, 24 hours_MCF7_CPT 6uM, 24 hours
3	3	50.2159		0.123586	1.1423	5.60864	4.8364									en41148	GSE145097_2_CPT 6uM, 24 hours_MCF7_CPT 6uM, 24 hours
3	3	50.2159		0.653457	3.66564	1.06074	-1.37631									en41151	GSE145097_2_CPT 6uM, 24 hours_MCF7_CPT 6uM, 24 hours
3	3	70.3023		0.115017	1.24212	6.02647	-7.91962									en41196	GSE145097_2_CPT 6uM, 24 hours_MCF7_CPT 6uM, 24 hours
3	3	30.1296		0.0448882	0.895156	15.4416	6.91569									en416	GSE145097_2_CPT 6uM, 24 hours_MCF7_CPT 6uM, 24 hours
3	3	140.605		0.0400173	0.917669	17.3212	5.81883									en41682	GSE145097_2_CPT 6uM, 24 hours_MCF7_CPT 6uM, 24 hours
3	3	70.3023		-0.0139241	0.734474		7.98333									en42015	GSE145097_2_CPT 6uM, 24 hours_MCF7_CPT 6uM, 24 hours
3	3	140.605		-0.00843546	0.920365		-0.00305536									en42108	GSE145097_2_CPT 6uM, 24 hours_MCF7_CPT 6uM, 24 hours
3	3	251.08		0.120138	1.32463	5.76961	-0.912579									en42109	GSE145097_2_CPT 6uM, 24 hours_MCF7_CPT 6uM, 24 hours
3	3	70.3023		0.11552	1.07234	6.00026	6.65806									en42110	GSE145097_2_CPT 6uM, 24 hours_MCF7_CPT 6uM, 24 hours
3	3	20.0864		-0.119114	0.582147		7.22356									en42207	GSE145097_2_CPT 6uM, 24 hours_MCF7_CPT 6uM, 24 hours
3	3	90.3887		0.390843	2.18954	1.77346	-14.7803									en42209	GSE145097_2_CPT 6uM, 24 hours_MCF7_CPT 6uM, 24 hours
3	3	150.648		0.190624	1.55665	3.6362	2.60281									en42233	GSE145097_2_CPT 6uM, 24 hours_MCF7_CPT 6uM, 24 hours
3	3	461.987		-0.0644573	0.811264		0.477781									en42234	GSE145097_2_CPT 6uM, 24 hours_MCF7_CPT 6uM, 24 hours
3	3	60.2591		0.193593	1.48177	3.58044	-11.4108									en42292	GSE145097_2_CPT 6uM, 24 hours_MCF7_CPT 6uM, 24 hours
3	3	60.2591		0.0820392	1.12401	8.44898	-0.832442									en42295	GSE145097_2_CPT 6uM, 24 hours_MCF7_CPT 6uM, 24 hours
3	3	60.2591		0.388095	2.20282	1.78602	-3.3232									en42464	GSE145097_2_CPT 6uM, 24 hours_MCF7_CPT 6uM, 24 hours
3	3	70.3023		-0.32025	0.241861		9.882									en42492	GSE145097_2_CPT 6uM, 24 hours_MCF7_CPT 6uM, 24 hours
3	3	20.0864		-0.119114	0.582147		7.22356									en42560	GSE145097_2_CPT 6uM, 24 hours_MCF7_CPT 6uM, 24 hours
3	3	622.678		-0.00959087	0.891113		2.13862									en42810	GSE145097_2_CPT 6uM, 24 hours_MCF7_CPT 6uM, 24 hours
3	3	200.864		0.0547436	1.09604	12.6617	-6.95561									en42812	GSE145097_2_CPT 6uM, 24 hours_MCF7_CPT 6uM, 24 hours
3	3	30.1296		0.254387	1.70548	2.72478	-1.87751									en42814	GSE145097_2_CPT 6uM, 24 hours_MCF7_CPT 6uM, 24 hours
3	3	100.432		0.324627	1.91556	2.13521	-21.7971									en42815	GSE145097_2_CPT 6uM, 24 hours_MCF7_CPT 6uM, 24 hours
3	3	1908.21		0.0584523	1.12249	11.8583	-22.3177									en42817	GSE145097_2_CPT 6uM, 24 hours_MCF7_CPT 6uM, 24 hours
3	3	20.0864		0.233193	1.5518	2.97242	-1.93266									en42823	GSE145097_2_CPT 6uM, 24 hours_MCF7_CPT 6uM, 24 hours
3	3	30.1296		-0.0604795	0.755449		4.40961									en42874	GSE145097_2_CPT 6uM, 24 hours_MCF7_CPT 6uM, 24 hours
3	3	482.073		0.0714109	1.1171	9.70646	-3.24093									en42923	GSE145097_2_CPT 6uM, 24 hours_MCF7_CPT 6uM, 24 hours
3	3	20.0864		0.233193	1.5518	2.97242	-1.93266									en43066	GSE145097_2_CPT 6uM, 24 hours_MCF7_CPT 6uM, 24 hours
3	3	50.2159		-0.286639	0.259869		10.1003									en43310	GSE145097_2_CPT 6uM, 24 hours_MCF7_CPT 6uM, 24 hours
3	3	40.1727		-0.24886	0.31422		9.73643									en43313	GSE145097_2_CPT 6uM, 24 hours_MCF7_CPT 6uM, 24 hours
3	3	60.2591		-0.252969	0.401376		7.49418									en43343	GSE145097_2_CPT 6uM, 24 hours_MCF7_CPT 6uM, 24 hours
3	3	60.2591		0.162399	1.30567	4.26817	1.50417									en43390	GSE145097_2_CPT 6uM, 24 hours_MCF7_CPT 6uM, 24 hours
3	3	140.605		1.15775	10.1183	0.5987	-1.43818									en43391	GSE145097_2_CPT 6uM, 24 hours_MCF7_CPT 6uM, 24 hours
3	3	1104.75		0.0447574	1.09479	15.4868	-24.0156									en43407	GSE145097_2_CPT 6uM, 24 hours_MCF7_CPT 6uM, 24 hours
3	3	662.85		-0.0416163	0.863954		-0.667886									en43409	GSE145097_2_CPT 6uM, 24 hours_MCF7_CPT 6uM, 24 hours
3	3	20.0864		0.233193	1.5518	2.97242	-1.93266									en43491	GSE145097_2_CPT 6uM, 24 hours_MCF7_CPT 6uM, 24 hours
3	3	50.2159		0.653457	3.66564	1.06074	-1.37631									en43516	GSE145097_2_CPT 6uM, 24 hours_MCF7_CPT 6uM, 24 hours
3	3	90.3887		0.863496	5.59369	0.802722	0.904463									en43535	GSE145097_2_CPT 6uM, 24 hours_MCF7_CPT 6uM, 24 hours
3	3	20.0864		-0.119114	0.582147		7.22356									en43545	GSE145097_2_CPT 6uM, 24 hours_MCF7_CPT 6uM, 24 hours
3	3	40.1727		0.344158	1.884	2.01404	4.08951									en43550	GSE145097_2_CPT 6uM, 24 hours_MCF7_CPT 6uM, 24 hours
3	3	40.1727		0.100654	1.21211	6.88641	-10.4425									en43673	GSE145097_2_CPT 6uM, 24 hours_MCF7_CPT 6uM, 24 hours
3	3	80.3455		0.276755	1.66184	2.50455	1.86001									en43688	GSE145097_2_CPT 6uM, 24 hours_MCF7_CPT 6uM, 24 hours
3	3	70.3023		0.0344201	0.955415	20.1379	3.66978									en43690	GSE145097_2_CPT 6uM, 24 hours_MCF7_CPT 6uM, 24 hours
3	3	90.3887		0.142641	1.4014	4.85939	0.907987									en43695	GSE145097_2_CPT 6uM, 24 hours_MCF7_CPT 6uM, 24 hours
3	3	180.777		0.243675	1.4679	2.84455	6.07543									en43700	GSE145097_2_CPT 6uM, 24 hours_MCF7_CPT 6uM, 24 hours
3	3	40.1727		0.536003	2.88371	1.29318	-0.864698									en4372	GSE145097_2_CPT 6uM, 24 hours_MCF7_CPT 6uM, 24 hours
3	3	30.1296		-0.0842688	0.599935		8.21007									en43849	GSE145097_2_CPT 6uM, 24 hours_MCF7_CPT 6uM, 24 hours
3	3	30.1296		-0.0842688	0.599935		8.21007									en43905	GSE145097_2_CPT 6uM, 24 hours_MCF7_CPT 6uM, 24 hours
3	3	70.3023		0.571629	3.12823	1.21258	-9.31744									en43907	GSE145097_2_CPT 6uM, 24 hours_MCF7_CPT 6uM, 24 hours
3	3	90.3887		0.469247	2.53721	1.47715	-5.48063									en43921	GSE145097_2_CPT 6uM, 24 hours_MCF7_CPT 6uM, 24 hours
3	3	50.2159		-0.0698284	0.77673		2.37635									en43926	GSE145097_2_CPT 6uM, 24 hours_MCF7_CPT 6uM, 24 hours
3	3	40.1727		0.129074	1.1995	5.37017	2.60471									en43932	GSE145097_2_CPT 6uM, 24 hours_MCF7_CPT 6uM, 24 hours
3	3	180.777		-0.105645	0.740838		0.614487									en44020	GSE145097_2_CPT 6uM, 24 hours_MCF7_CPT 6uM, 24 hours
3	3	70.3023		-0.191252	0.437433		8.43956									en44098	GSE145097_2_CPT 6uM, 24 hours_MCF7_CPT 6uM, 24 hours
3	3	30.1296		0.202326	1.36925	3.4259	4.65732									en45055	GSE145097_2_CPT 6uM, 24 hours_MCF7_CPT 6uM, 24 hours
3	3	20.0864		-0.48116	0.145689		9.75562									en45108	GSE145097_2_CPT 6uM, 24 hours_MCF7_CPT 6uM, 24 hours
3	3	140.605		0.0505564	1.05216	13.7104	-0.872209									en4529	GSE145097_2_CPT 6uM, 24 hours_MCF7_CPT 6uM, 24 hours
3	3	30.1296		-0.287115	0.354574		7.84559									en45334	GSE145097_2_CPT 6uM, 24 hours_MCF7_CPT 6uM, 24 hours
3	3	10444.9		0.0127613	0.99563	54.3165	-4.40103									en45700	GSE145097_2_CPT 6uM, 24 hours_MCF7_CPT 6uM, 24 hours
3	3	1456.26		0.0782014	1.1084	8.86361	-0.149385									en45701	GSE145097_2_CPT 6uM, 24 hours_MCF7_CPT 6uM, 24 hours
3	3	3253.99		0.0455854	1.11688	15.2055	-6.44977									en45702	GSE145097_2_CPT 6uM, 24 hours_MCF7_CPT 6uM, 24 hours
3	3	552.375		-0.00409812	0.974477		-7.72816									en45705	GSE145097_2_CPT 6uM, 24 hours_MCF7_CPT 6uM, 24 hours
3	3	30.1296		0.254387	1.70548	2.72478	-1.87751									en45929	GSE145097_2_CPT 6uM, 24 hours_MCF7_CPT 6uM, 24 hours
3	3	20.0864		-0.119114	0.582147		7.22356									en46022	GSE145097_2_CPT 6uM, 24 hours_MCF7_CPT 6uM, 24 hours
3	3	130.561		0.0875853	1.21008	7.91397	-7.24478									en46192	GSE145097_2_CPT 6uM, 24 hours_MCF7_CPT 6uM, 24 hours
3	3	40.1727		0.0293012	1.00688	23.6559	-0.971915									en46262	GSE145097_2_CPT 6uM, 24 hours_MCF7_CPT 6uM, 24 hours
3	3	80.3455		0.0816223	1.0584	8.49213	3.87101									en46265	GSE145097_2_CPT 6uM, 24 hours_MCF7_CPT 6uM, 24 hours
3	3	3304.21		0.0833036	1.15555	8.32074	-5.30924									en46266	GSE145097_2_CPT 6uM, 24 hours_MCF7_CPT 6uM, 24 hours
3	3	281.209		0.0379662	1.04365	18.2569	-3.46965									en46268	GSE145097_2_CPT 6uM, 24 hours_MCF7_CPT 6uM, 24 hours
3	3	210.907		0.160914	1.39003	4.30755	-10.6074									en46537	GSE145097_2_CPT 6uM, 24 hours_MCF7_CPT 6uM, 24 hours
3	3	180.777		-0.0888271	0.693227		5.0287									en46556	GSE145097_2_CPT 6uM, 24 hours_MCF7_CPT 6uM, 24 hours
3	3	40.1727		0.0502463	0.878056	13.795	7.73388									en46598	GSE145097_2_CPT 6uM, 24 hours_MCF7_CPT 6uM, 24 hours
3	3	30.1296		0.202326	1.36925	3.4259	4.65732									en46600	GSE145097_2_CPT 6uM, 24 hours_MCF7_CPT 6uM, 24 hours
3	3	70.3023		-0.449162	0.176269		9.39111									en46601	GSE145097_2_CPT 6uM, 24 hours_MCF7_CPT 6uM, 24 hours
3	3	20.0864		0.233193	1.5518	2.97242	-1.93266									en46972	GSE145097_2_CPT 6uM, 24 hours_MCF7_CPT 6uM, 24 hours
3	3	472.03		0.0321852	0.896221	21.5362	5.97905									en47027	GSE145097_2_CPT 6uM, 24 hours_MCF7_CPT 6uM, 24 hours
3	3	271.166		0.116079	1.12267	5.97134	4.84607									en47028	GSE145097_2_CPT 6uM, 24 hours_MCF7_CPT 6uM, 24 hours
3	3	110.475		-0.169605	0.431008		9.21369									en47126	GSE145097_2_CPT 6uM, 24 hours_MCF7_CPT 6uM, 24 hours
3	3	30.1296		-0.673742	0.0517866		10.6127									en47971	GSE145097_2_CPT 6uM, 24 hours_MCF7_CPT 6uM, 24 hours
3	3	40.1727		0.262595	1.77468	2.63961	2.2746									en48162	GSE145097_2_CPT 6uM, 24 hours_MCF7_CPT 6uM, 24 hours
3	3	20.0864		-0.251814	0.366054		8.49363									en4856	GSE145097_2_CPT 6uM, 24 hours_MCF7_CPT 6uM, 24 hours
3	3	30.1296		0.398109	2.17151	1.7411	-0.673856									en48620	GSE145097_2_CPT 6uM, 24 hours_MCF7_CPT 6uM, 24 hours
3	3	20.0864		-0.119114	0.582147		7.22356									en49080	GSE145097_2_CPT 6uM, 24 hours_MCF7_CPT 6uM, 24 hours
3	3	30.1296		0.0448882	0.895156	15.4416	6.91569									en49082	GSE145097_2_CPT 6uM, 24 hours_MCF7_CPT 6uM, 24 hours
3	3	20.0864		0.233193	1.5518	2.97242	-1.93266									en49353	GSE145097_2_CPT 6uM, 24 hours_MCF7_CPT 6uM, 24 hours
3	3	40.1727		0.129074	1.1995	5.37017	2.60471									en49380	GSE145097_2_CPT 6uM, 24 hours_MCF7_CPT 6uM, 24 hours
3	3	120.518		0.00869495	0.86344	79.7184	5.3728									en49636	GSE145097_2_CPT 6uM, 24 hours_MCF7_CPT 6uM, 24 hours
3	3	80.3455		0.124777	1.33749	5.55508	-0.791325									en49639	GSE145097_2_CPT 6uM, 24 hours_MCF7_CPT 6uM, 24 hours
3	3	70.3023		0.0400173	0.917669	17.3212	5.81883									en49643	GSE145097_2_CPT 6uM, 24 hours_MCF7_CPT 6uM, 24 hours
3	3	401.727		0.124684	1.22629	5.55922	-0.478531									en49644	GSE145097_2_CPT 6uM, 24 hours_MCF7_CPT 6uM, 24 hours
3	3	70.3023		0.156054	1.25537	4.44171	3.59464									en4976	GSE145097_2_CPT 6uM, 24 hours_MCF7_CPT 6uM, 24 hours
3	3	70.3023		0.0634568	1.14268	10.9231	-12.8446									en4984	GSE145097_2_CPT 6uM, 24 hours_MCF7_CPT 6uM, 24 hours
3	3	30.1296		0.202326	1.36925	3.4259	4.65732									en4985	GSE145097_2_CPT 6uM, 24 hours_MCF7_CPT 6uM, 24 hours
3	3	301.296		0.0246919	0.916056	28.0719	4.56373									en50036	GSE145097_2_CPT 6uM, 24 hours_MCF7_CPT 6uM, 24 hours
3	3	60.2591		0.31762	1.96252	2.18232	1.85886									en50303	GSE145097_2_CPT 6uM, 24 hours_MCF7_CPT 6uM, 24 hours
3	3	30.1296		-0.0604795	0.755449		4.40961									en50308	GSE145097_2_CPT 6uM, 24 hours_MCF7_CPT 6uM, 24 hours
3	3	50.2159		0.123586	1.1423	5.60864	4.8364									en50310	GSE145097_2_CPT 6uM, 24 hours_MCF7_CPT 6uM, 24 hours
3	3	30.1296		-0.0842688	0.599935		8.21007									en50311	GSE145097_2_CPT 6uM, 24 hours_MCF7_CPT 6uM, 24 hours
3	3	281.209		0.0180279	1.0151	38.4485	-6.41014									en50522	GSE145097_2_CPT 6uM, 24 hours_MCF7_CPT 6uM, 24 hours
3	3	271.166		0.0100562	0.926035	68.9275	2.42496									en50523	GSE145097_2_CPT 6uM, 24 hours_MCF7_CPT 6uM, 24 hours
3	3	220.95		0.00449263	0.981198	154.285	-4.89719									en50555	GSE145097_2_CPT 6uM, 24 hours_MCF7_CPT 6uM, 24 hours
3	3	1004.32		0.108832	1.25308	6.36898	-10.9939									en50559	GSE145097_2_CPT 6uM, 24 hours_MCF7_CPT 6uM, 24 hours
3	3	1034.45		0.0328177	1.04038	21.1211	-4.97006									en50562	GSE145097_2_CPT 6uM, 24 hours_MCF7_CPT 6uM, 24 hours
3	3	70.3023		-0.105962	0.586385		7.66967									en50984	GSE145097_2_CPT 6uM, 24 hours_MCF7_CPT 6uM, 24 hours
3	3	50.2159		0.0281305	1.02189	24.6404	-3.34803									en50985	GSE145097_2_CPT 6uM, 24 hours_MCF7_CPT 6uM, 24 hours
3	3	80.3455		-0.119114	0.582147		7.22356									en51132	GSE145097_2_CPT 6uM, 24 hours_MCF7_CPT 6uM, 24 hours
3	3	40.1727		0.181323	1.26284	3.82271	6.37376									en51134	GSE145097_2_CPT 6uM, 24 hours_MCF7_CPT 6uM, 24 hours
3	3	30.1296		0.398109	2.17151	1.7411	-0.673856									en51389	GSE145097_2_CPT 6uM, 24 hours_MCF7_CPT 6uM, 24 hours
3	3	30.1296		0.136047	1.28914	5.0949	-5.74566									en51399	GSE145097_2_CPT 6uM, 24 hours_MCF7_CPT 6uM, 24 hours
3	3	30.1296		-0.0604795	0.755449		4.40961									en51556	GSE145097_2_CPT 6uM, 24 hours_MCF7_CPT 6uM, 24 hours
3	3	30.1296		0.202326	1.36925	3.4259	4.65732									en51585	GSE145097_2_CPT 6uM, 24 hours_MCF7_CPT 6uM, 24 hours
3	3	100.432		0.133524	1.25399	5.1912	-0.990628									en51781	GSE145097_2_CPT 6uM, 24 hours_MCF7_CPT 6uM, 24 hours
3	3	60.2591		-0.180932	0.515428		6.59764									en51785	GSE145097_2_CPT 6uM, 24 hours_MCF7_CPT 6uM, 24 hours
3	3	40.1727		0.0293012	1.00688	23.6559	-0.971915									en51788	GSE145097_2_CPT 6uM, 24 hours_MCF7_CPT 6uM, 24 hours
3	3	50.2159		0.216176	1.44654	3.20641	2.80115									en51940	GSE145097_2_CPT 6uM, 24 hours_MCF7_CPT 6uM, 24 hours
3	3	50.2159		0.166268	1.19292	4.16886	7.20465									en51941	GSE145097_2_CPT 6uM, 24 hours_MCF7_CPT 6uM, 24 hours
3	3	100.432		0.313029	1.77431	2.21432	3.30833									en51949	GSE145097_2_CPT 6uM, 24 hours_MCF7_CPT 6uM, 24 hours
3	3	90.3887		-0.142681	0.584803		6.01508									en51955	GSE145097_2_CPT 6uM, 24 hours_MCF7_CPT 6uM, 24 hours
3	3	923.973		0.0586175	1.07189	11.8249	-1.06198									en51956	GSE145097_2_CPT 6uM, 24 hours_MCF7_CPT 6uM, 24 hours
3	3	261.123		0.0649388	1.15743	10.6739	-7.2368									en51957	GSE145097_2_CPT 6uM, 24 hours_MCF7_CPT 6uM, 24 hours
3	3	261.123		0.0550462	1.04206	12.5921	1.02087									en51958	GSE145097_2_CPT 6uM, 24 hours_MCF7_CPT 6uM, 24 hours
3	3	190.821		-0.0414062	0.805143		3.64969									en51959	GSE145097_2_CPT 6uM, 24 hours_MCF7_CPT 6uM, 24 hours
3	3	70.3023		-0.0921704	0.657064		6.18904									en51961	GSE145097_2_CPT 6uM, 24 hours_MCF7_CPT 6uM, 24 hours
3	3	441.9		-0.00104641	0.934793		0.0163744									en51966	GSE145097_2_CPT 6uM, 24 hours_MCF7_CPT 6uM, 24 hours
3	3	1857.99		-0.0106801	0.910248		0.518786									en51967	GSE145097_2_CPT 6uM, 24 hours_MCF7_CPT 6uM, 24 hours
3	3	50.2159		0.246784	1.64676	2.80872	-11.4508									en51972	GSE145097_2_CPT 6uM, 24 hours_MCF7_CPT 6uM, 24 hours
3	3	80.3455		0.258262	1.53454	2.68389	5.39947									en51973	GSE145097_2_CPT 6uM, 24 hours_MCF7_CPT 6uM, 24 hours
3	3	220.95		-0.0171431	0.925001		-2.52685									en51974	GSE145097_2_CPT 6uM, 24 hours_MCF7_CPT 6uM, 24 hours
3	3	391.684		-0.0190013	0.861764		2.83691									en52028	GSE145097_2_CPT 6uM, 24 hours_MCF7_CPT 6uM, 24 hours
3	3	40.1727		0.262595	1.77468	2.63961	2.2746									en52094	GSE145097_2_CPT 6uM, 24 hours_MCF7_CPT 6uM, 24 hours
3	3	351.511		0.00542592	1.01164	127.747	-26.7861									en52795	GSE145097_2_CPT 6uM, 24 hours_MCF7_CPT 6uM, 24 hours
3	3	120.518		-0.18759	0.461428		7.94411									en52802	GSE145097_2_CPT 6uM, 24 hours_MCF7_CPT 6uM, 24 hours
3	3	241.036		-0.0624964	0.804265		1.33629									en52805	GSE145097_2_CPT 6uM, 24 hours_MCF7_CPT 6uM, 24 hours
3	3	321.382		0.0138753	0.921053	49.9555	3.18986									en52810	GSE145097_2_CPT 6uM, 24 hours_MCF7_CPT 6uM, 24 hours
3	3	472.03		-0.0112757	0.862252		3.64047									en52812	GSE145097_2_CPT 6uM, 24 hours_MCF7_CPT 6uM, 24 hours
3	3	20.0864		-0.582752	0.0935249		10.0835									en52967	GSE145097_2_CPT 6uM, 24 hours_MCF7_CPT 6uM, 24 hours
3	3	60.2591		-0.102628	0.664228		5.30298									en53289	GSE145097_2_CPT 6uM, 24 hours_MCF7_CPT 6uM, 24 hours
3	3	50.2159		0.0987287	1.14726	7.02073	0.804086									en53292	GSE145097_2_CPT 6uM, 24 hours_MCF7_CPT 6uM, 24 hours
3	3	311.339		0.0509295	1.11171	13.6099	-15.8321									en53484	GSE145097_2_CPT 6uM, 24 hours_MCF7_CPT 6uM, 24 hours
3	3	80.3455		0.094543	1.04673	7.33156	5.722									en53624	GSE145097_2_CPT 6uM, 24 hours_MCF7_CPT 6uM, 24 hours
3	3	80.3455		0.138807	1.33202	4.99359	-9.76859									en53798	GSE145097_2_CPT 6uM, 24 hours_MCF7_CPT 6uM, 24 hours
3	3	140.605		0.101227	0.974491	6.84748	8.35507									en54132	GSE145097_2_CPT 6uM, 24 hours_MCF7_CPT 6uM, 24 hours
3	3	60.2591		0.0314863	0.982405	22.0143	1.63799									en54133	GSE145097_2_CPT 6uM, 24 hours_MCF7_CPT 6uM, 24 hours
3	3	70.3023		-0.0522365	0.743237		5.52725									en54165	GSE145097_2_CPT 6uM, 24 hours_MCF7_CPT 6uM, 24 hours
3	3	110.475		0.0708224	1.1841	9.78711	-4.03075									en54191	GSE145097_2_CPT 6uM, 24 hours_MCF7_CPT 6uM, 24 hours
3	3	20.0864		-0.251814	0.366054		8.49363									en54196	GSE145097_2_CPT 6uM, 24 hours_MCF7_CPT 6uM, 24 hours
3	3	20.0864		0.0370085	0.936059	18.7294	4.84016									en54295	GSE145097_2_CPT 6uM, 24 hours_MCF7_CPT 6uM, 24 hours
3	3	30.1296		0.202326	1.36925	3.4259	4.65732									en5439	GSE145097_2_CPT 6uM, 24 hours_MCF7_CPT 6uM, 24 hours
3	3	30.1296		-0.301346	0.27073		9.60616									en54395	GSE145097_2_CPT 6uM, 24 hours_MCF7_CPT 6uM, 24 hours
3	3	40.1727		0.0502463	0.878056	13.795	7.73388									en54727	GSE145097_2_CPT 6uM, 24 hours_MCF7_CPT 6uM, 24 hours
3	3	2169.33		0.0186577	1.02155	37.1506	-8.04173									en54741	GSE145097_2_CPT 6uM, 24 hours_MCF7_CPT 6uM, 24 hours
3	3	150.648		-0.0282768	0.785575		5.58289									en54812	GSE145097_2_CPT 6uM, 24 hours_MCF7_CPT 6uM, 24 hours
3	3	40.1727		0.129074	1.1995	5.37017	2.60471									en55008	GSE145097_2_CPT 6uM, 24 hours_MCF7_CPT 6uM, 24 hours
3	3	70.3023		-0.0117412	0.788759		6.56735									en55056	GSE145097_2_CPT 6uM, 24 hours_MCF7_CPT 6uM, 24 hours
3	3	351.511		0.0465644	1.11536	14.8858	-7.57614									en5518	GSE145097_2_CPT 6uM, 24 hours_MCF7_CPT 6uM, 24 hours
3	3	90.3887		0.302804	1.95076	2.28909	4.5216									en55316	GSE145097_2_CPT 6uM, 24 hours_MCF7_CPT 6uM, 24 hours
3	3	20.0864		-0.119114	0.582147		7.22356									en55317	GSE145097_2_CPT 6uM, 24 hours_MCF7_CPT 6uM, 24 hours
3	3	80.3455		0.138807	1.33202	4.99359	-9.76859									en55420	GSE145097_2_CPT 6uM, 24 hours_MCF7_CPT 6uM, 24 hours
3	3	50.2159		0.430956	2.36687	1.60839	-24.6169									en55421	GSE145097_2_CPT 6uM, 24 hours_MCF7_CPT 6uM, 24 hours
3	3	70.3023		0.183624	1.52788	3.77483	2.00978									en55422	GSE145097_2_CPT 6uM, 24 hours_MCF7_CPT 6uM, 24 hours
3	3	80.3455		0.160128	1.45427	4.32872	1.39816									en55431	GSE145097_2_CPT 6uM, 24 hours_MCF7_CPT 6uM, 24 hours
3	3	100.432		0.251567	1.53164	2.75532	4.48847									en55433	GSE145097_2_CPT 6uM, 24 hours_MCF7_CPT 6uM, 24 hours
3	3	30.1296		0.398109	2.17151	1.7411	-0.673856									en55491	GSE145097_2_CPT 6uM, 24 hours_MCF7_CPT 6uM, 24 hours
3	3	40.1727		-0.0359557	0.839962		2.19895									en55683	GSE145097_2_CPT 6uM, 24 hours_MCF7_CPT 6uM, 24 hours
3	3	60.2591		0.0971113	1.10319	7.13766	3.48887									en55823	GSE145097_2_CPT 6uM, 24 hours_MCF7_CPT 6uM, 24 hours
3	3	100.432		0.266658	1.63373	2.59939	1.27729									en55962	GSE145097_2_CPT 6uM, 24 hours_MCF7_CPT 6uM, 24 hours
3	3	50.2159		0.0822935	1.1763	8.42287	-19.0535									en55963	GSE145097_2_CPT 6uM, 24 hours_MCF7_CPT 6uM, 24 hours
3	3	200.864		0.169231	1.32817	4.09587	1.2494									en55965	GSE145097_2_CPT 6uM, 24 hours_MCF7_CPT 6uM, 24 hours
3	3	522.246		0.0236975	0.998733	29.2498	-1.40056									en55966	GSE145097_2_CPT 6uM, 24 hours_MCF7_CPT 6uM, 24 hours
3	3	110.475		0.154315	1.41111	4.49178	-1.24543									en55968	GSE145097_2_CPT 6uM, 24 hours_MCF7_CPT 6uM, 24 hours
3	3	30.1296		0.0448882	0.895156	15.4416	6.91569									en55971	GSE145097_2_CPT 6uM, 24 hours_MCF7_CPT 6uM, 24 hours
3	3	20.0864		0.233193	1.5518	2.97242	-1.93266									en56087	GSE145097_2_CPT 6uM, 24 hours_MCF7_CPT 6uM, 24 hours
3	3	50.2159		0.246784	1.64676	2.80872	-11.4508									en56334	GSE145097_2_CPT 6uM, 24 hours_MCF7_CPT 6uM, 24 hours
3	3	40.1727		-0.820259	0.0227466		10.8929									en57110	GSE145097_2_CPT 6uM, 24 hours_MCF7_CPT 6uM, 24 hours
3	3	30.1296		0.254387	1.70548	2.72478	-1.87751									en57113	GSE145097_2_CPT 6uM, 24 hours_MCF7_CPT 6uM, 24 hours
3	3	130.561		0.134134	1.26218	5.16757	-1.80066									en57167	GSE145097_2_CPT 6uM, 24 hours_MCF7_CPT 6uM, 24 hours
3	3	241.036		0.141775	1.29046	4.88906	-2.96649									en57180	GSE145097_2_CPT 6uM, 24 hours_MCF7_CPT 6uM, 24 hours
3	3	241.036		0.117523	1.24753	5.89799	-7.59294									en57193	GSE145097_2_CPT 6uM, 24 hours_MCF7_CPT 6uM, 24 hours
3	3	461.987		-0.0444531	0.866156		-1.51429									en57194	GSE145097_2_CPT 6uM, 24 hours_MCF7_CPT 6uM, 24 hours
3	3	50.2159		0.216176	1.44654	3.20641	2.80115									en57197	GSE145097_2_CPT 6uM, 24 hours_MCF7_CPT 6uM, 24 hours
3	3	60.2591		0.31762	1.96252	2.18232	1.85886									en5746	GSE145097_2_CPT 6uM, 24 hours_MCF7_CPT 6uM, 24 hours
3	3	30.1296		0.202326	1.36925	3.4259	4.65732									en57470	GSE145097_2_CPT 6uM, 24 hours_MCF7_CPT 6uM, 24 hours
3	3	150.648		-0.00540181	0.979489		-11.1799									en57477	GSE145097_2_CPT 6uM, 24 hours_MCF7_CPT 6uM, 24 hours
3	3	60.2591		-0.0604795	0.755449		4.40961									en57489	GSE145097_2_CPT 6uM, 24 hours_MCF7_CPT 6uM, 24 hours
3	3	20.0864		-0.251814	0.366054		8.49363									en57491	GSE145097_2_CPT 6uM, 24 hours_MCF7_CPT 6uM, 24 hours
3	3	20.0864		-0.119114	0.582147		7.22356									en57633	GSE145097_2_CPT 6uM, 24 hours_MCF7_CPT 6uM, 24 hours
3	3	130.561		-0.0810389	0.765752		1.82824									en57635	GSE145097_2_CPT 6uM, 24 hours_MCF7_CPT 6uM, 24 hours
3	3	50.2159		0.0413637	0.910646	16.7574	6.1695									en57649	GSE145097_2_CPT 6uM, 24 hours_MCF7_CPT 6uM, 24 hours
3	3	20.0864		0.0370085	0.936059	18.7294	4.84016									en57672	GSE145097_2_CPT 6uM, 24 hours_MCF7_CPT 6uM, 24 hours
3	3	20.0864		-0.119114	0.582147		7.22356									en5770	GSE145097_2_CPT 6uM, 24 hours_MCF7_CPT 6uM, 24 hours
3	3	70.3023		-0.166743	0.515071		7.19916									en5786	GSE145097_2_CPT 6uM, 24 hours_MCF7_CPT 6uM, 24 hours
3	3	30.1296		0.136047	1.28914	5.0949	-5.74566									en58122	GSE145097_2_CPT 6uM, 24 hours_MCF7_CPT 6uM, 24 hours
3	3	90.3887		-0.0502466	0.633786		8.77077									en58313	GSE145097_2_CPT 6uM, 24 hours_MCF7_CPT 6uM, 24 hours
3	3	40.1727		0.129074	1.1995	5.37017	2.60471									en58429	GSE145097_2_CPT 6uM, 24 hours_MCF7_CPT 6uM, 24 hours
3	3	110.475		0.492536	2.6375	1.4073	-0.743105									en58430	GSE145097_2_CPT 6uM, 24 hours_MCF7_CPT 6uM, 24 hours
3	3	100.432		0.0281305	1.02189	24.6404	-3.34803									en58515	GSE145097_2_CPT 6uM, 24 hours_MCF7_CPT 6uM, 24 hours
3	3	40.1727		0.344158	1.884	2.01404	4.08951									en5871	GSE145097_2_CPT 6uM, 24 hours_MCF7_CPT 6uM, 24 hours
3	3	60.2591		0.504873	2.73842	1.37291	-11.6421									en58719	GSE145097_2_CPT 6uM, 24 hours_MCF7_CPT 6uM, 24 hours
3	3	30.1296		0.254387	1.70548	2.72478	-1.87751									en59036	GSE145097_2_CPT 6uM, 24 hours_MCF7_CPT 6uM, 24 hours
3	3	100.432		-0.100014	0.589363		7.83799									en59037	GSE145097_2_CPT 6uM, 24 hours_MCF7_CPT 6uM, 24 hours
3	3	40.1727		-0.18759	0.461428		7.94411									en59054	GSE145097_2_CPT 6uM, 24 hours_MCF7_CPT 6uM, 24 hours
3	3	20.0864		0.233193	1.5518	2.97242	-1.93266									en59056	GSE145097_2_CPT 6uM, 24 hours_MCF7_CPT 6uM, 24 hours
3	3	562.418		0.0132706	1.01502	52.2318	-10.0047									en59057	GSE145097_2_CPT 6uM, 24 hours_MCF7_CPT 6uM, 24 hours
3	3	140.605		-0.103837	0.718707		2.47746									en59058	GSE145097_2_CPT 6uM, 24 hours_MCF7_CPT 6uM, 24 hours
3	3	90.3887		-0.160835	0.461297		8.80097									en59070	GSE145097_2_CPT 6uM, 24 hours_MCF7_CPT 6uM, 24 hours
3	3	200.864		0.0759852	1.19601	9.12213	-4.03507									en59071	GSE145097_2_CPT 6uM, 24 hours_MCF7_CPT 6uM, 24 hours
3	3	170.734		0.164743	1.32564	4.20745	0.373674									en59072	GSE145097_2_CPT 6uM, 24 hours_MCF7_CPT 6uM, 24 hours
3	3	40.1727		-0.422641	0.151126		10.3312									en59080	GSE145097_2_CPT 6uM, 24 hours_MCF7_CPT 6uM, 24 hours
3	3	271.166		-0.0186028	0.904604		-0.398258									en59125	GSE145097_2_CPT 6uM, 24 hours_MCF7_CPT 6uM, 24 hours
3	3	40.1727		0.0370085	0.936059	18.7294	4.84016									en59127	GSE145097_2_CPT 6uM, 24 hours_MCF7_CPT 6uM, 24 hours
3	3	150.648		-0.105029	0.679172		4.50267									en59128	GSE145097_2_CPT 6uM, 24 hours_MCF7_CPT 6uM, 24 hours
3	3	190.821		0.0819619	1.11022	8.45695	0.508961									en59129	GSE145097_2_CPT 6uM, 24 hours_MCF7_CPT 6uM, 24 hours
3	3	60.2591		0.0820392	1.12401	8.44898	-0.832442									en59146	GSE145097_2_CPT 6uM, 24 hours_MCF7_CPT 6uM, 24 hours
3	3	170.734		-0.0424539	0.86809		-1.30639									en59152	GSE145097_2_CPT 6uM, 24 hours_MCF7_CPT 6uM, 24 hours
3	3	291.252		0.183805	1.42824	3.77111	-7.93349									en59155	GSE145097_2_CPT 6uM, 24 hours_MCF7_CPT 6uM, 24 hours
3	3	130.561		0.0669182	1.14861	10.3581	-14.6906									en59225	GSE145097_2_CPT 6uM, 24 hours_MCF7_CPT 6uM, 24 hours
3	3	9591.24		0.0692474	1.16259	10.0097	-8.95916									en59384	GSE145097_2_CPT 6uM, 24 hours_MCF7_CPT 6uM, 24 hours
3	3	34056.4		0.0586891	1.13167	11.8105	-13.0465									en59385	GSE145097_2_CPT 6uM, 24 hours_MCF7_CPT 6uM, 24 hours
3	3	2942.65		0.0930028	1.22929	7.45297	-5.50349									en59386	GSE145097_2_CPT 6uM, 24 hours_MCF7_CPT 6uM, 24 hours
3	3	20186.8		0.0602634	1.12967	11.502	-22.0818									en59391	GSE145097_2_CPT 6uM, 24 hours_MCF7_CPT 6uM, 24 hours
3	3	4720.3		0.0675946	1.16461	10.2545	-6.88679									en59392	GSE145097_2_CPT 6uM, 24 hours_MCF7_CPT 6uM, 24 hours
3	3	8255.5		0.0881641	1.142	7.86201	-1.22067									en59393	GSE145097_2_CPT 6uM, 24 hours_MCF7_CPT 6uM, 24 hours
3	3	210.907		-0.0224304	0.844646		3.43383									en59457	GSE145097_2_CPT 6uM, 24 hours_MCF7_CPT 6uM, 24 hours
3	3	180.777		0.0286391	1.01519	24.2028	-2.17483									en59463	GSE145097_2_CPT 6uM, 24 hours_MCF7_CPT 6uM, 24 hours
3	3	30.1296		-0.400445	0.179313		9.99895									en59466	GSE145097_2_CPT 6uM, 24 hours_MCF7_CPT 6uM, 24 hours
3	3	150.648		0.025422	1.06281	27.2657	-10.6542									en59469	GSE145097_2_CPT 6uM, 24 hours_MCF7_CPT 6uM, 24 hours
3	3	110.475		0.118378	1.33068	5.85537	0.169511									en59470	GSE145097_2_CPT 6uM, 24 hours_MCF7_CPT 6uM, 24 hours
3	3	140.605		0.0929503	1.17481	7.45718	-4.47937									en59472	GSE145097_2_CPT 6uM, 24 hours_MCF7_CPT 6uM, 24 hours
3	3	281.209		0.0100712	0.955671	68.8248	0.163658									en59474	GSE145097_2_CPT 6uM, 24 hours_MCF7_CPT 6uM, 24 hours
3	3	200.864		0.0487863	1.13503	14.2078	-3.9404									en59475	GSE145097_2_CPT 6uM, 24 hours_MCF7_CPT 6uM, 24 hours
3	3	190.821		0.0134766	1.01625	51.4333	-10.425									en59490	GSE145097_2_CPT 6uM, 24 hours_MCF7_CPT 6uM, 24 hours
3	3	321.382		0.119522	1.27049	5.79934	-29.3988									en59491	GSE145097_2_CPT 6uM, 24 hours_MCF7_CPT 6uM, 24 hours
3	3	301.296		0.0897561	1.1597	7.72256	-3.13404									en59492	GSE145097_2_CPT 6uM, 24 hours_MCF7_CPT 6uM, 24 hours
3	3	2199.46		0.0375292	1.03561	18.4695	-2.36875									en59495	GSE145097_2_CPT 6uM, 24 hours_MCF7_CPT 6uM, 24 hours
3	3	572.462		0.0011947	0.90951	580.185	2.33449									en59496	GSE145097_2_CPT 6uM, 24 hours_MCF7_CPT 6uM, 24 hours
3	3	281.209		0.0877263	1.13145	7.90125	-0.192538									en59497	GSE145097_2_CPT 6uM, 24 hours_MCF7_CPT 6uM, 24 hours
3	3	40.1727		0.262595	1.77468	2.63961	2.2746									en59560	GSE145097_2_CPT 6uM, 24 hours_MCF7_CPT 6uM, 24 hours
3	3	120.518		0.0665965	1.17448	10.4082	-4.02258									en598	GSE145097_2_CPT 6uM, 24 hours_MCF7_CPT 6uM, 24 hours
3	3	130.561		0.227112	1.51268	3.052	0.348065									en60067	GSE145097_2_CPT 6uM, 24 hours_MCF7_CPT 6uM, 24 hours
3	3	30.1296		0.398109	2.17151	1.7411	-0.673856									en60089	GSE145097_2_CPT 6uM, 24 hours_MCF7_CPT 6uM, 24 hours
3	3	30.1296		-0.0842688	0.599935		8.21007									en601	GSE145097_2_CPT 6uM, 24 hours_MCF7_CPT 6uM, 24 hours
3	3	40.1727		-0.0359557	0.839962		2.19895									en60103	GSE145097_2_CPT 6uM, 24 hours_MCF7_CPT 6uM, 24 hours
3	3	30.1296		0.398109	2.17151	1.7411	-0.673856									en60296	GSE145097_2_CPT 6uM, 24 hours_MCF7_CPT 6uM, 24 hours
3	3	50.2159		-0.286639	0.259869		10.1003									en60357	GSE145097_2_CPT 6uM, 24 hours_MCF7_CPT 6uM, 24 hours
3	3	110.475		0.150711	1.32404	4.59918	-4.73438									en60375	GSE145097_2_CPT 6uM, 24 hours_MCF7_CPT 6uM, 24 hours
3	3	40.1727		0.100654	1.21211	6.88641	-10.4425									en60401	GSE145097_2_CPT 6uM, 24 hours_MCF7_CPT 6uM, 24 hours
3	3	30.1296		0.0448882	0.895156	15.4416	6.91569									en60550	GSE145097_2_CPT 6uM, 24 hours_MCF7_CPT 6uM, 24 hours
3	3	4579.69		-0.00319033	0.958079		-3.42608									en60551	GSE145097_2_CPT 6uM, 24 hours_MCF7_CPT 6uM, 24 hours
3	3	20.0864		0.0370085	0.936059	18.7294	4.84016									en60886	GSE145097_2_CPT 6uM, 24 hours_MCF7_CPT 6uM, 24 hours
3	3	30.1296		-0.0842688	0.599935		8.21007									en61477	GSE145097_2_CPT 6uM, 24 hours_MCF7_CPT 6uM, 24 hours
3	3	40.1727		-0.300336	0.354107		7.48323									en61491	GSE145097_2_CPT 6uM, 24 hours_MCF7_CPT 6uM, 24 hours
3	3	40.1727		0.181323	1.26284	3.82271	6.37376									en61502	GSE145097_2_CPT 6uM, 24 hours_MCF7_CPT 6uM, 24 hours
3	3	100.432		-0.168867	0.545476		6.11516									en61507	GSE145097_2_CPT 6uM, 24 hours_MCF7_CPT 6uM, 24 hours
3	3	301.296		-0.0493768	0.867921		-3.00132									en61526	GSE145097_2_CPT 6uM, 24 hours_MCF7_CPT 6uM, 24 hours
3	3	30.1296		0.0448882	0.895156	15.4416	6.91569									en61554	GSE145097_2_CPT 6uM, 24 hours_MCF7_CPT 6uM, 24 hours
3	3	30.1296		0.254387	1.70548	2.72478	-1.87751									en61569	GSE145097_2_CPT 6uM, 24 hours_MCF7_CPT 6uM, 24 hours
3	3	261.123		0.0646064	1.08351	10.7288	-0.839894									en61576	GSE145097_2_CPT 6uM, 24 hours_MCF7_CPT 6uM, 24 hours
3	3	311.339		-0.0285906	0.87685		0.43232									en61604	GSE145097_2_CPT 6uM, 24 hours_MCF7_CPT 6uM, 24 hours
3	3	50.2159		0.0987287	1.14726	7.02073	0.804086									en61646	GSE145097_2_CPT 6uM, 24 hours_MCF7_CPT 6uM, 24 hours
3	3	241.036		0.0971113	1.10319	7.13766	3.48887									en61673	GSE145097_2_CPT 6uM, 24 hours_MCF7_CPT 6uM, 24 hours
3	3	120.518		0.0820392	1.12401	8.44898	-0.832442									en61782	GSE145097_2_CPT 6uM, 24 hours_MCF7_CPT 6uM, 24 hours
3	3	80.3455		-0.00403591	0.919182		0.871154									en61832	GSE145097_2_CPT 6uM, 24 hours_MCF7_CPT 6uM, 24 hours
3	3	50.2159		0.0987287	1.14726	7.02073	0.804086									en61833	GSE145097_2_CPT 6uM, 24 hours_MCF7_CPT 6uM, 24 hours
3	3	60.2591		0.2168	1.63703	3.19717	2.79625									en61834	GSE145097_2_CPT 6uM, 24 hours_MCF7_CPT 6uM, 24 hours
3	3	60.2591		-0.0604795	0.755449		4.40961									en61879	GSE145097_2_CPT 6uM, 24 hours_MCF7_CPT 6uM, 24 hours
3	3	30.1296		0.0314863	0.982405	22.0143	1.63799									en61884	GSE145097_2_CPT 6uM, 24 hours_MCF7_CPT 6uM, 24 hours
3	3	30.1296		-0.142681	0.584803		6.01508									en61885	GSE145097_2_CPT 6uM, 24 hours_MCF7_CPT 6uM, 24 hours
3	3	30.1296		-0.142681	0.584803		6.01508									en62019	GSE145097_2_CPT 6uM, 24 hours_MCF7_CPT 6uM, 24 hours
3	3	20.0864		0.233193	1.5518	2.97242	-1.93266									en62036	GSE145097_2_CPT 6uM, 24 hours_MCF7_CPT 6uM, 24 hours
3	3	50.2159		-0.0265517	0.812143		4.63421									en62389	GSE145097_2_CPT 6uM, 24 hours_MCF7_CPT 6uM, 24 hours
3	3	110.475		-0.0869742	0.715839		4.15291									en62429	GSE145097_2_CPT 6uM, 24 hours_MCF7_CPT 6uM, 24 hours
3	3	30.1296		-0.217629	0.454669		7.08335									en62430	GSE145097_2_CPT 6uM, 24 hours_MCF7_CPT 6uM, 24 hours
3	3	60.2591		0.0274007	1.032	25.2967	-5.69699									en62432	GSE145097_2_CPT 6uM, 24 hours_MCF7_CPT 6uM, 24 hours
3	3	50.2159		0.216176	1.44654	3.20641	2.80115									en62644	GSE145097_2_CPT 6uM, 24 hours_MCF7_CPT 6uM, 24 hours
3	3	873.757		0.0901292	1.15229	7.6906	-1.91773									en62835	GSE145097_2_CPT 6uM, 24 hours_MCF7_CPT 6uM, 24 hours
3	3	40.1727		0.0370085	0.936059	18.7294	4.84016									en62962	GSE145097_2_CPT 6uM, 24 hours_MCF7_CPT 6uM, 24 hours
3	3	20.0864		0.0370085	0.936059	18.7294	4.84016									en62964	GSE145097_2_CPT 6uM, 24 hours_MCF7_CPT 6uM, 24 hours
3	3	60.2591		0.0820392	1.12401	8.44898	-0.832442									en63024	GSE145097_2_CPT 6uM, 24 hours_MCF7_CPT 6uM, 24 hours
3	3	291.252		-0.083411	0.733309		3.56872									en63026	GSE145097_2_CPT 6uM, 24 hours_MCF7_CPT 6uM, 24 hours
3	3	311.339		0.0725771	1.02663	9.5505	4.37507									en63027	GSE145097_2_CPT 6uM, 24 hours_MCF7_CPT 6uM, 24 hours
3	3	40.1727		-0.204052	0.497056		6.21792									en63126	GSE145097_2_CPT 6uM, 24 hours_MCF7_CPT 6uM, 24 hours
3	3	40.1727		0.181323	1.26284	3.82271	6.37376									en63132	GSE145097_2_CPT 6uM, 24 hours_MCF7_CPT 6uM, 24 hours
3	3	331.425		0.316586	1.76262	2.18944	4.71766									en63261	GSE145097_2_CPT 6uM, 24 hours_MCF7_CPT 6uM, 24 hours
3	3	60.2591		0.586925	3.17051	1.18098	2.75049									en63263	GSE145097_2_CPT 6uM, 24 hours_MCF7_CPT 6uM, 24 hours
3	3	160.691		0.0370085	0.936059	18.7294	4.84016									en63311	GSE145097_2_CPT 6uM, 24 hours_MCF7_CPT 6uM, 24 hours
3	3	110.475		-0.263971	0.320439		9.27956									en63317	GSE145097_2_CPT 6uM, 24 hours_MCF7_CPT 6uM, 24 hours
3	3	60.2591		0.417901	2.18861	1.65864	5.15445									en63568	GSE145097_2_CPT 6uM, 24 hours_MCF7_CPT 6uM, 24 hours
3	3	130.561		-0.0640622	0.804713		1.08677									en63569	GSE145097_2_CPT 6uM, 24 hours_MCF7_CPT 6uM, 24 hours
3	3	20.0864		-0.119114	0.582147		7.22356									en63693	GSE145097_2_CPT 6uM, 24 hours_MCF7_CPT 6uM, 24 hours
3	3	30.1296		0.202326	1.36925	3.4259	4.65732									en63717	GSE145097_2_CPT 6uM, 24 hours_MCF7_CPT 6uM, 24 hours
3	3	20.0864		0.233193	1.5518	2.97242	-1.93266									en63718	GSE145097_2_CPT 6uM, 24 hours_MCF7_CPT 6uM, 24 hours
3	3	20.0864		0.233193	1.5518	2.97242	-1.93266									en63719	GSE145097_2_CPT 6uM, 24 hours_MCF7_CPT 6uM, 24 hours
3	3	120.518		-0.0158986	0.86062		3.24589									en63734	GSE145097_2_CPT 6uM, 24 hours_MCF7_CPT 6uM, 24 hours
3	3	30.1296		0.202326	1.36925	3.4259	4.65732									en63737	GSE145097_2_CPT 6uM, 24 hours_MCF7_CPT 6uM, 24 hours
3	3	50.2159		0.0822935	1.1763	8.42287	-19.0535									en63932	GSE145097_2_CPT 6uM, 24 hours_MCF7_CPT 6uM, 24 hours
3	3	80.3455		-0.131889	0.451374		9.83482									en64163	GSE145097_2_CPT 6uM, 24 hours_MCF7_CPT 6uM, 24 hours
3	3	30.1296		0.254387	1.70548	2.72478	-1.87751									en64210	GSE145097_2_CPT 6uM, 24 hours_MCF7_CPT 6uM, 24 hours
3	3	50.2159		-0.0698284	0.77673		2.37635									en64457	GSE145097_2_CPT 6uM, 24 hours_MCF7_CPT 6uM, 24 hours
3	3	60.2591		0.136047	1.28914	5.0949	-5.74566									en64548	GSE145097_2_CPT 6uM, 24 hours_MCF7_CPT 6uM, 24 hours
3	3	391.684		-0.0753105	0.714404		5.08405									en64782	GSE145097_2_CPT 6uM, 24 hours_MCF7_CPT 6uM, 24 hours
3	3	10736.2		0.0311034	0.997186	22.2853	0.382086									en64786	GSE145097_2_CPT 6uM, 24 hours_MCF7_CPT 6uM, 24 hours
3	3	1436.18		0.0482797	1.11573	14.3569	-8.84891									en64787	GSE145097_2_CPT 6uM, 24 hours_MCF7_CPT 6uM, 24 hours
3	3	40.1727		0.17861	1.46509	3.8808	-3.14123									en6480	GSE145097_2_CPT 6uM, 24 hours_MCF7_CPT 6uM, 24 hours
3	3	130.561		-0.0770039	0.702698		5.43771									en64914	GSE145097_2_CPT 6uM, 24 hours_MCF7_CPT 6uM, 24 hours
3	3	291.252		0.0408277	1.01613	16.9774	0.559892									en64916	GSE145097_2_CPT 6uM, 24 hours_MCF7_CPT 6uM, 24 hours
3	3	30.1296		0.0314863	0.982405	22.0143	1.63799									en64918	GSE145097_2_CPT 6uM, 24 hours_MCF7_CPT 6uM, 24 hours
3	3	80.3455		-0.106296	0.644251		5.84466									en64964	GSE145097_2_CPT 6uM, 24 hours_MCF7_CPT 6uM, 24 hours
3	3	110.475		0.163779	1.25328	4.23221	4.7612									en65022	GSE145097_2_CPT 6uM, 24 hours_MCF7_CPT 6uM, 24 hours
3	3	120.518		0.308994	1.84938	2.24324	-13.537									en65269	GSE145097_2_CPT 6uM, 24 hours_MCF7_CPT 6uM, 24 hours
3	3	301.296		0.150682	1.29518	4.60006	-0.463758									en65278	GSE145097_2_CPT 6uM, 24 hours_MCF7_CPT 6uM, 24 hours
3	3	50.2159		-0.0698284	0.77673		2.37635									en65280	GSE145097_2_CPT 6uM, 24 hours_MCF7_CPT 6uM, 24 hours
3	3	140.605		0.0284554	1.01758	24.3591	-2.56801									en65281	GSE145097_2_CPT 6uM, 24 hours_MCF7_CPT 6uM, 24 hours
3	3	30.1296		0.136047	1.28914	5.0949	-5.74566									en65309	GSE145097_2_CPT 6uM, 24 hours_MCF7_CPT 6uM, 24 hours
3	3	30.1296		-0.400445	0.179313		9.99895									en65437	GSE145097_2_CPT 6uM, 24 hours_MCF7_CPT 6uM, 24 hours
3	3	50.2159		0.653457	3.66564	1.06074	-1.37631									en65439	GSE145097_2_CPT 6uM, 24 hours_MCF7_CPT 6uM, 24 hours
3	3	30.1296		0.398109	2.17151	1.7411	-0.673856									en65462	GSE145097_2_CPT 6uM, 24 hours_MCF7_CPT 6uM, 24 hours
3	3	40.1727		-0.336543	0.219614		10.078									en65517	GSE145097_2_CPT 6uM, 24 hours_MCF7_CPT 6uM, 24 hours
3	3	60.2591		0.162399	1.30567	4.26817	1.50417									en65550	GSE145097_2_CPT 6uM, 24 hours_MCF7_CPT 6uM, 24 hours
3	3	100.432		0.257826	1.73367	2.68843	0.136814									en65552	GSE145097_2_CPT 6uM, 24 hours_MCF7_CPT 6uM, 24 hours
3	3	40.1727		0.100654	1.21211	6.88641	-10.4425									en65559	GSE145097_2_CPT 6uM, 24 hours_MCF7_CPT 6uM, 24 hours
3	3	30.1296		-0.142681	0.584803		6.01508									en65561	GSE145097_2_CPT 6uM, 24 hours_MCF7_CPT 6uM, 24 hours
3	3	60.2591		-0.223526	0.484849		5.79319									en65636	GSE145097_2_CPT 6uM, 24 hours_MCF7_CPT 6uM, 24 hours
3	3	90.3887		0.263401	1.59132	2.63153	3.46132									en65695	GSE145097_2_CPT 6uM, 24 hours_MCF7_CPT 6uM, 24 hours
3	3	30.1296		-0.0842688	0.599935		8.21007									en65700	GSE145097_2_CPT 6uM, 24 hours_MCF7_CPT 6uM, 24 hours
3	3	20.0864		0.233193	1.5518	2.97242	-1.93266									en6584	GSE145097_2_CPT 6uM, 24 hours_MCF7_CPT 6uM, 24 hours
3	3	100.432		0.16849	1.28383	4.11387	3.94068									en6595	GSE145097_2_CPT 6uM, 24 hours_MCF7_CPT 6uM, 24 hours
3	3	210.907		0.0476424	1.00861	14.549	2.25328									en65996	GSE145097_2_CPT 6uM, 24 hours_MCF7_CPT 6uM, 24 hours
3	3	210.907		0.217992	1.40331	3.17969	5.3107									en6601	GSE145097_2_CPT 6uM, 24 hours_MCF7_CPT 6uM, 24 hours
3	3	100.432		-0.303346	0.37962		6.53504									en66016	GSE145097_2_CPT 6uM, 24 hours_MCF7_CPT 6uM, 24 hours
3	3	90.3887		0.0648155	1.07438	10.6942	0.135822									en66064	GSE145097_2_CPT 6uM, 24 hours_MCF7_CPT 6uM, 24 hours
3	3	50.2159		0.319704	1.84838	2.16809	-0.941681									en66111	GSE145097_2_CPT 6uM, 24 hours_MCF7_CPT 6uM, 24 hours
3	3	20.0864		-0.371136	0.230437		9.26236									en66273	GSE145097_2_CPT 6uM, 24 hours_MCF7_CPT 6uM, 24 hours
3	3	40.1727		0.536003	2.88371	1.29318	-0.864698									en66471	GSE145097_2_CPT 6uM, 24 hours_MCF7_CPT 6uM, 24 hours
3	3	30.1296		0.136047	1.28914	5.0949	-5.74566									en66615	GSE145097_2_CPT 6uM, 24 hours_MCF7_CPT 6uM, 24 hours
3	3	70.3023		-0.201861	0.456485		7.59324									en66616	GSE145097_2_CPT 6uM, 24 hours_MCF7_CPT 6uM, 24 hours
3	3	70.3023		0.156054	1.25537	4.44171	3.59464									en66850	GSE145097_2_CPT 6uM, 24 hours_MCF7_CPT 6uM, 24 hours
3	3	381.641		0.121027	1.3334	5.72721	-0.217041									en67010	GSE145097_2_CPT 6uM, 24 hours_MCF7_CPT 6uM, 24 hours
3	3	220.95		0.225948	1.50539	3.06773	0.683242									en67169	GSE145097_2_CPT 6uM, 24 hours_MCF7_CPT 6uM, 24 hours
3	3	251.08		0.177802	1.31457	3.89843	3.7355									en67234	GSE145097_2_CPT 6uM, 24 hours_MCF7_CPT 6uM, 24 hours
3	3	70.3023		0.302948	1.85694	2.288	-5.0428									en67235	GSE145097_2_CPT 6uM, 24 hours_MCF7_CPT 6uM, 24 hours
3	3	20.0864		0.233193	1.5518	2.97242	-1.93266									en67304	GSE145097_2_CPT 6uM, 24 hours_MCF7_CPT 6uM, 24 hours
3	3	20.0864		0.233193	1.5518	2.97242	-1.93266									en6774	GSE145097_2_CPT 6uM, 24 hours_MCF7_CPT 6uM, 24 hours
3	3	30.1296		0.136047	1.28914	5.0949	-5.74566									en67907	GSE145097_2_CPT 6uM, 24 hours_MCF7_CPT 6uM, 24 hours
3	3	70.3023		0.366328	2.06715	1.89215	-8.19292									en67913	GSE145097_2_CPT 6uM, 24 hours_MCF7_CPT 6uM, 24 hours
3	3	30.1296		-0.629754	0.0879937		9.84333									en67926	GSE145097_2_CPT 6uM, 24 hours_MCF7_CPT 6uM, 24 hours
3	3	50.2159		0.319704	1.84838	2.16809	-0.941681									en67999	GSE145097_2_CPT 6uM, 24 hours_MCF7_CPT 6uM, 24 hours
3	3	261.123		0.0748872	1.18683	9.25589	-5.43473									en68003	GSE145097_2_CPT 6uM, 24 hours_MCF7_CPT 6uM, 24 hours
3	3	80.3455		0.156496	1.33828	4.42916	-4.4056									en68004	GSE145097_2_CPT 6uM, 24 hours_MCF7_CPT 6uM, 24 hours
3	3	30.1296		0.202326	1.36925	3.4259	4.65732									en6809	GSE145097_2_CPT 6uM, 24 hours_MCF7_CPT 6uM, 24 hours
3	3	20.0864		0.233193	1.5518	2.97242	-1.93266									en68479	GSE145097_2_CPT 6uM, 24 hours_MCF7_CPT 6uM, 24 hours
3	3	30.1296		0.202326	1.36925	3.4259	4.65732									en68490	GSE145097_2_CPT 6uM, 24 hours_MCF7_CPT 6uM, 24 hours
3	3	20.0864		-0.119114	0.582147		7.22356									en68553	GSE145097_2_CPT 6uM, 24 hours_MCF7_CPT 6uM, 24 hours
3	3	80.3455		0.0265399	1.04476	26.1171	-11.1801									en68654	GSE145097_2_CPT 6uM, 24 hours_MCF7_CPT 6uM, 24 hours
3	3	40.1727		-0.591292	0.069259		10.657									en68684	GSE145097_2_CPT 6uM, 24 hours_MCF7_CPT 6uM, 24 hours
3	3	90.3887		-0.028348	0.867786		1.22318									en68713	GSE145097_2_CPT 6uM, 24 hours_MCF7_CPT 6uM, 24 hours
3	3	20.0864		0.233193	1.5518	2.97242	-1.93266									en68955	GSE145097_2_CPT 6uM, 24 hours_MCF7_CPT 6uM, 24 hours
3	3	90.3887		0.0935082	1.02747	7.41269	6.31337									en68971	GSE145097_2_CPT 6uM, 24 hours_MCF7_CPT 6uM, 24 hours
3	3	110.475		0.145621	1.23279	4.75993	3.25685									en68972	GSE145097_2_CPT 6uM, 24 hours_MCF7_CPT 6uM, 24 hours
3	3	30.1296		0.398109	2.17151	1.7411	-0.673856									en68973	GSE145097_2_CPT 6uM, 24 hours_MCF7_CPT 6uM, 24 hours
3	3	50.2159		-0.162846	0.475889		8.39391									en68976	GSE145097_2_CPT 6uM, 24 hours_MCF7_CPT 6uM, 24 hours
3	3	40.1727		0.233193	1.5518	2.97242	-1.93266									en69165	GSE145097_2_CPT 6uM, 24 hours_MCF7_CPT 6uM, 24 hours
3	3	70.3023		-0.04132	0.86253		-0.461362									en69249	GSE145097_2_CPT 6uM, 24 hours_MCF7_CPT 6uM, 24 hours
3	3	50.2159		-0.0822007	0.686769		5.7125									en69315	GSE145097_2_CPT 6uM, 24 hours_MCF7_CPT 6uM, 24 hours
3	3	30.1296		0.254387	1.70548	2.72478	-1.87751									en69318	GSE145097_2_CPT 6uM, 24 hours_MCF7_CPT 6uM, 24 hours
3	3	50.2159		-0.114422	0.679268		3.78233									en69319	GSE145097_2_CPT 6uM, 24 hours_MCF7_CPT 6uM, 24 hours
3	3	40.1727		0.100654	1.21211	6.88641	-10.4425									en695	GSE145097_2_CPT 6uM, 24 hours_MCF7_CPT 6uM, 24 hours
3	3	401.727		0.0802967	1.14143	8.63233	-3.86275									en69536	GSE145097_2_CPT 6uM, 24 hours_MCF7_CPT 6uM, 24 hours
3	3	50.2159		0.471564	2.48475	1.46989	3.4258									en69540	GSE145097_2_CPT 6uM, 24 hours_MCF7_CPT 6uM, 24 hours
3	3	210.907		0.212347	1.63098	3.26421	3.24823									en6957	GSE145097_2_CPT 6uM, 24 hours_MCF7_CPT 6uM, 24 hours
3	3	713.066		0.119469	1.235	5.80192	-3.42475									en6958	GSE145097_2_CPT 6uM, 24 hours_MCF7_CPT 6uM, 24 hours
3	3	40.1727		0.100654	1.21211	6.88641	-10.4425									en69581	GSE145097_2_CPT 6uM, 24 hours_MCF7_CPT 6uM, 24 hours
3	3	160.691		-0.0422808	0.762897		5.46063									en69693	GSE145097_2_CPT 6uM, 24 hours_MCF7_CPT 6uM, 24 hours
3	3	311.339		0.152618	1.34724	4.54171	-11.0319									en69769	GSE145097_2_CPT 6uM, 24 hours_MCF7_CPT 6uM, 24 hours
3	3	80.3455		0.113071	1.20048	6.13018	-0.89805									en69773	GSE145097_2_CPT 6uM, 24 hours_MCF7_CPT 6uM, 24 hours
3	3	60.2591		-0.0280584	0.662473		9.02463									en69774	GSE145097_2_CPT 6uM, 24 hours_MCF7_CPT 6uM, 24 hours
3	3	150.648		-0.0735119	0.747373		3.70613									en69776	GSE145097_2_CPT 6uM, 24 hours_MCF7_CPT 6uM, 24 hours
3	3	220.95		-0.104107	0.733655		1.40243									en69780	GSE145097_2_CPT 6uM, 24 hours_MCF7_CPT 6uM, 24 hours
3	3	522.246		0.0678836	1.18072	10.2108	-3.43236									en69782	GSE145097_2_CPT 6uM, 24 hours_MCF7_CPT 6uM, 24 hours
3	3	1817.82		0.0349565	1.06529	19.8288	-13.0619									en69998	GSE145097_2_CPT 6uM, 24 hours_MCF7_CPT 6uM, 24 hours
3	3	90.3887		-0.340034	0.270879		8.84197									en700	GSE145097_2_CPT 6uM, 24 hours_MCF7_CPT 6uM, 24 hours
3	3	30.1296		0.398109	2.17151	1.7411	-0.673856									en70102	GSE145097_2_CPT 6uM, 24 hours_MCF7_CPT 6uM, 24 hours
3	3	20.0864		0.233193	1.5518	2.97242	-1.93266									en70197	GSE145097_2_CPT 6uM, 24 hours_MCF7_CPT 6uM, 24 hours
3	3	100.432		0.653457	3.66564	1.06074	-1.37631									en70431	GSE145097_2_CPT 6uM, 24 hours_MCF7_CPT 6uM, 24 hours
3	3	40.1727		-0.0449166	0.736323		6.2453									en70436	GSE145097_2_CPT 6uM, 24 hours_MCF7_CPT 6uM, 24 hours
3	3	30.1296		-0.352305	0.277306		8.41262									en70438	GSE145097_2_CPT 6uM, 24 hours_MCF7_CPT 6uM, 24 hours
3	3	60.2591		-0.371136	0.230437		9.26236									en70440	GSE145097_2_CPT 6uM, 24 hours_MCF7_CPT 6uM, 24 hours
3	3	60.2591		0.417901	2.18861	1.65864	5.15445									en70789	GSE145097_2_CPT 6uM, 24 hours_MCF7_CPT 6uM, 24 hours
3	3	50.2159		0.471564	2.48475	1.46989	3.4258									en70845	GSE145097_2_CPT 6uM, 24 hours_MCF7_CPT 6uM, 24 hours
3	3	60.2591		-0.0185824	0.797084		5.83683									en70847	GSE145097_2_CPT 6uM, 24 hours_MCF7_CPT 6uM, 24 hours
3	3	60.2591		0.2168	1.63703	3.19717	2.79625									en70851	GSE145097_2_CPT 6uM, 24 hours_MCF7_CPT 6uM, 24 hours
3	3	40.1727		0.262595	1.77468	2.63961	2.2746									en70853	GSE145097_2_CPT 6uM, 24 hours_MCF7_CPT 6uM, 24 hours
3	3	70.3023		-0.0921704	0.657064		6.18904									en70906	GSE145097_2_CPT 6uM, 24 hours_MCF7_CPT 6uM, 24 hours
3	3	60.2591		0.295644	1.71824	2.34453	2.71228									en71214	GSE145097_2_CPT 6uM, 24 hours_MCF7_CPT 6uM, 24 hours
3	3	241.036		-0.0185824	0.797084		5.83683									en71233	GSE145097_2_CPT 6uM, 24 hours_MCF7_CPT 6uM, 24 hours
3	3	40.1727		0.129074	1.1995	5.37017	2.60471									en71244	GSE145097_2_CPT 6uM, 24 hours_MCF7_CPT 6uM, 24 hours
3	3	50.2159		0.216176	1.44654	3.20641	2.80115									en71250	GSE145097_2_CPT 6uM, 24 hours_MCF7_CPT 6uM, 24 hours
3	3	60.2591		0.0820392	1.12401	8.44898	-0.832442									en71254	GSE145097_2_CPT 6uM, 24 hours_MCF7_CPT 6uM, 24 hours
3	3	100.432		0.109736	1.1406	6.31651	3.15633									en71266	GSE145097_2_CPT 6uM, 24 hours_MCF7_CPT 6uM, 24 hours
3	3	251.08		0.107338	1.14136	6.45762	2.75447									en71274	GSE145097_2_CPT 6uM, 24 hours_MCF7_CPT 6uM, 24 hours
3	3	20.0864		-0.119114	0.582147		7.22356									en71277	GSE145097_2_CPT 6uM, 24 hours_MCF7_CPT 6uM, 24 hours
3	3	70.3023		-0.00893914	0.894346		2.00673									en71278	GSE145097_2_CPT 6uM, 24 hours_MCF7_CPT 6uM, 24 hours
3	3	30.1296		-0.0604795	0.755449		4.40961									en71294	GSE145097_2_CPT 6uM, 24 hours_MCF7_CPT 6uM, 24 hours
3	3	30.1296		-0.197228	0.404328		9.04185									en71309	GSE145097_2_CPT 6uM, 24 hours_MCF7_CPT 6uM, 24 hours
3	3	50.2159		0.140286	1.35727	4.94095	-3.64818									en71310	GSE145097_2_CPT 6uM, 24 hours_MCF7_CPT 6uM, 24 hours
3	3	80.3455		0.339924	1.80729	2.03913	6.74817									en71328	GSE145097_2_CPT 6uM, 24 hours_MCF7_CPT 6uM, 24 hours
3	3	90.3887		-0.0310523	0.823858		3.67192									en71330	GSE145097_2_CPT 6uM, 24 hours_MCF7_CPT 6uM, 24 hours
3	3	120.518		0.0257316	1.05763	26.9376	-15.4115									en71396	GSE145097_2_CPT 6uM, 24 hours_MCF7_CPT 6uM, 24 hours
3	3	110.475		-0.116661	0.62674		5.89682									en71420	GSE145097_2_CPT 6uM, 24 hours_MCF7_CPT 6uM, 24 hours
3	3	140.605		-0.0605778	0.793456		2.33517									en71584	GSE145097_2_CPT 6uM, 24 hours_MCF7_CPT 6uM, 24 hours
3	3	20.0864		0.0370085	0.936059	18.7294	4.84016									en71589	GSE145097_2_CPT 6uM, 24 hours_MCF7_CPT 6uM, 24 hours
3	3	90.3887		0.570715	3.03489	1.21452	5.07645									en71590	GSE145097_2_CPT 6uM, 24 hours_MCF7_CPT 6uM, 24 hours
3	3	251.08		-0.136507	0.668073		2.49179									en71595	GSE145097_2_CPT 6uM, 24 hours_MCF7_CPT 6uM, 24 hours
3	3	40.1727		0.0293012	1.00688	23.6559	-0.971915									en71597	GSE145097_2_CPT 6uM, 24 hours_MCF7_CPT 6uM, 24 hours
3	3	20.0864		-0.119114	0.582147		7.22356									en71600	GSE145097_2_CPT 6uM, 24 hours_MCF7_CPT 6uM, 24 hours
3	3	230.993		-0.00570461	0.896024		2.31857									en71601	GSE145097_2_CPT 6uM, 24 hours_MCF7_CPT 6uM, 24 hours
3	3	80.3455		-0.232144	0.480517		5.56298									en71608	GSE145097_2_CPT 6uM, 24 hours_MCF7_CPT 6uM, 24 hours
3	3	70.3023		-0.0522365	0.743237		5.52725									en71609	GSE145097_2_CPT 6uM, 24 hours_MCF7_CPT 6uM, 24 hours
3	3	40.1727		0.0502463	0.878056	13.795	7.73388									en71610	GSE145097_2_CPT 6uM, 24 hours_MCF7_CPT 6uM, 24 hours
3	3	80.3455		0.112472	1.04916	6.16282	7.12968									en71614	GSE145097_2_CPT 6uM, 24 hours_MCF7_CPT 6uM, 24 hours
3	3	120.518		-0.10815	0.702346		3.05699									en71618	GSE145097_2_CPT 6uM, 24 hours_MCF7_CPT 6uM, 24 hours
3	3	30.1296		0.136047	1.28914	5.0949	-5.74566									en71623	GSE145097_2_CPT 6uM, 24 hours_MCF7_CPT 6uM, 24 hours
3	3	20.0864		0.233193	1.5518	2.97242	-1.93266									en71935	GSE145097_2_CPT 6uM, 24 hours_MCF7_CPT 6uM, 24 hours
3	3	20.0864		0.233193	1.5518	2.97242	-1.93266									en71937	GSE145097_2_CPT 6uM, 24 hours_MCF7_CPT 6uM, 24 hours
3	3	90.3887		0.039308	0.921663	17.6337	5.61475									en71940	GSE145097_2_CPT 6uM, 24 hours_MCF7_CPT 6uM, 24 hours
3	3	130.561		0.00847825	0.958321	81.7559	-0.410061									en71941	GSE145097_2_CPT 6uM, 24 hours_MCF7_CPT 6uM, 24 hours
3	3	70.3023		0.0269021	1.03927	25.7655	-8.21098									en72178	GSE145097_2_CPT 6uM, 24 hours_MCF7_CPT 6uM, 24 hours
3	3	30.1296		0.254387	1.70548	2.72478	-1.87751									en72185	GSE145097_2_CPT 6uM, 24 hours_MCF7_CPT 6uM, 24 hours
3	3	60.2591		0.0370085	0.936059	18.7294	4.84016									en72315	GSE145097_2_CPT 6uM, 24 hours_MCF7_CPT 6uM, 24 hours
3	3	40.1727		0.100654	1.21211	6.88641	-10.4425									en72317	GSE145097_2_CPT 6uM, 24 hours_MCF7_CPT 6uM, 24 hours
3	3	30.1296		0.0448882	0.895156	15.4416	6.91569									en72321	GSE145097_2_CPT 6uM, 24 hours_MCF7_CPT 6uM, 24 hours
3	3	90.3887		0.288182	1.78914	2.40524	-10.6291									en72472	GSE145097_2_CPT 6uM, 24 hours_MCF7_CPT 6uM, 24 hours
3	3	100.432		0.0413637	0.910646	16.7574	6.1695									en72474	GSE145097_2_CPT 6uM, 24 hours_MCF7_CPT 6uM, 24 hours
3	3	20.0864		0.0370085	0.936059	18.7294	4.84016									en72480	GSE145097_2_CPT 6uM, 24 hours_MCF7_CPT 6uM, 24 hours
3	3	90.3887		0.191815	1.52296	3.61362	-0.476707									en72508	GSE145097_2_CPT 6uM, 24 hours_MCF7_CPT 6uM, 24 hours
3	3	160.691		0.134507	1.26727	5.15325	-2.36878									en72743	GSE145097_2_CPT 6uM, 24 hours_MCF7_CPT 6uM, 24 hours
3	3	793.412		0.131487	1.2712	5.27162	-4.39032									en73075	GSE145097_2_CPT 6uM, 24 hours_MCF7_CPT 6uM, 24 hours
3	3	190.821		0.0175605	0.914075	39.472	3.95685									en73077	GSE145097_2_CPT 6uM, 24 hours_MCF7_CPT 6uM, 24 hours
3	3	612.634		0.0590962	1.14061	11.7291	-8.51691									en73078	GSE145097_2_CPT 6uM, 24 hours_MCF7_CPT 6uM, 24 hours
3	3	190.821		0.16307	1.3847	4.25062	-25.2095									en73079	GSE145097_2_CPT 6uM, 24 hours_MCF7_CPT 6uM, 24 hours
3	3	210.907		-0.0199682	0.899364		-0.137353									en73080	GSE145097_2_CPT 6uM, 24 hours_MCF7_CPT 6uM, 24 hours
3	3	60.2591		-0.142214	0.492633		8.66809									en73081	GSE145097_2_CPT 6uM, 24 hours_MCF7_CPT 6uM, 24 hours
3	3	2099.03		-0.00130603	0.950027		-1.70627									en73082	GSE145097_2_CPT 6uM, 24 hours_MCF7_CPT 6uM, 24 hours
3	3	230.993		-0.136612	0.629097		4.58462									en73155	GSE145097_2_CPT 6uM, 24 hours_MCF7_CPT 6uM, 24 hours
3	3	70.3023		-0.191252	0.437433		8.43956									en73156	GSE145097_2_CPT 6uM, 24 hours_MCF7_CPT 6uM, 24 hours
3	3	160.691		0.094543	1.04673	7.33156	5.722									en73157	GSE145097_2_CPT 6uM, 24 hours_MCF7_CPT 6uM, 24 hours
3	3	100.432		0.0281305	1.02189	24.6404	-3.34803									en73159	GSE145097_2_CPT 6uM, 24 hours_MCF7_CPT 6uM, 24 hours
3	3	170.734		0.0584132	1.11538	11.8663	-11.9574									en733	GSE145097_2_CPT 6uM, 24 hours_MCF7_CPT 6uM, 24 hours
3	3	30.1296		-0.217629	0.454669		7.08335									en73311	GSE145097_2_CPT 6uM, 24 hours_MCF7_CPT 6uM, 24 hours
3	3	80.3455		0.536003	2.88371	1.29318	-0.864698									en73404	GSE145097_2_CPT 6uM, 24 hours_MCF7_CPT 6uM, 24 hours
3	3	160.691		-0.0606393	0.821984		0.110736									en73405	GSE145097_2_CPT 6uM, 24 hours_MCF7_CPT 6uM, 24 hours
3	3	361.555		-0.00862349	0.859396		4.04473									en736	GSE145097_2_CPT 6uM, 24 hours_MCF7_CPT 6uM, 24 hours
3	3	40.1727		-0.253413	0.419163		6.92417									en73649	GSE145097_2_CPT 6uM, 24 hours_MCF7_CPT 6uM, 24 hours
3	3	20.0864		-0.48116	0.145689		9.75562									en73651	GSE145097_2_CPT 6uM, 24 hours_MCF7_CPT 6uM, 24 hours
3	3	70.3023		-0.0522365	0.743237		5.52725									en73652	GSE145097_2_CPT 6uM, 24 hours_MCF7_CPT 6uM, 24 hours
3	3	80.3455		0.0718408	1.07852	9.64838	1.17195									en73655	GSE145097_2_CPT 6uM, 24 hours_MCF7_CPT 6uM, 24 hours
3	3	50.2159		0.123586	1.1423	5.60864	4.8364									en737	GSE145097_2_CPT 6uM, 24 hours_MCF7_CPT 6uM, 24 hours
3	3	120.518		-0.271219	0.358131		8.18199									en73834	GSE145097_2_CPT 6uM, 24 hours_MCF7_CPT 6uM, 24 hours
3	3	30.1296		-0.142681	0.584803		6.01508									en73836	GSE145097_2_CPT 6uM, 24 hours_MCF7_CPT 6uM, 24 hours
3	3	100.432		0.0812949	1.01884	8.52633	5.56414									en73839	GSE145097_2_CPT 6uM, 24 hours_MCF7_CPT 6uM, 24 hours
3	3	291.252		-0.101642	0.745654		0.753621									en73848	GSE145097_2_CPT 6uM, 24 hours_MCF7_CPT 6uM, 24 hours
3	3	321.382		-0.0410758	0.775996		5.02603									en73850	GSE145097_2_CPT 6uM, 24 hours_MCF7_CPT 6uM, 24 hours
3	3	964.146		0.00144325	0.92593	480.27	1.20627									en73851	GSE145097_2_CPT 6uM, 24 hours_MCF7_CPT 6uM, 24 hours
3	3	70.3023		0.0269021	1.03927	25.7655	-8.21098									en73853	GSE145097_2_CPT 6uM, 24 hours_MCF7_CPT 6uM, 24 hours
[truncated: 133,206 more rows]

## Sheet: Table  S3a
By cell summary of eRNA half-lives for unpertubed control cells. This table summarizes the variability of half lives across cells/dataset
column details
set	ID to track the full time course where the sample is included
n	Number of eRNAs with measurable half life
Mean	Mean half life in hours
SD	Standard deviation of half lifes
Median	Median half life in hours
IQR_lower	Lower interqurtile range
IQR_upper	Higher interqurtile range
Min	Minimum half life
Max	Maximum half life
set	n	Mean	SD	Median	IQR_lower	IQR_upper	Min	Max
GSE77704_1_ctrl_NPC_ctrl	570	1.67132	3.00538	1.12303	0.618557	1.63435	0.0335892	54.1371
GSE197495_3_ctrl_Tcell_ctrl	734	5.3309	23.4817	1.25294	0.598997	3.18599	0.0119947	409.891
GSE197495_2_ctrl_Tcell_ctrl	663	5.339	21.1156	1.2909	0.614675	2.76783	0.0122095	318.852
GSE197495_1_ctrl_Tcell_ctrl	815	10.5537	172.096	1.32617	0.56665	2.94409	0.0115346	4891.89
GSE197495_1_ctrl_PrEC_ctrl	454	4.53449	14.3632	1.56415	0.800203	3.60311	0.0118255	254.191
GSE68611_1_ctrl_HEK 293_ctrl	291	3.35284	7.5568	1.76415	1.35811	3.08299	0.388393	116.278
GSE197495_2_ctrl_C4-2_ctrl	1149	6.55965	22.1928	1.80396	0.853556	4.16909	0.0129914	362.856
GSE197495_1_ctrl_C4-2_ctrl	1263	7.20741	36.6193	1.84884	0.943326	4.36348	0.0135064	591.293
GSE163945,GSE163964_1_ctrl_hPSC-PPC_ctrl	360	6.10328	19.8143	1.85424	1.13989	3.61187	0.0563316	209.191
GSE163945,GSE163964_2_ctrl_hPSC-PPC_ctrl	359	6.40025	25.9816	1.86826	1.15464	3.81583	0.0483408	335.123
GSE68611_2_ctrl_HEK 293_ctrl	413	5.04684	8.53351	2.36588	1.32169	8.015	0.425132	111.368
GSE60191_NA_ctrl_HeLa_ctrl	102	7.86776	16.3767	3.42924	2.16991	6.4178	0.11805	135.469
GSE59626_2_ctrl_HeLa_ctrl	1883	11.6539	32.295	3.65095	1.85692	7.3727	0.0547122	498.52
GSE145097_1_ctrl_MCF7_ctrl	39	7.84648	11.9811	4.00747	2.0048	6.48428	0.422423	49.5821
GSE145097_3_ctrl_MCF7_ctrl	40	6.81098	8.57977	4.03584	2.62051	6.55337	0.441388	42.1546
GSE145097_2_ctrl_MCF7_ctrl	29	6.75258	12.0156	4.14947	2.24029	7.83417	0.473842	67.1188
GSE90684_1_ctrl_HepG2_ctrl	1091	21.1411	143.814	4.28239	2.28134	8.98863	0.0516127	3854.64
GSE188690,GSE188694_1_ctrl_HeLa_ctrl	2107	11.717	34.7127	4.32747	2.59723	8.44008	0.106854	787.398
GSE90684_2_ctrl_HepG2_ctrl	1362	22.6814	139.457	4.74941	2.27023	10.6224	0.0498846	4080.12
GSE86549_NA_ctrl_U2OS_ctrl	722	16.0228	69.827	4.76798	2.52914	10.2493	0.145303	1466.25
GSE103872_2_ctrl_CCRF-CEM_ctrl	601	11.8691	26.9168	5.13528	3.12923	8.36822	0.676928	454.516
GSE103872_1_ctrl_CCRF-CEM_ctrl	843	12.1417	30.8908	5.15149	2.94055	9.23354	0.664061	261.187
GSE241147_2_ctrl_HepG2_ctrl	443	22.7592	136.307	5.2101	3.48844	10.4326	0.913854	2568.18
GSE241147_1_ctrl_HepG2_ctrl	403	12.6639	30.279	5.53086	3.37698	10.4938	1.07698	394.277
GSE49339_2_ctrl_HeLa_ctrl	1270	11.2432	24.6826	5.61973	3.50907	14.0827	0.982728	522.647
GSE218222_2_ctrl_U2OS_ctrl	2215	19.797	117.443	7.42968	4.3532	12.3462	1.09189	4916.77
GSE218222_1_ctrl_U2OS_ctrl	2035	27.4376	126.049	7.96004	4.74093	16.5518	0.752994	3291.62
