# Supplementary material
Source: HighWire-hosted journal article supplement (doi:10.1101/rna.080681.125)
Supplement: Supplemental_Table_S5.xlsx [file Supplemental_Table_S5.xlsx]

## Sheet: Table S5
Gene ontology enrichment analysis of target mRNAs stratified by eRNA stability class. This table contains the results of GO biological process enrichment analysis performed on predicted mRNA targets of eRNAs, grouped by their global stability class (short-lived, rest, or long-lived).
Cluster	group	ID	Description	GeneRatio	BgRatio	RichFactor	FoldEnrichment	zScore	pvalue	p.adjust	qvalue	geneID	Count
long	long	GO:0048588	developmental cell growth	22/461	232/18805	0.0948276	3.86818	6.96849	6.80674e-08	0.000270908	0.00024841	DCC/PRKG1/EFNA5/FLRT1/TNR/SLC23A2/SEMA5A/CYFIP2/APP/FGF13/FOXP1/TIAM1/SORBS2/PRKN/SHTN1/CDH4/PRKCZ/RIMS2/FSTL4/TSC22D4/HDAC6/DIP2B	22
long	long	GO:0060560	developmental growth involved in morphogenesis	21/461	238/18805	0.0882353	3.59927	6.39732	4.53928e-07	0.000903316	0.000828299	DCC/PRKG1/EFNA5/FLRT1/TNR/SLC23A2/SEMA5A/CYFIP2/APP/FGF13/TGFB1/TIAM1/PRKN/SHTN1/CDH4/PRKCZ/RIMS2/FSTL4/TSC22D4/HDAC6/DIP2B	21
long	long	GO:0007409	axonogenesis	30/461	459/18805	0.0653595	2.66613	5.72892	1.19889e-06	0.00159052	0.00145843	DCC/PRKG1/EFNA5/TNR/SEMA5A/NTRK2/CDH11/ROBO2/CYFIP2/APP/ARHGEF28/PALLD/NCAM1/CTNNA2/FGF13/NRXN1/TIAM1/ROBO1/CRPPA/ANK3/CHODL/SHTN1/CDH4/ATP8A2/NRXN3/CNTN4/FSTL4/HDAC6/DIP2B/POTEJ	30
long	long	GO:0010975	regulation of neuron projection development	29/461	448/18805	0.0647321	2.64054	5.57125	2.19175e-06	0.00191035	0.0017517	DCC/EFNA5/TNR/KDM1A/STAU2/DMD/SEMA5A/NTRK2/ROBO2/HECW2/TENM3/FLNA/CTNNA2/FGF13/TIAM1/PTPRD/ROBO1/RIT2/CHODL/SHTN1/MAGI2/CDH4/ATP8A2/FSTL4/PTPRG/HDAC6/PQBP1/ATF1/DIP2B	29
long	long	GO:0030900	forebrain development	27/461	413/18805	0.0653753	2.66677	5.42957	4.09986e-06	0.00271957	0.00249372	PRKG1/DLC1/TNR/KDM1A/MCPH1/FOXP2/TRAPPC9/ATRX/NDST1/SEMA5A/NTRK2/ROBO2/RARB/APP/LARGE1/FLNA/FGF13/FOXP1/PHACTR1/ERBB4/ROBO1/SKI/SRC/NRG3/CNTNAP2/OGDH/NOTCH2NLA	27
long	long	GO:0016049	cell growth	30/461	492/18805	0.0609756	2.4873	5.29945	4.87221e-06	0.0027702	0.00254015	DCC/PRKG1/TEAD1/EFNA5/FLRT1/TNR/SLC23A2/SEMA5A/CYFIP2/APP/SPHK2/PAK4/FGF13/TGFB1/ESR2/FOXP1/TIAM1/SORBS2/PRKN/NRG3/SHTN1/CDH4/PRKCZ/EPM2A/RIMS2/FSTL4/TSC22D4/H3-3A/HDAC6/DIP2B	30
long	long	GO:0022904	respiratory electron transport chain	13/461	117/18805	0.111111	4.53242	6.07592	5.95627e-06	0.00280769	0.00257452	MT-CO1/MT-CO3/MT-ND1/MT-ND4/MT-ND6/MT-CO2/IMMP2L/MT-CYB/MT-ND2/MT-ND5/SOD2/COX6A1/NDUFB10	13
long	long	GO:0031346	positive regulation of cell projection organization	24/461	360/18805	0.0666667	2.71945	5.22192	1.01555e-05	0.00404191	0.00370624	EFNA5/KDM1A/TENM2/STAU2/DMD/SEMA5A/NTRK2/ROBO2/TENM3/FLNA/TIAM1/PTPRD/ROBO1/SRC/RIT2/HTT/CHODL/SHTN1/MAGI2/CDH4/ATP8A2/TENM1/HDAC6/ATF1	24
long	long	GO:0007416	synapse assembly	20/461	273/18805	0.0732601	2.98841	5.24631	1.43917e-05	0.00473973	0.00434611	EFNA5/FLRT1/SDK1/GABRB2/STAU2/LRFN5/NTRK2/GABRG3/IL1RAPL2/ROBO2/CYFIP2/APP/LIN7A/LARGE1/ASIC2/FGF13/NRXN1/PTPRD/ERBB4/NRG3	20
long	long	GO:0009206	purine ribonucleoside triphosphate biosynthetic process	12/461	111/18805	0.108108	4.40992	5.71193	1.79364e-05	0.00473973	0.00434611	MT-ND1/MT-ND4/MT-ND6/SPHK2/TGFB1/MT-ND2/MT-ND5/ATP5F1B/LIPA/MT-ATP6/IMPDH1/NDUFB10	12
long	long	GO:0008038	neuron recognition	8/461	48/18805	0.166667	6.79863	6.37665	1.95832e-05	0.00473973	0.00434611	SEMA5A/ROBO2/APP/PALLD/ROBO1/OPCML/CNTNAP2/CNTN4	8
long	long	GO:0051960	regulation of nervous system development	27/461	454/18805	0.0594714	2.42594	4.8756	2.26269e-05	0.00473973	0.00434611	DCC/EFNA5/FLRT1/TNR/KDM1A/STAU2/SEMA5A/NTRK2/ROBO2/RARB/APP/ASIC2/FGF13/TGFB1/NRXN1/TIAM1/PTPRD/ROBO1/SKI/TENM4/CHODL/SHTN1/CDH4/FSTL4/HDAC6/DIP2B/RNF10	27
long	long	GO:0050905	neuromuscular process	14/461	176/18805	0.0795455	3.2448	4.74316	0.000115589	0.0153348	0.0140613	TNR/DMD/APP/LARGE1/CTNNA2/CAMTA1/NRXN1/PCDH15/CSMD1/PRKN/CNTNAP2/FGF12/ATP8A2/PNKD	14
long	long	GO:0019226	transmission of nerve impulse	9/461	78/18805	0.115385	4.70674	5.20037	0.000120556	0.0154778	0.0141924	TNR/CACNG2/NTRK2/SCN8A/KCNMB2/ANK3/HCN1/CNTNAP2/FGF12	9
long	long	GO:0022604	regulation of cell morphogenesis	17/461	247/18805	0.0688259	2.80753	4.53312	0.000134437	0.016249	0.0148996	EFNA5/SH3D19/SLC23A2/RASA1/STAU2/ARHGAP15/RDX/ZRANB1/MYO9A/FMNL2/TIAM1/PTPRD/PRKN/SRC/RIMS2/HDAC6/PARVA	17
long	long	GO:0050767	regulation of neurogenesis	22/461	372/18805	0.0591398	2.41242	4.36179	0.000139321	0.0163088	0.0149544	DCC/EFNA5/TNR/KDM1A/STAU2/SEMA5A/NTRK2/ROBO2/FGF13/TGFB1/TIAM1/PTPRD/ROBO1/SKI/TENM4/CHODL/SHTN1/CDH4/FSTL4/HDAC6/DIP2B/RNF10	22
long	long	GO:0046390	ribose phosphate biosynthetic process	14/461	180/18805	0.0777778	3.17269	4.64317	0.000146661	0.0166775	0.0152925	MT-ND1/MT-ND4/AK2/MT-ND6/SPHK2/TGFB1/MT-ND2/MT-ND5/ATP5F1B/LIPA/AK9/MT-ATP6/IMPDH1/NDUFB10	14
long	long	GO:0061387	regulation of extent of cell growth	10/461	99/18805	0.10101	4.12038	4.93473	0.000157984	0.0170582	0.0156415	DCC/EFNA5/TNR/SEMA5A/FGF13/SHTN1/CDH4/FSTL4/HDAC6/DIP2B	10
long	long	GO:0007612	learning	13/461	160/18805	0.08125	3.31433	4.6605	0.000162867	0.0170582	0.0156415	TNR/NTRK2/APP/FGF13/NRXN1/CSMD1/PRKN/TAFA2/HTT/CNTNAP2/NRXN3/ATXN1/EPM2A	13
long	long	GO:0048638	regulation of developmental growth	20/461	327/18805	0.0611621	2.49491	4.32304	0.000178217	0.0181873	0.0166769	DCC/EFNA5/TNR/SLC23A2/SEMA5A/APP/LIN7A/FGF13/FOXP1/ERBB4/PRKN/SHTN1/FTO/CDH4/ATP8A2/RIMS2/FSTL4/ZP3/HDAC6/DIP2B	20
long	long	GO:0098742	cell-cell adhesion via plasma-membrane adhesion molecules	18/461	280/18805	0.0642857	2.62233	4.33578	0.000202428	0.0201416	0.0184689	EFNA5/SDK1/LRFN5/CDH11/CDH13/ROBO2/CDH10/PTPRT/PALLD/TENM3/FAT1/NRXN1/PCDH15/PTPRD/ROBO1/TENM4/CDH4/CNTN4	18
long	long	GO:0042391	regulation of membrane potential	25/461	463/18805	0.0539957	2.20258	4.15345	0.000207563	0.0201488	0.0184755	GABRB2/DMD/PIP5KL1/CACNG2/NTRK2/KCNQ1/GABRG3/APP/SCN8A/FLNA/ASIC2/FGF13/KCNMB2/NRXN1/CTNNA3/PRKN/SRC/LIPA/ANK3/HCN1/FGF12/PRKCZ/INSYN1/RIMS2/SOD2	25
long	long	GO:1902600	proton transmembrane transport	14/461	190/18805	0.0736842	3.00571	4.40496	0.000257656	0.022978	0.0210698	MT-CO1/MT-CO3/MT-ND1/MT-ND4/MT-ND6/SPHK2/MT-CO2/MT-CYB/MT-ND2/MT-ND5/ATP5F1B/MT-ATP6/NDUFB10/ATP4A	14
long	long	GO:0035418	protein localization to synapse	9/461	88/18805	0.102273	4.17188	4.72791	0.000304496	0.022978	0.0210698	STAU2/CACNG2/ASIC2/DLG2/NRXN1/GPC6/ERBB4/PRKCZ/MAPK8IP3	9
long	long	GO:0050807	regulation of synapse organization	19/461	315/18805	0.0603175	2.46046	4.14385	0.000305989	0.022978	0.0210698	EFNA5/FLRT1/STAU2/TUBB/LRFN5/NTRK2/IL1RAPL2/ROBO2/CYFIP2/APP/PTPRT/LIN7A/FRMPD4/CTNNA2/ASIC2/NRXN1/TIAM1/PTPRD/CACNA2D3	19
long	long	GO:0009259	ribonucleotide metabolic process	21/461	371/18805	0.0566038	2.30897	4.03678	0.00035426	0.0251777	0.0230868	MT-ND1/MT-ND4/AK2/APP/RORA/DPYD/MT-ND6/SPHK2/DLG2/TGFB1/MT-ND2/MT-ND5/ATP5F1B/SRC/LIPA/MAGI3/AK9/OGDH/MT-ATP6/IMPDH1/NDUFB10	21
long	long	GO:0050803	regulation of synapse structure or activity	19/461	321/18805	0.05919	2.41447	4.05206	0.000386949	0.026473	0.0242745	EFNA5/FLRT1/STAU2/TUBB/LRFN5/NTRK2/IL1RAPL2/ROBO2/CYFIP2/APP/PTPRT/LIN7A/FRMPD4/CTNNA2/ASIC2/NRXN1/TIAM1/PTPRD/CACNA2D3	19
long	long	GO:0007158	neuron cell-cell adhesion	4/461	16/18805	0.25	10.1979	5.83482	0.000513292	0.03295	0.0302136	TNR/NRXN1/NRXN3/CNTN4	4
long	long	GO:0010970	transport along microtubule	13/461	181/18805	0.0718232	2.92979	4.13564	0.000540684	0.0331065	0.0303571	IFT43/STAU2/CCDC38/DYNC1H1/APP/DLG2/DST/CLIP3/HTT/PRKCZ/HDAC6/DYNLL1/MAPK8IP3	13
long	long	GO:0009205	purine ribonucleoside triphosphate metabolic process	16/461	254/18805	0.0629921	2.56956	3.99245	0.000562041	0.0338927	0.0310781	MT-ND1/MT-ND4/AK2/APP/MT-ND6/SPHK2/TGFB1/MT-ND2/MT-ND5/ATP5F1B/SRC/LIPA/OGDH/MT-ATP6/IMPDH1/NDUFB10	16
long	long	GO:0046034	ATP metabolic process	15/461	230/18805	0.0652174	2.66033	4.01627	0.000579267	0.0344095	0.0315519	MT-ND1/MT-ND4/AK2/APP/MT-ND6/SPHK2/TGFB1/MT-ND2/MT-ND5/ATP5F1B/SRC/LIPA/OGDH/MT-ATP6/NDUFB10	15
rest	rest	GO:0046034	ATP metabolic process	29/854	230/18805	0.126087	2.77642	5.91229	6.56195e-07	0.00244777	0.00235401	PID1/ADCY10/RPTOR/BCL2L13/MT-ND5/MT-ND4/PGK1/APP/MT-ND6/MT-ND3/ENO3/MT-ND1/MT-ATP8/PFKFB3/NDUFS6/ATP5PO/HSPA1A/HSPA1B/PGAM1/OGDH/FOXK2/PKM/DHTKD1/ACTN3/MT-ATP6/MT-ND2/IGF1/NADK/CTNS	29
rest	rest	GO:0009199	ribonucleoside triphosphate metabolic process	31/854	261/18805	0.118774	2.61539	5.732	1.0142e-06	0.00244777	0.00235401	PID1/ADCY10/RPTOR/BCL2L13/MT-ND5/MT-ND4/PGK1/APP/MT-ND6/MT-ND3/ENO3/MT-ND1/MT-ATP8/PFKFB3/NDUFS6/ATP5PO/HSPA1A/HSPA1B/PGAM1/OGDH/IMPDH1/FOXK2/PKM/UCK1/DHTKD1/ACTN3/MT-ATP6/MT-ND2/IGF1/NADK/CTNS	31
rest	rest	GO:0001964	startle response	8/854	28/18805	0.285714	6.2914	6.11148	2.41773e-05	0.0110356	0.0106129	CSMD1/MECP2/CTNNA2/GRID2/PRKN/GRIN2A/CNTNAP2/BACE1	8
rest	rest	GO:0006007	glucose catabolic process	8/854	28/18805	0.285714	6.2914	6.11148	2.41773e-05	0.0110356	0.0106129	ADCY10/BCL2L13/PGK1/ENO3/PGAM1/FOXK2/PKM/ACTN3	8
rest	rest	GO:0019693	ribose phosphate metabolic process	36/854	379/18805	0.0949868	2.0916	4.6825	2.51485e-05	0.0110356	0.0106129	PID1/ADCY10/RPTOR/BCL2L13/MT-ND5/MT-ND4/PDE4D/DLG2/PGK1/APP/ADSL/MT-ND6/MT-ND3/ENO3/MT-ND1/MT-ATP8/PFKFB3/NDUFS6/ATP5PO/HSPA1A/HSPA1B/PGAM1/OGDH/TPST1/IMPDH1/FOXK2/PKM/UCK1/DHTKD1/ACTN3/MT-ATP6/MT-ND2/IGF1/NADK/SULT1A3/CTNS	36
rest	rest	GO:0035176	social behavior	11/854	55/18805	0.2	4.40398	5.51414	3.03888e-05	0.0122239	0.0117557	RPTOR/NRXN3/EXT1/MECP2/NEGR1/KCNQ1/SHANK2/CNTNAP2/VPS13B/VPS13A/EIF4EBP2	11
rest	rest	GO:0051703	biological process involved in intraspecies interaction between organisms	11/854	57/18805	0.192982	4.24946	5.35896	4.31342e-05	0.0160161	0.0154026	RPTOR/NRXN3/EXT1/MECP2/NEGR1/KCNQ1/SHANK2/CNTNAP2/VPS13B/VPS13A/EIF4EBP2	11
rest	rest	GO:0019364	pyridine nucleotide catabolic process	15/854	101/18805	0.148515	3.27028	4.9898	4.933e-05	0.0170083	0.0163568	RPTOR/BCL2L13/PGK1/APP/SARM1/ENO3/PFKFB3/PGAM1/OGDH/FOXK2/PKM/DHTKD1/ACTN3/IGF1/NUDT17	15
rest	rest	GO:0006119	oxidative phosphorylation	19/854	151/18805	0.125828	2.77072	4.76498	5.56688e-05	0.0179142	0.017228	MT-CO1/BCL2L13/MT-CO2/MT-CO3/MT-ND5/MT-ND4/MT-ND6/MT-CYB/MT-ND3/ATP7A/MT-ND1/MT-ATP8/NDUFS6/ATP5PO/COX6C/SNCA/ACTN3/MT-ATP6/MT-ND2	19
rest	rest	GO:0072526	pyridine-containing compound catabolic process	15/854	104/18805	0.144231	3.17595	4.85336	6.97085e-05	0.0210302	0.0202246	RPTOR/BCL2L13/PGK1/APP/SARM1/ENO3/PFKFB3/PGAM1/OGDH/FOXK2/PKM/DHTKD1/ACTN3/IGF1/NUDT17	15
rest	rest	GO:0016553	base conversion or substitution editing	6/854	18/18805	0.333333	7.33997	5.86954	9.99809e-05	0.0283887	0.0273013	ADARB2/ADAR/APOBEC3C/APOBEC3A/APOBEC3D/APOBEC3B	6
rest	rest	GO:0031338	regulation of vesicle fusion	8/854	35/18805	0.228571	5.03312	5.20898	0.000138045	0.0331393	0.0318699	SYT11/ANXA2/ERC2/PRRT2/SNCA/CORO1A/DOC2A/GRIK5	8
rest	rest	GO:0061621	canonical glycolysis	6/854	19/18805	0.315789	6.95365	5.66308	0.000140532	0.0331393	0.0318699	BCL2L13/PGK1/ENO3/PGAM1/FOXK2/PKM	6
short	short	GO:0019646	aerobic electron transport chain	8/255	93/18805	0.0860215	6.34366	6.05681	3.86209e-05	0.0396083	0.0388703	NDUFS2/SDHC/MT-ND6/MT-ND5/MTCO2P12/UQCRC2/MT-CO3/MT-CO2	8
short	short	GO:0006361	transcription initiation at RNA polymerase I promoter	4/255	16/18805	0.25	18.4363	8.1806	5.28662e-05	0.0396083	0.0388703	RRN3/RRN3P1/RRN3P2/UBTFL6	4
short	short	GO:0042775	mitochondrial ATP synthesis coupled electron transport	8/255	101/18805	0.0792079	5.8412	5.71965	6.98313e-05	0.0396083	0.0388703	NDUFS2/SDHC/MT-ND6/MT-ND5/MTCO2P12/UQCRC2/MT-CO3/MT-CO2	8
