# Supplementary material
Source: HighWire-hosted journal article supplement (doi:10.1101/rna.080681.125)
Supplement: Supplemental_Table_S6.xlsx [file Supplemental_Table_S6.xlsx]

## Sheet: Table S6
Gene ontology enrichment analysis of target mRNAs stratified by eRNA stability class and excluding those with geneomic DNA interactions through TAD.
Cluster	group	ID	Description	GeneRatio	BgRatio	RichFactor	FoldEnrichment	zScore	pvalue	p.adjust	qvalue	geneID	Count
long	long	GO:0048588	developmental cell growth	21/422	232/18805	0.0905172	4.03359	7.04423	6.78781e-08	0.00026486	0.000239645	DCC/PRKG1/EFNA5/FLRT1/TNR/SLC23A2/SEMA5A/CYFIP2/APP/FGF13/FOXP1/TIAM1/SORBS2/PRKN/SHTN1/CDH4/PRKCZ/RIMS2/FSTL4/HDAC6/DIP2B	21
long	long	GO:0007409	axonogenesis	30/422	459/18805	0.0653595	2.91252	6.28515	1.85818e-07	0.00036253	0.000328017	DCC/PRKG1/EFNA5/TNR/SEMA5A/NTRK2/CDH11/ROBO2/CYFIP2/APP/ARHGEF28/PALLD/NCAM1/CTNNA2/FGF13/NRXN1/TIAM1/ROBO1/CRPPA/ANK3/CHODL/SHTN1/CDH4/ATP8A2/NRXN3/CNTN4/FSTL4/HDAC6/DIP2B/POTEJ	30
long	long	GO:0060560	developmental growth involved in morphogenesis	20/422	238/18805	0.0840336	3.74467	6.45627	4.64216e-07	0.000603791	0.000546309	DCC/PRKG1/EFNA5/FLRT1/TNR/SLC23A2/SEMA5A/CYFIP2/APP/FGF13/TGFB1/TIAM1/PRKN/SHTN1/CDH4/PRKCZ/RIMS2/FSTL4/HDAC6/DIP2B	20
long	long	GO:0030900	forebrain development	26/422	413/18805	0.062954	2.80533	5.6207	2.47991e-06	0.00191079	0.00172889	PRKG1/DLC1/TNR/KDM1A/MCPH1/FOXP2/TRAPPC9/ATRX/NDST1/SEMA5A/NTRK2/ROBO2/RARB/APP/LARGE1/FLNA/FGF13/FOXP1/PHACTR1/ERBB4/ROBO1/SKI/SRC/NRG3/CNTNAP2/NOTCH2NLA	26
long	long	GO:0010975	regulation of neuron projection development	27/422	448/18805	0.0602679	2.68563	5.4711	3.60006e-06	0.00191079	0.00172889	DCC/EFNA5/TNR/KDM1A/STAU2/DMD/SEMA5A/NTRK2/ROBO2/HECW2/TENM3/FLNA/CTNNA2/FGF13/TIAM1/PTPRD/ROBO1/RIT2/CHODL/SHTN1/MAGI2/CDH4/ATP8A2/FSTL4/PTPRG/HDAC6/DIP2B	27
long	long	GO:0007416	synapse assembly	20/422	273/18805	0.0732601	3.26459	5.71061	3.91757e-06	0.00191079	0.00172889	EFNA5/FLRT1/SDK1/GABRB2/STAU2/LRFN5/NTRK2/GABRG3/IL1RAPL2/ROBO2/CYFIP2/APP/LIN7A/LARGE1/ASIC2/FGF13/NRXN1/PTPRD/ERBB4/NRG3	20
long	long	GO:0016049	cell growth	28/422	492/18805	0.0569106	2.53603	5.23088	7.03476e-06	0.00290355	0.00262713	DCC/PRKG1/TEAD1/EFNA5/FLRT1/TNR/SLC23A2/SEMA5A/CYFIP2/APP/SPHK2/PAK4/FGF13/TGFB1/ESR2/FOXP1/TIAM1/SORBS2/PRKN/NRG3/SHTN1/CDH4/PRKCZ/EPM2A/RIMS2/FSTL4/HDAC6/DIP2B	28
long	long	GO:0031346	positive regulation of cell projection organization	23/422	360/18805	0.0638889	2.84699	5.36105	7.44119e-06	0.00290355	0.00262713	EFNA5/KDM1A/TENM2/STAU2/DMD/SEMA5A/NTRK2/ROBO2/TENM3/FLNA/TIAM1/PTPRD/ROBO1/SRC/RIT2/HTT/CHODL/SHTN1/MAGI2/CDH4/ATP8A2/TENM1/HDAC6	23
long	long	GO:0008038	neuron recognition	8/422	48/18805	0.166667	7.42694	6.75485	1.03439e-05	0.00366927	0.00331995	SEMA5A/ROBO2/APP/PALLD/ROBO1/OPCML/CNTNAP2/CNTN4	8
long	long	GO:0051960	regulation of nervous system development	26/422	454/18805	0.0572687	2.55199	5.07177	1.3441e-05	0.00437056	0.00395448	DCC/EFNA5/FLRT1/TNR/KDM1A/STAU2/SEMA5A/NTRK2/ROBO2/RARB/APP/ASIC2/FGF13/TGFB1/NRXN1/TIAM1/PTPRD/ROBO1/SKI/TENM4/CHODL/SHTN1/CDH4/FSTL4/HDAC6/DIP2B	26
long	long	GO:0050905	neuromuscular process	14/422	176/18805	0.0795455	3.54467	5.13886	4.51277e-05	0.0111696	0.0101062	TNR/DMD/APP/LARGE1/CTNNA2/CAMTA1/NRXN1/PCDH15/CSMD1/PRKN/CNTNAP2/FGF12/ATP8A2/PNKD	14
long	long	GO:0022604	regulation of cell morphogenesis	17/422	247/18805	0.0688259	3.06699	4.95445	4.58004e-05	0.0111696	0.0101062	EFNA5/SH3D19/SLC23A2/RASA1/STAU2/ARHGAP15/RDX/ZRANB1/MYO9A/FMNL2/TIAM1/PTPRD/PRKN/SRC/RIMS2/HDAC6/PARVA	17
long	long	GO:0042391	regulation of membrane potential	25/422	463/18805	0.0539957	2.40613	4.64159	5.17994e-05	0.0116895	0.0105767	GABRB2/DMD/PIP5KL1/CACNG2/NTRK2/KCNQ1/GABRG3/APP/SCN8A/FLNA/ASIC2/FGF13/KCNMB2/NRXN1/CTNNA3/PRKN/SRC/LIPA/ANK3/HCN1/FGF12/PRKCZ/INSYN1/RIMS2/SOD2	25
long	long	GO:0048638	regulation of developmental growth	20/422	327/18805	0.0611621	2.72548	4.76903	5.3924e-05	0.0116895	0.0105767	DCC/EFNA5/TNR/SLC23A2/SEMA5A/APP/LIN7A/FGF13/FOXP1/ERBB4/PRKN/SHTN1/FTO/CDH4/ATP8A2/RIMS2/FSTL4/ZP3/HDAC6/DIP2B	20
long	long	GO:0019226	transmission of nerve impulse	9/422	78/18805	0.115385	5.14172	5.55351	6.14901e-05	0.0119763	0.0108362	TNR/CACNG2/NTRK2/SCN8A/KCNMB2/ANK3/HCN1/CNTNAP2/FGF12	9
long	long	GO:0022904	respiratory electron transport chain	11/422	117/18805	0.0940171	4.18955	5.24342	6.5641e-05	0.0119763	0.0108362	MT-CO1/MT-CO3/MT-ND1/MT-ND4/MT-ND6/MT-CO2/IMMP2L/MT-CYB/MT-ND2/MT-ND5/SOD2	11
long	long	GO:0098742	cell-cell adhesion via plasma-membrane adhesion molecules	18/422	280/18805	0.0642857	2.86468	4.76295	6.71057e-05	0.0119763	0.0108362	EFNA5/SDK1/LRFN5/CDH11/CDH13/ROBO2/CDH10/PTPRT/PALLD/TENM3/FAT1/NRXN1/PCDH15/PTPRD/ROBO1/TENM4/CDH4/CNTN4	18
long	long	GO:0007612	learning	13/422	160/18805	0.08125	3.62063	5.0438	6.75243e-05	0.0119763	0.0108362	TNR/NTRK2/APP/FGF13/NRXN1/CSMD1/PRKN/TAFA2/HTT/CNTNAP2/NRXN3/ATXN1/EPM2A	13
long	long	GO:0061387	regulation of extent of cell growth	10/422	99/18805	0.10101	4.50117	5.29193	7.65624e-05	0.012989	0.0117524	DCC/EFNA5/TNR/SEMA5A/FGF13/SHTN1/CDH4/FSTL4/HDAC6/DIP2B	10
long	long	GO:0006754	ATP biosynthetic process	10/422	100/18805	0.1	4.45616	5.25035	8.33962e-05	0.0131356	0.0118851	MT-ND1/MT-ND4/MT-ND6/SPHK2/TGFB1/MT-ND2/MT-ND5/ATP5F1B/LIPA/MT-ATP6	10
long	long	GO:0050807	regulation of synapse organization	19/422	315/18805	0.0603175	2.68784	4.57712	9.90943e-05	0.0143756	0.013007	EFNA5/FLRT1/STAU2/TUBB/LRFN5/NTRK2/IL1RAPL2/ROBO2/CYFIP2/APP/PTPRT/LIN7A/FRMPD4/CTNNA2/ASIC2/NRXN1/TIAM1/PTPRD/CACNA2D3	19
long	long	GO:0050767	regulation of neurogenesis	21/422	372/18805	0.0564516	2.51557	4.47326	0.000110661	0.0143756	0.013007	DCC/EFNA5/TNR/KDM1A/STAU2/SEMA5A/NTRK2/ROBO2/FGF13/TGFB1/TIAM1/PTPRD/ROBO1/SKI/TENM4/CHODL/SHTN1/CDH4/FSTL4/HDAC6/DIP2B	21
long	long	GO:0050803	regulation of synapse structure or activity	19/422	321/18805	0.05919	2.6376	4.4837	0.000126775	0.0149902	0.0135632	EFNA5/FLRT1/STAU2/TUBB/LRFN5/NTRK2/IL1RAPL2/ROBO2/CYFIP2/APP/PTPRT/LIN7A/FRMPD4/CTNNA2/ASIC2/NRXN1/TIAM1/PTPRD/CACNA2D3	19
long	long	GO:0007158	neuron cell-cell adhesion	4/422	16/18805	0.25	11.1404	6.14804	0.0003673	0.031849	0.0288169	TNR/NRXN1/NRXN3/CNTN4	4
long	long	GO:1901888	regulation of cell junction assembly	16/422	270/18805	0.0592593	2.64069	4.11419	0.000420121	0.0335797	0.0303829	EFNA5/FLRT1/DLC1/STAU2/LRFN5/NTRK2/IL1RAPL2/ROBO2/CYFIP2/APP/LIN7A/ASIC2/NRXN1/PTPRD/SRC/CNTNAP2	16
long	long	GO:0032535	regulation of cellular component size	19/422	353/18805	0.0538244	2.3985	4.01885	0.000421682	0.0335797	0.0303829	DCC/EFNA5/TNR/KDM1A/RASA1/CYRIA/SEMA5A/CYFIP2/FGF13/RDX/SHTN1/CDH4/SVIL/TENM1/FSTL4/ATP13A2/HDAC6/WASHC2C/DIP2B	19
long	long	GO:0009260	ribonucleotide biosynthetic process	12/422	173/18805	0.0693642	3.09098	4.18616	0.000550103	0.0390273	0.0353119	MT-ND1/MT-ND4/AK2/MT-ND6/SPHK2/TGFB1/MT-ND2/MT-ND5/ATP5F1B/LIPA/AK9/MT-ATP6	12
long	long	GO:0086001	cardiac muscle cell action potential	8/422	85/18805	0.0941176	4.19403	4.47166	0.000640999	0.0438803	0.0397029	DMD/KCNQ1/SCN8A/FLNA/FGF13/CTNNA3/ANK3/FGF12	8
long	long	GO:0046390	ribose phosphate biosynthetic process	12/422	180/18805	0.0666667	2.97077	4.0253	0.000781879	0.0494385	0.0447319	MT-ND1/MT-ND4/AK2/MT-ND6/SPHK2/TGFB1/MT-ND2/MT-ND5/ATP5F1B/LIPA/AK9/MT-ATP6	12
long	long	GO:0099560	synaptic membrane adhesion	5/422	33/18805	0.151515	6.75176	5.01044	0.000785543	0.0494385	0.0447319	EFNA5/LRFN5/CDH10/PTPRD/TENM4	5
long	long	GO:0035418	protein localization to synapse	8/422	88/18805	0.0909091	4.05106	4.34657	0.000807734	0.0495941	0.0448727	STAU2/CACNG2/ASIC2/DLG2/NRXN1/GPC6/ERBB4/PRKCZ	8
long	long	GO:0007015	actin filament organization	22/422	463/18805	0.0475162	2.1174	3.68849	0.00082892	0.0497607	0.0450234	DLC1/RASA1/CALD1/CYRIA/SEMA5A/CYFIP2/FLNA/FAT1/CTNNA2/RDX/WIPF1/PAWR/PHACTR1/PRKN/SRC/MYO5B/SHTN1/SVIL/TENM1/TPM4/HDAC6/WASHC2C	22
rest	rest	GO:0001964	startle response	8/611	28/18805	0.285714	8.79355	7.5628	2.07406e-06	0.00902838	0.00856914	CSMD1/MECP2/CTNNA2/GRID2/PRKN/GRIN2A/CNTNAP2/BACE1	8
rest	rest	GO:0046034	ATP metabolic process	22/611	230/18805	0.0956522	2.94393	5.43577	6.45231e-06	0.0108871	0.0103333	PID1/ADCY10/RPTOR/BCL2L13/MT-ND5/MT-ND4/PGK1/APP/MT-ND6/MT-ND3/ENO3/MT-ND1/MT-ATP8/PFKFB3/NDUFS6/PGAM1/FOXK2/PKM/MT-ATP6/MT-ND2/NADK/CTNS	22
rest	rest	GO:0035176	social behavior	10/611	55/18805	0.181818	5.59589	6.25507	9.52651e-06	0.0108871	0.0103333	RPTOR/NRXN3/EXT1/MECP2/NEGR1/KCNQ1/SHANK2/CNTNAP2/VPS13A/EIF4EBP2	10
rest	rest	GO:0007005	mitochondrion organization	33/611	445/18805	0.0741573	2.28237	5.01694	1.00042e-05	0.0108871	0.0103333	PID1/BCL2L13/LONP1/MT-ND5/MT-ND4/FEZ1/UQCC6/IFIT2/COX19/MT-ND6/ADCK1/ATP7A/PRKN/MT-ND1/COX20/CERT1/AP3B1/FASTKD3/RCC1L/NDUFAF6/HIGD1C/SNCA/HDAC6/USP30/MT-ND2/SOD2/VPS13A/ATAD3C/ATAD3A/ATAD3B/MPV17L/ATP2A1/APOOL	33
rest	rest	GO:0051703	biological process involved in intraspecies interaction between organisms	10/611	57/18805	0.175439	5.39955	6.09606	1.32674e-05	0.0115506	0.0109631	RPTOR/NRXN3/EXT1/MECP2/NEGR1/KCNQ1/SHANK2/CNTNAP2/VPS13A/EIF4EBP2	10
rest	rest	GO:0061621	canonical glycolysis	6/611	19/18805	0.315789	9.71918	6.96814	2.16944e-05	0.0121627	0.011544	BCL2L13/PGK1/ENO3/PGAM1/FOXK2/PKM	6
rest	rest	GO:0061718	glucose catabolic process to pyruvate	6/611	19/18805	0.315789	9.71918	6.96814	2.16944e-05	0.0121627	0.011544	BCL2L13/PGK1/ENO3/PGAM1/FOXK2/PKM	6
rest	rest	GO:0009205	purine ribonucleoside triphosphate metabolic process	22/611	254/18805	0.0866142	2.66576	4.8981	3.06577e-05	0.0121627	0.011544	PID1/ADCY10/RPTOR/BCL2L13/MT-ND5/MT-ND4/PGK1/APP/MT-ND6/MT-ND3/ENO3/MT-ND1/MT-ATP8/PFKFB3/NDUFS6/PGAM1/FOXK2/PKM/MT-ATP6/MT-ND2/NADK/CTNS	22
rest	rest	GO:0009150	purine ribonucleotide metabolic process	27/611	350/18805	0.0771429	2.37426	4.75584	3.21698e-05	0.0121627	0.011544	PID1/ADCY10/RPTOR/BCL2L13/MT-ND5/MT-ND4/PDE4D/DLG2/PGK1/APP/ADSL/MT-ND6/MT-ND3/ENO3/MT-ND1/MT-ATP8/PFKFB3/NDUFS6/PGAM1/TPST1/FOXK2/PKM/MT-ATP6/MT-ND2/NADK/SULT1A3/CTNS	27
rest	rest	GO:0006119	oxidative phosphorylation	16/611	151/18805	0.10596	3.26118	5.11234	3.3529e-05	0.0121627	0.011544	MT-CO1/BCL2L13/MT-CO2/MT-CO3/MT-ND5/MT-ND4/MT-ND6/MT-CYB/MT-ND3/ATP7A/MT-ND1/MT-ATP8/NDUFS6/SNCA/MT-ATP6/MT-ND2	16
rest	rest	GO:0019646	aerobic electron transport chain	12/611	93/18805	0.129032	3.97128	5.26389	4.69005e-05	0.0127599	0.0121108	MT-CO1/MT-CO2/MT-CO3/MT-ND5/MT-ND4/MT-ND6/MT-CYB/MT-ND3/MT-ND1/NDUFS6/SNCA/MT-ND2	12
rest	rest	GO:1902600	proton transmembrane transport	18/611	190/18805	0.0947368	2.91576	4.8637	4.99276e-05	0.0127844	0.0121341	MT-CO1/MT-CO2/MT-CO3/MT-ND5/MT-ND4/SLC9A3/MT-ND6/MT-CYB/ATP1A3/MT-ND3/MT-ND1/MT-ATP8/NDUFS6/MT-ATP6/MT-ND2/SLC17A5/CTNS/SLC25A12	18
rest	rest	GO:0019693	ribose phosphate metabolic process	27/611	379/18805	0.0712401	2.19259	4.29809	0.000124068	0.0216027	0.0205039	PID1/ADCY10/RPTOR/BCL2L13/MT-ND5/MT-ND4/PDE4D/DLG2/PGK1/APP/ADSL/MT-ND6/MT-ND3/ENO3/MT-ND1/MT-ATP8/PFKFB3/NDUFS6/PGAM1/TPST1/FOXK2/PKM/MT-ATP6/MT-ND2/NADK/SULT1A3/CTNS	27
rest	rest	GO:0050905	neuromuscular process	16/611	176/18805	0.0909091	2.79795	4.39157	0.000208057	0.033029	0.0313489	CSMD1/MECP2/APP/CTNNA2/MYO7A/SPART/GRID2/PRKN/PRRT2/ANKFN1/DMD/GRIN2A/CNTNAP2/BACE1/VPS13A/ATP2A1	16
rest	rest	GO:0010310	regulation of hydrogen peroxide metabolic process	5/611	18/18805	0.277778	8.54928	5.87212	0.000214686	0.033029	0.0313489	SNCA/HDAC6/SOD2/MPV17L/CTNS	5
rest	rest	GO:0098974	postsynaptic actin cytoskeleton organization	5/611	18/18805	0.277778	8.54928	5.87212	0.000214686	0.033029	0.0313489	ACTBL2/FARP1/POTEJ/POTEI/POTEF	5
rest	rest	GO:0007626	locomotory behavior	18/611	215/18805	0.0837209	2.57671	4.26102	0.000241144	0.03499	0.0332101	ZFHX3/LSAMP/MECP2/APP/NEGR1/RNF170/DAB1/ATP7A/ASTN1/PRKN/SHANK2/ANKFN1/ASL/SNCA/SOD2/VPS13A/NTAN1/CTNS	18
rest	rest	GO:0006734	NADH metabolic process	7/611	40/18805	0.175	5.38605	5.08874	0.000270774	0.0368338	0.0349602	BCL2L13/PGK1/ENO3/PGAM1/FOXK2/PKM/SLC25A12	7
rest	rest	GO:0042776	proton motive force-driven mitochondrial ATP synthesis	9/611	68/18805	0.132353	4.07348	4.65282	0.000339177	0.0434246	0.0412157	MT-ND5/MT-ND4/MT-ND6/MT-ND3/MT-ND1/MT-ATP8/NDUFS6/MT-ATP6/MT-ND2	9
rest	rest	GO:0008344	adult locomotory behavior	10/611	84/18805	0.119048	3.66398	4.48422	0.000386919	0.0481217	0.0456739	MECP2/APP/RNF170/DAB1/PRKN/SHANK2/SNCA/VPS13A/NTAN1/CTNS	10
short	short	GO:0006119	oxidative phosphorylation	9/127	151/18805	0.0596026	8.82542	7.96107	8.64987e-07	0.00101262	0.000960598	NDUFS2/SDHC/VCP/MT-ND6/MT-ND5/MTCO2P12/MT-CO3/MT-ATP6/MT-CO2	9
short	short	GO:0009060	aerobic respiration	10/127	201/18805	0.0497512	7.36671	7.48293	1.09948e-06	0.00101262	0.000960598	NDUFS2/SDHC/VCP/MT-ND6/MT-ND5/MTCO2P12/BNIP3/MT-CO3/MT-ATP6/MT-CO2	10
short	short	GO:0006754	ATP biosynthetic process	6/127	100/18805	0.06	8.88425	6.51844	5.97997e-05	0.012239	0.0116102	NDUFS2/SDHC/VCP/MT-ND6/MT-ND5/MT-ATP6	6
short	short	GO:0060816	random inactivation of X chromosome	3/127	14/18805	0.214286	31.7295	9.48431	0.000103701	0.0159211	0.0151032	BRCA1/CDYL/XIST	3
short	short	GO:1902600	proton transmembrane transport	7/127	190/18805	0.0368421	5.45524	5.08954	0.000309895	0.0317126	0.0300834	NDUFS2/MT-ND6/MT-ND5/MTCO2P12/MT-CO3/MT-ATP6/MT-CO2	7
