# Supplementary material
Source: HighWire-hosted journal article supplement (doi:10.1101/rna.080681.125)
Supplement: Supplemental_Table_S7.xlsx [file Supplemental_Table_S7.xlsx]

## Sheet: Table S7
eRNAs with significant predicted effects on target mRNA stability and associated translation efficiency. This table lists regulatory eRNA–mRNA pairs in which the half-life (HF) of the eRNA significantly predicts the stability of its mRNA target (FDR < 0.05). For each pair, changes in translation efficiency (TE) of the target mRNA were also assessed using ribosome profiling data.
column details
pair	eRNA-mRNA pair IDs
A0.hf	Average half life for the low eRNA half life group
High.hf	Average half life for the high eRNA half life group
sig.hf	Half life association significance at FDR < 0.05
trend.hf	Direction of association between eRNA and mRNA target relative to the low group for half life association
A0.te	Average translation efficiency for the low eRNA half life group
High.te	Average translation efficiency for the high eRNA half life group
trend.te	Translation efficiency association significance at FDR < 0.05
sig.te	Direction of association between eRNA and mRNA target relative to the low group for translation efficiency association
hf	Half life association group
te	Translation efficiency association group
pair	A0.hf	High.hf	sig.hf	trend.hf	A0.te	High.te	trend.te	sig.te	hf	te
en100105_GCNT1	2.88838	28.5464	sig	Increasing		0.73282			stabilise	noData
en10053_SIN3A	1.9549	6.20174	sig	Increasing	0.941234	1.06055	Increasing	sig	stabilise	enhance
en100550_TGFB1	18.0229	52.3489	sig	Increasing	0.940627	1.06008	Increasing	no	stabilise	neutral
en101295_GTSE1	10.5456	42.0015	sig	Increasing		1.03279			stabilise	noData
en105576_STK24	7.66495	2.98426	sig	Decreasing	0.758484	0.814089	Increasing	no	destabilise	neutral
en106588_C9orf85	7.64289	42.0892	sig	Increasing	1.24043	1.01989	Decreasing	sig	stabilise	neutral
en106591_C9orf85	7.29108	13.5179	sig	Increasing		1.12424			stabilise	noData
en107220_EIF3A	8.57269	30.4851	sig	Increasing		1.25964			stabilise	noData
en109148_CSNK1D	8.97964	32.883	sig	Increasing	1.37118	1.66379	Increasing	sig	stabilise	enhance
en109148_GCNT1	2.80442	6.6726	sig	Increasing	0.717382	0.649647	Decreasing	no	stabilise	neutral
en109148_GPRC5D	4.18749	18.828	sig	Increasing	0	0		no	stabilise	neutral
en109148_MEPCE	2.14356	4.71995	sig	Increasing	0.622585	0.690291	Increasing	sig	stabilise	enhance
en109148_ZNF394	3.15423	11.4108	sig	Increasing	0.481413	0.519156	Increasing	no	stabilise	neutral
en110088_ZNF70	3.15683	7.41832	sig	Increasing	0.634437	0.711632	Increasing	sig	stabilise	enhance
en110136_GGT5	5.69023	45.8553	sig	Increasing	0.0100118	0	Decreasing	no	stabilise	neutral
en110136_SUSD2	23.2967	7.46543	sig	Decreasing	1.26877	1.11098	Decreasing	sig	destabilise	suppress
en110139_GGT5	6.44095	43.472	sig	Increasing	0.449927	1.18362	Increasing	sig	stabilise	enhance
en113476_ARHGAP28	4.37739	9.93656	sig	Increasing	0.742149	0.929283	Increasing	sig	stabilise	enhance
en113565_UBP1	11.3059	41.9667	sig	Increasing		0.343376			stabilise	noData
en113566_UBP1	11.1863	40.3056	sig	Increasing		0.343073			stabilise	noData
en114700_CDC25A	2.69183	6.26869	sig	Increasing		0.865026			stabilise	noData
en114700_DHX30	8.26976	85.667	sig	Increasing		0.727897			stabilise	noData
en114700_ZNF589	5.27019	18.3921	sig	Increasing		0.672036			stabilise	noData
en119213_CLDN18	5.69223	8.80166	sig	Increasing	0	0		sig	stabilise	noData
en120065_GPSM2	17.3199	405.858	sig	Increasing		0.522652			stabilise	noData
en120119_UBASH3B	7.38626	17.0396	sig	Increasing	0.68051	0.720255	Increasing	no	stabilise	neutral
en121896_ST6GAL1	8.02264	14.9033	sig	Increasing	0.942264	1.05575	Increasing	no	stabilise	neutral
en123939_SLCO5A1	2.883	1.68618	sig	Decreasing	0.212444	0.277181	Increasing	no	destabilise	neutral
en126692_HERC6	9.03386	34.135	sig	Increasing		1.15094			stabilise	noData
en127642_SEC24B	2.43641	11.3513	sig	Increasing	1.01035	1.00162	Decreasing	no	stabilise	neutral
en127643_SEC24B	2.71542	14.4991	sig	Increasing		1.0032			stabilise	noData
en129407_RYR2	33.1478	0.366433	sig	Decreasing	0.415142	0.24422	Decreasing	sig	destabilise	suppress
en129425_GCNT1	2.81573	4.27709	sig	Increasing	0.675909	0.717039	Increasing	no	stabilise	neutral
en129631_NRF1	2.15916	6.25918	sig	Increasing	1.15145	1.05328	Decreasing	sig	stabilise	neutral
en133250_NAIP	3.0959	17.8023	sig	Increasing		0.510428			stabilise	noData
en133356_ATP8A2	5.09212	74.869	sig	Increasing	0.725017	0	Decreasing	sig	stabilise	neutral
en134769_PHC2	5.698	19.7214	sig	Increasing	0.579477	0.637597	Increasing	sig	stabilise	enhance
en135419_CELF1	7.50865	25.8563	sig	Increasing	1.61628	1.58915	Decreasing	no	stabilise	neutral
en135504_MARCHF3	4.28376	5.8787	sig	Increasing	0.512853	0.482393	Decreasing	no	stabilise	neutral
en135505_MARCHF3	4.4436	6.74505	sig	Increasing	0.548003	0.485583	Decreasing	no	stabilise	neutral
en135506_MARCHF3	4.41082	8.94113	sig	Increasing	0.543091	0.482393	Decreasing	sig	stabilise	neutral
en136752_SCGB3A2	12.8709	106.683	sig	Increasing	0	0		sig	stabilise	noData
en139250_SIRT5	26.2646	267.052	sig	Increasing		0.827654			stabilise	noData
en139823_ABT1	5.6452	3.3155	sig	Decreasing		0.999765			destabilise	noData
en139838_MT-ND6	4.67244	8.57816	sig	Increasing	0	0			stabilise	noData
en141715_UBR2	6.97574	14.8703	sig	Increasing	0.997443	0.931004	Decreasing	sig	stabilise	neutral
en142850_VGLL4	7.08888	150.415	sig	Increasing	1.38812	1.23153	Decreasing	sig	stabilise	neutral
en151234_VKORC1L1	12.3535	62.6304	sig	Increasing		1.38751			stabilise	noData
en153021_RBM4B	6.43706	10.117	sig	Increasing	1.02442	0.909053	Decreasing	sig	stabilise	neutral
en154803_SLCO5A1	2.59465	14.1291	sig	Increasing	0.334501	0.260045	Decreasing	sig	stabilise	neutral
en155181_UBE2H	11.2694	15.5251	sig	Increasing	1.69657	1.91425	Increasing	sig	stabilise	enhance
en155182_UBE2H	11.2694	29.8859	sig	Increasing	1.75254	1.82301	Increasing	no	stabilise	neutral
en159448_CEBPD	2.24974	8.0815	sig	Increasing		1.14255			stabilise	noData
en160431_TRPA1	2.86184	36.1912	sig	Increasing	0.369545	0.456345	Increasing	no	stabilise	neutral
en161020_TBC1D5	19.0152	102.153	sig	Increasing	0.901188	0.883333	Decreasing	sig	stabilise	neutral
en162183_CLASP1	7.28337	11.9986	sig	Increasing	0.936167	1.13454	Increasing	sig	stabilise	enhance
en162385_SLC35G2	4.78009	28.3165	sig	Increasing	0.993973	0.912255	Decreasing	no	stabilise	neutral
en162894_NDUFAF6	17.0718	12959.3	sig	Increasing	0.592425	0.628782	Increasing	no	stabilise	neutral
en165280_UBAP1	5.4048	21.1045	sig	Increasing		0.638458			stabilise	noData
en165283_UBAP1	5.50662	29.9488	sig	Increasing		0.638555			stabilise	noData
en165287_UBAP1	5.34913	25.7677	sig	Increasing	0.648797	0.631322	Decreasing	no	stabilise	neutral
en165288_UBAP1	5.45977	16.0048	sig	Increasing	0.646502	0.637932	Decreasing	no	stabilise	neutral
en168498_CACNA2D3	12.7625	89.1929	sig	Increasing	0.527873	0.467584	Decreasing	sig	stabilise	neutral
en169499_NFE2L2	2.87489	20.0208	sig	Increasing		1.08133			stabilise	noData
en169605_G3BP1	18.3797	66.025	sig	Increasing	1.61009	1.44302	Decreasing	no	stabilise	neutral
en17190_PFKFB3	3.77031	12.8504	sig	Increasing		1.11091			stabilise	noData
en17194_PFKFB3	3.36578	12.892	sig	Increasing		1.10471			stabilise	noData
en173746_KLHL15	3.66513	7.77298	sig	Increasing					stabilise	noData
en173749_KLHL15	3.88394	8.86372	sig	Increasing					stabilise	noData
en174858_ZNF41	3.39894	9.57665	sig	Increasing					stabilise	noData
en175234_CCDC120	4.17134	66.1503	sig	Increasing					stabilise	noData
en175936_RIBC1	8.19709	421.904	sig	Increasing					stabilise	noData
en178138_HFM1	6.04782	51.7491	sig	Increasing					stabilise	noData
en17818_STAM	3.74172	15.2785	sig	Increasing	1.41162	1.6239	Increasing	sig	stabilise	enhance
en178213_MT-ND4	9.01706	28.5336	sig	Increasing					stabilise	noData
en180027_GRIA3	3.01157	13.6496	sig	Increasing					stabilise	noData
en1909_RABEP1	13.5952	51.4528	sig	Increasing	0.393881	0.459602	Increasing	sig	stabilise	enhance
en20220_RPAP2	5.49444	31.7768	sig	Increasing	0.949837	1.01721	Increasing	no	stabilise	neutral
en23110_HPS6	1.07619	1.84163	sig	Increasing	0.825024	1.05024	Increasing	sig	stabilise	enhance
en23110_PPRC1	1.79107	3.43837	sig	Increasing	0.811056	0.71522	Decreasing	no	stabilise	neutral
en23114_PITX3	6.10599	27.0414	sig	Increasing	0.565538	0	Decreasing	sig	stabilise	neutral
en25697_CDHR5	6.33112	2.93279	sig	Decreasing	0.0316874	0	Decreasing	sig	destabilise	suppress
en26842_ZNF143	3.06732	21.65	sig	Increasing	1.07064	1.00148	Decreasing	no	stabilise	neutral
en26860_ZNF143	2.99465	10.163	sig	Increasing	1.04652	1.01246	Decreasing	no	stabilise	neutral
en29747_RELA	5.19994	11.2412	sig	Increasing	1.23144	1.20839	Decreasing	no	stabilise	neutral
en29747_SLC25A45	10.753	39.4836	sig	Increasing	0.546867	0.449562	Decreasing	no	stabilise	neutral
en29781_AP5B1	1.64392	4.82489	sig	Increasing	0.678692	0.763375	Increasing	no	stabilise	neutral
en29781_LTBP3	16.3672	37.2483	sig	Increasing	0.866862	0.918535	Increasing	no	stabilise	neutral
en29781_MAP3K11	5.34968	15.0323	sig	Increasing	0.250163	0.180529	Decreasing	sig	stabilise	neutral
en29781_RELA	5.19977	10.2061	sig	Increasing	1.4828	1.03962	Decreasing	sig	stabilise	neutral
en29781_RNASEH2C	22.303	254.098	sig	Increasing	1.10189	1.15287	Increasing	sig	stabilise	enhance
en29781_SLC25A45	10.0752	36.8938	sig	Increasing	0.554221	0.445877	Decreasing	no	stabilise	neutral
en29806_AP5B1	1.67831	5.28337	sig	Increasing	0.696477	0.729214	Increasing	no	stabilise	neutral
en29940_RBM14-RBM4	1.35132	7.311	sig	Increasing	1.05266	0.129202	Decreasing	sig	stabilise	neutral
en30252_SLCO5A1	2.71893	20.9415	sig	Increasing	0.281524	0.15512	Decreasing	sig	stabilise	neutral
en31324_KIAA0040	3.51588	12.4365	sig	Increasing	0.486545	0.437997	Decreasing	sig	stabilise	neutral
en31348_MT-ND5	4.10579	9.63316	sig	Increasing	0	0			stabilise	noData
en35516_SPC25	8.33484	31.2476	sig	Increasing	1.91625	2.18131	Increasing	no	stabilise	neutral
en35877_PIKFYVE	7.1772	33.7102	sig	Increasing	0.450525	0.438596	Decreasing	sig	stabilise	neutral
en35877_RPS29	6.52962	145.648	sig	Increasing	0.555334	0.543362	Decreasing	no	stabilise	neutral
en35897_ANKUB1	2.20276	56.8016	sig	Increasing	0.685358	0	Decreasing	sig	stabilise	neutral
en37896_ATF1	8.99753	20.1984	sig	Increasing	1.02215	1.16201	Increasing	sig	stabilise	enhance
en37896_DIP2B	8.88868	51.2945	sig	Increasing	0.871353	0.80477	Decreasing	sig	stabilise	neutral
en38535_RBMS2	26.6518	283.68	sig	Increasing		0.650048			stabilise	noData
en38544_RBMS2	25.8591	279.367	sig	Increasing		0.666738			stabilise	noData
en38545_RBMS2	27.1247	287.992	sig	Increasing		0.650048			stabilise	noData
en38548_RBMS2	27.1247	287.992	sig	Increasing		0.674674			stabilise	noData
en40994_TIAL1	8.23811	71.361	sig	Increasing	0.992237	1.38133	Increasing	sig	stabilise	enhance
en41005_PDE3A	8.32107	21.3602	sig	Increasing	0.519598	0.857282	Increasing	sig	stabilise	enhance
en41005_RNF185	6.277	12.5683	sig	Increasing	1.24776	1.22882	Decreasing	no	stabilise	neutral
en41135_TXNRD1	15.3211	86.5295	sig	Increasing	0.914588	0.903364	Decreasing	no	stabilise	neutral
en41136_TXNRD1	15.8953	260.536	sig	Increasing		0.912251			stabilise	noData
en41925_RBM19	10.1967	72.1689	sig	Increasing	0.881163	0.765566	Decreasing	sig	stabilise	neutral
en43491_HFM1	6.76915	52.5945	sig	Increasing	0.363018	0.177553	Decreasing	sig	stabilise	neutral
en43958_DDX39B	8.20024	56.8313	sig	Increasing	1.31744	1.3274	Increasing	sig	stabilise	enhance
en4528_CDKN2C	6.31564	15.9227	sig	Increasing	0.330782	0.361201	Increasing	sig	stabilise	enhance
en4529_CDKN2C	6.10395	10.5253	sig	Increasing	0.146691	0.352885	Increasing	sig	stabilise	enhance
en4529_FAF1	9.05102	21.2274	sig	Increasing	0.797197	0.726814	Decreasing	sig	stabilise	neutral
en47531_PDE3A	9.92807	41.6598	sig	Increasing		0.933968			stabilise	noData
en48719_NFKBIA	0.620541	2.23812	sig	Increasing		1.23419			stabilise	noData
en49221_GTF2IRD1	3.88611	12.7844	sig	Increasing	0.569412	0.615282	Increasing	sig	stabilise	enhance
en52213_VRK1	11.056	19.0115	sig	Increasing	1.3008	1.15991	Decreasing	no	stabilise	neutral
en54132_RAD51	9.94754	123.747	sig	Increasing		1.35132			stabilise	noData
en54780_WDR76	6.2057	33.4225	sig	Increasing	0.839093	0.874847	Increasing	no	stabilise	neutral
en55627_RFX7	2.9521	5.61627	sig	Increasing		0.668315			stabilise	noData
en56506_LUC7L2	12.3053	286.82	sig	Increasing	1.75669	1.19219	Decreasing	sig	stabilise	neutral
en57194_C15orf39	0.973803	4.1561	sig	Increasing		0.862842			stabilise	noData
en60121_DENND4C	6.45569	32.4356	sig	Increasing	0.700096	0.739768	Increasing	no	stabilise	neutral
en60300_NTAN1	15.2841	118.865	sig	Increasing	0.162111	0.190407	Increasing	sig	stabilise	enhance
en60300_PDXDC1	29.8447	414.454	sig	Increasing	0.661434	0.679804	Increasing	no	stabilise	neutral
en60485_CGGBP1	6.52926	35.5497	sig	Increasing	0.826749	0.909713	Increasing	sig	stabilise	enhance
en60485_EXOSC3	4.13393	8.84351	sig	Increasing	1.09149	1.15719	Increasing	no	stabilise	neutral
en60485_FAM185A	5.93269	52.0195	sig	Increasing	0.459945	0.515505	Increasing	no	stabilise	neutral
en60485_FILIP1L	1.41311	12.6544	sig	Increasing	0.520163	0.364206	Decreasing	sig	stabilise	neutral
en60485_SLCO5A1	2.51302	10.0342	sig	Increasing	0.117805	0.234639	Increasing	sig	stabilise	enhance
en60485_SPATA9	3.91228	12.6792	sig	Increasing	0	0		no	stabilise	neutral
en61661_SH2B1	18.642	430.87	sig	Increasing		0.364141			stabilise	noData
en63726_AARS1	15.4249	387.725	sig	Increasing		1.42514			stabilise	noData
en63729_DDX19A	23.6079	399.7	sig	Increasing		1.629			stabilise	noData
en63734_EXOSC6	5.0966	10.223	sig	Increasing	1.29904	1.87466	Increasing	sig	stabilise	enhance
en66319_PFAS	28.1716	44.902	sig	Increasing	1.2435	1.21727	Decreasing	no	stabilise	neutral
en67468_USP22	5.81939	21.4236	sig	Increasing	1.01269	1.26228	Increasing	sig	stabilise	enhance
en67526_ARCN1	14.4888	810.297	sig	Increasing		1.82381			stabilise	noData
en69782_CNTD1	2.03664	4.71755	sig	Increasing	0	0		no	stabilise	neutral
en71310_SRSF1	11.5053	34.75	sig	Increasing	0.995532	0.923207	Decreasing	sig	stabilise	neutral
en71471_HEATR6	3.34144	16.0461	sig	Increasing		0.939997			stabilise	noData
en71793_INTS2	8.2355	96.4633	sig	Increasing		1.11802			stabilise	noData
en71940_INTS2	7.71889	30.2225	sig	Increasing		1.10846			stabilise	noData
en71940_MED13	3.21678	13.4	sig	Increasing		0.307523			stabilise	noData
en72484_DNAJB1	1.36555	4.51384	sig	Increasing		0.997665			stabilise	noData
en73977_TEX19	1.14236	0.803984	sig	Decreasing	0.953104	0	Decreasing	sig	destabilise	suppress
en744_HUNK	1.36269	12.0534	sig	Increasing		1.1717			stabilise	noData
en76021_NIPA2	14.5134	118.825	sig	Increasing	0.403917	0.486432	Increasing	sig	stabilise	enhance
en76021_PTPRJ	10.8678	49.4168	sig	Increasing	0.684764	0.623796	Decreasing	sig	stabilise	neutral
en76021_SLCO5A1	2.59465	10.0342	sig	Increasing	0.136295	0.224809	Increasing	sig	stabilise	enhance
en77437_MT-CO1	9.90139	285.714	sig	Increasing	0	0			stabilise	noData
en78961_TLE6	11.5287	319.41	sig	Increasing		0.992116			stabilise	noData
en78964_TLE6	11.0746	170.797	sig	Increasing		0.965846			stabilise	noData
en78965_TLE6	11.5287	319.41	sig	Increasing		0.971964			stabilise	noData
en80598_GSK3B	3.10213	9.73972	sig	Increasing	0.924817	1.09637	Increasing	sig	stabilise	enhance
en81296_AKAP8	4.98793	14.6257	sig	Increasing		0.923298			stabilise	noData
en81296_BRD4	7.62508	19.4505	sig	Increasing		1.42686			stabilise	noData
en81300_BRD4	7.07992	13.7981	sig	Increasing	1.07877	1.95611	Increasing	sig	stabilise	enhance
en81611_HAUS8	2.15376	3.76698	sig	Increasing	1.09017	1.10679	Increasing	no	stabilise	neutral
en82978_U2AF1L4	10.9909	106.075	sig	Increasing		0.444604			stabilise	noData
en82979_PROSER3	6.69736	14.5558	sig	Increasing	1.16625	1.04	Decreasing	sig	stabilise	neutral
en86095_MT-ND2	1.93046	5.56988	sig	Increasing	0	0			stabilise	noData
en88166_ZNF329	1.59812	4.49613	sig	Increasing	0.304026	0.246182	Decreasing	sig	stabilise	neutral
en89300_NR2C2	5.97221	10.194	sig	Increasing	0.706874	0.666309	Decreasing	sig	stabilise	neutral
en9101_PEX11B	3.62407	9.77063	sig	Increasing	1.34246	1.56754	Increasing	sig	stabilise	enhance
en9101_RNF115	12.2057	37.7995	sig	Increasing	0.790766	0.891657	Increasing	sig	stabilise	enhance
en91395_ANTXR1	14.0927	48.0394	sig	Increasing	1.56676	1.87515	Increasing	sig	stabilise	enhance
en91998_IRF1	1.27159	2.18377	sig	Increasing	1.37519	1.47711	Increasing	sig	stabilise	enhance
en91998_WDPCP	14.2582	34.2729	sig	Increasing	0.528402	0.499508	Decreasing	no	stabilise	neutral
en92078_BRCA1	8.64367	45.2851	sig	Increasing		0.614855			stabilise	noData
en95251_FAM168B	16.1735	92.9322	sig	Increasing		1.45031			stabilise	noData
en96379_MARCHF7	3.21894	7.61798	sig	Increasing	1.15029	1.00171	Decreasing	sig	stabilise	neutral
en96719_BLM	3.15447	19.6817	sig	Increasing	0.730086	0.581157	Decreasing	sig	stabilise	neutral
en97509_XRRA1	5.90389	9.16686	sig	Increasing	0.605087	0.548982	Decreasing	sig	stabilise	neutral
en9834_APH1A	43.8378	679.387	sig	Increasing		0.636689			stabilise	noData
en98391_PMM2	6.5695	13.2554	sig	Increasing	1.42136	1.27632	Decreasing	sig	stabilise	neutral
en9868_MCL1	1.7734	4.64807	sig	Increasing		1.58825			stabilise	noData
en9868_RPRD2	2.0416	8.17398	sig	Increasing		1.09118			stabilise	noData
en99678_APOOL	24.1276	205.914	sig	Increasing		2.3051			stabilise	noData
en99679_APOOL	23.551	205.914	sig	Increasing		2.33126			stabilise	noData
en99697_HCFC1	8.97786	24.6114	sig	Increasing		1.07636			stabilise	noData
