# Supplementary material
Source: HighWire-hosted journal article supplement (doi:10.1101/rna.080681.125)
Supplement: Supplemental_Table_S8.xlsx [file Supplemental_Table_S8.xlsx]

## Sheet: Table S8
Oligonucleotides and siRNAs used in this study. List of all small interfering RNAs (siRNAs), primer sequences, and other oligonucleotides used for gene knockdown and RT–qPCR validation experiments.
Target	Type	plus/Forward	minus/Reverse	Genomic Coordinates
Negative control si	siRNA	5' rCrGrUrUrArArUrCrGrCrGrUrArUrArArUrArCrGrCrGrUAT 3'	5' rArUrArCrGrCrGrUrArUrUrArUrArCrGrCrGrArUrUrArArCrGrArC 3'	IDT Universal non-targeting negative control : CAT #51-01-14-03
en4528	siRNA	5' rGrCrArArCrCrUrCrArUrUrCrCrUrArArUrUrGrArGrArATA 3'	5' rUrArUrUrCrUrCrArArUrUrArGrGrArArUrGrArGrGrUrUrGrCrCrU 3'	chr1:51,002,598-51,002,623
en4528	qPCR_primer	TGATCTTGGCTCACTGCAAG	GCCTGTAGTCCCAGCTATTTATG	Forward[chr1:51,002,370-51,002,389],Reverse[chr1:51,002,430-51,002,452]
CDKN2C	qPCR_primer	AGGGGGGACCTAGAGCAACTTAC	GGCAGGTTCCCTTCATTATCC
FAF1	qPCR_primer	GCCACCAATTATGGGAGGG	CAGATCCCAAGCCCAGGT
GAPDH	qPCR_primer	ACCACAGTCCATGCCATCAC	TCCACCACCCTGTTGCTGTA
DHDDS	qPCR_primer	GTCTCCCACGAGTACACTAAAC	AGATCCAAGGTAGAGCCAAATC
C1orf185	qPCR_primer	GATGAGAGATGCAGGCAAAGA	GGTCTCTGAGGGATCACAAATG
